# Supplementary material for: Limb-Enhancer Genie: An accessible resource of accurate enhancer predictions in the developing limb
Source: PLoS Comput Biol. 2017 Aug 21;13(8):e1005720. doi: 10.1371/journal.pcbi.1005720 (PMC5578682; doi:10.1371/journal.pcbi.1005720)
Supplement: S1 Table — Mm10 coordinates are provided, along with the coordinates and the identifier of each element as indicated at http://enhancer.lbl.gov/ [4]. Whether each element was positive or negative for activity in E11.5 limbs is also indicated. 2,201 out of 2,203 elements were considered throughout the study and for machine learning (ML), so this information is also provided (see Extended Methods). (XLSX) [file pcbi.1005720.s011.xlsx]

## Sheet: S1
Chrom (mm10)	Start (mm10)	End (mm10)	Assembly (original)	Chrom (original)	Start (original)	End (original)	VISTA identifier	Limb-activity	Considered in ML
chr1	5021600	5024300	mm9	chr1	5011681	5014381	mm912	negative	yes
chr1	6729233	6730318	hg19	chr8	53166730	53167836	hs698	negative	yes
chr1	11026040	11028544	mm9	chr1	11016121	11018625	mm663	negative	yes
chr1	12614812	12617322	mm9	chr1	12604893	12607403	mm664	negative	yes
chr1	13003747	13006556	mm9	chr1	12993828	12996637	mm1342	negative	yes
chr1	18388786	18390258	hg19	chr6	50126514	50127963	hs942	negative	yes
chr1	18955282	18957504	hg19	chr6	50552252	50554393	hs787	negative	yes
chr1	19106734	19107712	hg19	chr6	50685244	50686237	hs865	negative	yes
chr1	19557948	19558842	hg19	chr6	51076205	51077209	hs216	negative	yes
chr1	19699458	19700530	hg19	chr6	51148668	51149710	hs217	negative	yes
chr1	20106392	20107514	hg19	chr6	51515894	51517015	hs538	negative	yes
chr1	20919958	20922635	hg19	chr6	52253728	52256212	hs2064	negative	yes
chr1	31101599	31104444	mm9	chr1	31158444	31161289	mm1357	negative	yes
chr1	33989736	33992240	mm9	chr1	34046581	34049085	mm665	negative	yes
chr1	38196744	38201861	mm9	chr1	38253589	38258706	mm1306	negative	yes
chr1	39441763	39444709	hg19	chr2	101726098	101729492	hs1933	negative	yes
chr1	39945610	39950472	mm9	chr1	40002455	40007317	mm1333	negative	yes
chr1	40942806	40944270	hg19	chr2	103538361	103539868	hs1212	negative	yes
chr1	40954286	40955586	hg19	chr2	103548426	103549712	hs1125	negative	yes
chr1	40967280	40968275	hg19	chr2	103559966	103560972	hs810	negative	yes
chr1	41143600	41146576	hg19	chr2	103768696	103772482	hs1581	negative	yes
chr1	41165839	41167312	hg19	chr2	103792328	103793819	hs1093	negative	yes
chr1	41274880	41276860	hg19	chr2	103909358	103911221	hs1112	positive	yes
chr1	41388600	41391399	hg19	chr2	104016646	104019824	hs1555	negative	yes
chr1	41426651	41428589	hg19	chr2	104060734	104062561	hs958	negative	yes
chr1	41429480	41432117	hg19	chr2	104063598	104065812	hs977	negative	yes
chr1	41558535	41559896	hg19	chr2	104285458	104286792	hs1147	negative	yes
chr1	41603695	41607210	hg19	chr2	104353933	104357342	hs1526	negative	yes
chr1	41810882	41811922	hg19	chr2	104576225	104577270	hs1126	negative	yes
chr1	41812941	41815356	hg19	chr2	104578156	104580488	hs1529	negative	yes
chr1	41896304	41898180	hg19	chr2	104648312	104650249	hs1140	negative	yes
chr1	41917498	41920605	hg19	chr2	104667872	104670648	hs1303	negative	yes
chr1	41935262	41937041	hg19	chr2	104686690	104688638	hs1554	negative	yes
chr1	41981433	41982259	hg19	chr2	104736518	104737365	hs401	negative	yes
chr1	42242415	42244647	hg19	chr2	105032493	105034445	hs1131	negative	yes
chr1	42255267	42258543	hg19	chr2	105044282	105047512	hs1534	negative	yes
chr1	42258657	42259850	hg19	chr2	105047627	105048798	hs960	negative	yes
chr1	42365768	42366767	hg19	chr2	105132815	105133830	hs702	negative	yes
chr1	42423142	42424011	hg19	chr2	105187861	105188859	hs938	negative	yes
chr1	42471587	42473853	hg19	chr2	105254095	105256398	hs584	negative	yes
chr1	42521380	42523862	hg19	chr2	105300344	105301657	hs1177	negative	yes
chr1	42538720	42541030	hg19	chr2	105317580	105319856	hs969	negative	yes
chr1	42678245	42679419	hg19	chr2	105452973	105454169	hs1121	negative	yes
chr1	42690175	42692711	hg19	chr2	105464986	105467538	hs1553	negative	yes
chr1	42740655	42742396	hg19	chr2	105516737	105518490	hs990	negative	yes
chr1	42888323	42889246	hg19	chr2	105697211	105698158	hs868	negative	yes
chr1	52079533	52080137	mm9	chr1	52136377	52136981	mm1	negative	yes
chr1	54904981	54908576	mm9	chr1	54961825	54965420	mm711	negative	yes
chr1	55947134	55948986	hg19	chr2	199226864	199228567	hs1253	negative	yes
chr1	56286330	56287543	mm9	chr1	56343174	56344387	mm613	negative	yes
chr1	56403047	56404314	hg19	chr2	199681972	199683281	hs950	negative	yes
chr1	58952904	58956413	mm9	chr1	59009748	59013257	mm88	negative	yes
chr1	59340862	59342046	mm9	chr1	59397706	59398890	mm489	negative	yes
chr1	67365819	67367727	hg19	chr2	211664571	211666475	hs1541	negative	yes
chr1	68045929	68048127	hg19	chr2	212254840	212257158	hs1578	negative	yes
chr1	68779329	68782031	mm9	chr1	68825903	68828605	mm1358	negative	yes
chr1	68864846	68866697	hg19	chr2	213141079	213142308	hs1207	negative	yes
chr1	74030234	74032407	hg19	chr2	218801171	218803563	hs1764	negative	yes
chr1	75288287	75291172	mm9	chr1	75284862	75287747	mm1372	negative	yes
chr1	75347166	75347630	hg19	chr2	220271494	220272006	hs504	negative	yes
chr1	75405255	75409484	mm9	chr1	75401830	75406059	mm1355	negative	yes
chr1	75769003	75773592	hg19	chr2	220713868	220717300	hs1507	positive	yes
chr1	75832718	75835169	hg19	chr2	220771085	220773279	hs1635	positive	yes
chr1	78114828	78115847	hg19	chr2	223079383	223080439	hs493	negative	yes
chr1	78184099	78185294	hg19	chr2	223150742	223151920	hs1730	negative	yes
chr1	78966374	78968073	hg19	chr2	169971561	169974373	hs2034	negative	yes
chr1	81520227	81522255	hg19	chr2	226758670	226760695	hs1376	negative	yes
chr1	84548810	84551347	mm9	chr1	84545385	84547922	mm666	negative	yes
chr1	86487834	86492772	hg19	chr2	232527256	232532109	hs1886	negative	yes
chr1	89713750	89714911	hg19	chr2	236773458	236774696	hs521	positive	yes
chr1	89847708	89849945	hg19	chr2	236962599	236964857	hs921	positive	yes
chr1	89925517	89926000	hg19	chr2	237071364	237071848	hs249	negative	yes
chr1	90006776	90007806	hg19	chr2	237165066	237166143	hs1243	negative	yes
chr1	90246249	90247693	mm9	chr1	92142824	92144268	mm275	negative	yes
chr1	90288936	90290388	mm9	chr1	92185511	92186963	mm315	negative	yes
chr1	90753352	90755909	hg19	chr2	238221820	238225273	hs1951	negative	yes
chr1	90976559	90981159	hg19	chr2	238522379	238526567	hs1945	negative	yes
chr1	91208179	91212307	hg19	chr2	238803368	238807597	hs1968	negative	yes
chr1	91962928	91965960	mm9	chr1	93859505	93862537	mm901	negative	yes
chr1	92718794	92721273	hg19	chr2	241197357	241200155	hs1750	negative	yes
chr1	92785989	92787910	hg19	chr2	241307979	241312994	hs1937	positive	yes
chr1	97538497	97542741	mm9	chr1	99435074	99439318	mm1317	negative	yes
chr1	98187843	98193254	hg19	chr5	101999073	102003903	hs1649	positive	yes
chr1	109514248	109514854	hg19	chr18	63078262	63078839	hs947	negative	yes
chr1	118776527	118778050	hg19	chr2	121832418	121833317	hs522	negative	yes
chr1	118988412	118994613	hg19	chr2	121562286	121565707	hs1790	negative	yes
chr1	127530776	127531768	hg19	chr2	135279657	135281488	hs1728	negative	yes
chr1	127754802	127759066	mm9	chr1	129651379	129655643	mm1363	negative	yes
chr1	129954812	129956885	hg19	chr2	138212509	138214475	hs1729	negative	yes
chr1	133079894	133080923	hg19	chr1	204423958	204424935	hs1368	negative	yes
chr1	133549313	133550886	mm9	chr1	135445890	135447463	mm112	negative	yes
chr1	133744227	133745595	hg19	chr1	203660971	203662806	hs2404	negative	yes
chr1	138405489	138407331	hg19	chr1	198339402	198341607	hs1443	negative	yes
chr1	138499160	138501332	hg19	chr1	198263562	198265742	hs1322	negative	yes
chr1	148482151	148483266	hg19	chr1	188376723	188378052	hs1780	negative	yes
chr1	154033856	154034857	mm9	chr1	155880986	155881987	mm153	negative	yes
chr1	155038429	155040658	hg19	chr1	181121049	181123654	hs1862	negative	yes
chr1	158265467	158268046	mm9	chr1	160195598	160198177	mm1369	negative	yes
chr1	162074031	162077560	mm9	chr1	164004162	164007691	mm712	positive	yes
chr1	162830457	162833967	mm9	chr1	164760588	164764098	mm713	positive	yes
chr1	163897222	163899818	hg19	chr1	169910396	169913079	hs1442	positive	yes
chr1	165934235	165936308	hg19	chr1	167296954	167299046	hs1331	negative	yes
chr1	168168620	168170074	hg19	chr1	164805507	164806794	hs1191	negative	yes
chr1	168268573	168269857	hg19	chr1	164700259	164701522	hs1136	negative	yes
chr1	168294792	168296738	hg19	chr1	164672787	164674206	hs970	negative	yes
chr1	168299765	168300981	hg19	chr1	164668592	164669823	hs1144	negative	yes
chr1	168327072	168328498	hg19	chr1	164637575	164639037	hs203	negative	yes
chr1	168341598	168342834	hg19	chr1	164620038	164621164	hs1235	negative	yes
chr1	168357094	168358536	hg19	chr1	164604141	164605474	hs1202	negative	yes
chr1	168760969	168763111	hg19	chr1	164197827	164199172	hs1230	negative	yes
chr1	168908406	168909388	hg19	chr1	164023244	164024214	hs202	negative	yes
chr1	168991095	168992057	hg19	chr1	163939700	163940637	hs201	negative	yes
chr1	169343700	169345192	hg19	chr1	163507965	163509139	hs1185	positive	yes
chr1	169385395	169386298	hg19	chr1	163441941	163442842	hs762	negative	yes
chr1	169476673	169478008	hg19	chr1	163359231	163360494	hs1156	negative	yes
chr1	177150037	177151455	hg19	chr1	243876467	243877893	hs545	negative	yes
chr1	177171230	177171899	hg19	chr1	243895796	243896468	hs214	negative	yes
chr1	177447324	177448425	hg19	chr1	244217325	244218426	hs476	negative	yes
chr1	179385809	179386339	hg19	chr1	246469251	246471350	hs2070	negative	yes
chr1	180208458	180212549	hg19	chr1	227106400	227109773	hs2132	negative	yes
chr1	180268494	180269405	hg19	chr1	227014699	227016924	hs2131	negative	yes
chr1	181255937	181259663	mm9	chr1	183186068	183189794	mm24	negative	yes
chr1	182109962	182112053	hg19	chr1	225954390	225955885	hs2374	negative	yes
chr1	184041273	184042782	hg19	chr1	221906778	221908480	hs1663	negative	yes
chr1	186908317	186910078	hg19	chr1	218222277	218224086	hs1255	negative	yes
chr1	186922311	186923506	hg19	chr1	218207432	218208498	hs1257	negative	yes
chr1	187248278	187249479	hg19	chr1	217766122	217767351	hs734	negative	yes
chr1	188118947	188119938	hg19	chr1	216772416	216773458	hs175	negative	yes
chr1	188883844	188885252	hg19	chr1	215888921	215890374	hs366	negative	yes
chr1	190061319	190062349	hg19	chr1	214280595	214282080	hs2357	negative	yes
chr1	190653741	190655122	hg19	chr1	213597964	213599524	hs204	negative	yes
chr1	190727304	190730174	hg19	chr1	213498112	213501134	hs1324	negative	yes
chr1	191239014	191241717	hg19	chr1	212704746	212707293	hs2089	negative	yes
chr1	192784315	192784989	mm9	chr1	194610509	194611183	mm617	negative	yes
chr1	192789593	192791084	mm9	chr1	194615787	194617278	mm430	negative	yes
chr1	192798093	192800700	mm9	chr1	194624287	194626894	mm646	positive	yes
chr1	192806324	192807093	mm9	chr1	194632518	194633287	mm618	negative	yes
chr1	192822580	192825953	hg19	chr1	210433698	210437258	hs1617	negative	yes
chr1	192851640	192852457	mm9	chr1	194677834	194678651	mm433	negative	yes
chr1	193141049	193141723	hg19	chr1	209989050	209989824	hs932	positive	yes
chr1	193449329	193450185	mm9	chr1	195275523	195276379	mm935	negative	yes
chr1	193989015	193991785	hg19	chr1	209064233	209067059	hs1694	negative	yes
chr2	4297327	4301456	mm9	chr2	4218373	4222502	mm418	negative	yes
chr2	4339658	4341457	mm9	chr2	4260704	4262503	mm28	positive	yes
chr2	4348338	4349353	mm9	chr2	4269384	4270399	mm419	negative	yes
chr2	4361908	4362689	mm9	chr2	4282954	4283735	mm420	negative	yes
chr2	4556144	4557875	mm9	chr2	4477190	4478921	mm422	positive	yes
chr2	4587585	4588762	mm9	chr2	4508631	4509808	mm423	positive	yes
chr2	4882644	4883763	mm9	chr2	4803690	4804809	mm424	negative	yes
chr2	6260694	6262916	hg19	chr10	11721307	11722768	hs1382	negative	yes
chr2	7639724	7642480	hg19	chr10	10335147	10338188	hs2237	negative	yes
chr2	12065185	12068019	mm9	chr2	11986812	11989646	mm30	negative	yes
chr2	18046233	18047055	mm9	chr2	17967860	17968682	mm270	negative	yes
chr2	18973198	18973733	hg19	chr10	22981895	22983289	hs2048	negative	yes
chr2	19455026	19455689	hg19	chr10	23490838	23491508	hs826	negative	yes
chr2	30654264	30656448	mm9	chr2	30509784	30511968	mm320	negative	yes
chr2	31004939	31008077	mm9	chr2	30860459	30863597	mm1325	negative	yes
chr2	31499311	31500827	hg19	chr9	133353647	133355097	hs1328	negative	yes
chr2	31640644	31641311	hg19	chr9	133540555	133541228	hs876	negative	yes
chr2	32053417	32057197	hg19	chr9	134110296	134115184	hs1963	negative	yes
chr2	32127730	32128586	mm9	chr2	31983250	31984106	mm194	negative	yes
chr2	32908279	32909524	mm9	chr2	32763799	32765044	mm238	negative	yes
chr2	33788144	33790460	hg19	chr9	129198400	129200739	hs186	negative	yes
chr2	33841539	33845598	mm9	chr2	33697059	33701118	mm1354	negative	yes
chr2	33875330	33878839	mm9	chr2	33730850	33734359	mm716	positive	yes
chr2	34016021	34017342	hg19	chr9	128945054	128946417	hs1108	negative	yes
chr2	34033023	34033764	hg19	chr9	128919674	128920432	hs1015	negative	yes
chr2	34064833	34066528	hg19	chr9	128869446	128870934	hs987	negative	yes
chr2	34166779	34167773	hg19	chr9	128735158	128736174	hs1103	negative	yes
chr2	34229437	34230578	hg19	chr9	128671865	128673002	hs317	negative	yes
chr2	34235169	34236290	hg19	chr9	128666411	128667552	hs1000	negative	yes
chr2	34255334	34257139	hg19	chr9	128645462	128647097	hs1017	negative	yes
chr2	34260196	34261370	hg19	chr9	128640165	128641327	hs1095	negative	yes
chr2	34286509	34288341	hg19	chr9	128606519	128608350	hs1099	negative	yes
chr2	34310582	34311104	hg19	chr9	128583956	128584480	hs316	negative	yes
chr2	34356456	34359026	hg19	chr9	128522875	128525442	hs1102	negative	yes
chr2	34359232	34360875	hg19	chr9	128520992	128522653	hs818	negative	yes
chr2	34363449	34364811	hg19	chr9	128516934	128518372	hs1030	negative	yes
chr2	34455218	34456803	hg19	chr9	128406147	128407653	hs185	negative	yes
chr2	34462108	34463283	hg19	chr9	128395759	128396938	hs788	negative	yes
chr2	38142558	38144874	hg19	chr9	126537718	126539929	hs314	negative	yes
chr2	38195269	38199898	hg19	chr9	126595592	126598852	hs1794	negative	yes
chr2	38535055	38537083	mm9	chr2	38390575	38392603	mm160	negative	yes
chr2	38594702	38595720	hg19	chr9	127123220	127124245	hs600	negative	yes
chr2	43781987	43783031	hg19	chr2	143914409	143915473	hs402	negative	yes
chr2	43977739	43979507	hg19	chr2	144103882	144105644	hs675	negative	yes
chr2	43986279	43987229	hg19	chr2	144111861	144112818	hs403	negative	yes
chr2	43989287	43991110	hg19	chr2	144115008	144116735	hs663	negative	yes
chr2	44572995	44574695	hg19	chr2	144712189	144713913	hs404	negative	yes
chr2	45023631	45025444	hg19	chr2	145188099	145189812	hs407	negative	yes
chr2	45036258	45037036	hg19	chr2	145200646	145201413	hs409	negative	yes
chr2	45053671	45058470	mm9	chr2	44909191	44913990	mm1380	negative	yes
chr2	45102219	45104360	hg19	chr2	145267267	145269283	hs2256	negative	yes
chr2	45171144	45172955	hg19	chr2	145339602	145341530	hs1802	negative	yes
chr2	45836162	45837257	hg19	chr2	146002552	146003648	hs617	negative	yes
chr2	45921900	45923049	hg19	chr2	146057507	146058645	hs777	negative	yes
chr2	46326766	46328057	hg19	chr2	146412340	146413619	hs544	negative	yes
chr2	46666275	46667373	hg19	chr2	146689050	146690099	hs649	negative	yes
chr2	46669500	46670495	hg19	chr2	146692288	146693283	hs568	negative	yes
chr2	46674604	46675472	hg19	chr2	146697738	146698645	hs760	negative	yes
chr2	46801607	46803612	hg19	chr2	146797628	146799643	hs534	negative	yes
chr2	47133822	47134610	hg19	chr2	147133970	147134751	hs410	negative	yes
chr2	47183582	47185337	hg19	chr2	147172004	147173802	hs609	positive	yes
chr2	47263332	47264195	hg19	chr2	147260541	147261416	hs719	negative	yes
chr2	47302030	47303333	hg19	chr2	147289398	147290668	hs773	negative	yes
chr2	47334272	47335444	hg19	chr2	147333773	147334965	hs805	negative	yes
chr2	50969347	50972438	hg19	chr2	151182874	151185472	hs1386	negative	yes
chr2	56253983	56255716	hg19	chr2	156399791	156401487	hs803	negative	yes
chr2	56257296	56258347	hg19	chr2	156403022	156404115	hs580	negative	yes
chr2	56455286	56457265	hg19	chr2	156584380	156586345	hs551	negative	yes
chr2	56518707	56520248	hg19	chr2	156658670	156660246	hs549	negative	yes
chr2	56576465	56577480	hg19	chr2	156726581	156727605	hs411	negative	yes
chr2	56591692	56592843	hg19	chr2	156762038	156763191	hs691	negative	yes
chr2	56916091	56916889	hg19	chr2	156991360	156992132	hs412	negative	yes
chr2	57341949	57344456	mm9	chr2	57194360	57196867	mm667	positive	yes
chr2	57517307	57518247	hg19	chr2	157551014	157551952	hs413	negative	yes
chr2	57616984	57617851	hg19	chr2	157659848	157660720	hs414	negative	yes
chr2	57671881	57672832	hg19	chr2	157720628	157721586	hs662	negative	yes
chr2	57793277	57794576	hg19	chr2	157861101	157862409	hs573	negative	yes
chr2	57820408	57821348	hg19	chr2	157899792	157900721	hs415	positive	yes
chr2	57878888	57879847	hg19	chr2	158005545	158006521	hs794	negative	yes
chr2	59562345	59563132	hg19	chr2	159779317	159780341	hs1477	positive	yes
chr2	59597936	59601449	mm9	chr2	59435993	59439506	mm717	positive	yes
chr2	59668906	59672125	hg19	chr2	159885988	159889012	hs2027	negative	yes
chr2	59828773	59829361	mm9	chr2	59666830	59667418	mm282	negative	yes
chr2	61656142	61656716	hg19	chr2	162094895	162095451	hs416	negative	yes
chr2	63669378	63670651	hg19	chr2	164180913	164182192	hs689	negative	yes
chr2	63877720	63879192	hg19	chr2	164349676	164351112	hs890	negative	yes
chr2	63962796	63964416	hg19	chr2	164450144	164451758	hs170	negative	yes
chr2	64079255	64080739	hg19	chr2	164574007	164575458	hs640	negative	yes
chr2	64172017	64172993	hg19	chr2	164657051	164658028	hs606	negative	yes
chr2	64177546	64178374	hg19	chr2	164661606	164662430	hs420	negative	yes
chr2	64366222	64367228	hg19	chr2	164843797	164844783	hs421	negative	yes
chr2	65992128	65994633	mm9	chr2	65830185	65832690	mm668	negative	yes
chr2	69998509	69999848	hg19	chr2	170869607	170871165	hs1867	negative	yes
chr2	71418479	71422071	mm9	chr2	71256536	71260128	mm55	negative	yes
chr2	71516484	71518219	hg19	chr2	172936519	172938249	hs553	negative	yes
chr2	71527336	71528847	hg19	chr2	172947779	172949246	hs1423	negative	yes
chr2	71535378	71536557	hg19	chr2	172955879	172957052	hs422	negative	yes
chr2	71537156	71538581	hg19	chr2	172957645	172959046	hs423	negative	yes
chr2	72426155	72427698	hg19	chr2	174114371	174115933	hs242	negative	yes
chr2	73139371	73141413	hg19	chr2	174985544	174987464	hs243	positive	yes
chr2	73142671	73144272	hg19	chr2	174988737	174990363	hs244	negative	yes
chr2	73179758	73180791	hg19	chr2	175041403	175042500	hs574	negative	yes
chr2	73268418	73269496	hg19	chr2	175196043	175197114	hs860	negative	yes
chr2	73275594	73277184	hg19	chr2	175203263	175204895	hs953	negative	yes
chr2	73279567	73280473	hg19	chr2	175207310	175208242	hs245	negative	yes
chr2	74489927	74491300	hg19	chr2	176754029	176755385	hs616	negative	yes
chr2	74650860	74652235	hg19	chr2	176940070	176941410	hs246	negative	yes
chr2	75138220	75138763	hg19	chr2	177503157	177503671	hs248	negative	yes
chr2	79461477	79462272	hg19	chr2	182551041	182551809	hs626	negative	yes
chr2	82498030	82499136	hg19	chr2	186035364	186036499	hs1245	negative	yes
chr2	84517965	84520803	mm9	chr2	84358122	84360960	mm1324	negative	yes
chr2	93670758	93674396	hg19	chr11	44289927	44293764	hs2090	negative	yes
chr2	101589988	101594341	mm9	chr2	101430145	101434498	mm1328	positive	yes
chr2	102319035	102319919	hg19	chr11	35808002	35810908	hs2080	negative	yes
chr2	103623986	103627532	mm9	chr2	103464143	103467689	mm1312	negative	yes
chr2	103893011	103895665	hg19	chr11	33964286	33967857	hs1858	negative	yes
chr2	104893781	104894712	hg19	chr11	32808120	32809049	hs577	negative	yes
chr2	105333716	105335146	hg19	chr11	32197490	32198734	hs113	negative	yes
chr2	105447293	105448403	hg19	chr11	32052398	32053496	hs866	negative	yes
chr2	105515856	105516712	hg19	chr11	31989173	31990022	hs855	negative	yes
chr2	105611042	105614025	hg19	chr11	31895594	31899062	hs1531	negative	yes
chr2	105689600	105691450	hg19	chr11	31816452	31818421	hs1082	negative	yes
chr2	105718758	105720537	hg19	chr11	31785423	31787226	hs198	negative	yes
chr2	105778531	105780040	hg19	chr11	31685357	31686884	hs234	negative	yes
chr2	105833388	105834698	hg19	chr11	31622822	31624118	hs565	negative	yes
chr2	105913337	105914487	hg19	chr11	31502035	31503157	hs863	negative	yes
chr2	113691543	113692645	hg19	chr15	33091527	33092659	hs910	negative	yes
chr2	114123388	114123882	mm9	chr2	113949124	113949618	mm182	negative	yes
chr2	114411449	114413021	hg19	chr15	35545322	35546846	hs776	negative	yes
chr2	114739395	114740295	hg19	chr15	35918719	35919621	hs354	negative	yes
chr2	115537684	115539308	hg19	chr15	36819021	36820695	hs355	negative	yes
chr2	115656958	115658248	hg19	chr15	36964819	36966098	hs828	negative	yes
chr2	115658281	115659712	hg19	chr15	36966132	36967531	hs812	negative	yes
chr2	115669514	115669885	hg19	chr15	36983818	36984196	hs1871	negative	yes
chr2	115867988	115870503	mm9	chr2	115693724	115696239	mm669	negative	yes
chr2	115871243	115872482	hg19	chr15	37191408	37192621	hs489	negative	yes
chr2	115896429	115899400	hg19	chr15	37216993	37219601	hs1129	negative	yes
chr2	115919997	115921651	hg19	chr15	37240805	37242498	hs181	negative	yes
chr2	115962485	115963540	mm9	chr2	115788221	115789276	mm255	negative	yes
chr2	116018048	116020475	hg19	chr15	37347604	37349955	hs1178	negative	yes
chr2	116044886	116046285	hg19	chr15	37371729	37373137	hs1097	negative	yes
chr2	116200855	116202747	hg19	chr15	37512674	37514557	hs572	negative	yes
chr2	116212625	116213751	hg19	chr15	37521824	37522951	hs356	negative	yes
chr2	116323402	116325066	hg19	chr15	37652783	37654460	hs599	negative	yes
chr2	116807729	116809252	hg19	chr15	38159507	38161007	hs830	negative	yes
chr2	117427080	117430606	mm9	chr2	117252816	117256342	mm1368	negative	yes
chr2	118532227	118534856	hg19	chr15	40383560	40386138	hs1611	negative	yes
chr2	121549995	121551630	hg19	chr15	44171247	44173891	hs1881	negative	yes
chr2	124612597	124615764	hg19	chr15	48012796	48016252	hs1687	negative	yes
chr2	125491395	125493910	mm9	chr2	125317131	125319646	mm670	negative	yes
chr2	130351805	130352389	hg19	chr20	2719208	2719789	hs632	negative	yes
chr2	130489314	130493856	mm9	chr2	130315050	130319592	mm1313	negative	yes
chr2	132426454	132429102	mm9	chr2	132252190	132254838	mm1391	negative	yes
chr2	137247708	137248975	hg19	chr20	10793183	10794439	hs1278	positive	yes
chr2	137852330	137854841	mm9	chr2	137678066	137680577	mm671	positive	yes
chr2	144176906	144178287	hg19	chr20	17839843	17841338	hs2393	negative	yes
chr2	145888311	145888756	mm9	chr2	145714047	145714492	mm300	negative	yes
chr2	146324701	146325932	hg19	chr20	20472953	20474200	hs688	negative	yes
chr2	146957766	146960813	hg19	chr20	21214790	21217232	hs914	negative	yes
chr2	147180290	147181581	hg19	chr20	21488551	21490021	hs1205	negative	yes
chr2	152399091	152399726	mm9	chr2	152224827	152225462	mm271	negative	yes
chr2	152734877	152735572	hg19	chr20	30191716	30192554	hs480	negative	yes
chr2	152788186	152790967	hg19	chr20	30261538	30264882	hs2050	negative	yes
chr2	152817372	152818197	mm9	chr2	152643108	152643933	mm161	negative	yes
chr2	153481176	153484947	hg19	chr20	31112334	31117114	hs2225	negative	yes
chr2	153560290	153561940	mm9	chr2	153386026	153387676	mm346	negative	yes
chr2	155050090	155052094	mm9	chr2	154875826	154877830	mm59	negative	yes
chr2	155862263	155864147	hg19	chr20	33905955	33908491	hs1630	negative	yes
chr2	156813201	156816143	mm9	chr2	156638937	156641879	mm1377	negative	yes
chr2	158439041	158440388	hg19	chr20	37148390	37149749	hs659	negative	yes
chr2	159032228	159032977	hg19	chr20	37876814	37877600	hs1042	negative	yes
chr2	159712428	159713415	hg19	chr20	38580899	38582010	hs1237	negative	yes
chr2	159985999	159987636	hg19	chr20	38862746	38864025	hs992	negative	yes
chr2	160244493	160245157	mm9	chr2	160070229	160070893	mm645	negative	yes
chr2	160299417	160301134	hg19	chr20	39235779	39237626	hs1781	negative	yes
chr2	160382008	160382874	hg19	chr20	39334182	39335059	hs1086	negative	yes
chr2	160395708	160396677	hg19	chr20	39347264	39348213	hs1234	negative	yes
chr2	160415716	160417232	hg19	chr20	39367240	39368612	hs1590	negative	yes
chr2	160421995	160425459	hg19	chr20	39372456	39375024	hs1591	negative	yes
chr2	160451305	160452587	mm9	chr2	160277041	160278323	mm915	negative	yes
chr2	160492291	160494448	hg19	chr20	39461549	39463625	hs1592	negative	yes
chr2	160503620	160504635	hg19	chr20	39472648	39473702	hs1101	negative	yes
chr2	160513670	160514864	hg19	chr20	39483347	39484593	hs996	negative	yes
chr2	160515694	160517266	mm9	chr2	160341430	160343002	mm923	negative	yes
chr2	160578530	160580585	hg19	chr20	39574314	39576895	hs1593	negative	yes
chr2	163685776	163687192	hg19	chr20	43201171	43202669	hs2373	negative	yes
chr2	165914101	165914771	hg19	chr20	46012576	46013656	hs2380	negative	yes
chr2	166019657	166023462	mm9	chr2	165845157	165848962	mm1346	negative	yes
chr2	166352865	166354821	mm9	chr2	166178365	166180321	mm343	negative	yes
chr2	166440620	166443127	mm9	chr2	166266120	166268627	mm673	positive	yes
chr2	167324556	167326986	hg19	chr20	48291612	48294178	hs2045	negative	yes
chr2	167569881	167571243	mm9	chr2	167395381	167396743	mm368	negative	yes
chr2	167842374	167845654	mm9	chr2	167667874	167671154	mm22	negative	yes
chr2	168049064	168050870	hg19	chr20	49306307	49309162	hs1860	negative	yes
chr2	168693119	168695892	mm9	chr2	168518619	168521392	mm1375	negative	yes
chr2	169599744	169601398	hg19	chr20	51552465	51554077	hs911	negative	yes
chr2	169768393	169769549	hg19	chr20	51736594	51737737	hs610	negative	yes
chr2	170836029	170839441	mm9	chr2	170661529	170664941	mm1402	negative	yes
chr2	171633185	171636816	hg19	chr20	54128635	54130976	hs1492	negative	yes
chr2	171730381	171736633	hg19	chr20	54241646	54244672	hs1448	positive	yes
chr2	172430534	172431364	mm9	chr2	172256034	172256864	mm286	negative	yes
chr2	172861962	172864167	mm9	chr2	172687463	172689668	mm75	negative	yes
chr2	172865097	172865880	hg19	chr20	55734523	55737597	hs1934	negative	yes
chr2	173034798	173036840	mm9	chr2	172860299	172862341	mm92	negative	yes
chr2	173051929	173056057	hg19	chr20	56014710	56019293	hs1971	negative	yes
chr2	174856549	174860580	mm9	chr2	174682050	174686081	mm38	negative	yes
chr3	4376459	4378146	hg19	chr8	76960017	76961714	hs891	negative	yes
chr3	4594085	4596058	hg19	chr8	77141110	77143124	hs1424	negative	yes
chr3	5223534	5226222	hg19	chr8	77598007	77600645	hs1318	negative	yes
chr3	5329674	5330756	hg19	chr8	77690683	77691779	hs774	positive	yes
chr3	5387050	5389713	hg19	chr8	77751553	77754343	hs1681	positive	yes
chr3	5754492	5756119	hg19	chr8	78042571	78044201	hs742	negative	yes
chr3	6181861	6184107	hg19	chr8	78370218	78372418	hs1422	positive	yes
chr3	6886387	6887953	hg19	chr8	79006151	79007727	hs801	negative	yes
chr3	8865055	8867293	hg19	chr8	80874361	80876746	hs1305	negative	yes
chr3	16876170	16878776	hg19	chr8	64564272	64565973	hs1239	negative	yes
chr3	18057876	18058899	hg19	chr8	65496564	65497586	hs223	negative	yes
chr3	18341077	18342204	hg19	chr8	65783977	65785137	hs772	negative	yes
chr3	18378051	18379010	hg19	chr8	65828869	65829844	hs838	negative	yes
chr3	18713569	18714476	hg19	chr8	66148927	66149836	hs303	negative	yes
chr3	20144419	20146014	mm9	chr3	20044305	20045900	mm86	negative	yes
chr3	26001539	26004971	hg19	chr3	173448118	173452132	hs1712	negative	yes
chr3	28420158	28422161	hg19	chr3	171022891	171027653	hs2119	negative	yes
chr3	28429164	28433506	hg19	chr3	171011050	171015963	hs2118	negative	yes
chr3	28438282	28441962	hg19	chr3	170999516	171003506	hs2117	negative	yes
chr3	29979822	29980970	hg19	chr3	168833392	168834540	hs477	negative	yes
chr3	30104532	30109280	hg19	chr3	168958333	168962944	hs1433	positive	yes
chr3	33882396	33883856	hg19	chr3	180436427	180437958	hs258	positive	yes
chr3	33905209	33906178	hg19	chr3	180461825	180462874	hs655	negative	yes
chr3	34103627	34105807	hg19	chr3	180773639	180775802	hs192	negative	yes
chr3	35087536	35089765	hg19	chr3	181958774	181961127	hs1332	negative	yes
chr3	35102311	35103774	mm9	chr3	35001233	35002696	mm639	negative	yes
chr3	35340406	35342017	mm9	chr3	35239328	35240939	mm640	negative	yes
chr3	36158852	36162657	hg19	chr16	31733057	31734604	hs86	negative	yes
chr3	37671699	37674083	hg19	chr4	124383428	124386454	hs1582	negative	yes
chr3	37894700	37898826	hg19	chr4	124775814	124779530	hs1525	positive	yes
chr3	39047259	39049329	hg19	chr4	126439832	126442014	hs1389	negative	yes
chr3	40452073	40454177	hg19	chr4	128406285	128407745	hs2417	negative	yes
chr3	41157758	41159376	hg19	chr4	129278773	129280245	hs2412	negative	yes
chr3	51725540	51729617	hg19	chr4	140682864	140686286	hs1953	negative	yes
chr3	51778044	51779171	mm9	chr3	51581966	51583093	mm472	negative	yes
chr3	51907571	51910645	mm9	chr3	51711493	51714567	mm1388	negative	yes
chr3	52401126	52402130	mm9	chr3	52205048	52206052	mm366	negative	yes
chr3	55753972	55757760	hg19	chr13	36072914	36075972	hs1333	negative	yes
chr3	55964735	55966742	hg19	chr13	35772272	35774420	hs1330	negative	yes
chr3	60602211	60603664	mm9	chr3	60406133	60407586	mm163	negative	yes
chr3	63869819	63872427	mm9	chr3	63673741	63676349	mm1365	negative	yes
chr3	65926996	65930132	hg19	chr3	156845778	156849158	hs2232	negative	yes
chr3	66700787	66701918	hg19	chr3	157589226	157590363	hs638	positive	yes
chr3	66744502	66746109	hg19	chr3	157636456	157638041	hs1409	negative	yes
chr3	66934735	66937240	hg19	chr3	157775742	157778000	hs1251	negative	yes
chr3	67009377	67010623	hg19	chr3	157850874	157852181	hs602	negative	yes
chr3	67036007	67037651	hg19	chr3	157882303	157883963	hs636	positive	yes
chr3	67070295	67071594	hg19	chr3	157903310	157904642	hs741	positive	yes
chr3	67146973	67147795	hg19	chr3	157989611	157990466	hs256	negative	yes
chr3	67170618	67171970	hg19	chr3	158009522	158010836	hs1254	negative	yes
chr3	67190932	67192590	hg19	chr3	158025746	158027384	hs257	negative	yes
chr3	67212684	67213884	hg19	chr3	158085650	158086832	hs1413	positive	yes
chr3	67309670	67310443	hg19	chr3	158201553	158202329	hs832	negative	yes
chr3	67340647	67341402	hg19	chr3	158245851	158246580	hs784	negative	yes
chr3	67550193	67552228	hg19	chr3	158486256	158493372	hs1990	negative	yes
chr3	70311300	70313815	mm9	chr3	70115222	70117737	mm675	negative	yes
chr3	72475819	72479350	hg19	chr3	164170901	164174258	hs1982	negative	yes
chr3	76465722	76469421	mm9	chr3	76269644	76273343	mm1370	negative	yes
chr3	82970875	82971669	hg19	chr4	155580703	155582056	hs1707	negative	yes
chr3	84937098	84939574	hg19	chr4	153287655	153290517	hs1361	negative	yes
chr3	86531948	86532261	hg19	chr4	151520107	151520421	hs1872	negative	yes
chr3	86556609	86557615	hg19	chr4	151493651	151494654	hs657	negative	yes
chr3	86699824	86700906	hg19	chr4	151288357	151289369	hs948	negative	yes
chr3	86849164	86851976	hg19	chr4	151096473	151099299	hs1614	negative	yes
chr3	87982680	87986876	hg19	chr1	156630249	156635284	hs1891	positive	yes
chr3	88138105	88141065	mm9	chr3	87942027	87944987	mm19	negative	yes
chr3	88518217	88523366	hg19	chr1	156065479	156069043	hs2128	negative	yes
chr3	88525859	88528018	hg19	chr1	156059426	156062550	hs2127	negative	yes
chr3	98092572	98095417	mm9	chr3	97896495	97899340	mm1392	negative	yes
chr3	98855051	98855630	mm9	chr3	98658974	98659553	mm250	negative	yes
chr3	99232927	99236556	mm9	chr3	99036850	99040479	mm890	negative	yes
chr3	99259779	99263564	mm9	chr3	99063702	99067487	mm888	negative	yes
chr3	99330607	99331570	hg19	chr1	119452558	119453594	hs499	negative	yes
chr3	99665316	99667145	hg19	chr1	119028026	119029955	hs1428	positive	yes
chr3	100437197	100440090	mm9	chr3	100241120	100244013	mm97	negative	yes
chr3	100482353	100482938	mm9	chr3	100286276	100286861	mm164	negative	yes
chr3	102062054	102063652	mm9	chr3	101865977	101867575	mm93	negative	yes
chr3	104596935	104600599	mm9	chr3	104400858	104404522	mm143	negative	yes
chr3	108389934	108392442	hg19	chr1	109816874	109818905	hs2263	negative	yes
chr3	108409603	108412500	hg19	chr1	109795696	109798850	hs2216	negative	yes
chr3	119361442	119362694	hg19	chr1	97610491	97611741	hs671	negative	yes
chr3	121735097	121737629	mm9	chr3	121438015	121440547	mm1327	negative	yes
chr3	121953542	121954391	mm9	chr3	121656460	121657309	mm434	negative	yes
chr3	122032210	122035024	mm9	chr3	121735128	121737942	mm1360	negative	yes
chr3	122047471	122049247	mm9	chr3	121750389	121752165	mm435	negative	yes
chr3	122292915	122294267	mm9	chr3	121995833	121997185	mm436	negative	yes
chr3	127626842	127627905	hg19	chr4	113442390	113443530	hs981	negative	yes
chr3	127913726	127915301	mm9	chr3	127616644	127618219	mm929	negative	yes
chr3	128230116	128231767	hg19	chr4	112668302	112669915	hs926	negative	yes
chr3	128343087	128344790	hg19	chr4	112556474	112558292	hs928	negative	yes
chr3	128450191	128451286	hg19	chr4	112421802	112422905	hs559	negative	yes
chr3	128518773	128521316	mm9	chr3	128221691	128224234	mm930	negative	yes
chr3	128668527	128670001	hg19	chr4	112130976	112132385	hs931	negative	yes
chr3	128719111	128720732	hg19	chr4	112035956	112037560	hs927	negative	yes
chr3	128849320	128852008	hg19	chr4	111914861	111917609	hs424	negative	yes
chr3	128925922	128927117	hg19	chr4	111834455	111835732	hs929	negative	yes
chr3	129103806	129105710	hg19	chr4	111669259	111671168	hs930	negative	yes
chr3	129178433	129178935	hg19	chr4	111578273	111578827	hs500	negative	yes
chr3	129227195	129227767	hg19	chr4	111530174	111530773	hs507	negative	yes
chr3	130439552	130441737	hg19	chr4	109893210	109895294	hs2021	negative	yes
chr3	130737081	130738563	hg19	chr4	109531908	109533465	hs1050	negative	yes
chr3	130961755	130964427	hg19	chr4	109254340	109257033	hs1545	negative	yes
chr3	131136338	131137858	hg19	chr4	109062224	109063783	hs918	negative	yes
chr3	134302378	134303703	hg19	chr4	105345575	105346895	hs260	negative	yes
chr3	137783219	137786437	mm9	chr3	137446183	137449401	mm4	negative	yes
chr3	138742669	138745155	hg19	chr4	99576760	99579288	hs2086	negative	yes
chr3	141111699	141113451	hg19	chr4	96878170	96879875	hs1691	negative	yes
chr3	142237412	142239504	hg19	chr4	95589445	95591459	hs1438	positive	yes
chr3	143100892	143102627	hg19	chr1	88926796	88928508	hs327	negative	yes
chr3	143160907	143162289	hg19	chr1	88841735	88843091	hs1068	negative	yes
chr3	143332585	143334248	hg19	chr1	88686076	88687740	hs1107	negative	yes
chr3	143377757	143379148	hg19	chr1	88646698	88648145	hs1216	negative	yes
chr3	143411019	143412241	hg19	chr1	88615687	88616927	hs878	positive	yes
chr3	143433866	143435040	hg19	chr1	88595049	88596320	hs1135	negative	yes
chr3	143454150	143455385	hg19	chr1	88577535	88578821	hs1200	negative	yes
chr3	143496223	143498959	hg19	chr1	88535719	88538390	hs1198	negative	yes
chr3	143613891	143615871	hg19	chr1	88402821	88404888	hs1055	negative	yes
chr3	143822295	143823649	hg19	chr1	88183654	88184961	hs1058	negative	yes
chr3	143913931	143915289	hg19	chr1	88108084	88109396	hs1002	negative	yes
chr3	143946947	143948486	hg19	chr1	88065041	88066530	hs1217	negative	yes
chr3	143982652	143983372	hg19	chr1	88028658	88029378	hs323	negative	yes
chr3	143985056	143986395	hg19	chr1	88025863	88027203	hs1161	negative	yes
chr3	144173689	144175124	hg19	chr1	87821621	87823082	hs174	positive	yes
chr3	144194510	144196428	hg19	chr1	87803415	87805212	hs1134	negative	yes
chr3	144203014	144204546	hg19	chr1	87795192	87796737	hs809	negative	yes
chr3	145964099	145964929	mm9	chr3	145627063	145627893	mm311	negative	yes
chr3	147443794	147444828	hg19	chr1	83878319	83879217	hs445	negative	yes
chr3	147862342	147863082	hg19	chr1	83411289	83412040	hs444	negative	yes
chr3	147918639	147919411	hg19	chr1	83360512	83361298	hs443	negative	yes
chr3	147930416	147931323	hg19	chr1	83345366	83346271	hs442	negative	yes
chr3	147965989	147967091	hg19	chr1	83310680	83311769	hs441	negative	yes
chr3	148032366	148033372	hg19	chr1	83252219	83253218	hs440	negative	yes
chr3	148060567	148061230	hg19	chr1	83220709	83221363	hs439	negative	yes
chr3	148588610	148589434	hg19	chr1	82664608	82665419	hs438	negative	yes
chr3	148589815	148590455	hg19	chr1	82663553	82664196	hs437	negative	yes
chr3	148699788	148700480	hg19	chr1	82557436	82558140	hs436	negative	yes
chr3	151383191	151390026	hg19	chr1	79541347	79549134	hs1989	positive	yes
chr3	152303123	152305850	mm9	chr3	151966087	151968814	mm72	negative	yes
chr4	5796827	5800336	mm9	chr4	5723974	5727483	mm718	negative	yes
chr4	5962014	5963794	hg19	chr8	59168210	59170121	hs1364	negative	yes
chr4	6745236	6747592	hg19	chr8	59769794	59772587	hs2029	negative	yes
chr4	6912470	6914779	hg19	chr8	59941214	59943636	hs1326	negative	yes
chr4	7567408	7568542	hg19	chr8	60543031	60544205	hs756	negative	yes
chr4	13786475	13789661	hg19	chr8	93070697	93073395	hs1599	positive	yes
chr4	13831424	13834052	hg19	chr8	93030368	93033345	hs1658	negative	yes
chr4	14024601	14026426	hg19	chr8	92824759	92826618	hs669	negative	yes
chr4	14272133	14278418	hg19	chr8	92609272	92613421	hs1601	negative	yes
chr4	22300833	22303031	hg19	chr6	99424724	99426847	hs530	negative	yes
chr4	22835084	22836758	hg19	chr6	99089361	99091043	hs1085	negative	yes
chr4	22927135	22928714	hg19	chr6	99005894	99007499	hs1014	negative	yes
chr4	22946232	22947173	hg19	chr6	98995483	98996450	hs290	negative	yes
chr4	23049134	23051887	hg19	chr6	98902034	98904516	hs1081	negative	yes
chr4	23145545	23147653	hg19	chr6	98831075	98833042	hs1159	negative	yes
chr4	23147679	23148836	hg19	chr6	98829860	98831049	hs1128	negative	yes
chr4	23172986	23174321	hg19	chr6	98813608	98814940	hs288	negative	yes
chr4	23341021	23341757	hg19	chr6	98719759	98720510	hs284	negative	yes
chr4	23504398	23505744	hg19	chr6	98572398	98573780	hs1106	negative	yes
chr4	23590043	23592040	hg19	chr6	98504034	98506058	hs1233	negative	yes
chr4	23601772	23603173	hg19	chr6	98491829	98493238	hs563	negative	yes
chr4	23636062	23637409	hg19	chr6	98461952	98463309	hs567	negative	yes
chr4	23713406	23714931	hg19	chr6	98382462	98383929	hs985	negative	yes
chr4	23731837	23733245	hg19	chr6	98362399	98363804	hs283	negative	yes
chr4	23810470	23812145	hg19	chr6	98278782	98280694	hs995	negative	yes
chr4	23831528	23833072	hg19	chr6	98261649	98263117	hs1054	negative	yes
chr4	23869809	23871832	hg19	chr6	98212329	98214701	hs1220	negative	yes
chr4	23983453	23984308	hg19	chr6	98116085	98116943	hs282	negative	yes
chr4	24018818	24020246	hg19	chr6	98074091	98075722	hs1035	positive	yes
chr4	24151153	24152087	hg19	chr6	97948958	97949898	hs1059	negative	yes
chr4	24212231	24215244	hg19	chr6	97912825	97915982	hs1564	negative	yes
chr4	24216914	24220803	mm9	chr4	24144061	24147950	mm1345	negative	yes
chr4	24428854	24430298	hg19	chr6	97754043	97755513	hs978	negative	yes
chr4	24669207	24670331	hg19	chr6	97544611	97545759	hs676	negative	yes
chr4	28862693	28863921	hg19	chr6	94074618	94075791	hs1737	negative	yes
chr4	32301903	32305410	mm9	chr4	32388878	32392385	mm720	negative	yes
chr4	44830265	44831018	hg19	chr9	37215016	37215775	hs310	negative	yes
chr4	44851630	44852605	hg19	chr9	37251207	37252223	hs901	negative	yes
chr4	44917363	44918981	hg19	chr9	37336630	37338306	hs620	negative	yes
chr4	45505842	45507105	hg19	chr9	38038695	38040099	hs2062	negative	yes
chr4	45828456	45831469	hg19	chr9	38425496	38429775	hs1390	positive	yes
chr4	46352102	46353592	hg19	chr9	100624863	100626679	hs1596	negative	yes
chr4	46366954	46371362	hg19	chr9	100636218	100640509	hs1717	negative	yes
chr4	54469466	54472653	hg19	chr9	109181334	109184572	hs1606	negative	yes
chr4	54611226	54614736	mm9	chr4	54624098	54627608	mm814	negative	yes
chr4	54651392	54653981	hg19	chr9	109382587	109385126	hs1398	negative	yes
chr4	57536400	57540225	mm9	chr4	57549272	57553097	mm1344	negative	yes
chr4	57845561	57847767	mm9	chr4	57858433	57860639	mm261	negative	yes
chr4	58666632	58672430	hg19	chr9	113923350	113928045	hs1447	positive	yes
chr4	62611143	62615332	mm9	chr4	62272177	62276366	mm1311	negative	yes
chr4	63056998	63058386	hg19	chr9	116726436	116727813	hs641	positive	yes
chr4	64437751	64439209	hg19	chr9	118227846	118230333	hs1625	negative	yes
chr4	65237235	65239737	mm9	chr4	64898269	64900771	mm774	negative	yes
chr4	66894392	66895290	mm9	chr4	66555426	66556324	mm279	negative	yes
chr4	70810017	70811660	hg19	chr9	83122286	83123599	hs1211	negative	yes
chr4	71130904	71132135	hg19	chr9	83412700	83413972	hs974	negative	yes
chr4	71466276	71467327	hg19	chr9	83711693	83712782	hs1228	negative	yes
chr4	71483744	71484988	hg19	chr9	83727123	83728378	hs240	negative	yes
chr4	71839683	71841070	hg19	chr9	84009516	84010866	hs722	negative	yes
chr4	72068926	72069840	hg19	chr9	84167351	84168176	hs1118	negative	yes
chr4	72166327	72168960	hg19	chr9	84264195	84266950	hs1359	negative	yes
chr4	72196487	72197365	hg19	chr9	84299210	84300117	hs556	negative	yes
chr4	72381989	72383115	hg19	chr9	84438198	84439339	hs583	negative	yes
chr4	72766130	72767260	hg19	chr9	84946893	84948036	hs752	negative	yes
chr4	72799662	72800540	hg19	chr9	84978274	84979131	hs800	negative	yes
chr4	73488434	73489492	hg19	chr9	85509632	85510687	hs618	negative	yes
chr4	75700793	75701396	hg19	chr9	8095553	8096166	hs304	negative	yes
chr4	76327004	76328750	hg19	chr9	8736481	8738586	hs1744	negative	yes
chr4	81468204	81471011	hg19	chr9	13314075	13315963	hs1986	negative	yes
chr4	81960417	81961865	hg19	chr9	13750115	13751398	hs852	negative	yes
chr4	82153582	82154380	hg19	chr9	13939547	13940363	hs305	positive	yes
chr4	82915373	82918271	mm9	chr4	82561277	82564175	mm56	negative	yes
chr4	83794853	83795171	hg19	chr9	15874184	15874505	hs306	negative	yes
chr4	84529017	84529746	hg19	chr9	16710536	16711184	hs307	negative	yes
chr4	84986009	84988497	hg19	chr9	17322200	17324371	hs529	negative	yes
chr4	84995828	84996432	hg19	chr9	17331971	17332580	hs308	negative	yes
chr4	89388208	89393783	mm9	chr4	89054899	89060474	mm371	negative	yes
chr4	89399831	89406701	mm9	chr4	89066522	89073392	mm373	negative	yes
chr4	89410605	89417157	mm9	chr4	89077296	89083848	mm375	negative	yes
chr4	89421046	89425353	mm9	chr4	89087737	89092044	mm468	negative	yes
chr4	89426411	89429104	mm9	chr4	89093102	89095795	mm10	negative	yes
chr4	89431159	89434211	hg19	chr9	22106994	22109800	hs1521	negative	yes
chr4	89439184	89446556	mm9	chr4	89105875	89113247	mm379	negative	yes
chr4	89452132	89455541	mm9	chr4	89118823	89122232	mm381	negative	yes
chr4	89457897	89460037	hg19	chr9	22127677	22130448	hs1695	negative	yes
chr4	89468919	89471433	mm9	chr4	89135610	89138124	mm677	negative	yes
chr4	90437298	90438340	hg19	chr9	23004730	23005789	hs643	negative	yes
chr4	91027482	91028588	hg19	chr9	23496285	23497394	hs309	negative	yes
chr4	95317405	95319020	hg19	chr1	59522325	59524092	hs1485	positive	yes
chr4	95821064	95823802	hg19	chr1	60102624	60105491	hs1609	negative	yes
chr4	97377585	97378602	hg19	chr1	61086857	61087871	hs683	negative	yes
chr4	97647212	97651215	mm9	chr4	97313903	97317906	mm1308	negative	yes
chr4	98107609	98110094	hg19	chr1	61917795	61920190	hs1309	positive	yes
chr4	98221540	98224627	hg19	chr1	62045460	62048159	hs1484	positive	yes
chr4	98242382	98245050	hg19	chr1	62053433	62055908	hs1450	negative	yes
chr4	99294411	99295982	hg19	chr1	63369349	63370894	hs311	negative	yes
chr4	99353164	99354624	hg19	chr1	63443534	63444884	hs168	negative	yes
chr4	99374142	99375600	hg19	chr1	63464282	63465717	hs169	negative	yes
chr4	99573882	99574766	hg19	chr1	63665219	63666122	hs764	negative	yes
chr4	105427474	105428608	mm9	chr4	105100079	105101213	mm1174	negative	yes
chr4	105860014	105863947	hg19	chr1	56240104	56242435	hs1622	positive	yes
chr4	106864212	106867561	hg19	chr1	54925046	54928826	hs1487	positive	yes
chr4	107602048	107604613	mm9	chr4	107274653	107277218	mm330	negative	yes
chr4	109762245	109763772	hg19	chr1	51165195	51166786	hs200	positive	yes
chr4	109805980	109807023	hg19	chr1	51098841	51099913	hs197	negative	yes
chr4	109858712	109860444	hg19	chr1	51034546	51036289	hs194	negative	yes
chr4	109882014	109883288	hg19	chr1	51006090	51007314	hs247	negative	yes
chr4	111552852	111553447	hg19	chr1	49112757	49113363	hs295	negative	yes
chr4	117390983	117392315	hg19	chr1	44989824	44991149	hs280	positive	yes
chr4	117646907	117647611	hg19	chr1	44715420	44716129	hs277	negative	yes
chr4	117828715	117831600	hg19	chr1	44500383	44503337	hs1857	negative	yes
chr4	119019151	119020076	mm9	chr4	118691756	118692681	mm165	negative	yes
chr4	119238785	119240197	mm9	chr4	118911390	118912802	mm586	negative	yes
chr4	120391668	120396254	hg19	chr1	41710596	41712937	hs1674	negative	yes
chr4	123604867	123607516	hg19	chr1	39629409	39631707	hs1999	negative	yes
chr4	123948793	123949704	hg19	chr1	39291500	39292441	hs850	negative	yes
chr4	123990361	123991796	hg19	chr1	39248757	39250129	hs1139	negative	yes
chr4	124035338	124036862	hg19	chr1	39192609	39194134	hs1031	negative	yes
chr4	124359245	124361243	hg19	chr1	38835996	38838106	hs1546	negative	yes
chr4	124375082	124376310	hg19	chr1	38819171	38820577	hs1045	negative	yes
chr4	124395350	124396098	hg19	chr1	38801888	38802630	hs270	negative	yes
chr4	124401703	124403018	hg19	chr1	38791998	38793333	hs1098	negative	yes
chr4	124455078	124456356	hg19	chr1	38735942	38737376	hs1008	negative	yes
chr4	124458302	124460392	hg19	chr1	38728185	38732516	hs2088	negative	yes
chr4	124477457	124479255	hg19	chr1	38712075	38713517	hs1001	negative	yes
chr4	124520132	124521366	hg19	chr1	38662809	38664040	hs790	negative	yes
chr4	124526301	124527139	hg19	chr1	38656780	38657626	hs1179	negative	yes
chr4	124551047	124552186	hg19	chr1	38627529	38629265	hs1124	negative	yes
chr4	124615409	124616813	hg19	chr1	38560194	38561606	hs238	negative	yes
chr4	124671950	124672944	hg19	chr1	38494689	38495688	hs1105	negative	yes
chr4	128714852	128716971	hg19	chr1	33828789	33830947	hs1388	negative	yes
chr4	128804347	128805790	hg19	chr1	33722494	33723960	hs917	negative	yes
chr4	129713467	129714338	hg19	chr1	32510030	32510913	hs645	negative	yes
chr4	131483172	131485713	mm9	chr4	131039087	131041628	mm1297	negative	yes
chr4	132032113	132036152	mm9	chr4	131588028	131592067	mm1387	negative	yes
chr4	132075516	132079227	mm9	chr4	131631431	131635142	mm80	negative	yes
chr4	133116592	133118424	mm9	chr4	132672507	132674339	mm334	negative	yes
chr4	133729052	133730306	hg19	chr1	27049620	27050905	hs569	negative	yes
chr4	134470100	134473977	hg19	chr12	31867650	31868817	hs2043	negative	yes
chr4	135205845	135207207	mm9	chr4	134761760	134763122	mm23	negative	yes
chr4	135256966	135260789	mm9	chr4	134812881	134816704	mm1332	negative	yes
chr4	139830775	139832379	hg19	chr1	18958671	18960284	hs1702	negative	yes
chr4	140010918	140012273	mm9	chr4	139566833	139568188	mm484	negative	yes
chr4	140218145	140219643	mm9	chr4	139774060	139775558	mm8	negative	yes
chr4	141536761	141537859	mm9	chr4	141092676	141093774	mm316	negative	yes
chr4	147965245	147970361	hg19	chr1	11940877	11944112	hs2124	negative	yes
chr4	148708125	148709197	hg19	chr1	10965129	10966144	hs241	negative	yes
chr4	148744315	148744862	hg19	chr1	10925202	10925728	hs417	negative	yes
chr4	148808782	148809417	hg19	chr1	10851570	10852173	hs408	negative	yes
chr4	148855953	148860332	hg19	chr1	10795106	10799241	hs2094	negative	yes
chr4	148876109	148876660	hg19	chr1	10781239	10781744	hs389	negative	yes
chr4	148897229	148898219	hg19	chr1	10757664	10758631	hs361	negative	yes
chr4	148921505	148922573	hg19	chr1	10732070	10733118	hs289	negative	yes
chr4	149044050	149045134	hg19	chr1	10593123	10594209	hs677	negative	yes
chr4	149892946	149894331	hg19	chr1	9431127	9432834	hs1615	negative	yes
chr4	150824121	150825979	hg19	chr1	8130439	8131887	hs1833	positive	yes
chr4	154393163	154397126	hg19	chr1	3262093	3266365	hs1912	negative	yes
chr4	154456295	154457168	hg19	chr1	3190581	3191428	hs705	negative	yes
chr4	154771105	154772345	mm9	chr4	154145214	154146454	mm1088	positive	yes
chr4	155234679	155236167	mm9	chr4	154608788	154610276	mm318	negative	yes
chr5	4833236	4835698	hg19	chr7	90797871	90800712	hs1631	negative	yes
chr5	4856664	4859896	hg19	chr7	90777214	90780836	hs1633	negative	yes
chr5	4875241	4879651	hg19	chr7	90753895	90758080	hs1627	positive	yes
chr5	5007239	5009906	mm9	chr5	5007239	5009906	mm49	negative	yes
chr5	12505539	12509076	mm9	chr5	12505539	12509076	mm832	negative	yes
chr5	15966035	15967426	hg19	chr7	82039621	82041108	hs2419	positive	yes
chr5	20079132	20082788	mm9	chr5	19584950	19588606	mm43	negative	yes
chr5	20493774	20494889	mm9	chr5	19999592	20000707	mm389	negative	yes
chr5	20950023	20950986	mm9	chr5	20455841	20456804	mm390	negative	yes
chr5	21495900	21497355	mm9	chr5	21001718	21003173	mm391	negative	yes
chr5	24341638	24345757	hg19	chr7	150665549	150670065	hs1908	negative	yes
chr5	24730554	24731843	mm9	chr5	24236372	24237661	mm394	negative	yes
chr5	25000813	25002636	hg19	chr7	151439778	151443512	hs2198	negative	yes
chr5	25008595	25011541	hg19	chr7	151453949	151457105	hs2200	negative	yes
chr5	28178923	28180422	hg19	chr7	155264047	155265809	hs1418	negative	yes
chr5	28403755	28404882	hg19	chr7	155547616	155548788	hs1268	positive	yes
chr5	30614016	30616922	hg19	chr2	26942649	26946100	hs1885	negative	yes
chr5	32065704	32067172	mm9	chr5	32368077	32369545	mm135	negative	yes
chr5	33575294	33575875	hg19	chr4	1613479	1614106	hs526	negative	yes
chr5	37818652	37819645	mm9	chr5	38209891	38210884	mm425	negative	yes
chr5	37825669	37829220	mm9	chr5	38216908	38220459	mm426	positive	yes
chr5	37851392	37852219	hg19	chr4	4819733	4820560	hs171	negative	yes
chr5	37901106	37902493	mm9	chr5	38292345	38293732	mm427	negative	yes
chr5	37917742	37918594	mm9	chr5	38308981	38309833	mm428	positive	yes
chr5	37967623	37969196	mm9	chr5	38358862	38360435	mm429	positive	yes
chr5	38060248	38061422	hg19	chr4	4522867	4524050	hs746	negative	yes
chr5	38065055	38066694	mm9	chr5	38456294	38457933	mm928	negative	yes
chr5	38106177	38106996	hg19	chr4	4458793	4459656	hs2303	negative	yes
chr5	38509268	38509899	mm9	chr5	38900507	38901138	mm253	negative	yes
chr5	41165316	41166973	hg19	chr4	12899030	12900803	hs1248	negative	yes
chr5	41199107	41200708	hg19	chr4	12950899	12952450	hs1249	negative	yes
chr5	41261421	41262403	hg19	chr4	13009318	13010327	hs259	positive	yes
chr5	41380511	41381341	hg19	chr4	13126482	13127376	hs1250	negative	yes
chr5	41737620	41739298	hg19	chr4	13517497	13519167	hs916	negative	yes
chr5	42522949	42524031	hg19	chr4	14268833	14269924	hs842	negative	yes
chr5	51591179	51592760	hg19	chr4	23932061	23933692	hs2346	negative	yes
chr5	55976101	55977173	hg19	chr4	28892552	28893688	hs601	negative	yes
chr5	67423706	67424669	hg19	chr4	42150091	42151064	hs847	negative	yes
chr5	72493823	72495406	hg19	chr4	47826466	47828052	hs2414	negative	yes
chr5	74265657	74268205	hg19	chr4	53823605	53826463	hs1509	negative	yes
chr5	74361294	74363523	hg19	chr4	53942283	53944297	hs1668	negative	yes
chr5	74431979	74435797	hg19	chr4	54061474	54065280	hs1460	negative	yes
chr5	75012461	75013668	hg19	chr4	54881222	54882455	hs687	negative	yes
chr5	75071388	75072201	hg19	chr4	54961998	54962796	hs678	negative	yes
chr5	76662343	76666797	hg19	chr4	56919589	56923793	hs1651	negative	yes
chr5	77129880	77130993	mm9	chr5	77558905	77560018	mm770	negative	yes
chr5	77486940	77489925	mm9	chr5	77915965	77918950	mm1340	positive	yes
chr5	78283386	78285475	mm9	chr5	78712411	78714500	mm34	negative	yes
chr5	84811330	84812261	hg19	chr4	66989480	66990366	hs840	negative	yes
chr5	92627753	92628377	mm9	chr5	93056779	93057403	mm187	negative	yes
chr5	92997267	92998294	mm9	chr5	93426293	93427320	mm397	positive	yes
chr5	93131077	93135726	mm9	chr5	93560103	93564752	mm39	negative	yes
chr5	97542962	97543765	hg19	chr4	80426144	80427098	hs1241	negative	yes
chr5	97546822	97547439	hg19	chr4	80430584	80431224	hs1240	negative	yes
chr5	99272413	99275239	mm9	chr5	99701432	99704258	mm1398	negative	yes
chr5	99367893	99370406	mm9	chr5	99796912	99799425	mm678	positive	yes
chr5	101031954	101033223	hg19	chr4	84700011	84701265	hs712	negative	yes
chr5	101496956	101497906	hg19	chr4	85245591	85246555	hs680	negative	yes
chr5	101966725	101970386	mm9	chr5	102395744	102399405	mm1356	negative	yes
chr5	102373255	102375763	mm9	chr5	102802274	102804782	mm680	positive	yes
chr5	106564330	106566018	hg19	chr1	91305562	91307215	hs612	negative	yes
chr5	107221760	107224214	hg19	chr1	92271540	92273987	hs1499	negative	yes
chr5	107250899	107252442	hg19	chr1	92310736	92312231	hs2418	negative	yes
chr5	110898210	110898771	mm9	chr5	111327229	111327790	mm619	negative	yes
chr5	111054483	111055797	hg19	chr22	28746697	28748395	hs1645	negative	yes
chr5	111255885	111257844	mm9	chr5	111684904	111686863	mm920	negative	yes
chr5	111394041	111395158	hg19	chr22	28238313	28239718	hs1271	positive	yes
chr5	111535893	111537132	hg19	chr22	28028233	28029715	hs2415	negative	yes
chr5	111577305	111578296	mm9	chr5	112006325	112007316	mm621	negative	yes
chr5	111601262	111602739	mm9	chr5	112030282	112031759	mm622	negative	yes
chr5	111675073	111676405	mm9	chr5	112104093	112105425	mm921	negative	yes
chr5	113151952	113154228	mm9	chr5	113580972	113583248	mm329	positive	yes
chr5	115266986	115267561	mm9	chr5	115716995	115717570	mm307	negative	yes
chr5	115488390	115491906	mm9	chr5	115938399	115941915	mm723	negative	yes
chr5	118665477	118668878	mm9	chr5	119115486	119118887	mm1366	negative	yes
chr5	119610925	119613436	mm9	chr5	120060934	120063445	mm1177	positive	yes
chr5	119667994	119668856	hg19	chr12	115124394	115125300	hs483	positive	yes
chr5	119668987	119669582	hg19	chr12	115123533	115124174	hs482	negative	yes
chr5	119795903	119797675	mm9	chr5	120245912	120247684	mm1282	negative	yes
chr5	119821983	119824240	mm9	chr5	120271992	120274249	mm370	negative	yes
chr5	119976562	119977191	hg19	chr12	114660367	114661006	hs498	negative	yes
chr5	120135778	120136934	mm9	chr5	120585787	120586943	mm144	negative	yes
chr5	120287383	120288927	hg19	chr12	114101195	114103805	hs1571	negative	yes
chr5	121925608	121927679	mm9	chr5	122375617	122377688	mm911	negative	yes
chr5	122032503	122033356	hg19	chr12	111495397	111496252	hs611	negative	yes
chr5	122092218	122094768	mm9	chr5	122542227	122544777	mm77	negative	yes
chr5	124171521	124176494	hg19	chr12	123546924	123551725	hs1973	negative	yes
chr5	131580380	131582372	hg19	chr7	70103123	70104331	hs925	positive	yes
chr5	131693648	131694371	hg19	chr7	69980613	69981299	hs833	negative	yes
chr5	131780893	131781638	hg19	chr7	69891243	69892028	hs846	negative	yes
chr5	131794315	131795265	hg19	chr7	69881761	69882691	hs827	negative	yes
chr5	131919678	131921484	hg19	chr7	69731835	69734096	hs2318	negative	yes
chr5	131929775	131931745	hg19	chr7	69720457	69721867	hs2317	negative	yes
chr5	131948446	131949774	hg19	chr7	69702231	69703615	hs658	negative	yes
chr5	131990290	131991735	hg19	chr7	69646374	69649029	hs2316	negative	yes
chr5	132032772	132035461	hg19	chr7	69596979	69598263	hs1425	negative	yes
chr5	132228612	132230350	hg19	chr7	69399070	69400682	hs1660	negative	yes
chr5	132293079	132295164	hg19	chr7	69325868	69327684	hs2315	negative	yes
chr5	139536245	139537428	hg19	chr7	1265154	1266318	hs293	negative	yes
chr5	139538772	139540184	hg19	chr7	1267832	1269169	hs173	negative	yes
chr5	147155041	147156530	hg19	chr13	28318579	28320134	hs1568	negative	yes
chr5	147222660	147224221	hg19	chr13	28395961	28397536	hs532	negative	yes
chr5	149320224	149322610	hg19	chr13	31364918	31367891	hs1515	negative	yes
chr6	3509886	3514285	mm9	chr6	3459886	3464285	mm801	negative	yes
chr6	4456170	4459324	hg19	chr7	93975962	93978880	hs1626	negative	yes
chr6	4483463	4485322	mm9	chr6	4433463	4435322	mm398	positive	yes
chr6	4488993	4490635	mm9	chr6	4438993	4440635	mm399	negative	yes
chr6	4553537	4555066	mm9	chr6	4503537	4505066	mm400	positive	yes
chr6	5507996	5512142	hg19	chr7	95236622	95240458	hs1831	negative	yes
chr6	5997407	5997858	hg19	chr7	95696530	95697029	hs2314	negative	yes
chr6	6005995	6006609	hg19	chr7	95705089	95705696	hs2308	positive	yes
chr6	6026899	6028252	hg19	chr7	95726279	95727680	hs2309	positive	yes
chr6	6058480	6059027	hg19	chr7	95765880	95766473	hs2313	positive	yes
chr6	6161772	6164755	hg19	chr7	95874847	95878101	hs1642	negative	yes
chr6	6316533	6317120	hg19	chr7	96075405	96075991	hs2312	negative	yes
chr6	6363941	6364446	hg19	chr7	96124918	96125415	hs2311	negative	yes
chr6	6458809	6459379	hg19	chr7	96221075	96221574	hs2310	negative	yes
chr6	6861655	6862377	hg19	chr7	96633582	96634303	hs298	negative	yes
chr6	9834715	9835886	hg19	chr7	9271308	9272358	hs799	negative	yes
chr6	11534744	11535814	hg19	chr7	10684318	10685359	hs793	negative	yes
chr6	14754338	14755302	hg19	chr7	113558123	113559105	hs1876	negative	yes
chr6	14980242	14981244	hg19	chr7	113793545	113794562	hs720	negative	yes
chr6	15182428	15183744	hg19	chr7	114052100	114053403	hs1069	negative	yes
chr6	15185821	15187224	hg19	chr7	114055419	114056748	hs1167	negative	yes
chr6	15187323	15189118	hg19	chr7	114056847	114058647	hs218	negative	yes
chr6	15192947	15194270	hg19	chr7	114062615	114063919	hs219	negative	yes
chr6	15201156	15203663	hg19	chr7	114070779	114073266	hs220	negative	yes
chr6	15257106	15258522	hg19	chr7	114142132	114143527	hs999	negative	yes
chr6	15322791	15324149	hg19	chr7	114208952	114210310	hs221	negative	yes
chr6	15368271	15370231	hg19	chr7	114261073	114263089	hs1080	negative	yes
chr6	15399348	15401975	hg19	chr7	114287987	114290557	hs954	negative	yes
chr6	15404452	15405550	hg19	chr7	114292900	114293972	hs1215	negative	yes
chr6	15406720	15407971	hg19	chr7	114295109	114296373	hs222	negative	yes
chr6	15411326	15413759	hg19	chr7	114299711	114302078	hs956	negative	yes
chr6	15435024	15437812	hg19	chr7	114326912	114329772	hs966	negative	yes
chr6	15486410	15487741	hg19	chr7	114381553	114382837	hs785	negative	yes
chr6	15500356	15501750	hg19	chr7	114395170	114396591	hs792	negative	yes
chr6	15610145	15610753	hg19	chr7	114463797	114464462	hs1192	negative	yes
chr6	16313991	16314934	hg19	chr7	115113551	115114543	hs684	negative	yes
chr6	16315852	16317823	hg19	chr7	115115427	115117325	hs299	negative	yes
chr6	16332591	16334210	hg19	chr7	115133829	115135428	hs300	negative	yes
chr6	16482618	16484681	hg19	chr7	115262750	115264769	hs861	negative	yes
chr6	16530409	16531733	hg19	chr7	115295267	115296597	hs738	negative	yes
chr6	16547563	16549382	hg19	chr7	115313238	115315056	hs190	negative	yes
chr6	16725956	16729599	hg19	chr7	115451531	115454796	hs1798	negative	yes
chr6	16835376	16835875	hg19	chr7	115582121	115582622	hs301	negative	yes
chr6	17170073	17174875	hg19	chr7	115993663	115997109	hs2071	negative	yes
chr6	21878022	21880817	hg19	chr7	120536767	120540791	hs1988	negative	yes
chr6	23271299	23275344	hg19	chr7	121967528	121971078	hs1809	negative	yes
chr6	28395025	28398247	hg19	chr7	127174386	127177546	hs1308	negative	yes
chr6	30635908	30637351	hg19	chr7	130012949	130014460	hs2387	negative	yes
chr6	35353329	35355339	hg19	chr7	135456908	135459236	hs1508	negative	yes
chr6	35631496	35636352	hg19	chr7	135742628	135745716	hs2077	negative	yes
chr6	39239850	39243498	hg19	chr7	139910588	139914247	hs2082	negative	yes
chr6	39541755	39546349	mm9	chr6	39491754	39496348	mm1321	negative	yes
chr6	47203069	47205158	hg19	chr7	147972273	147975381	hs2258	negative	yes
chr6	50336190	50338926	mm9	chr6	50286189	50288925	mm1383	negative	yes
chr6	50354039	50357303	mm9	chr6	50304038	50307302	mm1318	negative	yes
chr6	50810700	50811821	mm9	chr6	50760699	50761820	mm401	negative	yes
chr6	50821119	50823589	mm9	chr6	50771118	50773588	mm402	negative	yes
chr6	50889579	50892588	hg19	chr7	25533607	25536880	hs1677	negative	yes
chr6	50924548	50926237	mm9	chr6	50874547	50876236	mm403	negative	yes
chr6	50956956	50958238	mm9	chr6	50906955	50908237	mm404	negative	yes
chr6	50981071	50982330	mm9	chr6	50931070	50932329	mm405	negative	yes
chr6	50983967	50984810	mm9	chr6	50933966	50934809	mm406	positive	yes
chr6	51001488	51004105	hg19	chr7	25695037	25697616	hs1600	positive	yes
chr6	51051772	51053273	mm9	chr6	51001771	51003272	mm407	positive	yes
chr6	51076186	51078598	hg19	chr7	25791903	25794282	hs1325	negative	yes
chr6	51104235	51105195	mm9	chr6	51054234	51055194	mm408	negative	yes
chr6	51172427	51173473	mm9	chr6	51122426	51123472	mm409	negative	yes
chr6	51194713	51198223	hg19	chr7	25919000	25922541	hs1465	positive	yes
chr6	51333774	51334476	mm9	chr6	51283773	51284475	mm410	negative	yes
chr6	51361843	51362696	mm9	chr6	51311842	51312695	mm411	negative	yes
chr6	51708576	51709543	hg19	chr7	26524662	26525636	hs769	negative	yes
chr6	51857235	51858614	mm9	chr6	51807234	51808613	mm412	negative	yes
chr6	51878612	51879694	hg19	chr7	26728697	26729802	hs296	negative	yes
chr6	52178169	52178777	hg19	chr7	27156051	27156664	hs1703	negative	yes
chr6	52270433	52271615	hg19	chr7	27249858	27251057	hs501	negative	yes
chr6	52319082	52320287	hg19	chr7	27288268	27289491	hs629	negative	yes
chr6	52442617	52444529	mm9	chr6	52392611	52394523	mm48	positive	yes
chr6	52967026	52969651	hg19	chr7	28114903	28117771	hs1430	positive	yes
chr6	53468299	53472380	hg19	chr7	28630662	28634883	hs1604	positive	yes
chr6	55703699	55704797	hg19	chr7	31401914	31403016	hs297	negative	yes
chr6	61041566	61044404	hg19	chr4	90917033	90921053	hs1374	negative	yes
chr6	72215186	72218828	mm9	chr6	72165180	72168822	mm123	positive	yes
chr6	72653770	72655985	hg19	chr2	85504632	85506255	hs1457	negative	yes
chr6	84190935	84192863	hg19	chr2	71892481	71894470	hs1506	negative	yes
chr6	84196001	84198367	hg19	chr2	71898013	71900892	hs1479	positive	yes
chr6	85164955	85166474	hg19	chr2	73124730	73126091	hs1025	negative	yes
chr6	85218005	85218946	hg19	chr2	73174800	73175769	hs400	negative	yes
chr6	86479302	86480169	hg19	chr2	70360263	70361614	hs2058	negative	yes
chr6	89034676	89036253	mm9	chr6	88984670	88986247	mm471	negative	yes
chr6	91144563	91149338	mm9	chr6	91094557	91099332	mm1314	negative	yes
chr6	93818356	93823383	mm9	chr6	93768350	93773377	mm1316	negative	yes
chr6	93920902	93922409	hg19	chr3	65589981	65591565	hs2038	negative	yes
chr6	94753098	94757440	mm9	chr6	94703092	94707434	mm878	negative	yes
chr6	98112394	98114832	mm9	chr6	98062388	98064826	mm60	negative	yes
chr6	98509376	98511048	hg19	chr3	70565242	70566852	hs206	negative	yes
chr6	98625750	98627137	hg19	chr3	70701489	70702904	hs1214	negative	yes
chr6	98767392	98769033	hg19	chr3	70871316	70872957	hs207	negative	yes
chr6	98944759	98945317	hg19	chr3	71026229	71026764	hs1231	negative	yes
chr6	98952036	98953088	hg19	chr3	71034389	71035430	hs864	negative	yes
chr6	98968191	98969077	hg19	chr3	71052376	71053246	hs854	negative	yes
chr6	99012966	99014601	hg19	chr3	71099157	71100851	hs965	positive	yes
chr6	99066719	99068664	hg19	chr3	71153556	71155053	hs1092	negative	yes
chr6	99103307	99105363	hg19	chr3	71186391	71188583	hs1572	negative	yes
chr6	99169018	99170092	hg19	chr3	71253670	71255013	hs1160	negative	yes
chr6	99189657	99191464	hg19	chr3	71277312	71278956	hs630	negative	yes
chr6	99201230	99203437	hg19	chr3	71290418	71292584	hs187	negative	yes
chr6	99251427	99252239	mm9	chr6	99201421	99202233	mm242	negative	yes
chr6	99346432	99348898	hg19	chr3	71446827	71448809	hs1116	negative	yes
chr6	99394912	99396384	hg19	chr3	71499477	71500970	hs997	negative	yes
chr6	99403919	99405378	hg19	chr3	71507469	71508874	hs973	negative	yes
chr6	99466877	99467819	hg19	chr3	71573607	71574540	hs1149	negative	yes
chr6	99483861	99486227	hg19	chr3	71590897	71592786	hs1010	negative	yes
chr6	99886863	99889372	mm9	chr6	99836857	99839366	mm681	negative	yes
chr6	100196170	100197937	hg19	chr3	72368145	72370230	hs2006	negative	yes
chr6	101279930	101282506	mm9	chr6	101229924	101232500	mm682	negative	yes
chr6	101936781	101939346	hg19	chr3	74128752	74131018	hs1732	negative	yes
chr6	112813562	112816924	mm9	chr6	112763556	112766918	mm1364	negative	yes
chr6	114802640	114805326	mm9	chr6	114752658	114755344	mm1386	negative	yes
chr6	116358989	116359750	hg19	chr10	46052882	46055670	hs2065	negative	yes
chr6	117279209	117280409	mm9	chr6	117229227	117230427	mm247	negative	yes
chr6	119965437	119966145	hg19	chr12	974062	974779	hs523	negative	yes
chr6	120174234	120175208	mm9	chr6	120124252	120125226	mm168	negative	yes
chr6	120353929	120355330	hg19	chr12	516066	518656	hs1574	negative	yes
chr6	122392605	122396323	mm9	chr6	122342623	122346341	mm94	positive	yes
chr6	136468119	136471874	hg19	chr12	14410263	14414344	hs1505	negative	yes
chr6	137823549	137824777	hg19	chr12	16170590	16171824	hs798	negative	yes
chr6	138250896	138252847	hg19	chr12	16610045	16611936	hs607	negative	yes
chr6	138379417	138380507	hg19	chr12	16715315	16716360	hs336	negative	yes
chr6	138513754	138516103	hg19	chr12	16869033	16871415	hs561	negative	yes
chr6	138581719	138583348	hg19	chr12	16940708	16942322	hs661	negative	yes
chr6	138708663	138709796	hg19	chr12	17033316	17034417	hs700	negative	yes
chr6	138750056	138755631	hg19	chr12	17171711	17174776	hs1532	negative	yes
chr6	138872005	138874064	hg19	chr12	17311784	17313759	hs993	negative	yes
chr6	139142856	139144124	hg19	chr12	17657732	17659008	hs605	negative	yes
chr6	139174149	139174798	hg19	chr12	17710284	17711214	hs940	negative	yes
chr6	139278532	139280000	hg19	chr12	17824855	17826335	hs579	negative	yes
chr6	139293287	139294551	hg19	chr12	17848111	17849347	hs980	negative	yes
chr6	139475726	139476681	hg19	chr12	18229480	18230430	hs647	negative	yes
chr6	141294807	141295982	mm9	chr6	141243328	141244503	mm20	negative	yes
chr6	142666341	142669080	hg19	chr12	22044071	22045600	hs2151	negative	yes
chr6	143297273	143298460	mm9	chr6	143245793	143246980	mm450	negative	yes
chr6	143437339	143439026	mm9	chr6	143385859	143387546	mm451	positive	yes
chr6	143497298	143500849	hg19	chr12	23211482	23214744	hs1603	positive	yes
chr6	144312294	144314020	hg19	chr12	24233884	24235634	hs895	positive	yes
chr6	144366812	144368484	hg19	chr12	24291012	24292724	hs233	negative	yes
chr6	144944642	144946014	mm9	chr6	144893162	144894534	mm456	negative	yes
chr6	145455166	145459586	mm9	chr6	145403686	145408106	mm1353	negative	yes
chr7	6850507	6853396	mm9	chr7	6803218	6806107	mm1396	negative	yes
chr7	16404746	16406411	mm9	chr7	16990095	16991760	mm289	negative	yes
chr7	25624415	25625718	hg19	chr19	41936986	41938891	hs1948	negative	yes
chr7	34265155	34269793	mm9	chr7	35050174	35054812	mm1379	positive	yes
chr7	36133667	36134870	hg19	chr19	32452701	32453894	hs536	negative	yes
chr7	36331253	36332000	hg19	chr19	32208758	32209473	hs870	negative	yes
chr7	36731580	36732163	hg19	chr19	31806450	31807052	hs386	negative	yes
chr7	36944653	36945744	hg19	chr19	31587058	31588070	hs385	negative	yes
chr7	37514719	37516041	hg19	chr19	31002941	31004262	hs384	negative	yes
chr7	37600138	37601255	hg19	chr19	30892408	30893525	hs821	negative	yes
chr7	37627775	37629439	hg19	chr19	30861188	30862816	hs615	negative	yes
chr7	37649562	37652734	hg19	chr19	30840299	30843536	hs430	negative	yes
chr7	37723253	37724497	hg19	chr19	30767058	30768273	hs383	negative	yes
chr7	37743016	37744607	hg19	chr19	30747057	30748648	hs858	positive	yes
chr7	37896463	37897436	hg19	chr19	30574387	30575360	hs721	negative	yes
chr7	37904896	37905962	hg19	chr19	30565950	30567016	hs382	negative	yes
chr7	37970404	37971287	hg19	chr19	30494614	30495503	hs381	negative	yes
chr7	38050393	38051470	hg19	chr19	30379565	30380645	hs587	negative	yes
chr7	46122737	46124706	hg19	chr11	17434517	17436675	hs1977	negative	yes
chr7	48824185	48826415	hg19	chr11	19194084	19196536	hs2144	negative	yes
chr7	48859734	48863011	hg19	chr11	19238352	19241998	hs2146	negative	yes
chr7	51968458	51970961	mm9	chr7	59223828	59226331	mm684	negative	yes
chr7	63956077	63960826	hg19	chr15	31595790	31600208	hs2231	negative	yes
chr7	68010057	68013211	hg19	chr15	99257740	99262228	hs1932	negative	yes
chr7	68127362	68130866	mm9	chr7	75272248	75275752	mm727	negative	yes
chr7	69844768	69846095	hg19	chr15	97391638	97393001	hs184	negative	yes
chr7	70117149	70119433	hg19	chr15	97128054	97130294	hs1320	negative	yes
chr7	71745874	71747723	hg19	chr15	95335996	95337446	hs624	negative	yes
chr7	72540418	72543229	hg19	chr15	94524574	94527142	hs1686	negative	yes
chr7	76437642	76440363	mm9	chr7	83582528	83585249	mm1397	negative	yes
chr7	80118294	80122263	mm9	chr7	87263180	87267149	mm1320	negative	yes
chr7	80445068	80446500	mm9	chr7	87589954	87591386	mm169	negative	yes
chr7	80788938	80790184	mm9	chr7	87933824	87935070	mm170	negative	yes
chr7	82382717	82383985	hg19	chr15	84376560	84378448	hs1514	negative	yes
chr7	83060306	83061647	hg19	chr15	82179952	82181888	hs1494	negative	yes
chr7	83811918	83815428	mm9	chr7	90960428	90963938	mm729	positive	yes
chr7	89454520	89457635	hg19	chr11	86606894	86609999	hs1689	negative	yes
chr7	98956509	98958634	hg19	chr11	75758037	75760619	hs1435	positive	yes
chr7	99359662	99361402	hg19	chr11	75264066	75266752	hs1748	negative	yes
chr7	101713527	101714553	hg19	chr11	72080520	72081501	hs873	negative	yes
chr7	103858636	103859881	mm9	chr7	111007150	111008395	mm263	negative	yes
chr7	108796607	108799113	mm9	chr7	115940121	115942627	mm686	positive	yes
chr7	109113133	109117303	hg19	chr11	8226046	8230683	hs1859	negative	yes
chr7	109161322	109162713	hg19	chr11	8275137	8276335	hs183	negative	yes
chr7	109202812	109203341	hg19	chr11	8317705	8318230	hs333	negative	yes
chr7	109558267	109560092	hg19	chr11	8753701	8755208	hs2403	negative	yes
chr7	110162809	110166321	mm9	chr7	117306323	117309835	mm725	negative	yes
chr7	112280437	112281385	hg19	chr11	12203825	12205249	hs2378	negative	yes
chr7	112297825	112299422	mm9	chr7	119441339	119442936	mm79	negative	yes
chr7	112351476	112353289	hg19	chr11	12281493	12283415	hs2076	negative	yes
chr7	112824612	112827409	hg19	chr11	12865332	12868546	hs1314	positive	yes
chr7	114896548	114897751	hg19	chr11	15321699	15322906	hs681	negative	yes
chr7	115131420	115132739	hg19	chr11	15587041	15588314	hs692	negative	yes
chr7	115169640	115170725	hg19	chr11	15623970	15625123	hs235	negative	yes
chr7	115595838	115599194	mm9	chr7	122739352	122742708	mm897	negative	yes
chr7	115644905	115646551	hg19	chr11	16190865	16192453	hs1720	negative	yes
chr7	115745167	115746401	hg19	chr11	16311593	16312881	hs883	negative	yes
chr7	115749542	115750857	hg19	chr11	16316207	16317562	hs236	negative	yes
chr7	115824529	115825832	hg19	chr11	16377777	16379090	hs717	negative	yes
chr7	115864594	115867473	hg19	chr11	16423269	16426037	hs1301	negative	yes
chr7	116204293	116209469	hg19	chr11	16913136	16917745	hs2096	negative	yes
chr7	116687003	116687716	hg19	chr16	18240361	18241096	hs97	negative	yes
chr7	117242694	117244008	hg19	chr16	17745104	17746413	hs96	negative	yes
chr7	117756291	117757213	hg19	chr16	17096348	17097253	hs95	negative	yes
chr7	121252178	121253246	hg19	chr16	22684122	22685282	hs98	negative	yes
chr7	124032956	124034354	hg19	chr16	25759215	25760529	hs99	negative	yes
chr7	124502182	124503492	hg19	chr16	26226210	26227347	hs100	negative	yes
chr7	125764047	125765353	mm9	chr7	132907561	132908867	mm174	negative	yes
chr7	129743441	129744988	mm9	chr7	136886955	136888502	mm607	negative	yes
chr7	130059548	130061335	mm9	chr7	137203062	137204849	mm608	negative	yes
chr7	130425765	130427321	mm9	chr7	137569279	137570835	mm938	positive	yes
chr7	131463947	131465852	hg19	chr10	124827454	124829734	hs1319	negative	yes
chr7	131496657	131497909	hg19	chr10	124851813	124853071	hs329	positive	yes
chr7	131549727	131551322	hg19	chr10	124902927	124904638	hs1005	negative	yes
chr7	131712593	131713659	hg19	chr10	125108319	125109394	hs771	negative	yes
chr7	131777679	131778766	hg19	chr10	125188987	125190075	hs578	negative	yes
chr7	132807589	132808550	mm9	chr7	139999272	140000233	mm547	negative	yes
chr7	133189780	133190441	hg19	chr10	126905322	126906003	hs330	negative	yes
chr7	134677970	134680502	mm9	chr7	141869653	141872185	mm1405	negative	yes
chr7	135137921	135140618	mm9	chr7	142329604	142332301	mm1401	negative	yes
chr7	135756830	135757856	hg19	chr10	129964063	129965094	hs542	negative	yes
chr7	136083205	136084349	hg19	chr10	130366868	130368005	hs737	negative	yes
chr7	136490620	136492389	hg19	chr10	130831457	130833175	hs699	negative	yes
chr7	136737154	136739340	hg19	chr10	131106522	131108742	hs562	negative	yes
chr7	137002009	137003274	hg19	chr10	131400948	131402279	hs656	negative	yes
chr7	137005038	137006321	hg19	chr10	131404068	131405310	hs696	negative	yes
chr7	137039207	137041141	hg19	chr10	131445787	131447685	hs331	negative	yes
chr7	137091736	137093087	hg19	chr10	131514821	131516186	hs589	negative	yes
chr7	137250056	137251790	hg19	chr10	131691086	131692848	hs232	negative	yes
chr7	142547513	142549546	hg19	chr11	1985072	1987372	hs1488	positive	yes
chr7	142551566	142554813	mm9	chr7	149737471	149740718	mm50	positive	yes
chr7	142568912	142573912	mm9	chr7	149754817	149759817	mm47	positive	yes
chr7	143049845	143051046	hg19	chr11	2395417	2396757	hs1775	negative	yes
chr7	143112060	143112968	mm9	chr7	150297965	150298873	mm183	negative	yes
chr7	143153813	143155333	mm9	chr7	150339718	150341238	mm603	negative	yes
chr7	143196346	143199475	hg19	chr11	2610931	2614716	hs2227	negative	yes
chr7	144993471	144997721	hg19	chr11	69308185	69312534	hs1920	negative	yes
chr7	145117572	145118950	hg19	chr11	69054197	69056378	hs2073	negative	yes
chr8	7158456	7160863	hg19	chr13	105768073	105771898	hs1991	positive	yes
chr8	7173668	7181141	hg19	chr13	105779751	105785542	hs1992	negative	yes
chr8	7439758	7441123	hg19	chr13	106015598	106016927	hs759	negative	yes
chr8	8102246	8104749	mm9	chr8	8102246	8104749	mm688	negative	yes
chr8	8488054	8491339	mm9	chr8	8488054	8491339	mm985	negative	yes
chr8	11356668	11359383	mm9	chr8	11356668	11359383	mm1362	negative	yes
chr8	11896202	11896925	hg19	chr13	112037298	112038041	hs621	negative	yes
chr8	12065991	12066965	hg19	chr13	112268067	112269088	hs1246	negative	yes
chr8	12462372	12463356	hg19	chr13	112793153	112794130	hs571	negative	yes
chr8	14071980	14074029	mm9	chr8	14071980	14074029	mm907	negative	yes
chr8	18711247	18712747	hg19	chr8	6385759	6386963	hs1823	negative	yes
chr8	25342689	25344335	mm9	chr8	26453161	26454807	mm610	positive	yes
chr8	25440188	25442103	mm9	chr8	26550660	26552575	mm919	positive	yes
chr8	25543011	25545762	mm9	chr8	26653483	26656234	mm612	positive	yes
chr8	26384788	26385647	hg19	chr8	36957851	36958723	hs631	negative	yes
chr8	26688782	26690360	hg19	chr8	37249594	37251182	hs302	positive	yes
chr8	26913996	26914881	hg19	chr8	37495309	37496204	hs834	positive	yes
chr8	27106327	27108431	mm9	chr8	28216799	28218903	mm136	negative	yes
chr8	29542874	29546065	hg19	chr8	34855837	34858630	hs1370	negative	yes
chr8	30647940	30649075	hg19	chr8	33891203	33892738	hs1715	negative	yes
chr8	30921431	30926501	hg19	chr8	33660674	33665591	hs1718	negative	yes
chr8	32303659	32305872	hg19	chr8	32063683	32067187	hs1719	negative	yes
chr8	33903821	33907069	mm9	chr8	35014293	35017541	mm70	negative	yes
chr8	46770571	46772246	mm9	chr8	47855925	47857600	mm9	negative	yes
chr8	46848055	46851393	hg19	chr4	185305050	185308214	hs1935	negative	yes
chr8	50708169	50709136	hg19	chr4	181201559	181202529	hs886	negative	yes
chr8	57327753	57329581	mm9	chr8	59806550	59808378	mm1284	negative	yes
chr8	57335225	57335793	hg19	chr4	174436313	174436870	hs494	negative	yes
chr8	57347180	57351136	mm9	chr8	59825977	59829933	mm844	negative	yes
chr8	57359264	57363084	mm9	chr8	59838061	59841881	mm847	negative	yes
chr8	77266899	77270239	hg19	chr4	148973160	148977273	hs2100	negative	yes
chr8	77671733	77672642	mm9	chr8	80195632	80196541	mm761	negative	yes
chr8	77707194	77708233	mm9	chr8	80231093	80232132	mm760	negative	yes
chr8	77722984	77723939	mm9	chr8	80246883	80247838	mm759	negative	yes
chr8	77987315	77989135	mm9	chr8	80511214	80513034	mm172	negative	yes
chr8	78001608	78002512	mm9	chr8	80525507	80526411	mm236	negative	yes
chr8	78740514	78743542	mm9	chr8	81264413	81267441	mm1335	negative	yes
chr8	79837629	79838677	hg19	chr4	145860001	145861281	hs904	negative	yes
chr8	80055436	80057136	hg19	chr4	145568248	145569955	hs905	negative	yes
chr8	80314047	80315941	hg19	chr4	145276813	145278719	hs906	positive	yes
chr8	80501065	80501915	mm9	chr8	83024964	83025814	mm25	negative	yes
chr8	84728902	84732705	mm9	chr8	87252801	87256604	mm21	negative	yes
chr8	84741926	84745072	hg19	chr19	13163511	13167355	hs1900	negative	yes
chr8	87120551	87122269	hg19	chr16	48912816	48914144	hs101	negative	yes
chr8	87151207	87154296	mm9	chr8	89675106	89678195	mm1336	negative	yes
chr8	87270550	87271379	hg19	chr16	49094466	49095242	hs124	negative	yes
chr8	87835970	87837269	hg19	chr16	49735099	49736449	hs625	negative	yes
chr8	88757982	88759109	hg19	chr16	50848355	50849656	hs85	negative	yes
chr8	88774689	88776074	hg19	chr16	50869692	50871098	hs162	negative	yes
chr8	88779183	88779972	hg19	chr16	50874863	50875709	hs84	negative	yes
chr8	88877161	88878261	hg19	chr16	50977028	50978183	hs83	negative	yes
chr8	88881293	88881923	hg19	chr16	50982029	50982689	hs82	negative	yes
chr8	88902694	88903557	hg19	chr16	51010690	51011608	hs81	negative	yes
chr8	88924828	88925618	hg19	chr16	51042253	51043115	hs80	negative	yes
chr8	88939020	88940224	hg19	chr16	51056311	51057592	hs79	negative	yes
chr8	88973175	88974114	hg19	chr16	51106148	51107109	hs78	negative	yes
chr8	88991556	88992644	hg19	chr16	51129207	51130306	hs77	negative	yes
chr8	89002204	89004697	mm9	chr8	91526103	91528596	mm659	negative	yes
chr8	89005819	89007424	hg19	chr16	51147012	51148642	hs152	negative	yes
chr8	89086387	89087574	hg19	chr16	51231121	51232362	hs76	negative	yes
chr8	89240948	89242638	hg19	chr16	51389295	51390719	hs75	negative	yes
chr8	89323884	89325178	hg19	chr16	51491799	51493025	hs848	negative	yes
chr8	89371089	89371832	hg19	chr16	51560196	51560925	hs74	negative	yes
chr8	89386848	89388302	hg19	chr16	51576725	51578101	hs73	negative	yes
chr8	89454508	89455383	hg19	chr16	51657810	51658716	hs72	positive	yes
chr8	89464933	89465803	hg19	chr16	51671181	51672039	hs71	negative	yes
chr8	89515749	89517087	hg19	chr16	51732148	51733614	hs70	negative	yes
chr8	89536202	89537046	hg19	chr16	51757191	51758243	hs69	negative	yes
chr8	89561872	89563081	hg19	chr16	51786180	51787369	hs68	negative	yes
chr8	89596225	89597315	hg19	chr16	51817305	51818432	hs66	negative	yes
chr8	89631806	89633060	hg19	chr16	51853597	51854931	hs160	negative	yes
chr8	89731015	89732913	hg19	chr16	51958288	51959688	hs65	negative	yes
chr8	89992683	89995450	mm9	chr8	92516582	92519349	mm1385	negative	yes
chr8	90011558	90012979	hg19	chr16	52242610	52244077	hs154	negative	yes
chr8	90203841	90204770	hg19	chr16	52436255	52437376	hs64	negative	yes
chr8	90213533	90214666	hg19	chr16	52446050	52447237	hs161	negative	yes
chr8	90243821	90246886	hg19	chr16	52468529	52471762	hs1300	positive	yes
chr8	90276086	90277206	hg19	chr16	52503834	52504926	hs63	negative	yes
chr8	90301584	90303038	hg19	chr16	52530541	52531971	hs62	negative	yes
chr8	90322237	90323493	hg19	chr16	52551597	52552835	hs164	negative	yes
chr8	90327959	90329477	hg19	chr16	52557406	52558785	hs153	negative	yes
chr8	90494121	90499562	hg19	chr16	52740114	52744871	hs1682	negative	yes
chr8	90738604	90742411	mm9	chr8	93262503	93266310	mm871	negative	yes
chr8	91170647	91172060	hg19	chr16	53563054	53564455	hs859	negative	yes
chr8	91185300	91186231	hg19	chr16	53578034	53578985	hs60	negative	yes
chr8	91305057	91306285	hg19	chr16	53726316	53727556	hs59	negative	yes
chr8	91342028	91342872	hg19	chr16	53760298	53761157	hs58	negative	yes
chr8	91491445	91492009	hg19	chr16	53929213	53929824	hs57	negative	yes
chr8	91508767	91510326	hg19	chr16	53948201	53949846	hs155	negative	yes
chr8	91538299	91539821	hg19	chr16	53986630	53988193	hs157	negative	yes
chr8	91545727	91547572	hg19	chr16	53994058	53995943	hs156	negative	yes
chr8	91622042	91623486	hg19	chr16	54092614	54094121	hs55	negative	yes
chr8	91656701	91658041	hg19	chr16	54132651	54133957	hs167	negative	yes
chr8	91661914	91662349	hg19	chr16	54139806	54140268	hs53	negative	yes
chr8	91664604	91665497	hg19	chr16	54143854	54144867	hs52	negative	yes
chr8	91749887	91751412	hg19	chr16	54249594	54251153	hs166	negative	yes
chr8	91804616	91805515	hg19	chr16	54323420	54324336	hs51	negative	yes
chr8	91826762	91828112	hg19	chr16	54350345	54351685	hs50	negative	yes
chr8	91855876	91856486	hg19	chr16	54385019	54385639	hs49	negative	yes
chr8	91973744	91974600	hg19	chr16	54523175	54524067	hs46	negative	yes
chr8	91991197	91992386	hg19	chr16	54540302	54541446	hs47	negative	yes
chr8	92025551	92027827	hg19	chr16	54575878	54577925	hs43	negative	yes
chr8	92029339	92030277	hg19	chr16	54579726	54580655	hs42	negative	yes
chr8	92058698	92059642	hg19	chr16	54611467	54612437	hs41	negative	yes
chr8	92063821	92064618	hg19	chr16	54616212	54617037	hs44	negative	yes
chr8	92065543	92066816	hg19	chr16	54618981	54620264	hs39	negative	yes
chr8	92070441	92071690	hg19	chr16	54624504	54625510	hs38	negative	yes
chr8	92094559	92095829	hg19	chr16	54650598	54651882	hs37	negative	yes
chr8	92100436	92101518	hg19	chr16	54657182	54658317	hs36	negative	yes
chr8	92113436	92115404	hg19	chr16	54665329	54667258	hs35	negative	yes
chr8	92127674	92128542	hg19	chr16	54679467	54680359	hs34	negative	yes
chr8	92219224	92220146	hg19	chr16	54784643	54785615	hs32	negative	yes
chr8	92231178	92232317	hg19	chr16	54799102	54800160	hs31	negative	yes
chr8	92444894	92445556	hg19	chr16	55074360	55075075	hs28	negative	yes
chr8	92449353	92450411	hg19	chr16	55079237	55080429	hs27	positive	yes
chr8	92545405	92546474	hg19	chr16	55223185	55224283	hs26	negative	yes
chr8	92555076	92555722	hg19	chr16	55240593	55241874	hs25	negative	yes
chr8	92648090	92649598	hg19	chr16	55329289	55330760	hs151	negative	yes
chr8	92735259	92736114	hg19	chr16	55418032	55418881	hs24	negative	yes
chr8	92742867	92744200	hg19	chr16	55424416	55425738	hs23	negative	yes
chr8	95426508	95428314	mm9	chr8	97950408	97952214	mm71	negative	yes
chr8	96697395	96698403	hg19	chr16	59574986	59575985	hs125	negative	yes
chr8	96748090	96749593	hg19	chr16	59629741	59631254	hs102	negative	yes
chr8	97896820	97898245	hg19	chr16	60683721	60685186	hs103	negative	yes
chr8	98309178	98310337	hg19	chr16	61057518	61059625	hs1383	negative	yes
chr8	98383886	98385543	hg19	chr16	61134464	61136214	hs1785	negative	yes
chr8	98485345	98486685	hg19	chr16	61243163	61244434	hs104	negative	yes
chr8	99550507	99551513	mm9	chr8	102074407	102075413	mm61	negative	yes
chr8	100368955	100370435	hg19	chr16	62942559	62944021	hs105	negative	yes
chr8	102265497	102266851	hg19	chr16	64651540	64652894	hs106	negative	yes
chr8	103077237	103078991	mm9	chr8	105601137	105602891	mm40	negative	yes
chr8	104609522	104612018	hg19	chr16	66937076	66939560	hs1760	negative	yes
chr8	107338845	107339359	hg19	chr16	69680967	69681481	hs487	negative	yes
chr8	107603124	107603793	hg19	chr16	74308568	74309245	hs723	negative	yes
chr8	108025351	108029328	hg19	chr16	73825193	73828566	hs1612	positive	yes
chr8	108454368	108455838	hg19	chr16	73362809	73364292	hs1724	negative	yes
chr8	108466097	108468544	hg19	chr16	73352312	73354585	hs109	negative	yes
chr8	108802402	108804650	hg19	chr16	72980900	72982545	hs16	negative	yes
chr8	108850360	108851498	hg19	chr16	72929878	72931288	hs17	negative	yes
chr8	108889314	108890250	hg19	chr16	72887593	72888513	hs18	negative	yes
chr8	108937415	108938616	hg19	chr16	72839562	72841124	hs19	negative	yes
chr8	109034350	109035846	hg19	chr16	72738568	72740149	hs20	negative	yes
chr8	109122962	109124626	hg19	chr16	72623665	72625217	hs165	negative	yes
chr8	109310590	109313918	hg19	chr16	72404533	72407591	hs108	positive	yes
chr8	109416598	109418210	hg19	chr16	72275206	72276782	hs21	negative	yes
chr8	109436456	109437562	hg19	chr16	72254566	72255825	hs22	negative	yes
chr8	114499211	114500511	hg19	chr16	78209751	78211362	hs15	negative	yes
chr8	114650146	114651788	hg19	chr16	78387021	78388685	hs14	negative	yes
chr8	114657896	114658964	hg19	chr16	78397855	78398920	hs163	negative	yes
chr8	114691555	114692470	hg19	chr16	78436409	78437708	hs13	negative	yes
chr8	114744435	114745938	hg19	chr16	78510608	78511944	hs12	negative	yes
chr8	114858195	114859805	hg19	chr16	78643215	78644831	hs11	negative	yes
chr8	114990842	114992280	hg19	chr16	78832182	78833595	hs10	negative	yes
chr8	115077611	115080246	hg19	chr16	78933253	78934686	hs9	negative	yes
chr8	115149714	115151348	hg19	chr16	79026563	79028162	hs7	negative	yes
chr8	115473042	115474528	hg19	chr16	79381526	79382736	hs159	negative	yes
chr8	115998273	115999564	hg19	chr16	79949950	79951518	hs6	negative	yes
chr8	116013572	116015153	hg19	chr16	79969907	79971297	hs5	negative	yes
chr8	116163758	116166268	mm9	chr8	118687658	118690168	mm1394	negative	yes
chr8	116335195	116337629	hg19	chr16	80372593	80373755	hs4	negative	yes
chr8	116384137	116385431	hg19	chr16	80423343	80424652	hs3	negative	yes
chr8	118377800	118380129	hg19	chr16	82767609	82770047	hs1959	negative	yes
chr8	120292012	120294793	mm9	chr8	122815912	122818693	mm196	negative	yes
chr8	120370900	120372676	mm9	chr8	122894800	122896576	mm99	negative	yes
chr8	120516455	120517853	hg19	chr16	85620095	85621736	hs2	negative	yes
chr8	121002895	121003512	hg19	chr16	86430087	86430726	hs1	positive	yes
chr8	121170103	121171139	mm9	chr8	123694003	123695039	mm241	negative	yes
chr8	121283047	121284421	mm9	chr8	123806947	123808321	mm335	negative	yes
chr8	121300361	121303557	hg19	chr16	86943367	86946175	hs1613	positive	yes
chr8	121665198	121666118	mm9	chr8	124189098	124190018	mm338	negative	yes
chr8	122711842	122713825	hg19	chr16	89057397	89061023	hs1854	negative	yes
chr8	124643703	124645898	hg19	chr1	230984523	230987981	hs1766	negative	yes
chr8	125217043	125219851	mm9	chr8	127740943	127743751	mm149	positive	yes
chr8	125557736	125559984	hg19	chr1	232753930	232757436	hs1714	negative	yes
chr8	126536388	126537692	mm9	chr8	129060288	129061592	mm495	negative	yes
chr8	126665421	126667756	mm9	chr8	129189321	129191656	mm1295	negative	yes
chr9	13697970	13700760	mm9	chr9	13502414	13505204	mm1371	negative	yes
chr9	21556730	21559920	mm9	chr9	21361174	21364364	mm1378	negative	yes
chr9	23377927	23379852	hg19	chr7	34097962	34100011	hs1336	negative	yes
chr9	24720490	24721595	hg19	chr7	35236863	35237925	hs470	negative	yes
chr9	24737086	24737801	hg19	chr7	35254518	35255251	hs471	negative	yes
chr9	24748244	24749108	hg19	chr7	35268514	35269380	hs466	negative	yes
chr9	24754514	24755359	hg19	chr7	35275271	35276121	hs467	negative	yes
chr9	24789002	24789893	hg19	chr7	35320121	35321085	hs464	negative	yes
chr9	24802515	24803444	hg19	chr7	35331175	35332120	hs468	negative	yes
chr9	24811553	24812154	hg19	chr7	35342478	35343110	hs473	negative	yes
chr9	24833559	24834351	hg19	chr7	35359004	35359854	hs469	negative	yes
chr9	24860616	24861316	hg19	chr7	35388314	35389035	hs474	negative	yes
chr9	24887072	24890068	mm9	chr9	24691516	24694512	mm130	negative	yes
chr9	24919749	24921117	hg19	chr7	35454800	35456218	hs461	negative	yes
chr9	24922167	24923116	hg19	chr7	35458551	35459522	hs472	negative	yes
chr9	24973917	24975039	hg19	chr7	35505184	35506342	hs463	negative	yes
chr9	25055368	25056389	hg19	chr7	35590614	35591629	hs465	negative	yes
chr9	27937330	27938180	hg19	chr11	133260478	133261391	hs1722	negative	yes
chr9	29318640	29319071	hg19	chr11	131867949	131868377	hs335	positive	yes
chr9	34557590	34559391	hg19	chr11	126797947	126800656	hs1396	negative	yes
chr9	35423877	35427018	hg19	chr11	125927055	125930318	hs1641	negative	yes
chr9	37053339	37055278	mm9	chr9	36860924	36862863	mm577	positive	yes
chr9	41071639	41074687	mm9	chr9	40879722	40882770	mm1337	negative	yes
chr9	41735464	41736837	hg19	chr11	121799771	121801171	hs872	negative	yes
chr9	43564181	43568174	hg19	chr11	119759730	119763658	hs1915	negative	yes
chr9	44877225	44880193	hg19	chr11	118308306	118311240	hs1793	negative	yes
chr9	46118249	46121546	mm9	chr9	45926332	45929629	mm54	negative	yes
chr9	46381148	46381839	hg19	chr11	116521882	116522627	hs1632	negative	yes
chr9	46620224	46623042	hg19	chr11	116273269	116275127	hs1786	negative	yes
chr9	46660108	46660820	hg19	chr11	116232556	116233265	hs334	negative	yes
chr9	47376512	47377360	mm9	chr9	47184595	47185443	mm251	negative	yes
chr9	49736440	49738293	hg19	chr11	112893161	112895172	hs1810	negative	yes
chr9	52147925	52150393	hg19	chr11	110000895	110003234	hs1311	negative	yes
chr9	54335032	54337557	mm9	chr9	54182839	54185364	mm786	negative	yes
chr9	57806611	57807834	hg19	chr15	74870847	74872794	hs1510	negative	yes
chr9	61370059	61371070	hg19	chr15	70391576	70392613	hs359	negative	yes
chr9	61600844	61603666	mm9	chr9	61448651	61451473	mm29	positive	yes
chr9	62414649	62415677	mm9	chr9	62262456	62263484	mm210	negative	yes
chr9	63108235	63110238	mm9	chr9	62956042	62958045	mm211	negative	yes
chr9	63131587	63133435	mm9	chr9	62979394	62981242	mm285	negative	yes
chr9	63176077	63177276	hg19	chr15	68079283	68080713	hs178	negative	yes
chr9	63523991	63524533	hg19	chr15	67665164	67665685	hs358	negative	yes
chr9	63880199	63881508	hg19	chr15	67198974	67200134	hs660	negative	yes
chr9	64044784	64046949	mm9	chr9	63892591	63894756	mm69	negative	yes
chr9	65381642	65384657	hg19	chr15	65377669	65381418	hs1944	negative	yes
chr9	65825989	65827111	hg19	chr15	64753430	64754564	hs817	negative	yes
chr9	67001298	67004558	hg19	chr15	63382545	63386341	hs2160	negative	yes
chr9	67040666	67043521	mm9	chr9	66888473	66891328	mm100	negative	yes
chr9	68794558	68797064	mm9	chr9	68642365	68644871	mm690	negative	yes
chr9	70834536	70835234	mm9	chr9	70682343	70683041	mm190	negative	yes
chr9	71974987	71975901	hg19	chr15	57426028	57426952	hs623	negative	yes
chr9	71975968	71976731	hg19	chr15	57425244	57425958	hs357	negative	yes
chr9	88030648	88034978	hg19	chr6	85786519	85788823	hs2300	negative	yes
chr9	88048577	88050948	mm9	chr9	87943415	87945786	mm898	positive	yes
chr9	88070457	88074527	hg19	chr6	85825565	85829412	hs2298	negative	yes
chr9	88136652	88139609	hg19	chr6	85895615	85898006	hs2301	negative	yes
chr9	88195357	88199255	hg19	chr6	85980888	85984064	hs2297	negative	yes
chr9	90125755	90126865	hg19	chr15	79151012	79154383	hs2500	negative	yes
chr9	90313788	90316367	hg19	chr3	148085265	148088422	hs1787	negative	yes
chr9	90419622	90421316	hg19	chr3	148006499	148007810	hs1115	negative	yes
chr9	90691310	90692526	hg19	chr3	147802357	147803586	hs1203	negative	yes
chr9	90692810	90693923	hg19	chr3	147801015	147802169	hs654	negative	yes
chr9	90700206	90701273	hg19	chr3	147793207	147794247	hs739	negative	yes
chr9	90730671	90732594	hg19	chr3	147753310	147755618	hs1549	negative	yes
chr9	90739783	90741475	hg19	chr3	147748015	147749579	hs1038	negative	yes
chr9	90833187	90835006	hg19	chr3	147651676	147653436	hs1224	negative	yes
chr9	90902261	90905638	hg19	chr3	147563409	147566604	hs1573	negative	yes
chr9	91073326	91074669	hg19	chr3	147393021	147394349	hs1184	negative	yes
chr9	91087949	91090092	hg19	chr3	147378547	147380603	hs1173	negative	yes
chr9	91366859	91368203	hg19	chr3	147125146	147126336	hs1043	negative	yes
chr9	91445768	91447285	hg19	chr3	147049536	147051100	hs213	positive	yes
chr9	91462358	91463892	hg19	chr3	147030229	147031770	hs212	negative	yes
chr9	95812717	95815609	mm9	chr9	95713136	95716028	mm1367	negative	yes
chr9	96380312	96382941	hg19	chr3	141579463	141580810	hs2041	positive	yes
chr9	99773255	99774439	hg19	chr3	137638911	137640108	hs843	negative	yes
chr9	99994346	99995440	hg19	chr3	137360823	137361964	hs666	negative	yes
chr9	100130872	100131771	hg19	chr3	137185964	137186866	hs653	negative	yes
chr9	100166423	100168226	hg19	chr3	137125171	137126977	hs211	negative	yes
chr9	100194021	100195330	hg19	chr3	137067622	137068925	hs210	negative	yes
chr9	100210152	100211938	hg19	chr3	137047544	137049271	hs209	negative	yes
chr9	100271529	100272974	hg19	chr3	136982707	136984175	hs208	positive	yes
chr9	103679109	103679657	mm9	chr9	103581439	103581987	mm303	negative	yes
chr9	106382995	106385663	mm9	chr9	106285326	106287994	mm342	negative	yes
chr9	106416951	106418793	mm9	chr9	106319282	106321124	mm362	negative	yes
chr9	107305936	107309959	hg19	chr3	50636478	50640158	hs1747	negative	yes
chr9	109892964	109896468	mm9	chr9	109795468	109798972	mm736	negative	yes
chr9	118317971	118319794	hg19	chr3	28033828	28035751	hs1557	negative	yes
chr9	118858597	118861666	hg19	chr3	37805999	37809080	hs1961	negative	yes
chr9	118863536	118868147	hg19	chr3	37810701	37814504	hs1914	negative	yes
chr9	119496374	119501352	hg19	chr3	38602635	38607552	hs2176	negative	yes
chr9	120601909	120604533	mm9	chr9	120511026	120513650	mm1406	negative	yes
chr9	121301588	121305883	mm9	chr9	121210706	121215001	mm1305	negative	yes
chr9	121355289	121357466	hg19	chr3	42113230	42114717	hs2359	negative	yes
chr10	8968318	8968915	mm9	chr10	8688116	8688713	mm482	negative	yes
chr10	17228736	17232667	hg19	chr6	140207977	140211769	hs1644	negative	yes
chr10	19077704	19080447	hg19	chr6	138131886	138133298	hs1832	negative	yes
chr10	20484902	20488767	mm9	chr10	20204708	20208573	mm140	negative	yes
chr10	21081771	21084133	hg19	chr6	135601698	135604052	hs1351	negative	yes
chr10	24493263	24494942	mm9	chr10	24213069	24214748	mm46	negative	yes
chr10	30997657	30998999	mm9	chr10	30717463	30718805	mm766	negative	yes
chr10	31027819	31028728	mm9	chr10	30747625	30748534	mm767	negative	yes
chr10	31034051	31035579	mm9	chr10	30753857	30755385	mm764	negative	yes
chr10	31053081	31054088	mm9	chr10	30772887	30773894	mm763	negative	yes
chr10	31228891	31229864	mm9	chr10	30948697	30949670	mm762	negative	yes
chr10	31272653	31273675	mm9	chr10	30992459	30993481	mm765	negative	yes
chr10	36483581	36486087	mm9	chr10	36203387	36205893	mm693	positive	yes
chr10	38552270	38556079	hg19	chr6	112822313	112826325	hs1302	negative	yes
chr10	39657715	39661924	hg19	chr6	111871688	111876668	hs1690	negative	yes
chr10	42250904	42252282	hg19	chr6	108909808	108911282	hs2394	negative	yes
chr10	42634081	42635173	hg19	chr6	108437243	108438452	hs1189	negative	yes
chr10	42635864	42636982	hg19	chr6	108435330	108436506	hs1033	negative	yes
chr10	43722436	43724832	hg19	chr6	107220829	107222652	hs1483	negative	yes
chr10	43746138	43746678	mm9	chr10	43465944	43466484	mm228	negative	yes
chr10	45139830	45141705	hg19	chr6	105751633	105753639	hs1501	negative	yes
chr10	45228613	45231786	mm9	chr10	44948419	44951592	mm87	positive	yes
chr10	45893126	45894695	hg19	chr6	105044981	105046701	hs1452	positive	yes
chr10	49984350	49985954	hg19	chr6	101743524	101745234	hs1738	positive	yes
chr10	50833720	50834474	hg19	chr6	100973811	100974593	hs292	negative	yes
chr10	50901664	50902602	hg19	chr6	100904128	100905067	hs2319	negative	yes
chr10	51257067	51258555	hg19	chr6	100657912	100659391	hs576	negative	yes
chr10	52741812	52745154	mm9	chr10	52461618	52464960	mm782	negative	yes
chr10	53343658	53344819	hg19	chr6	118878956	118881186	hs2189	negative	yes
chr10	56979108	56981816	mm9	chr10	56698914	56701622	mm74	negative	yes
chr10	58382775	58383620	hg19	chr2	109252387	109254056	hs2372	negative	yes
chr10	59442760	59444333	mm9	chr10	58905508	58907081	mm65	negative	yes
chr10	59967735	59971225	hg19	chr10	74013084	74016357	hs1834	negative	yes
chr10	61532677	61537653	mm9	chr10	60995425	61000401	mm1303	negative	yes
chr10	62128053	62130842	hg19	chr10	71335775	71338729	hs1699	negative	yes
chr10	69642709	69646964	mm9	chr10	69105457	69109712	mm1382	negative	yes
chr10	70733385	70734388	hg19	chr10	60791178	60792149	hs727	negative	yes
chr10	79839861	79842369	mm9	chr10	79302606	79305114	mm758	negative	yes
chr10	80773811	80774999	mm9	chr10	80236556	80237744	mm200	negative	yes
chr10	86294227	86297417	mm9	chr10	85756972	85760162	mm52	negative	yes
chr10	87292837	87293886	hg19	chr12	103613944	103615320	hs1723	negative	yes
chr10	87324268	87326930	hg19	chr12	103570982	103573398	hs1575	negative	yes
chr10	87388707	87389894	hg19	chr12	103484342	103485519	hs967	negative	yes
chr10	87445159	87449773	hg19	chr12	103405110	103408796	hs1540	negative	yes
chr10	87473282	87474591	hg19	chr12	103371349	103372610	hs1114	negative	yes
chr10	87500259	87501668	hg19	chr12	103345263	103346680	hs1122	negative	yes
chr10	87868234	87870738	mm9	chr10	87330979	87333483	mm694	positive	yes
chr10	91186361	91188450	hg19	chr12	98883495	98887039	hs2152	negative	yes
chr10	92555687	92557809	hg19	chr12	97468703	97471089	hs1341	negative	yes
chr10	96708320	96708857	mm9	chr10	96170954	96171491	mm313	negative	yes
chr10	98683082	98685589	mm9	chr10	98145716	98148223	mm696	negative	yes
chr10	108587858	108589363	hg19	chr12	79739233	79740570	hs943	negative	yes
chr10	119760180	119762864	hg19	chr12	67127104	67129730	hs1498	negative	yes
chr10	120551958	120553597	mm9	chr10	119989014	119990653	mm569	negative	yes
chr10	122768032	122770538	mm9	chr10	122205088	122207594	mm697	negative	yes
chr10	125809055	125811062	hg19	chr12	59460190	59462367	hs1427	positive	yes
chr10	125921038	125928971	hg19	chr12	59361630	59364518	hs1468	positive	yes
chr11	7054211	7057799	mm9	chr11	6954214	6957802	mm1025	negative	yes
chr11	11527967	11528770	hg19	chr7	50219464	50220288	hs877	negative	yes
chr11	11675621	11677027	hg19	chr7	50333048	50334464	hs961	negative	yes
chr11	11699170	11700205	hg19	chr7	50357638	50358644	hs972	negative	yes
chr11	11753227	11753958	hg19	chr7	50449432	50450191	hs635	negative	yes
chr11	11836360	11837998	hg19	chr7	50564242	50565706	hs2059	negative	yes
chr11	11956742	11957743	mm9	chr11	11856745	11857746	mm154	negative	yes
chr11	11961856	11962621	mm9	chr11	11861859	11862624	mm178	negative	yes
chr11	18161775	18165395	hg19	chr2	67427102	67431497	hs1565	negative	yes
chr11	18170844	18172953	hg19	chr2	67414599	67416139	hs1584	negative	yes
chr11	18356947	18358283	hg19	chr2	67281257	67282540	hs831	negative	yes
chr11	18604267	18605269	hg19	chr2	67052101	67052901	hs1244	negative	yes
chr11	18749399	18750623	hg19	chr2	66924703	66926115	hs1197	negative	yes
chr11	18916165	18918731	hg19	chr2	66762515	66765088	hs1210	negative	yes
chr11	18929401	18930771	hg19	chr2	66749539	66750931	hs1206	negative	yes
chr11	19159806	19161022	hg19	chr2	66510556	66511795	hs1110	negative	yes
chr11	19264923	19266022	hg19	chr2	66397542	66398943	hs1229	negative	yes
chr11	19349983	19351626	hg19	chr2	66297527	66299214	hs205	negative	yes
chr11	22002481	22003825	hg19	chr2	63275695	63277103	hs1066	negative	yes
chr11	22010038	22011280	hg19	chr2	63268014	63269313	hs725	negative	yes
chr11	22068164	22068902	hg19	chr2	63205928	63206656	hs1874	negative	yes
chr11	22078417	22079452	hg19	chr2	63193855	63194929	hs690	negative	yes
chr11	24015167	24017101	hg19	chr2	60855056	60856888	hs1142	negative	yes
chr11	24062087	24063577	hg19	chr2	60794812	60796264	hs1176	negative	yes
chr11	24095055	24096666	hg19	chr2	60761404	60763073	hs957	negative	yes
chr11	24312333	24314281	hg19	chr2	60516097	60518092	hs1111	negative	yes
chr11	24329868	24333909	hg19	chr2	60498057	60502013	hs1535	negative	yes
chr11	24370836	24371856	hg19	chr2	60441495	60442515	hs399	negative	yes
chr11	24427205	24428275	hg19	chr2	60352514	60353602	hs779	negative	yes
chr11	24474194	24474926	hg19	chr2	60317429	60318194	hs946	negative	yes
chr11	24484734	24486203	hg19	chr2	60297377	60299041	hs397	negative	yes
chr11	24618260	24619579	hg19	chr2	60223849	60225179	hs1120	negative	yes
chr11	24708579	24710422	hg19	chr2	60137953	60139763	hs396	negative	yes
chr11	24763883	24765510	hg19	chr2	60077064	60078749	hs822	negative	yes
chr11	24783038	24784369	hg19	chr2	60055628	60056970	hs1072	negative	yes
chr11	24839673	24841741	hg19	chr2	60005531	60007545	hs1164	negative	yes
chr11	24848029	24849347	hg19	chr2	59998338	59999656	hs1021	negative	yes
chr11	24927450	24928490	hg19	chr2	59947272	59948294	hs395	negative	yes
chr11	24976121	24978365	hg19	chr2	59894793	59896957	hs1209	negative	yes
chr11	24981421	24984197	hg19	chr2	59888700	59891476	hs1057	negative	yes
chr11	25099105	25101616	mm9	chr11	24999105	25001616	mm698	negative	yes
chr11	25113308	25113940	hg19	chr2	59746377	59746992	hs394	negative	yes
chr11	25287255	25288543	hg19	chr2	59540640	59541937	hs836	negative	yes
chr11	25356346	25357683	hg19	chr2	59476604	59477955	hs1119	negative	yes
chr11	25529956	25531890	hg19	chr2	59304974	59306893	hs975	negative	yes
chr11	25639788	25641407	hg19	chr2	59203217	59204548	hs1154	negative	yes
chr11	25644061	25645643	hg19	chr2	59198905	59200529	hs393	negative	yes
chr11	25663687	25664864	hg19	chr2	59178992	59180242	hs1181	negative	yes
chr11	25674202	25676633	hg19	chr2	59161996	59164461	hs1196	negative	yes
chr11	25703629	25705174	hg19	chr2	59133026	59134590	hs392	negative	yes
chr11	25732273	25732989	hg19	chr2	59108123	59108845	hs391	negative	yes
chr11	25736857	25738024	hg19	chr2	59102071	59103380	hs1199	negative	yes
chr11	25872525	25873791	hg19	chr2	58975738	58977115	hs1067	positive	yes
chr11	25901726	25903092	hg19	chr2	58948607	58950015	hs1113	negative	yes
chr11	25978214	25979694	hg19	chr2	58891096	58892548	hs1232	negative	yes
chr11	26005544	26007098	hg19	chr2	58859997	58861674	hs1152	positive	yes
chr11	26007937	26009347	hg19	chr2	58857680	58858956	hs1063	negative	yes
chr11	26061993	26063811	hg19	chr2	58809796	58811611	hs1018	negative	yes
chr11	26072120	26072976	hg19	chr2	58799729	58800607	hs1071	negative	yes
chr11	26099722	26100690	hg19	chr2	58770304	58771290	hs1012	negative	yes
chr11	26120372	26122139	hg19	chr2	58748340	58750140	hs1174	negative	yes
chr11	26163484	26164975	hg19	chr2	58695819	58697323	hs1076	negative	yes
chr11	26489088	26491733	mm9	chr11	26389088	26391733	mm57	positive	yes
chr11	26773589	26774876	hg19	chr2	58146107	58147489	hs937	negative	yes
chr11	26975529	26976372	hg19	chr2	57972375	57973175	hs390	negative	yes
chr11	32245270	32246411	mm9	chr11	32145270	32146411	mm101	negative	yes
chr11	32250452	32252344	mm9	chr11	32150452	32152344	mm95	negative	yes
chr11	33191799	33193113	hg19	chr5	170749163	170750485	hs596	negative	yes
chr11	33299599	33301608	hg19	chr5	170627990	170630018	hs278	negative	yes
chr11	33342867	33343783	hg19	chr5	170583493	170584421	hs829	negative	yes
chr11	33392413	33393559	hg19	chr5	170471253	170472370	hs693	negative	yes
chr11	33399829	33401077	hg19	chr5	170458792	170460097	hs608	negative	yes
chr11	33429907	33431025	hg19	chr5	170417337	170418459	hs275	negative	yes
chr11	36349885	36351181	hg19	chr5	167332346	167333651	hs274	negative	yes
chr11	44625595	44626698	hg19	chr5	158517785	158518914	hs1123	negative	yes
chr11	44634333	44635610	hg19	chr5	158508842	158510137	hs1117	negative	yes
chr11	44656476	44657870	hg19	chr5	158486120	158487498	hs1022	negative	yes
chr11	44799728	44801438	hg19	chr5	158340962	158342611	hs230	negative	yes
chr11	44903241	44904999	hg19	chr5	158227696	158229500	hs1137	negative	yes
chr11	44987162	44988463	hg19	chr5	158143424	158144725	hs813	negative	yes
chr11	45136391	45137668	hg19	chr5	158017768	158019067	hs1208	positive	yes
chr11	45388289	45390405	hg19	chr5	157752608	157754317	hs1735	negative	yes
chr11	45549893	45551316	hg19	chr5	157589029	157590477	hs1130	positive	yes
chr11	45805317	45806045	mm9	chr11	45618819	45619547	mm224	negative	yes
chr11	46201358	46203267	mm9	chr11	46014860	46016769	mm102	negative	yes
chr11	47283316	47285733	hg19	chr5	155837679	155839485	hs1813	negative	yes
chr11	51940537	51946109	hg19	chr5	133772017	133775320	hs2054	negative	yes
chr11	54056663	54059415	mm9	chr11	53870165	53872917	mm51	negative	yes
chr11	54060073	54061369	hg19	chr5	131600830	131602104	hs1449	negative	yes
chr11	54879186	54884157	mm9	chr11	54692688	54697659	mm1343	negative	yes
chr11	57650678	57652744	mm9	chr11	57464180	57466246	mm133	negative	yes
chr11	57847462	57847793	hg19	chr5	153871627	153871976	hs514	negative	yes
chr11	57927590	57931336	mm9	chr11	57741092	57744838	mm849	negative	yes
chr11	57962140	57963143	mm9	chr11	57775642	57776645	mm201	negative	yes
chr11	59992983	59996757	hg19	chr17	17439186	17444187	hs1917	negative	yes
chr11	62983404	62986950	mm9	chr11	62796906	62800452	mm62	negative	yes
chr11	64898597	64900939	hg19	chr17	13015647	13018459	hs1497	negative	yes
chr11	65208855	65210457	mm9	chr11	65022357	65023959	mm67	negative	yes
chr11	65435466	65436247	hg19	chr17	12375783	12376586	hs845	negative	yes
chr11	65648906	65651643	mm9	chr11	65462408	65465145	mm85	negative	yes
chr11	68623475	68624174	mm9	chr11	68436977	68437676	mm213	negative	yes
chr11	68637700	68640745	hg19	chr17	8583345	8585318	hs1451	negative	yes
chr11	75046157	75048337	hg19	chr17	2081998	2084289	hs924	negative	yes
chr11	75049028	75050436	hg19	chr17	2079772	2081236	hs1445	positive	yes
chr11	77422484	77424457	hg19	chr17	27994702	27996874	hs1675	negative	yes
chr11	77924762	77927516	mm9	chr11	77738264	77741018	mm1349	negative	yes
chr11	79050758	79055494	hg19	chr17	25898536	25901861	hs2072	negative	yes
chr11	81612791	81613808	hg19	chr17	32077519	32078677	hs1725	negative	yes
chr11	84376006	84377110	hg19	chr17	35474054	35475155	hs819	negative	yes
chr11	84395731	84396774	hg19	chr17	35447270	35448478	hs177	negative	yes
chr11	84481127	84482245	hg19	chr17	35336093	35337226	hs364	negative	yes
chr11	84496289	84496921	hg19	chr17	35329349	35329944	hs363	negative	yes
chr11	84725828	84726603	hg19	chr17	35057889	35058730	hs849	negative	yes
chr11	84766074	84766770	hg19	chr17	35011848	35012557	hs362	positive	yes
chr11	85712703	85714068	hg19	chr17	59328477	59330195	hs922	negative	yes
chr11	86167093	86168104	hg19	chr17	59893119	59894141	hs778	negative	yes
chr11	86570111	86571720	hg19	chr17	57934217	57936802	hs1619	negative	yes
chr11	86586196	86587829	mm9	chr11	86399698	86401331	mm127	negative	yes
chr11	86623484	86625584	hg19	chr17	57863149	57864776	hs2068	negative	yes
chr11	87422350	87423713	mm9	chr11	87235852	87237215	mm264	negative	yes
chr11	88180548	88181652	mm9	chr11	87994050	87995154	mm438	negative	yes
chr11	88274079	88276075	mm9	chr11	88087581	88089577	mm439	negative	yes
chr11	88467417	88468721	hg19	chr17	55618678	55620173	hs2371	negative	yes
chr11	88527850	88529479	mm9	chr11	88341352	88342981	mm440	negative	yes
chr11	88554791	88555816	mm9	chr11	88368293	88369318	mm441	negative	yes
chr11	89717799	89719511	hg19	chr17	54206719	54208426	hs923	negative	yes
chr11	94880928	94883811	mm9	chr11	94742242	94745125	mm568	negative	yes
chr11	95339209	95341128	hg19	chr17	47837234	47839185	hs1666	negative	yes
chr11	95355809	95358196	mm9	chr11	95217123	95219510	mm142	negative	yes
chr11	96292066	96292580	hg19	chr17	46682250	46682768	hs933	negative	yes
chr11	96741476	96742609	hg19	chr17	46226552	46227693	hs697	negative	yes
chr11	96826222	96827190	hg19	chr17	46128998	46130037	hs2066	negative	yes
chr11	96872256	96874454	mm9	chr11	96733570	96735768	mm1299	negative	yes
chr11	96883318	96887851	mm9	chr11	96744632	96749165	mm876	negative	yes
chr11	98157859	98158466	hg19	chr17	37566364	37566971	hs479	negative	yes
chr11	98339002	98339485	hg19	chr17	37774485	37774988	hs627	negative	yes
chr11	98377499	98380382	hg19	chr17	37815763	37818960	hs2162	negative	yes
chr11	98391902	98395006	hg19	chr17	37831124	37834530	hs1769	negative	yes
chr11	98747152	98751430	hg19	chr17	38224836	38229126	hs2218	negative	yes
chr11	98901653	98906641	mm9	chr11	98762967	98767955	mm1323	negative	yes
chr11	101801412	101802123	hg19	chr17	41640235	41640900	hs730	negative	yes
chr11	101829827	101831016	hg19	chr17	41668736	41669927	hs729	negative	yes
chr11	101867302	101868287	hg19	chr17	41705022	41706087	hs731	negative	yes
chr11	102363033	102364797	hg19	chr17	42343451	42345142	hs1855	negative	yes
chr11	102592757	102596210	hg19	chr17	42624802	42626014	hs1693	negative	yes
chr11	103049822	103053302	mm9	chr11	102911136	102914616	mm1384	negative	yes
chr11	104642398	104643585	hg19	chr17	45368528	45369514	hs2033	negative	yes
chr11	106134085	106135839	hg19	chr17	61751592	61755090	hs1856	negative	yes
chr11	107762173	107764184	mm9	chr11	107623487	107625498	mm1348	negative	yes
chr11	109269058	109271055	hg19	chr17	63161262	63164266	hs1517	negative	yes
chr11	111563100	111564002	mm9	chr11	111424414	111425316	mm627	positive	yes
chr11	111568522	111569439	mm9	chr11	111429836	111430753	mm628	negative	yes
chr11	111627111	111628109	mm9	chr11	111488425	111489423	mm629	negative	yes
chr11	111647327	111648996	mm9	chr11	111508641	111510310	mm630	negative	yes
chr11	111666051	111667477	mm9	chr11	111527365	111528791	mm631	negative	yes
chr11	111781021	111781954	mm9	chr11	111642335	111643268	mm632	negative	yes
chr11	111827913	111829224	hg19	chr17	68999469	69000768	hs1467	positive	yes
chr11	111961102	111962964	mm9	chr11	111822416	111824278	mm633	negative	yes
chr11	112027527	112029618	hg19	chr17	69253289	69254911	hs1489	negative	yes
chr11	112411865	112413667	mm9	chr11	112273179	112274981	mm634	positive	yes
chr11	112449529	112451421	mm9	chr11	112310843	112312735	mm1285	negative	yes
chr11	112780251	112781039	mm9	chr11	112641565	112642353	mm635	negative	yes
chr11	113013633	113014961	mm9	chr11	112874947	112876275	mm636	positive	yes
chr11	113733041	113734346	hg19	chr17	71287045	71288497	hs2375	negative	yes
chr11	113981121	113983291	hg19	chr17	71536599	71539247	hs2241	negative	yes
chr11	115670279	115671107	hg19	chr17	73347819	73348933	hs2023	negative	yes
chr11	116319003	116319995	mm9	chr11	116180317	116181309	mm339	negative	yes
chr11	117343025	117348116	mm9	chr11	117204339	117209430	mm1309	negative	yes
chr11	117865410	117867678	mm9	chr11	117726724	117728992	mm780	negative	yes
chr12	5266438	5269568	mm9	chr12	5273244	5276374	mm1338	negative	yes
chr12	8385675	8387404	hg19	chr2	20778294	20779806	hs2384	negative	yes
chr12	9337518	9339602	hg19	chr2	19774115	19776218	hs1273	positive	yes
chr12	9368204	9369316	hg19	chr2	19740634	19741760	hs1276	negative	yes
chr12	9550104	9551456	hg19	chr2	19578175	19579415	hs1290	negative	yes
chr12	12179096	12179918	mm9	chr12	12185902	12186724	mm103	negative	yes
chr12	12707412	12712118	mm9	chr12	12714218	12718924	mm1310	negative	yes
chr12	25123956	25126085	hg19	chr2	8781394	8783591	hs1527	negative	yes
chr12	25891577	25892365	hg19	chr2	7774393	7775070	hs388	positive	yes
chr12	26450825	26452318	hg19	chr2	7025512	7027025	hs2015	negative	yes
chr12	27563453	27566845	hg19	chr2	5549618	5553025	hs1496	negative	yes
chr12	28816805	28818905	hg19	chr2	3268196	3270849	hs1385	negative	yes
chr12	31309963	31311477	hg19	chr7	107587162	107588892	hs2081	positive	yes
chr12	33955274	33957221	hg19	chr7	19157694	19159713	hs1878	negative	yes
chr12	33964467	33967814	hg19	chr7	19146921	19150251	hs1880	negative	yes
chr12	34199631	34200877	hg19	chr7	18885971	18887230	hs644	positive	yes
chr12	34215261	34216362	hg19	chr7	18874272	18875369	hs2307	positive	yes
chr12	34219670	34221315	hg19	chr7	18868716	18870405	hs2306	positive	yes
chr12	36793077	36795300	hg19	chr7	16043133	16045391	hs1740	negative	yes
chr12	38435535	38436645	hg19	chr7	14379627	14380740	hs816	negative	yes
chr12	39301105	39302162	hg19	chr7	13506207	13507276	hs550	negative	yes
chr12	39341790	39342580	hg19	chr7	13450920	13451719	hs749	negative	yes
chr12	44402519	44405770	mm9	chr12	45503506	45506757	mm16	negative	yes
chr12	46020363	46021772	hg19	chr14	26377372	26378803	hs428	negative	yes
chr12	47464984	47466845	hg19	chr14	27553786	27555661	hs1127	negative	yes
chr12	48010973	48011714	hg19	chr14	28036097	28036839	hs736	negative	yes
chr12	48388113	48389934	hg19	chr14	28398563	28400621	hs1075	negative	yes
chr12	48634484	48635346	hg19	chr14	28599596	28600469	hs604	negative	yes
chr12	49374506	49376068	hg19	chr14	29226075	29227673	hs1064	negative	yes
chr12	49510396	49511504	hg19	chr14	29365021	29366135	hs539	negative	yes
chr12	49886734	49888068	hg19	chr14	29613303	29614728	hs944	negative	yes
chr12	49944709	49946539	hg19	chr14	29684896	29686744	hs566	negative	yes
chr12	49973353	49975979	hg19	chr14	29710885	29713340	hs1539	negative	yes
chr12	49991792	49994219	hg19	chr14	29743374	29745881	hs1168	negative	yes
chr12	50119060	50121598	hg19	chr14	29857930	29860548	hs1523	negative	yes
chr12	50157459	50158808	hg19	chr14	29894197	29895582	hs1193	negative	yes
chr12	50171720	50172961	hg19	chr14	29911320	29912514	hs1201	negative	yes
chr12	50190555	50191885	hg19	chr14	29927484	29928818	hs598	negative	yes
chr12	50260206	50261402	hg19	chr14	29960491	29962005	hs1062	negative	yes
chr12	50294630	50296354	hg19	chr14	29997171	29998891	hs555	negative	yes
chr12	50970036	50971348	hg19	chr14	30712025	30713336	hs343	negative	yes
chr12	51001401	51003291	hg19	chr14	30741750	30743626	hs433	negative	yes
chr12	51274163	51276029	hg19	chr14	30989066	30990943	hs791	negative	yes
chr12	52228848	52229426	mm9	chr12	53329835	53330413	mm292	negative	yes
chr12	52833658	52837423	hg19	chr14	32940050	32944094	hs1647	negative	yes
chr12	53623550	53625385	hg19	chr14	33818699	33820785	hs527	negative	yes
chr12	53663102	53665614	mm9	chr12	54764089	54766601	mm701	negative	yes
chr12	53872242	53873017	hg19	chr14	34068299	34069069	hs345	negative	yes
chr12	53874311	53876622	mm9	chr12	54975298	54977609	mm1188	negative	yes
chr12	53926314	53927018	hg19	chr14	34122328	34123032	hs346	negative	yes
chr12	54000471	54001518	hg19	chr14	34202106	34203129	hs347	negative	yes
chr12	54161495	54163193	hg19	chr14	34385301	34386834	hs1676	negative	yes
chr12	54532609	54534941	mm9	chr12	55633596	55635928	mm506	negative	yes
chr12	55614270	55615258	hg19	chr14	36020024	36020998	hs348	negative	yes
chr12	55643542	55644223	hg19	chr14	36042961	36043666	hs349	negative	yes
chr12	56114128	56116274	hg19	chr14	36581685	36583834	hs350	negative	yes
chr12	56386862	56388474	hg19	chr14	36814302	36815937	hs592	negative	yes
chr12	56440796	56441827	hg19	chr14	36893320	36894326	hs879	negative	yes
chr12	56454748	56456277	hg19	chr14	36907561	36909195	hs984	negative	yes
chr12	56458078	56460488	hg19	chr14	36911162	36914360	hs1538	negative	yes
chr12	56481967	56483344	hg19	chr14	36933150	36934532	hs704	negative	yes
chr12	56520183	56521029	hg19	chr14	36973775	36974585	hs1166	negative	yes
chr12	57291377	57292384	hg19	chr14	37726340	37727348	hs593	negative	yes
chr12	71532268	71534767	mm9	chr12	72633255	72635754	mm795	negative	yes
chr12	73050612	73052572	hg19	chr14	61120199	61122451	hs1602	negative	yes
chr12	79505603	79509359	hg19	chr14	68605699	68608457	hs1474	negative	yes
chr12	79535235	79536539	hg19	chr14	68634843	68636060	hs1392	positive	yes
chr12	79731439	79734658	hg19	chr14	68842757	68845775	hs1688	negative	yes
chr12	79795794	79798372	mm9	chr12	80896781	80899359	mm1393	negative	yes
chr12	79846272	79849070	hg19	chr14	68976404	68979383	hs1616	positive	yes
chr12	79968630	79971892	mm9	chr12	81069617	81072879	mm1359	negative	yes
chr12	83072395	83074413	mm9	chr12	84173382	84175400	mm78	negative	yes
chr12	83720783	83721675	hg19	chr14	73645468	73648977	hs2156	negative	yes
chr12	84175691	84176743	mm9	chr12	85516641	85517693	mm529	negative	yes
chr12	85435375	85436988	hg19	chr14	75703373	75705053	hs1657	negative	yes
chr12	85454385	85456659	hg19	chr14	75724424	75726998	hs1481	negative	yes
chr12	86800572	86803602	hg19	chr14	77384641	77387697	hs1466	positive	yes
chr12	86810598	86813301	mm9	chr12	88151548	88154251	mm336	negative	yes
chr12	86815545	86817582	hg19	chr14	77402795	77405507	hs1624	negative	yes
chr12	86894665	86899694	hg19	chr14	77506871	77511353	hs1903	negative	yes
chr12	88983898	88984926	mm9	chr12	90222342	90223370	mm296	negative	yes
chr12	90131977	90133515	hg19	chr14	80095739	80097310	hs1369	negative	yes
chr12	91677577	91681083	mm9	chr12	92916017	92919523	mm815	negative	yes
chr12	99338620	99341271	mm9	chr12	100576830	100579481	mm12	negative	yes
chr12	104900833	104902741	hg19	chr14	95836414	95839481	hs1486	positive	yes
chr12	104939330	104940069	mm9	chr12	106177540	106178279	mm6	negative	yes
chr12	106377315	106378522	hg19	chr14	97762544	97763744	hs352	negative	yes
chr12	106479344	106480241	hg19	chr14	97879188	97880071	hs353	negative	yes
chr12	107777919	107778911	hg19	chr14	99466200	99467144	hs622	negative	yes
chr12	108249507	108252884	hg19	chr14	100039652	100044326	hs1931	negative	yes
chr12	109507924	109510969	mm9	chr12	110746134	110749179	mm799	negative	yes
chr12	111142738	111143613	mm9	chr12	112380949	112381824	mm3	negative	yes
chr12	117805674	117806847	hg19	chr7	22091362	22092557	hs807	negative	yes
chr12	117989131	117989690	hg19	chr7	21811370	21812002	hs294	negative	yes
chr12	118499994	118501066	hg19	chr7	21239775	21240922	hs1223	negative	yes
chr12	118647248	118648362	hg19	chr7	21084342	21085460	hs701	negative	yes
chr12	118650489	118651733	hg19	chr7	21080801	21082086	hs1226	negative	yes
chr12	118702748	118704294	hg19	chr7	21019551	21021200	hs1148	positive	yes
chr12	118719669	118721136	hg19	chr7	21003280	21004750	hs110	negative	yes
chr12	118725450	118726904	hg19	chr7	20997668	20999102	hs1007	negative	yes
chr12	118834481	118836077	hg19	chr7	20838843	20840395	hs1019	negative	yes
chr12	118840045	118841445	hg19	chr7	20832628	20833902	hs844	negative	yes
chr12	118843463	118844557	hg19	chr7	20829390	20830407	hs239	negative	yes
chr13	3726204	3727216	hg19	chr10	5627988	5629809	hs2420	negative	yes
chr13	3741069	3744545	mm9	chr13	3740315	3743791	mm41	negative	yes
chr13	5840306	5842325	hg19	chr10	3851587	3853863	hs1837	positive	yes
chr13	12113964	12115326	hg19	chr1	237192467	237195956	hs2139	negative	yes
chr13	12124820	12128580	hg19	chr1	237174518	237176845	hs2138	negative	yes
chr13	12131485	12133920	hg19	chr1	237160612	237163517	hs2137	negative	yes
chr13	12365828	12370427	hg19	chr1	236802183	236804214	hs2134	negative	yes
chr13	12502078	12504879	mm9	chr13	12594345	12597146	mm1376	negative	yes
chr13	15154945	15158128	hg19	chr7	42532168	42534364	hs2079	negative	yes
chr13	15301054	15302136	hg19	chr7	42432266	42433365	hs1132	negative	yes
chr13	15342707	15344222	mm9	chr13	15434540	15436055	mm1179	positive	yes
chr13	15485451	15487169	hg19	chr7	42252831	42254560	hs1213	negative	yes
chr13	15543031	15545008	hg19	chr7	42191728	42193638	hs111	negative	yes
chr13	15548975	15550833	hg19	chr7	42185602	42187508	hs1586	positive	yes
chr13	15664354	15665305	mm9	chr13	15756187	15757138	mm652	negative	yes
chr13	16011020	16012852	mm9	chr13	16102853	16104685	mm653	negative	yes
chr13	21973105	21976611	mm9	chr13	22064974	22068480	mm743	negative	yes
chr13	26153954	26156127	hg19	chr6	23180012	23182186	hs1352	negative	yes
chr13	28415133	28417929	hg19	chr6	22148574	22151387	hs1335	negative	yes
chr13	28717646	28719441	mm9	chr13	28809515	28811310	mm265	negative	yes
chr13	28958080	28960360	hg19	chr6	21586846	21589522	hs1972	negative	yes
chr13	29609187	29611830	hg19	chr6	20867105	20870529	hs1340	negative	yes
chr13	34148088	34150183	hg19	chr6	3246856	3249920	hs2234	negative	yes
chr13	34247186	34249843	hg19	chr6	3349397	3352257	hs1391	negative	yes
chr13	34285394	34290493	mm9	chr13	34377263	34382362	mm1307	negative	yes
chr13	34827566	34828899	mm9	chr13	34919435	34920768	mm180	negative	yes
chr13	35212314	35213577	hg19	chr6	4358582	4359930	hs2060	negative	yes
chr13	37877818	37879534	hg19	chr6	7163950	7166054	hs2061	negative	yes
chr13	38170603	38171728	hg19	chr6	7561160	7562735	hs2191	negative	yes
chr13	39523268	39524849	hg19	chr6	9095334	9096985	hs1315	positive	yes
chr13	39876693	39879433	mm9	chr13	39972062	39974802	mm1403	negative	yes
chr13	40712299	40713499	hg19	chr6	10393875	10395072	hs279	negative	yes
chr13	40725554	40728254	hg19	chr6	10407432	10410045	hs1252	negative	yes
chr13	41643212	41644683	mm9	chr13	41738581	41740052	mm192	negative	yes
chr13	42258101	42259051	mm9	chr13	42353470	42354420	mm235	negative	yes
chr13	43195920	43197079	mm9	chr13	43291289	43292448	mm193	negative	yes
chr13	44911671	44913085	hg19	chr6	15508843	15511338	hs2049	negative	yes
chr13	46571320	46574349	mm9	chr13	46666689	46669718	mm132	negative	yes
chr13	46632291	46635792	mm9	chr13	46727660	46731161	mm813	negative	yes
chr13	46735395	46736634	hg19	chr6	17714698	17716584	hs2067	negative	yes
chr13	46884783	46885858	hg19	chr6	17931980	17933492	hs2405	negative	yes
chr13	47310584	47312217	hg19	chr6	18536628	18538267	hs1052	negative	yes
chr13	47367148	47369939	hg19	chr6	18612650	18614840	hs1580	negative	yes
chr13	47397122	47398796	hg19	chr6	18662790	18664038	hs1094	negative	yes
chr13	48012107	48014217	hg19	chr6	19533421	19535679	hs1542	negative	yes
chr13	48158420	48162088	hg19	chr6	19719222	19722910	hs1533	negative	yes
chr13	48383545	48384932	hg19	chr6	19976157	19977513	hs1175	negative	yes
chr13	48565958	48567063	mm9	chr13	48661327	48662432	mm939	negative	yes
chr13	48716450	48718010	mm9	chr13	48811819	48813379	mm625	negative	yes
chr13	48779624	48781302	mm9	chr13	48874993	48876671	mm922	negative	yes
chr13	51220265	51222697	mm9	chr13	51315634	51318066	mm1300	positive	yes
chr13	51920205	51921621	hg19	chr9	92292484	92293889	hs1339	positive	yes
chr13	53463204	53464850	hg19	chr5	174160174	174161834	hs1256	positive	yes
chr13	55404357	55406967	hg19	chr5	176816376	176819189	hs2229	negative	yes
chr13	55816415	55818354	hg19	chr5	134355508	134357399	hs1594	negative	yes
chr13	56159019	56161187	hg19	chr5	134769599	134772144	hs1473	positive	yes
chr13	59090184	59094158	mm9	chr13	59191545	59195519	mm14	negative	yes
chr13	60145681	60149199	mm9	chr13	60247042	60250560	mm745	positive	yes
chr13	60267007	60270395	hg19	chr9	89648350	89651598	hs1463	positive	yes
chr13	63554160	63555734	hg19	chr9	98257859	98259405	hs1258	negative	yes
chr13	63568917	63569745	hg19	chr9	98274342	98275314	hs1417	negative	yes
chr13	64205082	64205636	hg19	chr9	99277745	99278295	hs2305	negative	yes
chr13	68571528	68575350	mm9	chr13	68710405	68714227	mm1330	negative	yes
chr13	72028467	72029900	hg19	chr5	3511978	3513399	hs261	negative	yes
chr13	72264954	72266325	hg19	chr5	3226121	3227484	hs180	negative	yes
chr13	72288438	72289483	hg19	chr5	3197865	3198942	hs754	negative	yes
chr13	72297849	72299336	hg19	chr5	3186439	3187926	hs533	negative	yes
chr13	72302373	72303423	hg19	chr5	3182218	3183271	hs603	negative	yes
chr13	72305069	72305868	hg19	chr5	3179614	3180432	hs900	negative	yes
chr13	73033139	73036183	hg19	chr5	2204457	2208380	hs1327	negative	yes
chr13	73116618	73118033	hg19	chr5	2112055	2113430	hs633	negative	yes
chr13	73298274	73300313	mm9	chr13	73435722	73437761	mm68	negative	yes
chr13	77396355	77397885	hg19	chr5	93649881	93651432	hs273	negative	yes
chr13	77489934	77491150	hg19	chr5	93575407	93576629	hs272	negative	yes
chr13	77546465	77549738	mm9	chr13	77685726	77688999	mm881	negative	yes
chr13	77892213	77893534	hg19	chr5	93226985	93228322	hs271	negative	yes
chr13	78323866	78325615	hg19	chr5	92811465	92813217	hs546	positive	yes
chr13	78444588	78447859	hg19	chr5	92741502	92744743	hs1550	negative	yes
chr13	78580585	78582513	hg19	chr5	92634702	92636476	hs1172	negative	yes
chr13	78600966	78603745	hg19	chr5	92613862	92616844	hs1060	negative	yes
chr13	78657999	78659031	hg19	chr5	92536353	92537380	hs1222	negative	yes
chr13	78677946	78679173	hg19	chr5	92526066	92527353	hs1170	negative	yes
chr13	78716136	78718956	hg19	chr5	92476842	92479105	hs1560	negative	yes
chr13	78799153	78800926	hg19	chr5	92426546	92428433	hs1146	negative	yes
chr13	78935866	78937115	hg19	chr5	92314781	92316083	hs1049	negative	yes
chr13	78937243	78939010	hg19	chr5	92312840	92314645	hs1024	negative	yes
chr13	79046726	79047913	hg19	chr5	92219848	92221133	hs1153	negative	yes
chr13	79136178	79138028	hg19	chr5	92141511	92143537	hs1079	negative	yes
chr13	79272750	79274245	hg19	chr5	92035493	92036961	hs1155	negative	yes
chr13	79276256	79278385	hg19	chr5	92031088	92033197	hs1039	positive	yes
chr13	79344818	79346718	hg19	chr5	91970162	91972034	hs971	negative	yes
chr13	79363795	79364869	hg19	chr5	91940922	91942042	hs1109	positive	yes
chr13	79387207	79390321	hg19	chr5	91927845	91931024	hs1577	negative	yes
chr13	79550328	79551468	hg19	chr5	91828131	91829295	hs1162	negative	yes
chr13	79592241	79593126	hg19	chr5	91803813	91804707	hs557	negative	yes
chr13	79672965	79673969	hg19	chr5	91765018	91766129	hs1084	negative	yes
chr13	79784603	79786015	hg19	chr5	91700124	91701467	hs1034	negative	yes
chr13	79999669	80001750	hg19	chr5	91442456	91444549	hs952	negative	yes
chr13	80172719	80173904	hg19	chr5	91318623	91319730	hs806	negative	yes
chr13	80194997	80195885	hg19	chr5	91299247	91300165	hs710	negative	yes
chr13	80196158	80196966	hg19	chr5	91298184	91298993	hs682	negative	yes
chr13	80235008	80236098	hg19	chr5	91271776	91272886	hs1227	negative	yes
chr13	80333813	80334641	hg19	chr5	91194524	91195362	hs613	negative	yes
chr13	80513988	80516011	hg19	chr5	91036888	91038899	hs191	negative	yes
chr13	80622908	80623515	hg19	chr5	90928612	90929226	hs269	negative	yes
chr13	80756721	80758240	hg19	chr5	90785763	90787167	hs982	negative	yes
chr13	80788038	80789708	hg19	chr5	90768370	90769843	hs989	negative	yes
chr13	82971259	82972347	hg19	chr5	88673410	88674494	hs789	negative	yes
chr13	83132396	83134520	hg19	chr5	88548400	88550500	hs503	negative	yes
chr13	83523875	83524382	hg19	chr5	88179457	88179988	hs429	negative	yes
chr13	84059504	84060616	hg19	chr5	87692154	87693265	hs268	negative	yes
chr13	84570409	84572168	hg19	chr5	87239942	87241645	hs267	negative	yes
chr13	84638984	84639971	hg19	chr5	87168414	87169433	hs266	negative	yes
chr13	84751365	84753075	hg19	chr5	87083012	87084752	hs853	negative	yes
chr13	84781785	84785966	mm9	chr13	84921390	84925571	mm1334	negative	yes
chr13	91186994	91190170	hg19	chr5	81318882	81321683	hs1432	positive	yes
chr13	94595530	94597247	hg19	chr5	77267384	77269206	hs265	negative	yes
chr13	94701861	94702913	hg19	chr5	77147580	77148599	hs264	negative	yes
chr13	94705528	94708909	hg19	chr5	77141743	77145131	hs1783	negative	yes
chr13	94709855	94710892	hg19	chr5	77139721	77140742	hs263	negative	yes
chr13	94816165	94818069	hg19	chr5	77020605	77022508	hs172	negative	yes
chr13	94868896	94869433	hg19	chr5	76940836	76941396	hs262	negative	yes
chr13	94873845	94874878	hg19	chr5	76935225	76936266	hs695	negative	yes
chr13	105537275	105539272	mm9	chr13	106327355	106329352	mm5	negative	yes
chr13	111345678	111346779	hg19	chr5	56678793	56679854	hs2057	negative	yes
chr13	111952900	111955571	mm9	chr13	112743108	112745779	mm45	positive	yes
chr13	111989321	111993363	hg19	chr5	55896173	55899069	hs1638	negative	yes
chr13	113243521	113248071	hg19	chr5	54237176	54239729	hs1820	negative	yes
chr13	115686619	115688040	mm9	chr13	116476827	116478248	mm933	negative	yes
chr13	115976804	115978242	hg19	chr5	50960132	50961567	hs543	negative	yes
chr13	116086722	116088319	hg19	chr5	50854444	50856213	hs1419	negative	yes
chr13	116278491	116280025	hg19	chr5	50707567	50709204	hs509	negative	yes
chr13	116497242	116498254	hg19	chr5	50481472	50482478	hs586	negative	yes
chr13	116514003	116515995	hg19	chr5	50467950	50469989	hs1321	negative	yes
chr13	116575050	116576419	hg19	chr5	50390899	50392257	hs1187	negative	yes
chr13	116632749	116634333	hg19	chr5	50335050	50336643	hs215	negative	yes
chr13	118515838	118517025	mm9	chr13	119304645	119305832	mm463	negative	yes
chr13	118713611	118715013	hg19	chr5	44389166	44390467	hs516	positive	yes
chr13	118735524	118737413	mm9	chr13	119524331	119526220	mm917	positive	yes
chr13	118805891	118807124	mm9	chr13	119594698	119595931	mm918	negative	yes
chr13	118893846	118894760	mm9	chr13	119682653	119683567	mm606	negative	yes
chr14	11775621	11779078	hg19	chr3	61793891	61797865	hs2098	negative	yes
chr14	12337474	12338440	hg19	chr3	62350726	62351718	hs434	negative	yes
chr14	12346491	12347182	hg19	chr3	62359866	62360569	hs435	negative	yes
chr14	12392521	12394811	hg19	chr3	62405817	62408099	hs1316	negative	yes
chr14	13770325	13771435	hg19	chr3	63672828	63674786	hs1387	negative	yes
chr14	21252003	21253228	hg19	chr10	76177765	76179000	hs595	negative	yes
chr14	21462243	21463695	hg19	chr10	76513161	76514681	hs1500	positive	yes
chr14	21853194	21853685	mm9	chr14	22672416	22672907	mm413	negative	yes
chr14	21865850	21867377	hg19	chr10	77021198	77022845	hs1437	positive	yes
chr14	21966828	21968239	hg19	chr10	77138246	77139684	hs319	negative	yes
chr14	21990859	21991990	hg19	chr10	77164564	77165639	hs484	positive	yes
chr14	22113215	22115951	mm9	chr14	22932437	22935173	mm414	positive	yes
chr14	22457274	22458561	hg19	chr10	77683451	77684636	hs795	negative	yes
chr14	22505360	22506121	hg19	chr10	77726861	77727618	hs320	negative	yes
chr14	22576141	22579755	hg19	chr10	77793903	77797889	hs1679	negative	yes
chr14	22744936	22746392	hg19	chr10	77989996	77991469	hs321	negative	yes
chr14	22780722	22784636	hg19	chr10	78039254	78043785	hs1678	negative	yes
chr14	22906034	22908415	hg19	chr10	78156517	78158752	hs1683	negative	yes
chr14	23040563	23041478	hg19	chr10	78301864	78302766	hs815	negative	yes
chr14	23094627	23095917	hg19	chr10	78390590	78391875	hs748	negative	yes
chr14	23400710	23402961	mm9	chr14	24219932	24222183	mm932	negative	yes
chr14	23486013	23486602	mm9	chr14	24305235	24305824	mm415	negative	yes
chr14	23493824	23494811	mm9	chr14	24313046	24314033	mm416	negative	yes
chr14	23520146	23521598	mm9	chr14	24339368	24340820	mm417	negative	yes
chr14	24616741	24620772	hg19	chr10	79935570	79940095	hs2223	negative	yes
chr14	24647084	24649277	hg19	chr10	79972390	79977332	hs1974	negative	yes
chr14	24649772	24652271	mm9	chr14	25468997	25471496	mm794	negative	yes
chr14	24985263	24987167	hg19	chr10	80295449	80297087	hs1491	positive	yes
chr14	25524623	25526558	mm9	chr14	26344109	26346044	mm223	negative	yes
chr14	25584835	25588921	hg19	chr10	80980316	80984042	hs1767	negative	yes
chr14	27367009	27367960	hg19	chr3	56802413	56804092	hs1512	negative	yes
chr14	28501107	28502535	hg19	chr3	55524543	55526260	hs1472	negative	yes
chr14	28972335	28973646	hg19	chr3	55017475	55018560	hs1436	positive	yes
chr14	31232335	31234714	hg19	chr3	52461982	52465131	hs2179	negative	yes
chr14	32598254	32599722	hg19	chr10	50603805	50605254	hs318	negative	yes
chr14	32770675	32771522	hg19	chr10	50413448	50414305	hs753	negative	yes
chr14	45825150	45827947	hg19	chr14	53833457	53836210	hs1151	positive	yes
chr14	45943840	45945127	mm9	chr14	46563515	46564802	mm384	positive	yes
chr14	46017040	46020810	hg19	chr14	54035953	54040896	hs1629	negative	yes
chr14	46223997	46224959	mm9	chr14	46843672	46844634	mm385	negative	yes
chr14	46247450	46249128	mm9	chr14	46867125	46868803	mm386	negative	yes
chr14	46386734	46387665	hg19	chr14	54419578	54420499	hs2324	negative	yes
chr14	46605651	46606520	hg19	chr14	54687583	54688495	hs1414	positive	yes
chr14	46610670	46611777	mm9	chr14	47230345	47231452	mm387	negative	yes
chr14	48707510	48711185	hg19	chr14	57320664	57324319	hs1579	negative	yes
chr14	48799224	48801650	hg19	chr14	57419008	57421445	hs1150	negative	yes
chr14	48814603	48816118	hg19	chr14	57430887	57432346	hs1218	negative	yes
chr14	48852340	48856614	hg19	chr14	57474144	57478090	hs1791	negative	yes
chr14	52547407	52549170	hg19	chr14	22171275	22173297	hs1705	negative	yes
chr14	54938004	54941428	hg19	chr14	23847667	23850830	hs2153	negative	yes
chr14	54996106	54997707	hg19	chr14	23906587	23908214	hs1670	negative	yes
chr14	55003667	55004830	hg19	chr14	23911613	23912923	hs2330	negative	yes
chr14	60552726	60556031	mm9	chr14	61171563	61174868	mm1122	negative	yes
chr14	61004739	61005741	mm9	chr14	61623576	61624578	mm7	negative	yes
chr14	63062164	63063066	mm9	chr14	63681001	63681903	mm244	negative	yes
chr14	63206722	63207170	hg19	chr8	11604182	11604695	hs508	negative	yes
chr14	63367789	63369845	mm9	chr14	63986626	63988682	mm245	negative	yes
chr14	65245074	65246193	hg19	chr8	28370867	28371860	hs1329	negative	yes
chr14	65749306	65750500	hg19	chr8	27752440	27753351	hs1741	positive	yes
chr14	67361025	67362565	hg19	chr8	25775160	25776669	hs231	negative	yes
chr14	69522690	69523937	mm9	chr14	69922497	69923744	mm181	negative	no
chr14	69536074	69537250	mm9	chr14	69935881	69937057	mm215	negative	no
chr14	70634499	70635319	hg19	chr8	21907426	21908282	hs781	negative	yes
chr14	70639991	70641194	hg19	chr8	21901089	21902326	hs782	negative	yes
chr14	70683795	70684840	hg19	chr8	21845388	21846455	hs783	positive	yes
chr14	73233956	73236326	mm9	chr14	73633763	73636133	mm1341	positive	yes
chr14	78287852	78289553	hg19	chr13	43167371	43169597	hs1393	negative	yes
chr14	89862491	89863428	hg19	chr13	63681506	63682317	hs614	negative	yes
chr14	91108402	91109355	hg19	chr13	65102774	65103757	hs874	negative	yes
chr14	92678515	92679505	hg19	chr13	66609799	66610748	hs881	negative	yes
chr14	94521150	94522546	hg19	chr13	68429117	68430526	hs575	negative	yes
chr14	97086235	97087505	hg19	chr13	71343609	71344868	hs126	positive	yes
chr14	97100876	97102241	hg19	chr13	71358093	71359507	hs540	negative	yes
chr14	97329515	97330680	hg19	chr13	71533037	71534195	hs882	negative	yes
chr14	97488749	97491425	hg19	chr13	71722458	71724962	hs128	negative	yes
chr14	97537587	97538095	hg19	chr13	71774848	71775368	hs129	negative	yes
chr14	97559884	97561752	hg19	chr13	71793422	71795334	hs136	negative	yes
chr14	97840336	97840805	hg19	chr13	72063376	72063816	hs339	negative	yes
chr14	98018788	98020055	hg19	chr13	72255836	72257039	hs182	negative	yes
chr14	98046622	98048648	hg19	chr13	72300849	72302934	hs137	negative	yes
chr14	98072482	98073981	hg19	chr13	72333516	72334988	hs619	negative	yes
chr14	98082963	98085270	hg19	chr13	72345980	72348230	hs188	negative	yes
chr14	98154698	98157214	hg19	chr13	72425787	72428335	hs138	negative	yes
chr14	98422637	98423400	hg19	chr13	72668699	72669457	hs432	negative	yes
chr14	98448375	98450139	hg19	chr13	72693676	72695292	hs140	negative	yes
chr14	98533924	98535402	hg19	chr13	72768988	72770449	hs747	negative	yes
chr14	98536184	98538781	hg19	chr13	72771271	72773876	hs131	negative	yes
chr14	98683223	98684855	hg19	chr13	72938917	72940565	hs176	negative	yes
chr14	98748098	98751239	hg19	chr13	73001083	73003053	hs141	negative	yes
chr14	98765363	98766176	hg19	chr13	73006141	73006976	hs132	negative	yes
chr14	98819484	98820234	hg19	chr13	73067601	73068380	hs133	negative	yes
chr14	98830064	98831289	hg19	chr13	73078567	73079883	hs134	negative	yes
chr14	98832300	98834612	hg19	chr13	73081447	73083754	hs142	positive	yes
chr14	98838461	98840576	hg19	chr13	73087012	73088821	hs143	negative	yes
chr14	98894511	98895418	hg19	chr13	73149054	73150028	hs135	negative	yes
chr14	98958352	98959867	hg19	chr13	73224400	73225906	hs144	negative	yes
chr14	103763360	103764966	hg19	chr13	78406128	78407714	hs1394	negative	yes
chr14	104190395	104191968	hg19	chr13	78866759	78868299	hs715	negative	yes
chr14	104297360	104298672	hg19	chr13	78976015	78977338	hs915	positive	yes
chr14	104834243	104835529	hg19	chr13	79572260	79573591	hs823	negative	yes
chr14	105376563	105379035	hg19	chr13	80232246	80234630	hs1471	positive	yes
chr14	118193836	118195430	hg19	chr13	95313852	95315441	hs796	negative	yes
chr14	118229617	118231411	hg19	chr13	95358263	95360017	hs488	negative	yes
chr14	118435485	118436834	hg19	chr13	95618464	95619819	hs341	negative	yes
chr14	122253729	122258284	hg19	chr13	100338445	100342077	hs1444	negative	yes
chr15	7422224	7423664	hg19	chr10	134442029	134446812	hs1763	negative	yes
chr15	13391894	13395636	mm9	chr15	13321649	13325391	mm13	positive	yes
chr15	27783861	27785191	hg19	chr5	14444355	14446026	hs1513	negative	yes
chr15	30511450	30513962	mm9	chr15	30441205	30443717	mm1400	negative	yes
chr15	34828818	34829716	hg19	chr8	99428481	99429432	hs908	negative	yes
chr15	35532217	35534804	mm9	chr15	35461972	35464559	mm703	positive	yes
chr15	35747988	35749219	hg19	chr8	100680409	100681809	hs909	negative	yes
chr15	37052172	37055037	mm9	chr15	36981927	36984792	mm31	negative	yes
chr15	40255720	40257011	hg19	chr8	105880860	105882147	hs648	negative	yes
chr15	40354034	40356272	hg19	chr8	105961524	105963694	hs425	negative	yes
chr15	40475259	40476782	hg19	chr8	106101923	106103435	hs804	negative	yes
chr15	40657862	40659260	hg19	chr8	106333530	106334859	hs195	negative	yes
chr15	40911362	40915891	hg19	chr8	106602865	106607408	hs1800	negative	yes
chr15	40923867	40924925	hg19	chr8	106611425	106612483	hs768	negative	yes
chr15	41039704	41041015	hg19	chr8	106744003	106745324	hs716	negative	yes
chr15	50664833	50666650	hg19	chr8	116430695	116432527	hs919	positive	yes
chr15	52334869	52335444	mm9	chr15	52166424	52166999	mm2	negative	yes
chr15	56165722	56167474	hg19	chr8	122076654	122078139	hs1482	positive	yes
chr15	60852996	60854287	mm9	chr15	60684551	60685842	mm642	positive	yes
chr15	61157637	61158731	mm9	chr15	60989192	60990286	mm641	negative	yes
chr15	62902694	62903900	mm9	chr15	62734249	62735455	mm457	negative	yes
chr15	63052414	63053178	hg19	chr8	129987805	129988581	hs1877	positive	yes
chr15	63065702	63067611	mm9	chr15	62897257	62899166	mm73	negative	yes
chr15	63193937	63194788	mm9	chr15	63025492	63026343	mm458	positive	yes
chr15	63339170	63341718	hg19	chr8	130252377	130254551	hs1708	negative	yes
chr15	63674092	63676818	hg19	chr8	130644090	130647317	hs1709	negative	yes
chr15	66824301	66827162	mm9	chr15	66655863	66658724	mm104	negative	yes
chr15	67142033	67143636	mm9	chr15	66973595	66975198	mm105	negative	yes
chr15	67245067	67247938	hg19	chr8	134681048	134683216	hs1400	negative	yes
chr15	73739611	73747146	hg19	chr8	142421347	142426352	hs1882	negative	yes
chr15	75646709	75649708	mm9	chr15	75477139	75480138	mm1304	negative	yes
chr15	75834812	75835772	hg19	chr8	144613510	144614569	hs558	negative	yes
chr15	76402681	76404351	hg19	chr8	145235516	145237210	hs2075	negative	yes
chr15	77006899	77009163	hg19	chr22	35982681	35987358	hs1913	negative	yes
chr15	77036640	77038764	mm9	chr15	76867070	76869194	mm106	negative	yes
chr15	77089079	77090092	hg19	chr22	36145691	36146713	hs581	negative	yes
chr15	79163841	79164236	hg19	chr22	38379933	38380307	hs517	negative	yes
chr15	79165517	79166323	hg19	chr22	38381623	38382457	hs564	negative	yes
chr15	79173761	79174273	hg19	chr22	38392037	38392599	hs496	negative	yes
chr15	79175822	79176550	hg19	chr22	38394345	38395199	hs486	negative	yes
chr15	79208803	79209777	hg19	chr22	38429240	38430515	hs491	negative	yes
chr15	79218952	79220098	hg19	chr22	38442140	38442879	hs492	negative	yes
chr15	79223635	79224085	hg19	chr22	38446392	38446997	hs490	negative	yes
chr15	79323554	79324112	mm9	chr15	79153984	79154542	mm191	negative	yes
chr15	83523008	83524071	hg19	chr22	43496327	43497816	hs1731	negative	yes
chr15	83638828	83640718	mm9	chr15	83469258	83471148	mm84	positive	yes
chr15	84217537	84220713	mm9	chr15	84047967	84051143	mm91	negative	yes
chr15	85464143	85464949	hg19	chr22	46240915	46242300	hs1559	negative	yes
chr15	86112646	86114946	hg19	chr22	47048605	47050100	hs2349	negative	yes
chr15	92514399	92515071	hg19	chr12	41749027	41749727	hs337	negative	yes
chr15	99807076	99809694	mm9	chr15	99637507	99640125	mm17	negative	yes
chr15	102694217	102694945	hg19	chr12	54090636	54091341	hs338	negative	yes
chr15	102999797	103002958	hg19	chr12	54412238	54415445	hs2078	negative	yes
chr15	103013812	103014964	hg19	chr12	54426638	54427789	hs1875	negative	yes
chr16	5663673	5664669	hg19	chr16	5791187	5792173	hs941	negative	yes
chr16	6366003	6367236	hg19	chr16	6548841	6550064	hs90	negative	yes
chr16	7106399	7107046	hg19	chr16	7418980	7419830	hs88	negative	yes
chr16	7119721	7120895	hg19	chr16	7431988	7433156	hs91	negative	yes
chr16	7407163	7408866	hg19	chr16	7758525	7759863	hs87	negative	yes
chr16	7520398	7521914	hg19	chr16	7886533	7888033	hs92	negative	yes
chr16	7805277	7806470	hg19	chr16	8133046	8134289	hs93	negative	yes
chr16	7945941	7947658	hg19	chr16	8238189	8239787	hs107	negative	yes
chr16	8198308	8199509	hg19	chr16	8431303	8432558	hs94	negative	yes
chr16	8223606	8224476	hg19	chr16	8458833	8459721	hs920	negative	yes
chr16	10051118	10051975	hg19	chr16	10319829	10320876	hs1242	negative	yes
chr16	15052403	15053743	hg19	chr8	49494150	49495734	hs1431	positive	yes
chr16	15054450	15055590	mm9	chr16	15054543	15055683	mm382	negative	yes
chr16	15084592	15085708	mm9	chr16	15084685	15085801	mm466	positive	yes
chr16	15194413	15196116	mm9	chr16	15194506	15196209	mm383	negative	yes
chr16	15294470	15296046	mm9	chr16	15294563	15296139	mm467	positive	yes
chr16	17808170	17811091	hg19	chr22	20775061	20779007	hs1620	positive	yes
chr16	18554168	18557637	mm9	chr16	18554261	18557730	mm321	positive	yes
chr16	18585742	18586133	hg19	chr22	19749356	19750055	hs515	positive	yes
chr16	18593233	18593685	hg19	chr22	19741204	19741707	hs497	negative	yes
chr16	22110016	22110705	hg19	chr3	185462672	185464469	hs2083	negative	yes
chr16	22698603	22699796	hg19	chr3	186123841	186125332	hs2382	negative	yes
chr16	23238256	23244553	hg19	chr3	186664911	186668475	hs1952	negative	yes
chr16	23502808	23507356	mm9	chr16	23502881	23507429	mm1315	negative	yes
chr16	25255379	25256208	hg19	chr3	188857183	188858023	hs887	negative	yes
chr16	25587855	25588485	hg19	chr3	189233649	189234301	hs1286	negative	yes
chr16	29719360	29721162	hg19	chr3	193489359	193491333	hs1563	negative	yes
chr16	29882436	29884131	hg19	chr3	193660817	193662478	hs1344	negative	yes
chr16	29893116	29895809	hg19	chr3	193677518	193680170	hs1453	positive	yes
chr16	30128809	30130865	hg19	chr3	193929360	193931457	hs1543	negative	yes
chr16	32568412	32570687	hg19	chr3	195846372	195848341	hs2091	negative	yes
chr16	32852084	32855869	mm9	chr16	32852170	32855955	mm1352	negative	yes
chr16	34092411	34095027	hg19	chr3	124304700	124307917	hs2031	negative	yes
chr16	35598618	35602946	hg19	chr3	122690302	122695291	hs1889	negative	yes
chr16	37812647	37815565	mm9	chr16	37812733	37815651	mm1339	negative	yes
chr16	37892144	37895218	mm9	chr16	37892230	37895304	mm1361	positive	yes
chr16	42781028	42782865	hg19	chr3	114936330	114938229	hs1648	negative	yes
chr16	43080156	43080909	hg19	chr3	114611706	114612491	hs255	negative	yes
chr16	43121973	43123557	hg19	chr3	114574745	114576011	hs254	negative	yes
chr16	43276775	43278938	hg19	chr3	114433184	114435415	hs253	negative	yes
chr16	44631515	44633626	mm9	chr16	44631628	44633739	mm1301	negative	yes
chr16	44676758	44681298	hg19	chr3	112811494	112816407	hs1685	positive	yes
chr16	62468253	62470783	hg19	chr3	94051018	94053829	hs1462	positive	yes
chr16	72685638	72688303	hg19	chr3	79042278	79045053	hs1475	positive	yes
chr16	77289984	77293024	hg19	chr21	17526224	17528103	hs1377	negative	yes
chr16	77420896	77422638	hg19	chr21	17681162	17682802	hs1304	negative	yes
chr16	77635468	77638909	hg19	chr21	17951012	17953659	hs1441	positive	yes
chr16	77651730	77654627	hg19	chr21	17968630	17971417	hs1692	negative	yes
chr16	85887134	85888622	hg19	chr21	28326327	28327753	hs1684	negative	yes
chr16	86837654	86839343	hg19	chr21	29655315	29656764	hs2400	negative	yes
chr16	89909485	89910340	hg19	chr21	32650843	32651711	hs945	negative	yes
chr16	91104484	91107069	hg19	chr21	34221456	34223948	hs1548	negative	yes
chr16	91139145	91142270	mm9	chr16	91139390	91142515	mm817	negative	yes
chr16	91290868	91293443	hg19	chr21	34465959	34469066	hs1346	negative	yes
chr16	92340534	92342015	mm9	chr16	92340779	92342260	mm769	negative	yes
chr16	92344467	92345647	mm9	chr16	92344712	92345892	mm768	negative	yes
chr16	92412092	92416120	hg19	chr21	35915964	35919662	hs2084	negative	yes
chr16	92427453	92430131	mm9	chr16	92427698	92430376	mm107	negative	yes
chr16	94956955	94958478	hg19	chr21	39227606	39229223	hs1811	negative	yes
chr16	95847911	95849564	hg19	chr21	40361359	40363126	hs1516	positive	yes
chr16	97007285	97008846	mm9	chr16	97228892	97230453	mm1194	negative	yes
chr17	4038923	4041381	mm9	chr17	4038923	4041381	mm1389	negative	yes
chr17	7268493	7269968	mm9	chr17	7472842	7474317	mm108	negative	yes
chr17	9886737	9890324	hg19	chr6	164382342	164386389	hs1955	negative	yes
chr17	10049353	10054361	hg19	chr6	164168419	164172918	hs2111	negative	yes
chr17	10472540	10473972	hg19	chr6	163630391	163631925	hs2377	negative	yes
chr17	10743927	10746180	hg19	chr6	163276830	163279930	hs1358	negative	yes
chr17	11085724	11088280	mm9	chr17	11278590	11281146	mm26	negative	yes
chr17	12203951	12205747	mm9	chr17	12396817	12398613	mm156	negative	yes
chr17	12789717	12793070	mm9	chr17	12982583	12985936	mm89	negative	yes
chr17	15440120	15441360	hg19	chr6	170747095	170748864	hs1310	negative	yes
chr17	26508852	26510691	hg19	chr5	172198673	172201009	hs1828	negative	yes
chr17	26811609	26815540	mm9	chr17	26948554	26952485	mm843	negative	yes
chr17	26827896	26829166	hg19	chr5	172632796	172633597	hs505	negative	yes
chr17	26863571	26866666	mm9	chr17	27000516	27003611	mm824	negative	yes
chr17	28343766	28346334	hg19	chr6	35457129	35460603	hs1887	negative	yes
chr17	29433661	29435358	mm9	chr17	29570606	29572303	mm81	negative	yes
chr17	29462413	29466116	mm9	chr17	29599358	29603061	mm755	positive	yes
chr17	30377456	30379782	hg19	chr6	38358690	38360084	hs1366	negative	yes
chr17	30548540	30552550	mm9	chr17	30685485	30689495	mm1326	negative	yes
chr17	35719853	35721785	mm9	chr17	35856798	35858730	mm90	negative	yes
chr17	43329588	43330220	mm9	chr17	43466537	43467169	mm252	negative	yes
chr17	44151634	44153406	hg19	chr6	46020500	46022001	hs2397	negative	yes
chr17	44296916	44302725	hg19	chr6	45847301	45850554	hs1461	positive	yes
chr17	44617720	44619644	mm9	chr17	44754669	44756593	mm924	negative	yes
chr17	44722114	44723789	mm9	chr17	44859063	44860738	mm657	negative	yes
chr17	45325361	45328754	hg19	chr6	44518184	44521377	hs1495	negative	yes
chr17	46008888	46010190	hg19	chr6	43760764	43762277	hs2399	negative	yes
chr17	47871880	47873076	hg19	chr6	41560717	41562075	hs1100	negative	yes
chr17	47914774	47915357	hg19	chr6	41523224	41523677	hs281	negative	yes
chr17	47988296	47991797	mm9	chr17	48125245	48128746	mm751	positive	yes
chr17	48008186	48009225	hg19	chr6	41436815	41438024	hs1145	negative	yes
chr17	48010566	48011721	hg19	chr6	41434455	41435695	hs1003	negative	yes
chr17	48057243	48058148	hg19	chr6	41380559	41381515	hs1225	negative	yes
chr17	49690781	49691948	mm9	chr17	49830106	49831273	mm276	negative	yes
chr17	51062470	51063411	hg19	chr3	17608555	17609487	hs750	negative	yes
chr17	51370486	51371772	hg19	chr3	17987632	17988945	hs839	negative	yes
chr17	51536358	51537318	hg19	chr3	18169362	18170237	hs250	negative	yes
chr17	52225510	52226530	hg19	chr3	18844368	18845392	hs251	negative	yes
chr17	52307830	52309076	hg19	chr3	18898614	18899860	hs651	negative	yes
chr17	52329852	52330752	hg19	chr3	18916569	18917473	hs825	negative	yes
chr17	52459484	52461092	hg19	chr3	19027747	19029355	hs936	negative	yes
chr17	52465120	52465827	hg19	chr3	19033849	19034569	hs252	negative	yes
chr17	62700976	62701852	hg19	chr5	106813861	106814679	hs1733	negative	yes
chr17	62785705	62787128	hg19	chr5	106909516	106911012	hs1734	negative	yes
chr17	63171422	63173537	hg19	chr5	107299863	107302976	hs1345	negative	yes
chr17	73022163	73024151	mm9	chr17	73371503	73373491	mm82	negative	yes
[truncated: 204 more rows]
