# Supplementary material for: Limb-Enhancer Genie: An accessible resource of accurate enhancer predictions in the developing limb
Source: PLoS Comput Biol. 2017 Aug 21;13(8):e1005720. doi: 10.1371/journal.pcbi.1005720 (PMC5578682; doi:10.1371/journal.pcbi.1005720)
Supplement: S7 Table — For each one of the VISTA elements considered, the score of the best TF-binding sites’ cluster for each of the cognate TF-gene expressed in the developing limbs (S3 and S4 Tables) is provided. (XLSX) [file pcbi.1005720.s017.xlsx]

## Sheet: S7
VISTA identifier	Alx3	Arid3a	Arid5b	Arnt	Arnt2	Atf1	Atf4	Atf7	Bach1	Batf3	Bbx	Bcl6b	Bptf	Brca1	Cdc5l	Cebpd	Cebpg	Cebpz	Clock	Creb1	Creb3	Creb3l2	Crem	Ctcf	Cux1	Cxxc1	Ddit3	Dlx2	Dlx3	Dlx5	E2f1	E2f3	E2f4	E2f5	E2f6	E2f7	E2f8	Ebf1	Elf1	Elf2	Elf3	Elk1	Elk3	Emx2	Eno1	Epas1	Erf	Ets1	Ets2
mm912	0	1.66283	2.96572	0	0.0169138	0	0	0	0	0	0.0791824	0.0190579	4.2997	0.0105136	0	0	0	0	0	2.16073	0	0	0	0	0.124642	0	0	0	0	0	5.99542	9.50725	8.85293	0.243214	12.7024	1.31123	1.26576	4.28561	0	0	0	0	0	0	0	0.11439	0	0.325792	0
hs698	0	4.02733	0	0	0	4.46218	4.82974	4.1798	0	0	0	0	8.82785	0	0	0	0	0	0	4.9914	4.24642	4.0511	0	0	0	0	0	8.4698	12.3913	8.98629	0	4.09909	4.32975	0	0	0	0	4.32334	4.38934	0	4.03763	0	4.14026	4.77469	0	0	2.93697	0	0
mm663	0	0.555367	0	0	0	0	0	0	0	0.0113363	0	0	0.0140277	0	0	0	0	0.17101	0	0.299353	0	0.865138	0.168694	0.0417024	0	0	0.925387	0	0	0	0.038215	0	0	0	0	0	0.477724	0	0.980171	0.44425	0.930358	0.298855	0.529774	0.295785	0.917178	0	0	0.595747	0.694871
mm664	0	4.27277	0	0	0	0	0	0	0.0577471	0	0	7.40871	0	4.05061	0	0	0	0	0	0	0	0	0	0	4.21028	0	2.05738	0	0	0	0.442227	1.91269	0	0	6.67155	0	0	5.97176	3.45288	0	0	0	0	1.50688	2.21075	0.162015	0	6.85352	3.63139
mm1342	0	3.3949	0	0	0	0	0	0	0	0.208255	0.173445	0	0.0640324	0	0	0	3.12342	0	0	0.106776	0.120687	0	0	0	0.0462194	0	4.17446	0.0832524	0.0832524	0.077967	0	0	0	0	4.42612	0	0	4.83284	4.26033	0	4.86086	0.182601	0.144754	3.20584	0.314765	0.353467	0.136443	0.162538	0.18883
hs942	4.34199	0	0	0	0	0	0	0	3.98399	0	0	4.70553	0	0.859508	0	4.08785	4.15617	0	0	0	0	0	0	0	4.07713	0	0.211143	0	0	0	12.8476	2.40768	4.44691	4.42597	1.8468	4.76582	8.64537	13.141	0	0	0	0	0	4.1463	0	1.61657	0	0	0
hs787	0	4.16368	0	4.2652	8.27435	0	0	0	3.9908	0	1.59513	4.10127	0	0	3.60645	0	0	4.4045	0	0	4.14327	4.25649	0.924235	12.4366	4.86995	4.12508	0	4.7048	4.7276	4.7048	8.74013	4.36734	2.92572	3.18855	4.12435	0	4.48517	5.74281	4.34008	4.14448	4.35262	5.44249	4.64975	0	0	2.76969	8.86375	8.37023	5.1317
hs865	0	0	0	0	0	0	0	0	4.27246	0	0	0	0	0	0	0	0	0	0	0	0	0	0	4.10893	4.065	0	0	0	0	0	4.44009	8.95739	0	0	4.58085	0	0	0.0812423	0	0	0	0	0	0	0	5.43012	0	0	0
hs216	4.98297	0	0	0	0.0109093	0	0	0	7.62745	0	2.53462	0	0	0	0	0	0	0	0	0	0	0	0	0	0	0	0	4.22768	4.38934	0	0.0499803	0.161465	0	0	0.14457	0	0	0	0	0	0	0	0	11.1215	0	0.42494	0	0	0
hs217	4.1891	0.198224	0	0	0.101015	0	0	0	0	0	3.97359	4.11951	0	0	0	0	0	0	0	0	0	0	0	0	0	0	0	8.09545	4.05306	4.16115	11.7411	6.1793	7.69115	0	8.43637	0.477404	0.0885001	13.0179	8.30831	4.06298	5.22915	0	0	0	0	0	0	0	4.20957
hs538	4.13966	0	0.496549	0	0	0	4.4318	0	0	0	0	0	0	0	0	0	0	0	0	0	4.06956	0	0	4.55909	0	0	1.46515	4.05306	4.05306	0	4.5986	7.28587	4.31069	0	8.455	0	4.28114	4.4168	0	0	0	0	0	0	0	0	0	0	5.18442
hs2064	1.43176	0	0	0	0	0	0	0	0	0	0.0945378	0.0247291	0.0868934	0.106235	0	0	0	0	0	0	0	0	0	0	0	0	0	0.122459	0.122459	0.114632	0	0.0279808	0	0	1.89694	0	0	2.42306	5.85257	0	0	5.79225	4.07945	1.67521	0.288271	0	0	4.04618	0
mm1357	0	0.653685	0.144249	0	0	0	0.0178801	0	0.0905518	0	0.331242	2.14765	0	0	0	1.00643	0.524558	2.87817	0	0	0	0.167575	0	0.790571	0	0	0	0	0	0	0.066637	0.103023	0.0957075	0	0	0	0	0	0.10263	0	0	0	0.155915	0	0	0.685505	0.125532	0.115246	0.127084
mm665	0	0.411534	0.0552876	0	0.0354818	1.15774	1.28338	1.02619	0.0124008	1.28418	0	0	0	0	1.17536	0	0.910407	0	0.0102796	0	1.1616	0	0.575741	0.804323	0	0	0.0556753	0.0278547	0	0	0.105435	0	0	0	0	0	0	0	0	0	0	0	0.0390726	0.0480604	0.0160556	0	0	0.0347387	0
mm1306	0.0741295	4.37696	0.0181129	0	1.36912	0.0244868	0.0238346	0	0.0213445	0	0.0199457	1.47344	3.06591	3.31969	0	0.0723469	0.131595	3.8331	0	0.0379888	0.0153303	4.07695	0.020819	0	0	0	0	3.13419	6.94207	2.55856	0.312206	0.0188389	0	0	2.14247	0.0739342	0	0.0637411	0.0369952	0	2.28126	0.0178972	0	0	0	0	0.0150331	3.97994	0.0207592
hs1933	1.79107	0.0352491	0	0	0.032594	0	0	0	0	0	0	0	0.129277	0.367326	0	0	0	0	0	0	0	0	0	0	0.0283553	0	0.113137	0	0	0	0	0	2.85339	0	0.0246512	0	0	0	0	0	0	0	0	0	0	0	0	0.282338	1.0191
mm1333	1.31195	3.49631	0.293919	0	0	0	0	0	0	0	0.0613392	4.04856	0.105226	0.0419848	0	0.0238563	0.0183801	0.0138524	0	0	3.66822	3.78202	0	7.20174	0.0631127	0	0	1.1191	1.1191	1.00039	5.30049	0.0640932	1.56755	0	0.0115847	1.42535	0	0.0106979	0.270258	0.238673	3.47517	0.239405	0.239405	0	0.128392	0.272552	0.208017	0.246637	0.191917
hs1212	4.20551	0	0	0	0	0	0	0	0	0	0	0	0	0	0	0	0	0	0	0	0	0	0	3.96128	4.12634	0	4.28233	4.08884	0	0	0	6.85143	0	0	0	0	0	4.16304	8.60067	0	0.0360949	0	4.85387	0	0	2.67745	4.53611	8.9088	4.29073
hs1125	0	2.62221	0	2.47604	0	0	0	0	4.32426	0	0	0	4.23472	4.20691	0	0	5.05849	0	0	0	0	0	0	0	0	0	0	0	0	0	0	0	0	0	0	0	0	4.06651	2.50867	0	0	0	0	0	0	0	0	6.97312	0
hs810	9.91522	4.04335	4.03891	0	0	0	0	0	0	0	0	0	0	0	0	0	0	0	0	0	0	0	0	0	0	0	0	8.87821	13.9617	0	3.72717	0	4.05214	0	8.00611	0	0	0	4.12436	0	0	0	4.54975	13.2708	0	0	0	4.30892	0
hs1581	0.070302	0.119538	0.0134676	0	0	0	0.0319116	0	0	0	0	0.0308121	3.92784	0	0	0	0.0247846	0	0	0.0259953	0	0	0	0.0170484	0.0226603	0	2.83546	0	0	0	0	0	0	0.0177428	0.0130894	0.0395367	0.0170931	0	0	0	4.09885	0	4.13763	0	0	0.0100476	0	5.41215	4.02164
hs1093	0	0	0	0	0	0	0	0	0	0	4.35853	0.0792322	0	0	0	0	0	0	0	0	0	0	0	0	0	4.18157	0	2.95716	3.24202	0	4.37469	4.51286	0	0	0	0	0	8.37999	0	0	0	0	0	4.09474	0	2.10528	0	0	0
hs1112	4.1152	5.04144	0	0	0.0222542	0	0	0	0	0	4.32482	0	1.0328	5.12587	0.547649	0	0	0	0	0	0	0	0	0	0	0	4.10925	5.1986	4.42366	4.72354	0.0522686	4.21396	0	0	0.0786077	3.95553	3.63463	0	4.76363	4.04001	4.41005	0	4.92445	0	0	0.0953896	0	4.86262	0.249402
hs1555	0	0	0.237817	0	0	0	0.0131657	0	0	0	0	0.120169	4.77989	0	0	0	0	0	0	0	0	0	0	0	0	0	0	0	0	0	0	0	0	0	0.0335228	0.111158	1.66917	0.0102406	12.3043	0.298517	4.14935	0	8.2735	0	0	0.0203917	0	8.544	7.17088
hs958	4.04197	0.370387	4.51004	0	0	0	0	0	0	0	0	0	0.323409	4.52724	0.0123139	0	5.10958	0	0	0	0	4.04152	0	0	0	0	0	0	0	0	3.82153	4.22915	0	0.0224341	5.34753	2.0818	1.35955	0	0	0	2.49122	0.0207629	0	0	0	0	0	2.60177	0
hs977	4.02043	4.14513	0	0	0	0	0	0	0	0	0	0	0	0	0	8.43587	0	0	0	0	0	4.20066	0	6.1667	0	0	0	0	4.011	0	4.42136	11.7647	4.1707	0	14.6224	3.93401	0	8.85093	9.63824	0	0	4.27737	8.44316	0	4.2137	0.0222114	0	9.98493	4.54163
hs1147	4.30103	0	0	0	0	0	0	0	3.91413	0	0.458818	0	0	0	4.01837	4.21254	0	0	3.39967	0	0	8.05447	0	8.26029	0	0	0	4.71897	4.71897	4.4168	4.70553	4.04829	4.81816	4.6073	4.34872	0	0	5.16089	0	0	0	0	0	0	0	0	0	0	4.29757
hs1526	8.47232	4.80902	4.08203	0	0	0	3.07483	0	0	0	3.31104	0	4.22621	0.170849	0	0	0	2.41196	0	4.17914	0	0	0	3.80306	1.77162	0	1.30266	3.29617	7.29751	0	4.05643	0	7.30482	0	4.21262	0	4.11743	8.41171	3.19681	0	4.14462	0	0	2.9274	0.030443	0	0	3.07857	0
hs1126	0	0	1.10271	0.0568731	0.0263043	0	0	0	0.0202357	0	4.02826	4.62709	0	0.433333	0.010226	0	0	0	0	0	0	0	0	0	0	0	4.24109	9.74494	8.88258	10.0148	0.0279866	0.126252	0	0	0	0	0	4.46344	0	0	0	0	0	0	1.70274	2.68945	0	0	3.94886
hs1529	4.18776	0	0	3.55558	0.169665	0	1.6568	0	0	0	0	0	2.48115	2.1855	0	0	3.14927	0	0	0	0	2.12712	4.44289	0	0	0	0.697674	5.10294	7.99731	0	4.12907	5.11744	4.06953	0	9.15663	0	0	5.32778	4.15803	0	0	0.0168612	0	4.09528	0	0.0205205	0	0.0303596	0.198504
hs1140	4.17783	4.09528	0	0	0	0	0	0	0	0	0	0	0	0	0	4.80543	4.91574	0	0	0	0	0	0	10.5745	0	0	0	4.14064	4.14064	3.8778	0.0597656	4.11919	4.08795	0	0.0728679	0	0	0.314531	0.965542	0	0	3.28877	0.0138648	0	3.67305	0	0	4.21382	4.13406
hs1303	4.48149	0	0	0	0	0	4.30277	0	0.308152	0	0.789804	0	0	0	0	4.57349	0	0	4.43608	0	0	4.78741	0	0	0	0	0	8.10611	8.10611	0	0	4.00895	0	0	4.33137	4.3589	0	5.76955	0	0	0	2.80927	0	3.39016	4.31752	0.552636	0	0	0
hs1554	4.45178	0.0540207	0	0	0	0	0	0	0	0	4.84949	4.21614	0	0	0	0	0	4.12673	0	0	0	0	0	0	0	0	3.98858	0	0	0	0.0302694	4.09366	4.01384	0	4.35912	6.08154	5.88955	0.276328	0.015647	0	0	4.25309	0	4.99518	0	0	0	4.20621	0.0130066
hs401	0	4.67572	0	0	0	0	0	0	0	0	0	4.02411	4.69465	0	0	0	0	0	0	0	0	0	0	0	0	4.10791	0	4.4168	4.11577	4.64743	0	0	0	0	0	0	0	4.9431	0	0	0	0	0	4.15481	0	0	0	0	0
hs1131	0	4.18046	0	0	3.215	0	4.3685	0	0	0	0	0	0.332777	0	3.30703	10.5599	4.88273	4.05005	0	0	0	0	0	0	4.86328	0	4.70408	4.22185	0	4.41117	2.27728	0	5.82233	2.63093	4.24679	4.50358	6.89615	5.55974	4.32239	0	5.10958	4.07676	0	4.27003	0	10.2533	4.28233	4.14569	0
hs1534	8.45822	8.21794	0	0	0.131513	4.74827	4.69545	4.09845	3.01065	5.29351	0.215942	0	0.788896	0.0449707	0	0	0	4.48812	0	4.31812	4.50694	0	4.15428	5.69122	0	0	0	5.13803	0	0	7.91499	9.33016	8.19771	2.84288	0.0110566	0	2.34398	7.72611	0	0	0	0	0	4.57187	0	4.14844	0	3.64302	0
hs960	4.38405	4.02595	0	0	0.0301419	0	0	0	0	0	0	6.17986	0.0173266	0.919619	0	0	0	0	0	0	0	0	0	0.166822	4.11634	0	0	4.55129	4.03292	0	4.79129	4.61394	4.39146	0	4.61661	0	0	9.18831	4.40077	0	0	0	5.2564	4.44733	0	0.115226	0	4.29366	4.0697
hs702	0	8.79684	0	0	0	0	3.48056	0	8.46463	0	0	0	4.29757	5.16304	0	0	0	0	0	0	0	0	0	0	0	0	0	0	0	0	0	0	0	0	0	0	0	0.941451	4.45469	0	0	0	4.57187	0	0	0	0	4.22904	4.07883
hs938	5.56384	4.56225	0	0	0	0	0	0	0	0	4.07417	0	0.0263195	0	0	0	0	0.489377	0	0	0	0	0	0	4.25649	0	0	0	0	0	0.38587	0	0.407103	0	0	0	0	1.52528	0	0	0	0	0	0	0	0	0	0	0
hs584	3.77614	0	0	0	0	4.6073	4.42481	0	8.61892	4.04729	0	0	4.9942	4.42597	0	0	0	0	0	0	8.39841	0	5.27737	0	4.17393	0	4.23223	0	0	0	12.8265	2.49324	0	0	4.08831	0.0106327	3.53926	3.25491	4.00349	0	1.40553	2.32322	4.06973	0	0.0578373	0	0	4.15739	0
hs1177	0	0	0.0233902	0	0	0	0	0	0	0	0	0.0167448	0	0.0533565	0	0	0	0	0	0	0	0	0	0.0118758	4.383	0	0	0	0	0	0	0	0	0	0	0	0	8.87683	0	0	0	0	0	0	0	0	0	0	0
hs969	4.29414	0	2.25059	0	4.38196	0	0	0	4.55565	0	0	0	0	0	0	0	0.819534	0.0792837	0	4.27964	5.23036	8.34276	0	0	0	0.151396	0	4.46547	4.94113	0.416262	0	0	0	0	0	0	0.0364046	7.54987	5.16408	0	0	0	0	3.70782	0	0	0	4.35796	4.03062
hs1121	0	0.048099	0.0127491	0	0.0125191	0	0	0	0	0	0	4.16152	0	0	0	0	0	4.92177	0	0	0	0	0	0	0.279762	0	0	4.767	4.16813	4.13549	0	0	0	0	0	0	0	0	0	0	0	0	0	0	0.440806	0	0	0	0
hs1553	0	0	0	4.1336	2.34816	0	0.0215623	0	1.32919	0	4.42039	0	0.0111112	0	0.029875	0.0256973	0.0277398	4.31801	0	0	0.0536894	1.68544	0	6.06942	8.57144	0	0	0	0	0	0.860822	4.22072	1.98194	0	3.99176	0	0	4.07212	4.91593	0	4.31785	4.4678	7.75391	0	0	0	0	4.65349	0.170964
hs990	0	9.44058	0	0	0	0	0	0	8.19529	0	0	0	0	0	4.33536	4.057	4.41341	0	0	0	0	4.31249	0	8.89342	9.12875	0	0	4.10911	0	0	0	4.04174	0	0	3.39505	4.15334	0	5.91608	0.260944	0	0	0	0	0	0	0	0	0	0
hs868	0	4.03432	0	4.11862	0	0	4.10846	0	5.4279	0	4.97469	0	1.12769	8.87949	4.76792	0	0	0	0	0	0	0	0	8.93306	0	0	4.45492	0	0	0	8.27434	0	0	0	4.00281	0	3.50357	0	4.97062	0	7.86648	0	0	4.40121	0	0	0	4.58838	0
mm1	0	0	0	0	0	0	0	0	0	0	0	0	0	0	0	0	0	0	0	0	0	0	0	0	0	4.26573	0.818135	0	0	0	0	0	0	0	0	0	0	0	0	0	3.25139	0	0	0	0.0122092	4.33955	0	0	0
mm711	2.15374	0.403976	0.0213948	0	3.67415	0	1.42631	0	2.2434	0.0780894	0.856014	0	2.32224	2.7643	0.178927	1.86555	0	0	0	0	0.391983	0.392053	0	0	3.102	0	0.39984	4.60293	4.31135	4.60293	2.17928	0.486093	0	2.16528	3.59766	0	0	0	0.279162	0	0.10449	0	0.179271	0.937327	2.69024	0.623729	0	0.303185	3.08316
hs1253	0	0	0	0	0	5.04585	4.19116	4.33516	0	6.35412	4.28819	0.0277675	0	0	0	0	0.0384017	0.148707	0	0.0291285	5.22997	0	5.06607	0.532789	4.11748	0	0	4.74232	4.44129	4.74232	0.179989	0.166203	0.1421	0	0.0963282	0.088245	0	0	3.94973	4.01571	4.07604	4.02987	0	0	4.20204	0.478063	0	4.46918	0.0488081
mm613	0	0	2.93404	0	4.57187	0	0	0	0	0	0	0	0	0	8.36157	0	4.48945	0	0	0	0	0	0	0	0	0	1.25045	4.72354	4.42366	4.72354	4.35827	4.90527	4.55622	0	4.78607	0	0	3.42215	0	0	0	0	0	0	0	3.04644	0	0	0
hs950	0	0.154782	0	0	0	0	0	0	0	0	0	0	0	0.0225868	0	0	0	4.19111	0	0	0	0	0	0	4.07779	0	0	0	0	0	0	0	0	0	0	0	4.35556	0.0350556	0.0214183	0	0.0250396	0.0200386	0.0194916	0	0	0	0.0300903	0.0185531	0.0179686
mm88	0	2.13931	0	0	0	0.0637728	0.0470644	0.05125	0	0.0513087	0	0.420313	0.630988	0	0	0	0	0.242715	0	0	0.0580278	0	0	2.47102	0	0	0	0	0.0248149	0	0	0.173971	0	0	0	0	0	0	2.28207	0	0	0	0	0	0	0	0	2.09443	0
mm489	0	4.86967	0	0	0	0	0	0	5.79964	0	0	0	0	0	0	0	0	0	0	0	4.16338	0.211874	4.01728	0.797795	3.5137	0	0	3.51744	3.73087	3.89217	0.970228	3.3096	0	0	1.54902	0	0.349826	0	0.0697918	0	0	0	4.11021	8.61112	0	0	0	0.0620697	0
hs1541	0	0	0	0	0	0	3.52025	0	0	0	0	0	0	2.20337	0.032056	0.0222477	3.84132	0	0	0	0	0	0	1.90942	4.55326	0	0	0	0	0	0.188926	0	0.151465	0	0	0	0	8.94578	4.12481	0	0	0	0	0	0	0	0	9.22762	0
hs1578	10.0052	4.4828	0	0	4.62782	0	0.103954	0	0.0206784	0	0	0	0	0	0	0	0	0	0	4.03198	0	4.27862	0	3.97103	6.98862	0	0	8.56807	8.63899	4.92812	0	0	4.74473	0	2.31953	0	0	8.65623	4.59658	0	4.21183	0.0223116	0	4.97469	0	2.22566	0	0	0
mm1358	0	0	0.0176718	0	0	0	0.955269	0	0	0	0	0	0	0	0	0.795679	0.642784	0	0	0.0656049	0	0	0	0	0	0	0.560747	0	0	0	0	0	0	0	0.262079	0	0.0143593	0	0	0	0	0	0	0	0	0	0	0	0
hs1207	0	0	0	0	0	0	0	0	4.28902	0	0	0	0	0	0	0	0	0	2.20326	0	0	0	0	0	0	0	0	0	0	0	4.08938	0	0	0	0	0	0	0.0375825	0.0125287	0	0.0124983	0	0	4.4907	1.88798	0	0	4.70273	1.10632
hs1764	0	0	0	0	0	0	0	0	0	0	0	0	2.20767	1.4823	4.43967	0	0	0	0	0	0	0	0	0.0917711	4.11103	0	0	0	0	0	2.59761	2.22495	0.173542	0	2.18032	0	1.8535	3.14977	5.5697	3.76123	0	4.61936	5.06322	0	0	0.0314753	3.65212	5.05003	0
mm1372	0.0525264	1.30374	0.117521	0.28653	0	0	0	0	0.579334	0	0.232656	1.65556	0.0322246	0	0	0	0	0	0	0	0	0	0	2.30854	0	0	0.0137081	0	0	0	0.0134956	0.0571528	0	0	0.328296	0	0	0.0431372	0.318853	0	2.40177	0	0	0	0	0.046545	0	0.166459	0
hs504	0	0	0	0	0	0	4.10943	4.20478	4.6547	0	0	0	0	0	0	0	0	0	0	4.11764	0	0	0	0	0	0	0	0	0	0	0	0	0	0	0	0	0	2.17734	5.61186	0	2.01058	0	0	0	0	0	0	1.86327	0
mm1355	3.17892	0.0742497	0	0	0	0	0	0	0	0.0265811	0	1.32994	0	0	0	0	0	0	0.0422204	0.164767	2.13822	3.86849	0.128489	0.013757	0	0	0	0	0	0	0.919199	1.16509	0.907494	0	1.09156	0	0	3.907	1.30533	0	3.38768	0	4.34031	0	0.0768627	0.0263601	0	3.707	0.176966
hs1507	5.49566	0.633089	0	0	0.0339786	0	0	0	0.0320545	0	0	0	4.69219	0	0	0	0	0	0	0.238365	0	0	0	0.152364	0	0	3.90414	4.33039	3.97563	4.09026	0	0	0.0154703	0	0.0353381	4.46223	4.13193	0	0.466938	0	0.449446	0	0	5.63369	0.112387	0	0	1.68916	0
hs1635	0	0.015315	5.15388	0	0	2.85476	4.05346	2.66038	0	2.63466	0	1.52546	0	0	4.47625	0	0	4.74473	0	0	3.00804	0.997899	2.3088	1.48271	0	0	0	5.19517	2.1399	0	4.16749	0	4.71897	0	0	0	4.07935	0.998317	0	0	0	0	4.01189	0	0	0	0	0	0
hs493	10.865	4.25303	0	0	0.0248285	0	0	0	0	0	0	0	2.46125	0	0	0	0	4.67162	0	0	0	0	0	0	4.12483	0	0	0	0	0	0	0	0	0	0	0	0	1.88608	4.50481	0	4.28435	0	0	4.24638	0	0	0	4.95437	0
hs1730	0	0	0	0	0.0287005	0	0.350669	0	0	0	0.0118017	0	0	0.293327	0	0	0	0	0	0	0	0	0	0	0.207723	0.0229606	0	0	0	0	0	0.033319	0.0116117	0	0	0	0	0	0	0	0	0	0	0	0	0	0	0	0
hs2034	0	0.283953	0	0	0.263829	0	0.0312855	0	0	0.0357535	0	1.29772	0.0467607	0	1.17996	0	0	0	0	0	0.282478	0.285261	0	0.0231286	0.20228	0	0.175481	0	0	0	0	0	0	0	3.17522	0	2.76984	0.105072	0.465943	0	0	0	0	0.0246335	0	0	0	0.0284583	0.0833289
hs1376	0	0.0985501	4.4716	0	0	0	4.40473	4.42325	0	0	0	0	0	0	0	0	0	0	0	4.39093	4.05322	0	4.69034	0	0	0	0	0	0	0	0.051364	0	0	0	0	0	4.07263	0.0732039	0	0	0	0	0	0	0	0	0	1.88581	0
mm666	1.30724	1.77666	0.704914	0	0	0	0	0	0.0170833	0	0	0	0.407455	0	0	0	0.261862	0	0	0	0	0	0	0	0	0	0	0	0	0	0	0.347362	0	0	0.014189	0	0	0	0.352711	0	0	0	0.0468926	0	0	0.0265978	0	0.424208	0
hs1886	4.09736	5.09524	0.0261196	0	0.0604805	0	0.174899	0	0.0523859	0	4.91635	0	0.266844	0.0318412	0.748286	0	0.0131118	0.0102121	0	0.260488	0	0	0	0	0	0	0.303707	3.68421	4.2552	3.9986	2.91393	3.29312	0.186983	0	0.615973	0.848968	0	1.47462	0.0341829	4.3515	4.32246	0.0574288	0.0173395	0	0.0620442	0	0.0192045	0.0742918	0.345726
hs521	4.03791	0	0	0	0	0	0	0	0	0	0	0	0.135884	0	0	0	0	0	4.95468	0	0	0	0	0	0	0	0	4.59007	4.14388	4.00524	4.03813	4.50816	4.02129	0	0.0126727	0	0	4.11634	0	0	0	0.892664	0	0	0	0	0	4.19685	0.886297
hs921	9.23161	12.5604	0	0	3.60652	0	0	0	0	0	8.90352	0	0	0	0	0	4.39041	0	0	3.51794	0	0	3.68333	7.6464	12.2706	0	0	13.1101	17.6035	9.15985	7.4573	0	4.07898	2.64166	4.30764	0	0.0160359	4.19044	4.1752	4.70707	4.00568	4.17587	0	9.93742	3.14606	0	4.25571	0	0
hs249	0	4.11407	0	0	0	0	4.49894	0	0	0	0	0	0	0	9.24747	0	0	0	0	0	0	0	0	0	0	0	0	3.60013	3.8734	0	0	0	0	0	0	0	0	0	4.59688	0	0	0	0	4.00322	0	0	0	0	0
hs1243	4.04576	0	0	0	0.936025	0	0	0	0	0	0	0.0162318	0	0	0	4.54821	5.33536	0	0	0	0	0	0	0.906822	0	0	0	4.42311	0	0	0	0	0	0	4.19279	0	3.83932	0	4.13371	0	0	0	0	0	0	0	0	0	0
mm275	0	0	0	0	0	0	0	0	0.0342864	0	0	0.7645	0	0	0	0	0	0	0	0	0	0	0	0.0297203	0	0	0	0	0	0	0	0	0	0	0	0	0	0.286802	0.0190329	0	0	0	0	0	0	0	0	0.017881	0
mm315	0	0	0	0	0	0	0	0	0	0	0	0	0	0	0	0	0	0	0	0	0	0	0	0	0	0	0	0	0	0	0	0	0	0	0	0	0	0.0224234	0	0	0	0	0	0	0	3.59577	0	0	0
hs1951	0	0.131275	0	0	2.87773	0	0	0	0.184488	0	0.056653	0	0.0115632	0.0740098	0	0	0	0	0	0	0	0	0	0	0.103416	0	0	0	0	0	0	0.184374	0	0	0	0	0	0	0	0	0	0	0.0269965	0	0	0.0675341	0	0.0196007	0.0506259
hs1945	0.222484	0.0710182	0.110437	0	0	0	0	0	0.486355	0	0	0.0238432	0.067688	0.0660538	0	0	0	0	0	0	0	0	0	0	0.0496542	0	0.0156991	0	0	0	0	0	0.0109005	0	0.0199894	0	0	0.133818	0.127223	0	0	0.110937	0	0.23665	0	0.0149891	0.103088	0.149998	0.101129
hs1968	0	0.193414	1.74553	0	0	0	0	0	0	0.0432451	0	0.222494	0.2648	0.199568	0	0	0.631455	0	0.0980504	0.970342	0	0	0	0	0	0	0.568458	0	0	0	0	0.0283692	0.0111152	0	0.0361739	0	0	0.0708431	0.858015	0	0.778251	0.0147103	0	0	0.958641	0.0107152	0	0.799788	0
mm901	0	4.24186	0.692886	0	0	0	0	0	0	0	0	1.05472	0.0814379	0.0579365	0	0	0	0	0	0.334123	0	4.51102	1.05762	0.277601	0	0	4.27072	0	0	0	0	0.0555757	0	0	0	0	0	2.12386	4.05849	0	0.151003	0	0.46964	0.0597918	2.03487	0	0.701166	1.53438	0.684763
hs1750	0	0.0377688	0	0	0.0126042	0	0	0	0.0649302	0	0	0	0	1.2935	0	0	0	0	0	0	0	0	0	0	0.0227969	0	0	0	0	0	0.0144203	0.0111493	0.0126764	0	0	0	0	0.0121315	0.0343465	0.0341467	0	0.0221633	0.0315531	0	0	0.0139995	0.0316253	0.0339888	0
hs1937	0.056634	0.154238	0.0231097	0	0	0	0.165741	0	0.0238465	0.104124	0.279807	0.0562502	0.927809	0.0999595	0.0549501	0.12	0.0371062	0	0	0.0199383	0	0.0155941	0.0190475	0.0209217	0.0940082	0	0	0	0	0	0.0160376	0.141077	0.0150232	0	0.0151681	1.6735	0	0	0.0787146	0	0.0213475	0.0407769	0	0	2.13517	0.136262	0	0.0833158	0.212311
mm1317	0.332861	4.76026	0.504775	0.351627	0	1.98959	1.84835	0	0.951168	1.84801	1.12823	6.73896	0	1.244	0	0	0	0	0.0145656	0	1.81677	0	0	0.137824	0	0	4.71001	4.54227	4.2539	4.54227	3.09281	3.33238	0	0	9.56646	0.0918443	0	4.81553	5.4686	4.21075	5.59888	4.05416	4.28969	0.315056	0.0119693	2.98075	0	6.47189	0.120435
hs1649	0	0.378908	0	0	0	0	0.347034	0	4.19883	0	0	0	0	4.25667	0	0	0	0	4.16263	4.05278	0	0.266179	0.0109344	0	4.54978	0	0	0	0	0	3.252	0	0	0	3.37654	0	0	0	1.54379	1.80457	3.57985	0.0343093	2.14536	0	4.43408	0	0	0	7.92846
hs947	0	0	0	0	0	0	0	0	0	0	0	0	0	0	0	0.0804126	0.077949	0	0	0	4.20816	0	0	7.71021	0	0	0	0	0	0	4.34534	3.47265	4.97561	0	5.23768	0	5.12435	5.68374	4.98122	4.06127	5.07737	0.779124	0	0	0	0	0	6.34492	0
hs522	5.17603	4.28632	0	0	0	0	0	0	0	0	4.09355	0	0	0	0	0	0	0	0	0	0	0	0	0	3.94824	0	0	0	4.30633	0	0.777661	0.121561	0.5006	0	0.508124	0	0	0.0138432	0.0164884	0	0	0.023355	0	5.45515	0	0	0.0219275	0.0263929	0.685278
hs1790	7.96402	12.4407	0.0843405	0	0	3.93355	4.03019	0	0	0	0.697466	0	0	0	13.7465	0	0	0	0	0	0	0	5.50717	0	3.06333	0	0	0	3.04886	0	0.0941643	3.76074	0.0896742	0	0.0788895	0	0	0	0	0	3.99603	0	0	0	0.0198773	0	0	8.99397	0
hs1728	10.343	0	0	0	0	0	0	0	0	0	0	0.136092	0	0.748824	0	0	0	0	0	0	0	0	0	0.206207	0	0	0	0	0	0	0	0	0	0	0	0	0	0	0	0	0	0	0.0139455	6.75812	0.0604072	0.194844	0	0.843509	0
mm1363	0.283805	3.14019	0.141603	0	0	0	0	0.0911911	1.71554	0.101054	0	3.30392	0.121387	0.168108	2.4503	0	0	3.01804	0	0	0.104582	0.105083	0	0.319962	3.33275	0	0.485116	0	0	0	0.402648	0.697135	0.315989	0	0.429211	0	0.31666	4.43627	0	0	0	0	0	0	0.691392	1.93779	0	0.0455561	0.114909
hs1729	0	0	0	0	0	0	0	0	0	0	0	0.0169462	0.0301815	0.286678	0	0	0	0	0	0	0	0	0	0	0	0	0.0441044	0	0	0	0	0	0	0	0.418937	0	0.0129446	0.0134405	0	0	0	0	0	0.0468851	0.457183	0	0	0	0
hs1368	0	0.0118935	0	0	0	0	0	0	0	0	0	3.07942	0.09048	0	0	0	0	3.77024	0	0	0	0	0	4.29798	0	0	0	0	0	0	0	0	0	0	0	0	0	0.101602	0	0	0	0	0	4.31087	0	0.108272	0	0	0
mm112	0.052011	0.0561443	0	0	0	0	0	0	0	0	0	1.36683	0.828622	4.18349	0	0	5.83331	0	0	0	0	0	0	0	0	0	4.69128	0	0	0	0.103493	0	0	0	0	0	0	0	0.0834046	0	0.082211	0.0859066	0.0574865	0	0.934219	0.558055	0	0.187417	4.14388
hs2404	0	0.447213	0.734293	0	1.35022	2.63092	0	2.85533	0.132876	3.13116	0	0	1.23678	0	0	0.44267	0.418941	0	0	0.0108129	3.032	0	0	0	0	0	0.311668	0	0	0	0	0	0	0	0	0	0	0	0	0	0	0	0	0	4.24454	0	0	4.77621	0
hs1443	3.59156	0	0	0	0	0	0	0	4.03858	0	0	0.0487153	0	0	0	0	0	0	0	0	0	0.342031	0	0	0	0	5.01139	3.77104	3.77104	3.52958	0.966623	2.59017	0.0177803	0	4.24059	0.0136017	0.0109603	4.24069	4.23535	0	0	0.113683	1.89629	0	4.05212	0	0	0.0541943	4.16606
hs1322	0	0	4.4045	0	4.25925	0	0	0	0	0	0	0	0	4.22915	0	0	0	0	0	4.04386	0	0	0	8.71898	0	0	4.8645	4.2003	4.15519	4.27595	4.73993	4.07699	0	0	0	0	0	8.65166	0.114608	0	0	0	4.15635	0	4.00345	4.26902	4.14203	4.64973	4.49759
hs1780	6.79672	0	0	0	0	0	0	0	0	0	0	0	0	0	0	0	0	0	0	0	0	0	0	0	0	0	0	0	0	0	0	0	0	0	0	0	0	0	0	0	0	0	0	4.8119	0	0	0	0	0
mm153	0.489188	1.29899	0	0	0	0	0	0	0.103465	0	0	0	0	0	0.948095	0	0	0	0	0	0	0	0	0	0	0	0	0	0	0	0	0	0	0	0.110181	0	0	0.0280778	0.141111	0	0.134148	0.157875	0.121265	0	0	0.0220819	0.137049	0.148728	0.172377
hs1862	0	0	0	0	0.0176976	0	0	0	0	0	0.865212	0	1.04852	0.0628163	0	0	0	0	0	0	0	0	0	2.21142	0.0458061	0	0.0521571	0.0577833	0.0557835	0	0.548385	1.48694	0.366753	0	0.437478	0	0	0.354527	0	0	0	0	0	0	0.0710906	0	0	1.90904	0
mm1369	0.0381981	0.0108418	0	0	0	0	0	0	0	3.45675	4.45521	0	0	0	0.739605	0	0	0	0	0	0	0	0	6.88494	0	0	0	0.0202025	0	0	0	0	0	0	0.0483028	0	0	2.50924	0	0	0	0	4.31336	0.0198447	0.856251	2.28866	0	0	0
mm712	0.664608	0	0	0	0.61157	0	4.15515	0	3.06594	0	0	0.0156415	2.25384	4.71582	0	0.0329209	0	0	0	0	0	0	0	0.0127841	0	0	0	0.0424685	0	0	0	0	0	0	2.06466	0	0	0.0728536	3.95329	0	0.227106	0	1.15423	4.10898	0.721137	0.511877	3.93036	3.41477	0.228956
mm713	0.0141185	0	0	0	0	4.28932	4.31055	0	1.98818	4.09338	0.0129526	0.274094	0.862785	4.72416	0.312255	0	0	3.08302	0	0	0	0	4.64248	0	0	0	0.0526909	1.51233	2.43026	1.51233	0.608845	0.302644	0.623169	0	0.302454	0	0	2.73887	2.7867	0	2.71208	0	0	0.0111319	0	0	0	2.22057	3.19665
hs1442	0	0	0	0	0	0	0	0	0	0	0	0	2.69634	0	0	4.02595	4.26922	0	0	0	0.0244447	0	0	1.68881	0.194273	0	4.47089	0	0	0.0145521	2.64462	1.50956	0	0	0	0	1.97439	1.64515	9.09521	0	13.4857	9.20735	8.50987	0.0162553	0	0	4.46852	9.71068	5.23582
hs1331	0	0	4.16301	4.11111	2.42682	0	0	0	0	4.15742	0	2.41496	0	4.5309	0	2.58185	0	0	0	0	4.1825	0	0	0	0	0	4.94348	0	0	0	1.79934	0.991396	1.64842	0	2.02432	0	0	8.16567	4.01021	0	4.43161	0	0	0	0	4.30415	0	4.42946	2.70963
hs1191	0	0	0	4.1967	0.0182972	0	0	0	4.31279	0	0	0	0	0	0	0	0	1.54982	0	4.1938	0	4.65725	3.61683	0	0	4.5505	0	6.28454	4.44009	9.08292	0	4.02619	0	0	0.234624	0	0	4.29325	3.23168	0	0	2.96388	0	0	0	0	0	3.40758	2.9543
hs1136	4.21383	0	0	0	0	0	3.37902	0	0	0	0	0	5.40252	0	0	0	0	0	0	0	0	0	0	0	0	0	0	5.53874	5.29852	4.11873	0.674249	0	0	0	0.183094	0	0	0.107964	0	0	0	0	0	9.27727	0	0	0	1.58854	0
hs970	0	0	0	0	0	0	0	0	0	0	0.0124423	0	4.67162	0	0	0	0	0	0	0	0	0	0	0.852431	4.33819	0	2.02108	0	0	0	0	1.58833	0	0	0.0240697	0	0	3.08176	0.0192073	0	0	0	0	0	0	0	0	0	4.05481
hs1144	0	0	0	0	0	0	0	0	0	0	0	0	0	0	0	4.31213	8.25399	0	0	0	0	0	0	0	0	0	0	0	0	0	5.03339	4.1798	4.6968	0	4.93181	4.47496	0	4.11805	0	0	0.0606041	0	4.3508	0	1.90179	1.74384	0	0	0.0740948
hs203	4.13608	10.5891	4.46852	0	1.54508	0	0	0	0	0	0	0	0.296815	4.62709	0	0	0	0	0	0	0	0	0	0	0	0	1.99029	4.22185	9.53362	8.45213	8.06887	0.0904344	4.52568	0	7.73791	0	13.2988	3.28473	0.147028	0.015856	0.173213	0	0	0	0	0.0527994	0	0.0183409	2.50407
hs1235	4.68673	9.60259	0	0	0	0	0	0	0	0	8.1119	0	0	0	0	0	0	0	0	0	0	0	0	0	0	0	4.30245	0	0	0	0	3.44496	0	0	0	0	0	0	0	0	5.31155	0	0	0	0	1.7881	0	0	0
hs1202	0	8.1476	0	0	0	0	4.46152	0	4.74315	0	0	0	0	0	0	0	4.17153	4.17259	0	0	0	0	0	0	0	0	0	0	0	0	1.98288	2.53522	1.95503	0	2.13211	0	0	4.27819	3.53899	0	0	3.30694	3.3756	4.86328	0	4.53759	0	3.92266	0
hs1230	0	0	0	0	0	0	0	0	3.18546	0	0	3.1841	4.29542	0	0	0	0	0	4.12131	0	0	0	0	4.47484	0	0	0	0	0	0	0	2.46879	0	0	4.0752	0	0	4.16112	0	0	0	0	0	0	0.163989	0	0	0.0250479	0
hs202	0	4.45223	0	0	0	0	4.68613	0	0	0	0	0	0	0	0	0	0	0	0	0	0	0	0	8.47236	0.500637	0	0	4.05306	4.05306	0	4.0942	0	0	0	0	0	0	0	0	0	0	0	0	0	0.0975002	0.116775	0	0	0
hs201	0	0	0	0	0.0645132	2.25278	0	2.46696	0	0	0	0	0	0	0	0	0	0	0	0	2.7337	0	0	0	4.83565	0	0	0	0	4.13497	0.19517	0.0759239	0.170035	0	0.187977	0	0	0	0	0	0	0	0	0	0	0	0	0	0
hs1185	0	8.3367	0	4.31359	0	0	6.28467	0	3.9368	0	0	4.47382	0	0	0	0	0	0	0	4.39147	0	4.21219	4.00087	0	2.11691	0	4.38214	0	0	0	0	0	0	0	0	4.00852	0	0	0	4.02204	0	4.18614	4.08451	0	0	3.29584	4.17094	4.20924	4.16421
hs762	0	8.84634	4.30803	0	0	0	0	0	0	0	0	0	0	0	4.15927	0	0	0	0	0	0	0	0	4.45241	0	0.0508128	4.19973	0	0	0	0	9.05465	0	0	4.19618	0	0	4.60813	0	0	0.054545	0	0	0	0	0	0	0	0
hs1156	4.03574	9.65971	0	0	0	0	0	0	0	0	0	0	0.343074	0	0	0	0	0	0	0	0	0.0116973	0	10.08	3.36256	0	0	4.71897	8.4278	4.80933	0	0	0	0	0	0	0	0.0112265	0	0	0	0	0	0	0	0	0	0	0
hs545	4.16749	4.51879	0	0	0	0	0	0	0	0.789422	0.0948748	0	0	0	0	0	0	0	0	0	0	4.20691	0	0	4.07336	0	0	4.24109	5.50724	0	3.48799	0	0	0	6.24441	0	0	0	4.58486	0	4.16749	0	0	4.22988	4.00621	6.81256	0	4.51045	2.02757
hs214	4.10018	0	0	0	0	0	0	0	0	0	0	0	8.23178	0	0	4.13318	1.35585	1.7919	4.19791	0	0	0	0	0	0	0	0	4.70716	4.40616	4.70716	0	4.35164	0	0	0	0	4.97757	4.22113	0	0	3.99168	0	0	4.05601	4.19044	0	0	0	0
hs476	0	0	0	4.02961	0	0	0	0	4.32906	0	0	0	0	0	0	0	0	0	0	0	0	0	0	0	0	0	0	0	0	0	3.87622	0	0	0	3.96807	0	0	6.71779	8.31242	3.88472	4.29903	12.156	4.90658	0	6.22964	4.00215	0	16.6997	0
hs2070	0	0	0	0	0.0644532	0	0	0	0.101831	0	0	0.0116212	0.0707386	0	0	0	0	0.0493734	0	0.148304	0	0.457463	0	0	0	0.0703038	0	1.78992	0	0	0	0	0	0	0	0	0	0.0264269	0	0	0	0	0	0	0.0168552	0	0	0	0
hs2132	0.967257	0.0589592	0	0	0	0	0	0	0.0106628	0	1.51578	0.0221064	2.01291	0.777426	0	0	0.988754	0.128588	2.09532	0	0.0114613	2.5264	0.261258	0	1.21796	0	0	0.958802	0.0446978	0.351791	0	0.227636	0.129226	0	1.46519	0	0	0.197823	0	0	0.959799	0	0	0	0	0	0	0	0.0670273
hs2131	0.0118759	0.204267	0.635042	0	0.143831	0	0.0183732	0	0	0	0	1.83405	0	0	0	0	0.0982783	0	0	0.0159618	0	0	0	4.48687	0.0230727	0	0.526708	0.224404	0	0	0	0	0	0	2.16748	0	0	1.01823	5.38465	0	2.3901	0	0.0433262	0.0580778	0.117046	0	0	5.14004	0.052378
mm24	0	1.47066	0.0398483	0	0	0	0	0	0	0	0.206202	0.412949	0.762576	0	0	0	0.57507	0	0	0	0	0	0.0106081	0.0620221	1.56596	0	0	0	0.0478788	0	0.482199	0.0265221	0	0	0.297175	0	0.0109294	0	1.58181	0	0	0	0	0	0	0.0664604	0	1.29012	1.67291
hs2374	4.74958	0	2.65321	0	0	0	0	0	5.08193	0	0	0	1.61331	0	0	0	0	0	0.603872	0	0.0463656	0	0	0.0352527	0	0	0	5.28567	5.24565	8.9598	0	0	0	0	0	0	0	0	0.029028	0.0251967	0.0268445	0	0.0213589	4.13847	0	0	0	2.73474	0
hs1663	0	0	0	0	0	0	0	0	0	0	0	0	0	3.77957	0	0	0	0	0	0	0	0	0	0	0	0	0	4.70997	4.40894	4.70997	0	0	0	0	0	0	0	0.0470997	0	0	0	0	0.0218475	0	0	1.90193	0	0.0106639	0
hs1255	0	0	0	0	0	0	0	0	0	0	0	0	0.336576	0	0	0	0	4.23284	0	0	0	4.11691	0	0	2.47265	0	0	4.40894	5.3851	0	4.35164	0	4.28483	0	2.96799	5.64782	4.75945	4.94888	4.39361	0	2.5105	2.63419	0	4.057	0	0	0.0168018	2.95314	0
hs1257	0	0.565059	0	0	0	0	0	0	0	0	0	0	4.68403	0	0	0	0	0	0	0	0	4.00524	0	0	0	0	0	0	0	4.13549	12.9641	0	8.3085	4.34017	0	0	0	0	0	0	0	0	4.29858	0	0	0	0	0	0
hs734	0	0	0	0	0	0	0	0	0	0	0	0	4.32252	0.389733	0	0	0	0	0	0	0	0	0	0	0	0	4.2124	0	0	0	6.62525	4.84771	7.10292	0	7.1512	5.35952	6.14388	0	0	0	4.15614	4.58838	0	0	0	0	0	0	9.86166
hs175	0	0.0751057	0	0	0	0	0	0	0	4.09528	0	0	1.81761	0	0	0	0	0	0	0	0	0	0	1.20246	1.3586	0	0	0	0	0	0.422541	0	0.356665	0	0.425086	0	0	3.41958	2.5587	0.042483	2.3939	0.0641876	7.076	0	0	0	0.0491987	0.0429791	0.129739
hs366	0	0	0	0	0.0381066	0	0	0	0	0	0	0	0	9.99812	0	0	4.79048	0.502975	0	0	0	0	0	4.56864	13.1413	0	0	4.70245	4.40176	4.70245	10.1021	2.45059	4.46949	0	4.21809	0	0	4.53594	4.19899	0	0	0	4.46725	4.32422	0.0472978	0	2.92834	4.08566	2.96666
hs2357	0	0.128255	0.395208	0	0	0	0	0	0	0	0	0	0.0337787	0	4.06695	0	0	1.38002	0	0.783186	0	2.70045	0	0	0	0	0.660239	0	0	0	0	0	0	0	0.0135217	4.36452	0	0	0.350233	0	0	0	0	0	0.0179331	0.107311	0	2.23016	0
hs204	8.58784	12.3303	0	4.07109	0	0	0	0	0	0	4.46852	0	0.202745	0.0105169	0	4.22915	0	0	0	0	4.32328	4.43007	0	0.100164	0	0	0	8.55365	7.19012	8.48066	0	0	0.0115387	0	0.852514	0	0	0.0418103	0	0	4.32331	0	0	4.21896	0.0200841	0	0	0.945463	0
hs1324	4.37647	9.81395	0	0	0.845551	0	0	0	0	0	0	0	2.58508	0.244086	0	0.110234	0.939188	0	0	0	4.07779	0	0	0	4.21968	0	4.32698	4.22185	4.11014	4.47692	8.48011	1.18586	4.73049	0	1.22093	4.32606	4.18509	2.19785	6.35923	0	1.49222	0	0	9.24642	0	3.62075	4.08684	4.25727	4.16819
hs2089	0	0	0	0	0	0	0.0124953	0	0	0	0	0.369021	0	0	0	0	0.0289734	0	0	0	0.813956	4.97202	0	3.99165	0	0	0.0739471	0	0	0	0.024095	0	0.0257132	0	0	2.47346	2.88583	0	2.59982	0	2.53195	0	0.617214	0	0	0	0	0.482266	0.0241332
mm617	0.120142	0	0	0	0	3.07602	4.05155	2.94356	0	0	0	0	0	0	0	0	0	0	0	0	3.18519	0	0	3.2357	0	0	0	0	0	0	0	0	0	0	0	0	0	0	1.50051	1.75356	0	1.71413	2.01435	0	0	2.09195	1.98066	2.95945	3.66933
mm430	0	0	0	0.196728	0.567802	0.286994	0	0	0	0	0	0	1.85344	0	0	0	0	0	0	0.297026	0.50158	0.465558	0	0	0	0	0	0	0	0	0	0	0	0	0	3.9557	4.44806	0.413087	0	0	0	3.52441	3.58034	0	0.0365503	0	3.83845	5.08666	3.6926
mm646	13.3817	8.57827	4.85699	0	1.02689	0	4.02399	0	2.0839	0	0	0	0	0	5.60405	0	0	0	0	0	0	0	4.17783	3.65219	0	0	4.00629	8.10535	8.51533	4.2306	2.48979	5.27139	0	0	2.93336	0.045579	0.0405899	0.346887	5.3851	0	4.19246	0	0	4.07072	0	4.1335	4.35853	10.6532	4.37779
mm618	0	0.412674	0	0	0	0	0	0	0.114168	0	0	0	0	0	0	0.716455	0	0	0	0	0	0	0	0	0.0345798	0	0	0	0	0	0	0	0	0	0.653937	0	0	0.0715564	0.0307522	0	0.0184375	0	0	0.527071	0.0137103	0	0	0	0
hs1617	4.3756	5.55865	0	0	0	0	0	0	3.72319	0.0163527	0	8.25231	0	3.9303	4.11617	0	0	1.11556	0	0	0	0	0	8.40055	0	0	0	0	0	0	1.39209	7.29746	0.0641831	0	2.575	0.0706507	4.14099	0.200879	0.0336698	0	0	0	0	0	0	0.972216	0	0.454589	0.0442874
mm433	0	0	8.76177	0	0	0	0	0	0	0	0	0	0	0	0	0	0	0	0	0.0133874	0	0	0	0	0	0	0	0	0	0	4.08513	4.26841	0	0	0	0	0	3.32535	0	0	0	0	0.0336947	0	0	0	0	0	0
hs932	0	3.87541	0	0	0.0111428	0	2.12597	0	0	0	0	0	0	0	0	0	0	0	0	0	0	0	0	0	0	0	0.0226383	0	0	0	0.029051	0	0	0	7.64339	0	0	0	3.5174	0	0	0	0	2.14006	0	0.839544	0	3.14302	2.47671
mm935	0	4.09477	0.0204059	0	0	0	0.0531293	0	0	0	0	0	0	0	0	0	0	0	0	0	0	0	0	5.63597	0	0	0	0	0	0	0	0	0	0	0	0	0	0	6.4663	4.01148	2.6543	4.35132	4.14882	0	0	0	3.75791	6.69319	5.26597
hs1694	4.51856	4.27722	0.159692	0	0	0	0	0	0	0	4.91429	3.59057	0.0144346	0.265811	4.18501	0	0	0	0	0	0	0.0146984	0	2.36283	0	0	0	4.08566	4.19928	0	2.11104	2.41645	0	0	0.0855394	0	0.575231	3.55817	0	0	3.45725	0	0	0	0	0	0	0.0419515	0
mm482	0	0	0	0	0	0	0	0	0	0	0	0	0.0105924	0	0	0	0	0	0	0	0	0	0	0	0	0	0	0	0	0	0	0	0	0	0	0	0	4.65751	4.93132	0	4.01155	4.48495	4.1907	0	0.0171066	0.237064	4.33965	5.40722	4.43965
hs1644	0.0180814	0	0.10518	0	4.54554	0	0	0	10.4181	0	3.37735	0.114279	0.201153	3.22828	0	0.0213269	0.020353	0.0126093	0	4.21009	0	0.0685369	0	0.0530129	4.25655	0	0	0.0757428	3.6999	0.0729023	5.5465	0.512215	4.11921	0	6.85081	0	0	12.6705	0	0	0	0	0.0240813	0.0172016	0.747502	0	0	0.0669939	0
hs1832	0	0.017996	0	0	0	3.22913	3.06148	0	0	0	0	3.39167	0	0	0	3.35586	0	0	0	0	0.959838	0.0234269	0	2.07332	0	0	0	0	0	0.0136741	0	0	0	0	0	0	0	0	5.05179	0	9.16559	4.47078	4.36713	0.0232575	0	0	0	5.26228	0
mm140	1.49613	1.80836	0	0	0	3.69815	3.75565	3.2941	0.965449	0	0	3.5129	7.78887	0.0542922	0	0	0	0.0317872	0	3.92494	3.35222	3.1541	0	1.25363	0	0	0.0510582	0	0	0.862199	0	0	0	0	0	0	0.0333773	3.54644	4.17706	0	4.32148	0	0	0	0	1.35121	0	6.7855	0.77364
hs1351	0	0	0	0	0	0	0	0	0	0	4.15366	0	0.274456	0	0	4.32728	4.29328	0.073051	0	0	0.306065	0	0	0	0	0	0	4.7528	7.87686	0	10.8005	10.6751	10.4358	0	5.12436	4.47625	0.307897	4.95017	4.90595	4.37538	4.96066	3.91913	0	0	0	0	0	4.46344	4.49147
mm46	0.0879173	1.83586	3.02806	0.0495222	0.184168	0	0	0	0	0	0.507005	1.71412	0	0	1.35119	0	0	1.00766	0.0471755	4.28316	0	0	0.0150363	3.73941	0.144812	0.376014	4.10964	0	0	0	2.81878	0	0	0	0	0	0.0486544	0.0261938	10.0919	0	6.54709	2.93245	0	0.556186	0.0392461	0	3.19557	4.52318	0
mm766	0	0	0.574088	0	0.0670144	0	0	0	0	0	0	0.362481	0	0.0344998	0	0	0	0.125988	0	0	0	4.75303	0	0	0	0	0	0	0	0	11.122	6.10534	7.92356	0	7.57554	3.94151	4.17314	3.92413	5.65825	0	4.76581	4.49844	4.35524	0	0	0.388932	4.96509	5.39517	4.61123
mm767	0.0988719	0.15054	0	0	0	1.45969	0.458581	1.46169	0.0128101	1.40565	0	0	0	0	0	0	0	0	0	0.447605	1.42583	0	1.56218	0	0	0	0.0416171	0.0356451	0.0296275	0.0286509	0	0.0860681	0	0	0	0	0	0	0	0	0	0	0	0	0	0	0	0	0
mm764	0	0.0569367	0	0	0	0	0.0155849	0	0	0	0	0	0	0	0	0	0	0	0	0	0	0	0	0	0	0	0.596127	0	0	0	0.457536	0	0.467464	0	0.0610524	0	0	0	0	0	0	0	0.0237722	0	1.24708	0	0	0	0
mm763	0.0907755	0.412584	0	0	0	0	0	0	0	0	0	0	0	0	0	0	0	0	0	0	0	4.65198	0	0	4.00984	0	0	0.627107	0.453227	0	0	0	0	0	0.190471	0	0	0.366899	0	0	0	0	0	0	0	0	0	3.25565	0
mm762	0	1.12058	0	0	0	0	0	0	0	0	0.128436	0	0.112436	0	0	0	0	0	0	0	0	0	0	0.0298129	0	0	0	0	0	0	0	0	0	0	0	0	0	0.0789037	0	0	0	0	0	0	0	0	0	0	0
mm765	0	4.26014	0	0	0	3.27738	3.61764	2.95385	0	0	0	0	1.72527	0	0	0	0	0	0	7.94205	2.73674	0	7.75344	3.86983	0	0	2.91165	0	0	0	1.42102	0	0	0	3.9984	0	0	4.04125	7.78637	0	0	0	0	0	0	0	0	3.94527	0
mm693	0	0	0	0	0.598686	0	0	0	0.0852331	0	2.93821	0	0.021117	0	0	0	0	0	0	0	0	0	0	1.06419	0	0	0.492511	0	0	2.11427	1.56581	3.15456	0.0251134	0	2.23999	0	0	1.06219	2.81887	0	2.26563	0	0.213194	0	0.182841	0	0	0	1.67473
hs1302	4.64016	0.0276482	0	4.58336	0	0	0	0	0	4.07676	4.65561	4.51972	0.0427188	0	0	0	0	0	0	0	0.0495569	4.00665	0.0574188	4.9296	4.82391	0	4.64397	4.70774	4.70774	4.40671	8.64395	5.9057	9.04959	4.91364	9.04248	9.63481	4.29103	9.35712	3.45897	0	0	0	0.798099	0.0740086	0	2.13196	0	3.83574	4.24046
hs1690	4.06378	0.0614677	0	2.94725	0.0106818	0	0	0	0	0	0	0.477842	0.143429	0	4.24949	0	6.65897	0.0693303	0	0.245125	0	0	0.109344	5.07213	3.96198	0	1.28163	0	0	0	4.75472	3.66961	5.00518	0	7.75949	0	0	8.14052	5.19253	0	8.1857	0	0.291535	0	4.14752	0	0	0.0460398	10.9819
hs2394	0	0	0	0	0	0	0	0	0	0	0	2.96468	0.144873	0	0	0.0169051	0	0	0	0	0	0	0	0	0	0	0	0	0	0	0	0	0	0	0	0	0	0	4.27363	0.224641	4.26419	0.254104	0.262462	0	0	0	0	4.53213	0.197751
hs1189	4.76447	13.769	0	0	0	0	0	0	0	0	4.17701	1.56911	0	0	0.0930536	0	4.04483	0	0	0	0	0	0	0	5.51004	0	0	0	4.00656	0	0	0	0.341417	0	0	0	0.0313995	1.3028	0	0	0	0	0	5.57025	0	0	0	0	0
hs1033	4.66154	6.37263	0	0	0	0	0	0	0	0	4.33724	0.600627	4.46137	0	4.04576	0	4.10414	0	0	0	0	4.12245	0	0	4.19044	0	0	4.02826	0	0	4.34032	4.67292	3.79923	0	0	0	0	0	0.0740829	0	4.05159	0	0	8.96092	0	0	0	0	0
hs1483	0	4.3837	0	0	0	0	0	0	0	0	0	0	0	0	0	0	0.0355949	0	0	0	0	0	0	0	4.09642	0	0	0	0	0	0	0	0	0	0	0	2.61687	1.52523	0	0	0.0110382	0	0	0	3.80343	0	0	2.13476	0.184959
mm228	0	0	0.024456	0	0	0	0	0	0	0	0	0	0	0	0.0141418	0	0	0	0	0	0	0	0	0	0	0	4.0846	0	0	0	2.64606	0	2.79654	0	0	0	0	0.119366	0	0	0	0	0	0	0	0	0	0	0
hs1501	0	0.600775	0.0417364	0	0.0375202	1.54775	1.46479	0	0.0464378	0	0	0	1.27738	0	0	1.81315	1.41889	0	0	1.66162	0	0	0	0	0	0	4.741	0	0	0	0.025907	0	0.0395976	0	0.0301454	0	0	0.024911	0.0181309	0	0.0125648	0	0	0	0	0	0	0.0277451	0
mm87	0	0.605906	1.49103	0	0.321628	0	0	0	0	0	5.60781	0.144852	1.71651	0	0	0	0	0	0	0	0	0	0	0.290686	0.0970379	2.89364	0	0	0	0	0.0133691	0.748748	0	0	1.21728	0	0.224102	0.0467009	0.487283	0	1.60566	0.580237	0	1.90863	0.0346349	0.0242337	0.550271	1.02814	1.0007
hs1452	0	0.0587338	0	0	2.49416	0	8.68263	0	0	0	0	0	0	0	0	0	0	0	4.37425	0.397063	0	0	0	3.13977	0	0	0	0	0	0	2.58779	2.73427	2.26014	0	1.51769	0	0	0.107346	4.26839	0	4.23218	4.90224	4.80478	0	0	0	4.69363	9.15236	5.42298
hs1738	0	3.24977	0.266026	0	0	0	0.0145721	0	0	1.00973	0.0774612	0.0249491	0	0	0.0231777	2.53627	2.90502	0	0	0	1.00118	3.34764	0	4.29992	0.25231	0	2.77903	3.21422	0	4.37373	3.99021	3.1506	4.26023	0	6.6433	4.96546	4.60361	0	0	0	0	0	0	0	4.15613	0	0	0.0117651	5.90121
hs292	4.05453	4.12436	0	0	0	0	0	0	0	0	4.01592	0	0	0	0	0	0	2.05398	0	0	0	0	0	0	0	0	0	0	0	0	4.28067	4.12518	0	4.24413	3.00106	4.06198	0	0	8.17638	0	0	0	0	0	0	0	0	4.266	4.44733
hs2319	0	4.82974	0	0	0	0	0	0	0	0	0	4.23433	4.64397	0	4.55596	0	0	0	0	0.0229435	0	0	0	0	0	0	0	4.1296	0	0	3.7079	4.32257	0	0	0	0	0	0.0994641	4.43907	0	4.62893	0	0	0	0	0	4.45979	4.52999	6.82326
hs576	0	0	4.82974	0	0	0	0	0	4.00349	0	4.00524	0	0	4.4117	0	0	0	4.37686	0	0	0	0	0	0	5.39794	4.01558	0	0	0	0	4.0418	4.39838	0	0	4.20744	0	0	13.1187	0	0	0	0	0	0	4.45717	4.1152	0	0	0
mm782	0.0975912	0.0102574	0.0275817	0	3.02431	0	0	0	0	0	0	0	0.173969	0	0	0	0	2.35736	0	0	0	0	0	8.79047	0	4.28743	0.0166414	0.0531964	0.0531964	0	0	0	0	0	2.84557	0	0	7.12035	0.0337542	0	0	0	0	0	0	0.875465	0	4.42499	0.0413856
hs2189	0	1.14463	0	0.296694	0	0.5621	0.50289	0	0.0883352	0	0	0.0157189	0.0191735	0.0701448	0	0	0.0108312	0	0.313276	0.552228	0	0.0110873	0.547217	0.0670404	0.315174	0	3.79807	1.04493	1.39822	1.37601	0.236297	0.263796	0.0501644	0	0.0770399	0	0	0.475532	2.6257	0	0	1.57955	2.85146	0	2.50286	0	1.60358	2.62146	2.95368
mm74	0.0386903	0.0666398	0.489792	0	0	0	0.0652346	0	0	0	0	4.43156	0	0.0432761	1.93968	0	0	0	0	0	0	0	0	0	0.0617398	0	0	0.0743923	0.0641646	0	1.99048	0	0.0311138	0	0	0	0	4.02863	0.0933972	0	0.0783802	0.064663	0.0833081	0.409711	5.27233	0.105081	0	0.0501878	1.20682
hs2372	0	0.0153739	0	0	0	0	0	0	0	0	0	0	0	0	0	0	0	0	0	0	0	0	0	3.82893	0	0	0	0	0	0	1.99472	1.03737	0	0	2.35582	0	0	0.0157071	0.134681	0	0	0	0	0	0	0.0241913	0	0.118106	0
mm65	0	0	0	0	1.5355	1.61704	0	0	0	0	0	0	0.579062	0	0	3.01769	0	0	0	0	0	1.52421	0.0760498	0	0	0	0	0	0	0	0.0266995	0	0	0	0.0221291	0	0.0451134	0.442168	0	0	0	0	0	0	0	0	0	2.67491	0.0203725
hs1834	0.0353842	0.0201543	0	0	0.736264	0	0	0	1.12793	0	0.0363248	0.579818	2.41966	0	0	0	0.0298432	0	0	0.279036	0	0	0	1.12893	0.191375	0	0.329971	0.0554773	0.0554773	0	0	0.103378	0.0494136	0	0.165854	0	0	0.117613	0.482219	0	3.71155	0	4.4019	0.0390301	0.0185679	0.103172	0	5.07475	0.873887
mm1303	0.0129171	0.0135761	0.018871	0	0.229724	0	0.993367	0	0	0	0	1.00227	0.804683	0.776408	0.0941419	0	0.103008	0	0	0	0	0	0	0.37384	0	0	0	0	0	0	0.345588	0.304941	0.39608	0	0.0530704	0.016316	0	0	0.0656049	0.0669327	3.21213	0.0744986	0.0729969	0.0108312	0	0.21512	0.0702604	1.04656	0.135374
hs1699	8.18228	12.4276	4.86967	0	7.83702	0	0	0	4.08619	0	0	4.26761	0	0	0	0.588311	7.66311	0	4.03879	0	0	0	0	0	10.551	0	0	4.96658	5.5784	4.87615	6.11014	8.8589	8.34332	0.0361946	8.61716	0	0	4.81816	4.21779	0	4.05021	4.00087	0	13.3433	4.05046	6.71006	0	0.353548	0
mm1382	0	0.0760121	2.63713	0	0.11937	0.467332	0.139967	0.228352	0.271167	0.233811	0	0	4.32729	1.45255	0	1.7199	1.4813	0.928221	0	0	0.249522	0	0.0864292	0.165017	4.59039	0	0	0	0	0	0.574196	0	0.602706	0	0	0.533066	0	1.30797	4.22761	0	0	0	4.32735	0	0	0.0848429	0	4.29789	0
hs727	4.0928	3.82079	0	0	0	0	0	0	0	0	0	0	2.95912	0	0	0	0	0	0	0	0	0	0	0	0	0	0	0	0	0	0	0	0	0	0	0	0	4.0578	0	0	0	0	0.463712	4.04871	0	0	0	4.19697	0.148101
mm758	0	0.690472	0	0.510793	0	0	0	0	0.67886	0	0.0297833	0.104734	5.14	0	0	0	0	0	0	0	0.465406	0.503845	0	2.20628	0	0	0	0	0	0	2.49073	0.422688	1.82085	1.31405	0.36297	0	0	0.0632009	3.97201	0.0484659	0.336801	0.0379018	0	0	0	3.88689	0	4.29948	0.140914
mm200	0	0	0	0	0	0	0	0.0337284	0	0.0402365	0.159448	0	0	0	0	0	0	0	0	0.0363423	0.0320997	0	0	0.621595	0	0	0	0	0	0	3.49712	0	0	0	0	0	0	0	0.392588	0	0	0	0.445898	0	0.0472291	0	0	0	0
mm52	0.764979	0.869507	0	0	0	0	0	0	0	0.255761	0	0	0.030322	0	0	0	0	0	0	0	0	0	0	3.50328	0	0	0	0.76784	0.71254	0.771635	0.692391	3.37443	0.480994	0	0.735358	0	2.77917	0	0.0348455	0	0.242969	0.423541	0	0	0.0167659	7.65036	0	0.245666	0
hs1723	0	4.22601	0.0166296	0	0.329216	0	0	0	0	0	0	0	0	0	0	0	0	0	0	0	0	0	0	0	0	0	0	0	0	0	0.0108451	3.85032	0	0	4.85707	0	4.15831	0.127116	0	0	3.99077	0	0	0	0	0.26258	0	4.09254	0.253442
hs1575	8.27751	4.44349	0	0	0	0	0	0	0	0	4.01536	8.11856	11.0076	0	0	0	0	0	4.7249	0	3.78058	5.54894	0	3.15024	0	0	0	5.12103	4.92088	5.47821	5.53139	3.37595	1.57354	0	0	0	0.0382786	3.59709	0.0132572	0	0	0	0	3.83536	5.22824	0	0	0	0
hs967	0	4.23433	0	0	0	0	0	0	0	0	6.61083	2.75539	0	0	0	0	0	2.12534	0	0	0	0.0428773	0	0	0	0	0	0	4.60906	4.15614	0	1.87642	0	0	3.13186	0	0	0	4.04818	0	4.43297	0.914332	0	0	0	0	0	4.20136	0
hs1540	8.78854	8.9052	0	4.35407	1.3876	0	3.58585	0	1.44408	0	0.053363	5.03005	4.84565	0	0	0	0	0	3.96209	0	0	3.74604	0	0	8.54261	0	0	4.57389	4.59661	4.46344	1.30124	3.10159	1.47184	0	5.78188	0	4.20603	1.77036	4.51713	4.36351	3.35833	4.20066	4.14935	4.49816	0	3.48503	0	4.12726	3.92499
hs1114	0	0	0	0	0	0	0	0	0	0	0	0	4.66718	0	0	0	0	0	0	0	0	0	0	2.62069	0	0	0	0	0	0	4.31966	9.65792	4.75598	0	8.9973	0	0	6.25085	0	0	0	0	0	0	0	0	0	0	4.1986
hs1122	4.15933	4.70333	0	0	0	0	0	0	0	0	0	0	11.8496	0	0	0	0	0	0	0	0	0	0	0	0	0	0	4.24718	4.08566	4.46149	0.135555	5.19483	0	0	1.49164	0	0	4.00476	0	0	0.0234478	0	0	4.89332	2.78531	0.433497	0	0.0220313	0.215105
mm694	3.54494	3.73858	0	0	0	0	1.0648	0	0	0	0.01966	0.0274353	0	0.451951	4.33478	0.0631517	0	4.58106	0	0	0	0	0	0	0	0	0	4.39103	5.53419	3.39478	0	0.343334	0	0	0	0	0	1.38292	3.42956	0	0	0	0.0149284	3.42344	0	0	0	5.6595	0.013496
hs2152	0	0.0425767	0	0	0.0334286	0	0	0	0.0335937	0	0	0	2.9851	0.0442297	0	0.0381063	2.44668	0	0	0.0208804	0	0	0	6.57509	0	0.450665	1.57065	0	0	0	0.450217	0.0642235	0.490731	0	0.308761	0	0	2.35693	0.13751	0	0.0531872	0	0	0	0.835221	0.0290726	0.047771	0.44411	1.94397
hs1341	8.475	8.865	0	0	0	0	0.0437059	0	0	0	4.46092	0.292865	0	0	0	0	0	0	0	0.449502	0	0	0	0	0	0	0.196921	0	4.19654	0	0	4.65624	0	0	4.66697	0	0	4.65043	0.505617	0.0581184	0.0727671	0.0583137	0.0649595	4.02641	0	0	0	0.0616654	1.25936
mm313	0	0.82343	0	0	0.0520925	0	0	0	0	0	0	0	0.0268995	0	0	0	0	0	0	0	0	0.808887	0	0	0	0	0	0	0	0	0	0	0	0	0	0	0	0	0	0	0	0	0	1.79741	0	0	0	0	0
mm696	0	0.0840256	0	0	0	0	0.287165	0	4.34108	0	3.29702	0	4.01872	0	0	0.20851	0.0258406	0	0	0	0.222689	3.62144	0	4.29639	3.13471	0	0	0	0	0	5.20894	0	0.0197051	0	4.64397	0	0	2.60402	4.46816	0	0	0	0	0	4.1827	0.481038	0	9.03365	4.9914
hs943	0	0	0	0	0	0	0	0	0.140422	0	0	0	0	2.8616	0	0	0	0.0288089	0	0	0	0	0	8.44953	4.73965	2.562	0.87794	0	3.95031	0	0	0	0	0	0	0	0	0	0	0	0	0	0	0	0	0	0	0	0
hs1498	0	3.5705	0	0	0.103951	0	0	0	0	0	0	0	0	0	0	0	0	0	0	0	0	0	0	1.21306	0.0853718	0	0	4.70997	4.40894	4.70997	0	0	0	0	0.0203862	0	0	0.0243312	0.0230125	0	3.65476	0	0.31296	0	0	0	0.0217194	0.402019	0.0224316
mm569	4.65936	1.5673	0.015101	0	0	0	0	0	0	0	0	2.43113	0	0	0.42973	0	0	4.19442	0	0	0	0	0	3.10884	1.05078	0	0	0	0	0	1.03258	0.0950669	0	0	0	4.21935	0	3.50492	3.7374	0	3.26821	4.54714	3.45455	4.16803	0	0	4.0771	7.76879	4.34205
mm697	0	0	0.0208512	0	0	0	0	0	0.278257	0.522052	0.0181406	0.0499729	0.0195634	0.0165817	0	0	0	0	0	0	0.0475087	0.0454115	0	0.247831	0	0	0	0	0	0	0	0	0.0674083	0	0.0449865	0	4.72346	4.11579	0	0	0	0	0	0	0	0	0	0	0
hs1427	0	0	0	0	0	2.27776	3.77289	0	0	0	4.22528	2.80779	4.29328	0	0	0	0	0.0106891	0	0	2.28995	0	3.51211	0.013886	0.0176854	0	0	0	0	0	3.21466	0	3.23588	0	8.1448	0	0	4.46878	5.02273	0	5.27165	4.62525	4.03621	0	0.0331273	2.72926	4.16052	4.91364	0
hs1468	0.0302072	0.0133515	0	0	0.0361885	0	0	0	0	0	0	4.95468	4.66785	4.22511	0.0811499	1.06943	0	4.14509	0	0	0.0226085	0	0	4.08884	0.0630112	0	0	0	0	0	0.0210213	0	0	0	0.0369166	0	0	0.0423972	0.320525	0	0.324224	0.0724522	0	0.0722425	0	0	0	2.13471	0
mm1025	8.61733	4.91807	0	0.0188288	0	0	0	0	1.27771	0	0	4.95468	0.0126042	0	0	0	0	4.01086	0	0	0	0	0	0.448589	0.134465	0	0.226555	4.08513	0	0	4.22824	4.21157	0.0697193	0	0.219467	0	0	0.0166045	0.115242	0.114421	2.54698	4.32326	0.0200037	0	0.11237	0.172823	0	0.0888928	0.121638
hs877	0	0	0	0	4.12382	0	0	0	0	0	0	3.25786	0	0	0	0	0	0	0	0	0	0	0	0	8.3306	0	0	4.03198	8.62206	0	4.05586	0	4.30169	0	4.25493	4.06208	5.18768	0	6.10633	2.55588	6.95419	3.96785	3.88896	0	0	4.46048	3.799	8.17922	3.56376
hs961	0	4.44491	0	0	4.51088	0	0	0	4.0969	0	0	4.15246	4.007	0	0	0	0	0	0	0	0	0	0	4.10018	0	4.44612	0	0	0	0	6.4935	4.39005	3.95541	0	8.51762	2.55169	1.95583	0	0	0	0	0	0	0	0	0	0	0	5.04096
hs972	0	0	0	0	0	0	0.156173	0	0	0	0	0	0	0	0	0	0	0	0	0	0	0	0	0.0187593	8.40821	0	0	0	0	0	0	0	0	0	0	0	0	2.08382	0.0181361	0	0	0	0	0	0	0	0	4.37308	0
hs635	0	0	0	0	0	0	0	0	0	0	0	0	0	0	0	0	0	0	0	0	0	4.22768	0	4.45129	0	0	0	0	0	0	0	0	0	0	0	0	0	4.41235	4.50169	0	0	5.23684	0	0	0	0	0	0	0
hs2059	0	3.35993	0	0	0	0	0	0	0	0	0	1.21869	0	2.69654	0.185012	0	0	0	0	0	0	0	0	0.10508	0	0	4.28923	0	0	0	0.021475	2.64386	0.0221945	0	3.34494	0.022454	0	0.246532	0	0	3.15878	0	0	0	0	0	0	6.82388	7.34327
mm154	0	0	0	0	0.0158539	0.0243556	0.0241462	0.022596	0	0.0212225	0	0	0	2.22209	0	0	0.0267954	0	0	0.0240422	0.0223555	0	0	0	0	0	0	0	0	0	0	0	0	0	0.0123	0	0	0.0191211	0	0	0	0	0	0	0.0144448	0	0	0	0
mm178	0	0	0	0	0	0	0	0	0	0	0	0	0	0	0	0	0	0.0633991	0	0	0	0	0	0	0	0	0	0	0	0	0	0	4.07807	0	3.85657	4.07807	4.86786	0	0	0	0	0	0	0	0	0	0	0	0.240126
hs1565	4.11014	4.42251	0	0	0	4.02656	4.05175	4.22906	0	4.39044	5.02083	0.209051	0.5865	0.0156573	0	0.329922	0.347543	3.60606	0	0	4.13925	0	0	0.216616	0.484423	4.12686	9.0127	0	0	0	0	4.51584	0	0	3.94588	0	0	5.50283	4.12164	0.206949	4.29168	0	0	8.86033	0	0	0.159662	4.30559	4.14535
hs1584	5.71444	4.79317	0	0	0.0414944	0	0	0	0	0	0	0.109429	0	0	0	0	4.48017	4.15577	0	0	0	0	0	0	3.92082	0	0	4.23284	4.27409	0	0	0	0	0	0	0	0	0	0.020488	0	0	0.108557	0	4.40782	0	0.0423302	0	0	0
hs831	0	0.792269	0	0	0	0	4.25259	0	3.3737	0	0	0	0	0	1.52182	0	0	0	0	0	0	0	0	0	8.28771	0	4.11295	0	0	0	4.03716	0	0	0	4.47237	0	0	4.02743	0	0	0	0	0	0	0	0	0	0	0
hs1244	0	4.4217	0	0	0	0	4.10221	0	0	0	4.05396	0	0	0	0	8.26847	0	0	0	4.50352	0	0	0	0	3.55332	0	0	4.22185	4.03763	4.41117	0.0420462	0	0	0	0	0.0482328	0	0	0.237571	0	0.275641	0	0	0	0	0	0	0.270531	4.23718
hs1197	0.0952045	1.08426	1.92345	0	4.0511	0	4.40561	0	0	0	0	0	0	0	0	4.31381	3.0549	0	0.0520792	0	0	0	0	0.0126046	4.23657	0	0	4.20566	3.91783	3.84847	4.51252	0	0	0	0.0226808	0	4.20971	0	0.0539085	0	0.049692	0	0	0	0	0.0124831	0	4.04479	0
hs1210	0	4.18327	0	0	5.82391	0.199245	0	0	4.05552	0	0	1.07841	0	0	0	0	0	0	0	0	0	4.54363	0	4.1332	5.24642	0	0	3.71903	4.30452	0	0.0140544	0	0	0	4.08407	4.5391	0	4.03377	0	0	0	0.922437	0	0	0	3.81349	0	5.13194	4.39215
hs1206	4.5867	4.37729	0	0	0	0.0628205	0	0	0	0	0	0	4.3708	0	0	0	0	4.85523	0	0	0.0921813	0.0871442	0	0.100349	0	0	4.18376	4.39469	4.16431	0	4.11097	7.94041	0	0	8.6428	0	0	4.27654	0	0	0	0	0	4.02091	0	0	0	0	4.75558
hs1110	0	4.0673	0	0	0	0	0	0	0	0	0	0	0	0	0	0	0	0	4.08566	0	0	0	0	3.55395	0	0	0	0	0	0	0	0	0	0	0	0	0	0	0	0	0	0	0	0	0	0	0	0	0
hs1229	4.04576	8.30517	0	0	0.211395	0	0	0	0.228304	0	0	0	0.226911	0	3.99966	0	4.45346	0	0	0.0187388	0	0	0	0	0	0.0282417	0	4.42366	0	4.43418	3.24783	3.56975	3.22958	0	4.88377	0	0	5.68063	0	0	0	0	0	0	0	0	0	0	0
hs205	4.53165	9.65961	0	0	1.76786	0	4.84164	4.04287	0	0	0	0	0	0	0	4.90309	9.35028	0	0	0	0	0	0	1.54972	4.35655	0	0	8.10611	4.05306	4.33292	0	4.04313	0	0	4.13237	0.337062	0	0.0779204	0	0	0	0	0	0	0	4.00496	4.24718	4.01637	0
hs1066	8.89273	12.6141	0	0	0	0	0	0	0.81977	0	0	11.4998	8.50187	0	0	0	0	0	0	0	0	0	0	0	4.10237	0	0	0	0	0	0	1.32302	0	0	0	0.0172048	0.92438	0	0	0	2.18322	0	0	0	0	4.06289	0	0	0
hs725	0	3.33166	4.00966	0	0	0	4.3098	0	0	0	0	0	0	0	0	0	0	0	0	0	0	0	0	0	0	0	7.5867	0	4.5737	4.09897	4.29322	4.70774	8.33145	0	0	0	0	1.63278	0	0	0	0	0	0	4.31336	0.0148912	0	3.74041	0
hs1874	0	0	1.17709	0	0	4.10237	0	0	0	4.26122	0	0	0	4.22915	4.06217	0	4.22841	0	0	0	4.5544	4.05601	0	0	4.80967	0	0	0	0	0	0	0	0	0	0	0	0	3.78701	3.98075	0	0	0	0	0	0	0	0	0	4.01818
hs690	7.18177	2.96432	0	0	0	0	0	0	0	0	0	0	0	0	0	0	0	0	0	4.03148	4.01144	4.11014	0	9.63536	0	0	0	4.70774	4.70774	4.40671	0	0	0	0	0	0	0	0	0	0	0	0	0	2.72592	4.64782	0	0	4.75194	0
hs1142	5.36351	8.99129	0	0	1.93772	0	0	0	0	0	4.05208	4.74715	0	0	0	0	0	0	0	0.014665	0	0	0	2.22787	0	0	0.111819	0	0	0	1.0288	1.08834	0	0	1.61974	0	0	8.24265	1.24407	0.925313	1.12474	0	0	4.04672	0	0.515598	0	4.84249	0
hs1176	0	0	0	4.43533	0	0	0	0	4.07935	0	0	0.044809	0.0276692	0	0	0	4.05453	0	4.51999	0	0	0	0	5.3019	0	0	4.22548	0.0707785	0	0	0	4.30986	3.72307	0	6.47742	0	0	0	4.48545	0	4.07572	4.13787	2.95638	0	4.6517	8.62672	0	4.58336	0
hs957	0	4.01909	0	0	5.13942	0	0	0	4.04383	0	0	8.31713	0	4.35853	4.02083	0	0	4.47496	0	0	0	4.09583	0	0	0	0	0.925005	4.70997	4.40894	8.71477	5.41986	0.0446461	4.34198	0	1.8152	8.1362	8.67392	0	1.94806	0	1.11367	1.30319	4.46152	4.42481	0	0	0	1.34916	0
hs1111	8.97997	9.02714	0	0	2.99601	0	0	0	0	0	0	4.62709	4.17201	4.05849	5.38443	4.89279	4.11862	0	0	0	0	0	0	0	0	0	1.13121	4.72354	4.72354	4.42366	7.63684	3.88724	3.25549	0	5.28636	0	4.4543	8.46179	0	0	0	0	0	9.45749	0.971254	3.63171	0	4.29328	4.02
hs1535	13.3837	4.85387	4.58838	0	2.99406	0	0.0249319	0	0	0.0108836	0	0.0440999	4.00177	1.48333	6.41409	5.48216	4.17553	0	0	0.0117787	0.0101638	0	0	0	11.8697	0	0	8.13724	8.54414	4.05899	6.86003	4.29758	0	0	4.10753	0	0	4.64352	4.21903	0	3.53645	0	0	0.196681	0.0103944	5.97808	0	3.20735	2.88715
hs399	9.85443	4.5867	0	0	0	0	0	0	0	0	4.24033	0	0	0	0	0	0	0	0	0	0	0	0	0	4.46471	3.95143	0	8.17131	8.39857	0	5.36251	4.5986	5.17198	0	0	0	0.543844	0	4.34793	0	0	0	2.1542	0	0	0	0	0	0
hs779	4.27737	4.08725	3.9514	0	0.505844	0	4.66155	0	0	0	0	4.67308	0	0	0	0	0	0	0	0	0	0	0	4.1343	4.09205	0	0	4.08566	4.19928	0	4.24795	4.13077	0	0	0	0	0	8.23886	0	0	0	0	0	0	0	0	0	0	0
hs946	0	0	0	0	0	0	0	0	0	0	0	0	2.62088	0	0	0	0	0	0	0	0	0	0	3.98713	0	0	0	0	0	0	0	0	0.219051	0	1.06745	0.0150634	0.165023	0.0729325	0	0	0	0	0	0	0	0	0	0	0
hs397	4.58503	6.11464	4.77211	0	0	0	4.32698	0	4.03433	0	4.51226	0	0	4.03126	0	0	0	0	5.10018	0	0	4.83565	0	0	0	0	4.42022	0	0	0	0.180592	2.33795	0	0	4.33613	0	0	6.67044	0	0	0	0	5.25596	0	0	0	0	0.0173572	3.68688
hs1120	0	0	0	0	4.99306	0	0	0	0	0	0	0	0	4.2373	4.4045	0	0	0	0	0	0	0	4.44491	0.11412	0	0	0	0	0	0	8.1089	5.10788	3.9266	0	4.58805	0.129976	0	7.86371	0	0	0	0	0	0	0.399415	4.45091	0	0	0
hs396	0	0	4.27409	0	0	0	0	4.02872	4.43475	4.5157	4.01011	0	0.0702009	4.82681	8.52941	0	0	0	0	0	4.95468	4.20352	4.91042	4.43903	0	0	4.3019	0	0	0	11.1937	3.10089	1.72899	1.34097	0	0	0	4.33129	4.67778	4.26043	5.13727	0	5.19586	4.22403	0	0	0	6.17477	4.83863
hs822	13.0498	1.89295	0	0	4.25098	4.23948	4.40003	4.29697	7.40567	4.12943	0	3.68187	4.94156	3.49959	0	0	0	0	0	0	4.17587	0	0	4.3363	0	0	4.09909	8.33284	8.28494	4.72354	8.99403	4.12784	4.18582	0	0	0	4.16685	4.06029	9.04292	0	3.7888	0	0	4.14569	0	0.042882	0	9.75682	0
hs1072	0	5.03292	0	0	7.20901	0	0	0	0	0	0	3.8418	0	0.0275786	0	0	0	0	0	0	0	4.08991	0	0	3.60542	0	0	0	0	0	0	4.41567	0	0	0	4.53663	12.3061	0	0	0	4.11799	0	0	0	0	0.0275683	0	0	0
hs1164	0	4.34861	0	4.39903	4.06298	0	0	0	0	0	0	4.636	4.63711	0	0	0	0	0	0	0	0	5.05355	0	0.456361	0	0	4.42946	0	0	0	3.85514	3.99382	2.8911	0	2.97708	2.85101	0	4.2426	0	0	0	0	0	0	0	3.34463	0	7.01237	0
hs1021	0	0	0	0	0	0	0	0	0	0	4.87095	4.97881	0	0	0	3.79445	0	4.55743	0	0	0	4.02687	0	0	0	0	0	0	0	4.03245	0	0	2.94405	0	0	0	0	0	4.9914	4.80134	4.83863	4.18442	4.77469	0	3.03261	0.302313	0	4.47496	0
hs395	0	0	0	0	0	0	0	0	0	0	0	4.15009	2.17332	0	0	0	0	0	0	0	0	0	0	0	0	0	8.71861	0	0	0	0	3.81963	0	0	2.92166	0	0	0	0	0	0	0	0	0	3.09632	0	0	0	0
hs1209	4.20135	0	0	0	0	8.0384	8.55633	4.34582	6.70009	4.61439	4.32514	0	0	0	0	0	0	0	0	4.19786	4.44977	4.01268	8.8768	0	1.40609	0	0.0480395	4.05306	5.53018	0	1.64379	0	0	0	4.04027	4.16562	4.08923	0	4.03433	0	4.90658	4.10481	4.81861	4.29158	0	7.92552	0	8.36293	3.93394
hs1057	5.22988	7.49441	4.03664	0	0	0	0	0	0	0	0	0.0173445	0	0	4.2993	4.09339	4.23647	0	0	0	0	4.2644	0	0.0629366	3.94926	0	4.10691	4.28988	8.36505	4.42366	4.65918	3.70313	4.68608	0	4.81563	4.67366	0	4.4318	3.82541	0	4.39298	0	3.20403	4.21183	4.44129	5.77565	4.31966	4.08821	4.41915
mm698	0.62317	0.149385	0	0	0	0	0	0	0	0	0.0188771	0.734603	1.93671	0.0461712	0	0	0	0	0	0	0	0	0	0.124811	0	0	0.0284568	0	0	0	0	0	0	0	0	0	0	0.239089	0.0642412	0	0.0103032	0	0	0	0	0.0138882	0	0.0517987	0
hs394	4.95861	3.76379	0	0	0	0	0	0	0	0	0	0	0	0	0	0	0	0	0	0	0	0	0	4.03012	0	0	0	5.15081	15.2469	4.73758	0	0	0	0	0.266396	0	0	4.34413	0	0	0	0	5.10617	4.42251	0	4.53271	0	4.21343	0
hs836	3.99547	4.10012	0	0	0	4.34348	4.42481	0	4.78484	0	5.78267	0.0467161	4.49485	0	0	0	0	0	4.06198	0	4.04831	0	4.4544	0	0	0	0	0	1.47923	1.17448	4.28216	4.08855	0	0	0	3.45472	4.6285	0	4.2156	0	0	4.48999	4.38091	0	0	3.10274	0	4.13076	0
hs1119	0	0	0	0	1.75433	0	0	0	4.82974	0	0	4.13194	0	0	0	2.93013	1.18688	0	0	0	0	0	0	0	0	0	0	0	0	0	0.109704	0	0.111605	0	0	4.74233	4.94473	7.82737	0	0	0	0	0	2.80901	0	0	0	4.10919	0
hs975	0	4.09474	0	0	0	7.63663	6.75331	0	0	0	0	4.05208	0.215803	0	0	4.08249	6.0752	4.10476	0	6.94489	7.29414	0	4.36012	4.12739	0	0	0	0	0	0	5.98783	2.8351	0	0	2.13541	0	0	8.89798	0	0	0	0	0	4.48413	0	0	0	4.47756	0
hs1154	4.27114	3.51214	0	0	0	0	0	0	2.9643	0	0	4.35041	4.20831	0	0	0.0506897	0	0	0	0	0	2.78187	0	0.492996	0.0249743	0	0	0	0	0	4.23136	4.01818	4.00877	0	4.47625	0	0	0.0401074	0	0	0	0	0.083235	0	0	0	0	0.137357	0
hs393	0	4.47366	0	0	8.49996	0	0	0	0	0	0	0	3.84972	4.02	3.18529	0	0	4.5784	0	0	0	4.09937	0	0	0	0	0	4.34872	0	0	0	0	0	0	0	0	0	0	5.43441	4.85292	4.81582	5.80584	5.80584	4.85699	0	0	5.80584	5.90938	5.65245
hs1181	0	0	0	0	0	4.00261	8.06514	0	5.23433	0	4.20691	3.9832	0	0	0	4.24718	0	4.07469	0	0	0	0	0	0	3.55909	0	0	5.10347	0	0	4.3279	4.23284	4.49757	0	0	0	0	0	0	0	0	0	0	4.5867	0	0	0	0	0
hs1196	3.62419	0	0	0	0	0.354724	0.041249	0.028389	4.50904	0.0342763	0	7.28428	1.48753	0	0	4.00612	0.0278985	0	0.630592	1.58866	0.0268234	0	0.0412481	0.0362068	0.692648	0	0	3.40029	3.40029	3.29982	0.575852	0	0	0	0	0	0	4.84224	0	0	4.81364	0	0	0	0	0	0	1.19136	4.13847
hs392	0	4.08725	0	3.6495	0	0	3.56014	0	4.15428	0	0	3.56509	9.83213	0	0	0	0	0	0	0	0	0	0	0	4.00524	0	4.27984	0	0	0	0	4.28319	4.91241	0	4.51713	0	0	0	9.39928	0	8.95182	0	0	0	0	0	0	8.06584	4.08725
hs391	0	3.01069	0	0	0	0	0	0	4.00991	0	0	0	0	0	5.45842	4.06702	4.22841	0	0	0	0	0	0	0	4.428	0	6.61526	0	0	0	0	0	0	0	0	0	0	0	0	0	0	0	0	0	0	4.12136	0	0	0
hs1199	0	0	0	0	0	0	4.20066	0	0	0	0	9.18256	0	0	0	0	0	0	0	0	0	0	0	0	0	0	0	4.05159	0	0	0	4.33732	0	0	4.03443	0	0	10.0588	4.67366	4.17718	4.48413	8.44984	6.52288	0	4.5784	3.89295	0	4.38616	0
hs1067	7.87682	5.70115	0	0	0.491625	0	0.0323786	0	4.64343	0.966674	0	0	0	0	3.99027	0	0	4.18243	4.1549	0	0	0	0	0	0	0	4.08407	9.43793	14.6639	9.13577	4.20621	0	0	0	0	0.0242216	0	4.23582	0	0	0	2.13038	4.2233	4.39755	0	2.64483	0	0.949052	0
hs1113	4.13852	4.19752	0	0	0	0.0583249	4.35754	0.0582094	0	1.36229	0	0	0	0	0	2.38915	6.81668	0	0	0	0.0640582	0	0.0670861	0	0	0	0	0	0	0	0.0192801	0.135622	2.4103	0	2.2188	2.72887	0	0.0122387	2.87771	0	3.04001	0	4.08884	0	0	0	0	0	3.14185
hs1232	0	3.38131	0	0	1.34378	0	0	0	0	0	4.06098	0	4.14474	0	3.14875	0	0	4.39652	0	0	0	0	0	4.32975	0	0	0	4.70774	4.40671	4.70774	4.16304	0	0	0	0.681771	0.0190279	0	0	6.44864	0	2.35537	0	0	0	0	0	0	0	0
hs1152	5.11634	8.27007	9.53201	0.0130784	0	0	0	0	5.77354	0	0	0	4.17552	6.3117	4.02411	0	0	4.31966	0	0	0.0144345	0.0153159	0	0	0	0	0	0	0	4.16494	0.110324	0.166681	0.107969	0.161977	0	0	0	4.86012	10.6274	0	0	0	4.55757	8.9783	0.0139749	0.021582	0	4.20135	0
hs1063	0	0	0	0	0	0	0	0	0	0	0	0	0	0	0	0	0	0	0	0	0	8.36024	0	0.0153589	4.16611	0	0	0	4.09691	0	0.0138332	0.0218415	0.0211092	0	0.0219578	0	0	4.03351	0.0114707	0	0	0	0	0	4.14752	0	0	0.0108382	0.012441
hs1018	4.64397	4.39903	5.60687	0	0	0	0	0	4.51999	0	0	4.04383	1.18797	8.38643	0	0	0	4.67572	0	0	0	0	0	8.99664	0	0	8.21664	5.76628	2.46174	0	5.54072	5.1888	4.89341	4.00013	0	4.00589	0	0	0	0	1.74131	0	0	0	3.8918	0	0	0	0
hs1071	0	7.26109	0	0	0	4.46092	4.2815	0	0	0	0.631354	0	0	0	0	0	0	0	0	4.19246	0	0	0	0	0	0	0	3.72425	3.72425	0	0	0	0	0	3.65663	0	0	0	0	0	0	0	4.4023	4.14976	4.01825	0	0	0	0
hs1012	4.56543	0	0	0	0	0	1.99463	0	0	0	0	0	0	0	0	0	0	0	0	0	0	4.27409	0	4.83268	0	0	4.71897	8.84277	8.46839	13.3142	0	1.51478	0	0	0	0	0	0	4.31515	0	0	0	0	0	0	0	4.25571	0	0
hs1174	9.85161	4.63015	0	0	4.19408	0	4.88168	0	0	0	0	0	4.13076	0	0	4.10346	0	0	0	0	4.13728	0	0	4.01682	4.77211	0	0	0	4.90658	5.38462	0	4.09083	1.62631	0	0	0	0	9.11598	0	0	0	0	0	5.63264	0	0	0	0	0
hs1076	0	0	0	0	2.23526	0	0	0	0	0	0	2.63036	0	4.04576	0	0	0	0.451605	0	0	0.0407368	0.0400423	0	4.07417	0	0	0	0	3.96472	0	0.0653504	0	0	0	0	4.15183	5.13227	7.99523	0.0121662	0	0.0104139	0	0	0	0	0	0	0	0
mm57	4.02237	1.25706	0	0	0.398587	0	0	0	1.29757	0	2.15621	0	0	4.13605	1.21018	1.06183	1.13184	3.55884	4.29158	0	0.134203	0	0	5.33245	0	0	0.010224	1.85634	0	0	4.242	0	4.0434	3.78964	0.094226	0	0	4.00215	0	0	4.01502	3.19479	0	0	0	0	0	0	0
hs937	4.09412	0	0	0	4.48641	0	0	0	4.54334	0	0	0	0	4.92281	0	4.34845	0	0	0	0	0	0	0	4.25092	4.09891	0	0	5.97736	5.22033	4.74757	13.9708	4.40253	7.82061	0	3.71291	0	0	0	0	0	0	4.01863	0	4.48515	0	0	0	0	0
hs390	0	0	0	0	4.07988	0	0	0	0	0	0	8.86661	0	0	0	0	0	0	0	0	0	0	0	0	0	0	0	0	0	0	0	0	3.216	0	0	0	0	0	0	0	0	0	0	0	8.7464	0	0	0	0
mm101	0	1.26676	0	0	0.0187866	0.101547	0	0	2.31528	0	0.0355495	0	0.0133865	0	0	0	0	0	0	0.103277	0	0	0.0815494	0	0	0	0.0140557	0	0	0	0	0	0	0	0	0.0156093	0.0166977	0	0.0118029	0	0.0344739	0	0	0.0357375	0	0	0	0.0275377	0
mm95	0	0	2.71636	0	0	0	0	0	3.29423	1.20209	0	0	1.78361	0.0107685	0	0	0	0	0	0	0.0109364	0.187388	0.0137454	0.0114232	0	0	0.0426094	0	0	0	0	0	0	0	0	0	0	0	0	0	0	0	0	0	0	0	0	0	0
hs596	4.22915	0	0	4.3279	0	0	0	0	1.17033	0	0	0	0	0	0	0	0	0	0	0	0	8.14894	0	2.95594	0	4.42133	0	4.34775	0	4.38828	4.44612	9.93561	9.18735	0	0	0	5.27435	4.36572	0	0	0	2.59582	4.48017	0	0	0	0	0	0
hs278	4.56864	0	0.0192853	0	4.27327	3.61321	3.79142	3.75163	0	4.71252	4.19586	0	0	0	0	0	0	0	0	0	3.75163	0	4.14805	4.18442	0	0	4.10565	0	0.0156829	0	4.02302	0	0	0	0	0	0	4.02872	0.160205	0	4.36668	4.26393	4.04325	0	0	0	4.31519	4.26143	8.66361
hs829	4.26255	0	0	0	0	0	0	0	0	0	5.06248	0	0	0	4.15428	0	0	0	0	0	0	0	0	0	4.28466	0	0	0	0	0	4.41214	0	0	0	0	3.77883	4.09865	4.51286	0	0	0	0	0	8.72411	4.13077	0	0	0	0
hs693	4.55129	0	0	0	0	0	0	0	0	0	0	0	4.08922	0	0	4.17849	4.25493	0	0	0	0	0	0	0	0	0	0	4.56137	0	0	0	0	0	0	0	4.04191	4.07263	4.4034	0.2726	0	0	0	0	5.6925	0	0	0	0.804928	0
hs608	0	4.58838	0	0	0	0	0	0	0	0	4.46725	4.13253	4.07831	4.25727	0	0	3.37321	0.108381	0	0.63314	0	0	0.301722	0.201431	0	4.17653	0	0	0	4.24185	0	4.1343	4.12263	0	0	2.48589	2.43884	0	4.22915	0	0	4.27246	0	0	0	0	0	0	4.62342
hs275	8.63838	8.38058	0	0	0	0	0	0	0	0	0	0.95457	4.26761	0.0107112	0	0	0	0	0	0	0	0	0	4.1986	9.16071	0	4.01079	0	8.04649	0	4.31426	4.20761	0	0	0	0	0	4.55752	0	0	0	4.17021	0	12.5958	4.61724	0	0	0	0
hs274	4.32975	7.47167	4.31158	0	4.05549	0	0	0	0	0	4.30434	4.35667	0	7.078	0	0	0	0	0	0	0	0	0	3.77829	4.10403	0	4.02641	9.1189	17.5757	8.57009	0	4.35717	0	0	3.89689	0	0	1.78636	0	0	0	0	0	0	0	2.29541	0	0	0
hs1123	0	0	0	0	0	0	0	0	0	0	0	0	5.057	1.47223	4.02327	0	0	0	0	0	0	0	0	9.27068	0	0	0	0	0	0	0	8.87108	0	0	4.83268	0	0	1.53638	0	0	0	0	0	0	0	0	0	0	0
hs1117	0	4.34104	0	0	0	0	0.193092	0	0	4.46644	0	0	0	3.93126	0	0	0	1.31409	0	0	0	0	4.13816	0	0.0245463	0	0	4.40671	5.37161	4.03245	0	4.0134	0	0	4.35159	0	0	4.15304	0	0	0	0	1.83929	4.11238	0	0	0	3.8816	4.04852
hs1022	0	8.81828	0	0	0	0	4.007	0	0	0	0	2.04558	0.726625	0.0336667	0	0	0	0	0	4.39903	0	0	0	0	0	0	0	4.3632	4.04672	0	0	4.54975	0	0	0	0	0	0.0540574	5.95861	0	5.32422	4.58503	6.51537	0	0	0	4.80688	5.27165	4.55909
hs230	5.70553	4.41794	0	0	0	0	0	0	0	0	0	5.22272	0	0	0	0	0	0	0	0	0	0	0	6.32703	0	0.106357	0	4.42366	0.166397	0	0	0	0	0	0.462444	0	0	4.34249	0	0	4.03386	0	4.31393	0	0	0	0	4.08619	4.26641
hs1137	8.7482	4.79588	0	4.5817	3.23315	0	0	0	0	0	0.0854655	0	0	0	0.783742	0	0	0	4.56703	0	0	4.1463	0	1.8591	14.4917	0	0	4.05306	4.05306	4.47756	0	3.34004	0	0	3.31102	0	0	4.09021	0	0	0	0	0	5.23433	6.01592	0	0	0.0269621	0
hs813	0	0	4.61798	0	0	0	0	0	0	4.18509	0.0423811	0	4.54516	4.25727	0	0	0	0	0	0	0	4.0722	0	0	4.38828	0	4.21112	0	0	0	0	4.45469	5.09098	4.31069	0.60845	0	0	4.02319	0	0	0	0.0937654	0	4.11295	0	0	0	0	0
hs1208	0	4.50864	0	0	0	3.0652	3.5328	0	0	0	0	0	4.3539	0	0	4.65701	7.19788	0	0	2.63684	3.52933	0	3.0449	4.39709	0	0	0	4.46924	0	4.88606	0	0	3.54706	0	1.22752	0	0	0	0	0	0	1.04743	4.03198	0	0	0	0	0	0
hs1735	4.48149	0	0	0	0	0	0	0	0	0	0.0150623	4.23433	0	0	2.72514	0	0	0	0	0	0	0	0	0	0	0	0.0641184	4.70997	8.90183	7.90065	0	0.0382848	0.0547229	0	0.638058	0	0	9.73781	0.245927	0	0.204526	0	0	0	0	2.40574	0	0.198196	0
hs1130	18.1957	0	0	0	0	0	0	0	0	0	0	0	0	0	0	0	0	0	0	0	4.03953	0	4.14448	0	1.84807	0	4.67778	12.2229	16.7974	0	2.18016	4.54547	2.02003	0	2.47426	0	0	0	0.0247033	0	0	0	0.0147957	4.08484	0	4.17587	0	0	0.0102403
mm224	0	2.55518	0	0	0	0	0	0	0.152359	0	0	2.74608	0	0	0	0	0	0	0	0	0	0	0	0	0	0	0	0	0	0	0	0	0	0	0	0.0179764	0.018909	0	0	0	0	0	0	0	0	0	0	0	0
mm102	0	0	0	0	0	0	0	0	0	0	0	0	0.0728063	0	0	0	0.0145475	0	0	0	0	0	0	0.0101946	0.0248579	0	0	0	0	0	1.36778	1.11185	0	1.46813	0.0592303	0	0	0	0.0109932	0	0.959614	0	0	0	0	0	0	0.898397	1.20999
hs1813	0	0	0	0	0.101689	0	0	0	0.0117813	0	0	5.19343	0	0	0	0	0	0	0.0130539	0	0	0	0	0	1.63967	0	0	0	0	0	0	0	0	0	0	0	0	0	0	0	0	0	1.74478	4.04407	0	0	0	1.79124	0
hs2054	5.37686	4.26104	0	0	0	8.51769	0.192425	4.44268	2.82168	5.67456	3.4051	7.4502	0	0	0	3.37072	3.42716	0.139872	0	3.93678	4.61811	0	4.32213	0.185831	0	0	3.70025	4.55255	4.86906	3.98062	0	0	0	0	0.0106127	0	0	1.38176	3.30559	0	2.24405	2.05771	0	0	0.0658617	0	1.80888	2.76495	1.78619
mm51	0	0.103596	1.22228	0.156467	0	0	0	0	0	0	0	0	4.04653	3.89414	0	0	0	2.22121	0	0	0	0	0	0	0	0	0	0	0	0	0.851875	0	1.27522	0	1.93892	0.158443	0.172927	0.185625	1.76397	0	0	0	0	0	0	0.261216	0	1.4949	0
hs1449	0	0.601134	0	0	0	0.119349	0	0	3.88459	0	0.0157333	0	0	0	0	4.20621	0	0	0	0.0871657	0	0	0	0.025589	0.439156	0	0	0	0	0	0	0	0	0	4.46092	0	0	0.195762	0	0	0	0	0	4.37882	0	0	0	0	0.0238352
mm1343	0	2.90887	1.06467	0	0.0459946	1.79853	2.57871	2.16634	2.66952	2.13874	0	0.150118	4.32627	1.21086	0	0.238641	0.242362	3.81139	0	1.27878	2.02683	0.0112967	0	5.4523	0.02995	0	0.131099	0	0	0	1.21273	1.20668	0	0	0.0100941	0	0.0303139	1.36555	0	0	0	0	0.262958	0.0169801	1.3913	3.60054	0.16111	2.43328	0
mm133	0	0	0	0	0.0187107	0	0	0	0.358791	0	0	0.238682	0	0	0.0584381	0	0	0	0	0	0	0	0	4.67904	0	0	0	0	0	0	0	0	0	0	0	0	0	1.03356	0	0	0	2.05406	0.0242323	0	0	0.0194034	0	0.0269383	0
hs514	0	0	0	0	0	0	0	0	0	0	0	0	0	0	0	0	0	0	0	0	0	0	0	0	0	0	0	0	0	0	0	0	3.96042	0	0	0	0	0	0	0	0	0	0	0	0	0	0	0	0
mm849	0	2.20233	0.189657	0	0	0	1.78723	0	2.61855	0	0	0.105727	2.9393	1.61529	0	0	0	0	0	0.125103	0	0	0	1.93304	0.448443	0	0.0164394	0	0	0	0.0165353	0.0238207	0.0114043	0	0.0289959	0	0	4.62525	0	0	0	0	0	0.167023	0	3.77182	0	1.04213	0
mm201	0	8.2301	0	0	0	0	0	0	3.46307	0	0	3.76741	3.1007	0	1.43645	0	3.98465	0	0	0	0	0	0	0.367288	0.932641	0	2.13057	0	0	0	0.828208	0	0.809801	0.742587	0.816028	0	0	0.514551	0.0716291	0	0.0667087	0	0	0	0	0	0	0	0.718611
hs1917	0.809715	0.598264	0.0846828	0	0	0	0	0	0.0149911	0	0.0658896	0	1.47604	0.208457	0	0.0881583	0.44728	0	0	0	0	0	0	0.0278072	0.0975911	0	0.0195236	0.280062	0	0	0	0.0165659	0	0.0141384	0.0113392	0	0	0.106518	0.110885	0	0	0	0	0.857452	0.0487962	0.92455	0	0.950657	0.0382716
mm62	0	0	0	0	0	0	0.019325	0.0178041	0	0	0	0	0	0	0.999174	0	0	0.0431426	0.107468	0	0	0.134056	0	2.8587	3.76055	0	0.0945599	0	0	0	0	1.38991	1.03096	0	0.0176524	0	0	0	4.40249	0	2.85798	0	4.06466	0	0	0	0	4.10095	0
hs1497	4.1336	15.7682	0	0	1.72094	0	0	0.0281381	0	0	0	0.0143479	0.491107	0.0208127	0	0	3.00524	0	0	0	0.0280894	0	0	2.49394	0	0	0	0	0	0	0	0	0	0	0	0	0	1.13013	0.0206712	0	0	0	0	0.0359459	2.85694	0	0	0.0129945	0
mm67	1.22324	0	0	0	1.52394	4.00034	4.96006	0	5.11577	3.98168	0	0	0.136847	0	0	0.921371	0	0	0	0	0.124466	0.0153526	5.03462	1.02668	0	0	0	0.976505	1.34908	0.948747	0	0	0	0	0	0	0	3.63699	4.27416	0.818935	0.780619	0.636361	4.5682	1.37348	0	0	0	0.626994	0.596366
hs845	0	8.89617	0	0	0	0	0	0	3.62768	0	0	0	0	0	0	0	0	0	0	0	0	0	0	0	0	0	0	0	0	0	0	0	0	0	0	0	0	3.99943	0	0	0	0	0	0	0	0	0	0	0
mm85	0	0	0.744149	0	2.6042	0	0	0	0	0	0	0	0	0	0	0	0	0	0	0	0	0	0	0.24817	0.0562732	0	0.178565	0	0	0	0.0902315	0.121653	0	0	0.173613	0	0	1.4877	0.010206	0	0.0384006	0	0	0.02655	0	0.114804	0	0.0768976	3.30435
mm213	0	4.08951	0	0	0	0	5.24857	0	0	0	4.2195	0	0	0	0	4.106	4.03711	3.98281	0	0	0	0	0	0	0	0	0	4.09857	5.04184	0	4.35168	4.11454	0	0	0	0	2.75236	0	0	0	0	0	0	5.08722	0	0	0	0	0
hs1451	0	0	0	0	0	0	0	0	4.21346	0	0	0.2994	0	0	0.0146811	0.102531	0	0	0	0	0	0	0	2.32438	0	0	0	0	0	0	0.0103524	0.0787424	0	0	0.0119087	0	4.36197	0.0510475	3.31967	0	4.14113	3.84813	0	0	0.021445	3.89867	3.61076	4.31816	0
hs924	0	8.13521	0	0	5.01926	0	0	0	0	0	0.19025	0.157529	8.57722	0	0	0	0	0.101003	0	0	0	0	0	0	0	0	0	0	0	0	0	0	0	0	0.0582549	0	0	10.5796	0.423305	0	0	0	0	0	4.11238	0.040365	0	8.6721	5.87561
hs1445	4.08951	4.39577	0.173504	0	0	0.217256	4.3661	0	0	0	0	0.119369	0	4.30103	0	0	3.64397	0	0	0	0.362205	0	0	0	0	0	0	0	0	0	4.27848	0	0	0	0	0	0	0.0246786	9.32243	4.11407	4.52433	4.16241	4.89146	0	0	0	4.52724	5.48545	4.39362
hs1675	0	0	0	0	0.662043	0	0	0	0	0	0	3.17503	0	0.0405849	0	0	3.05555	0	0	0	0	0	0	0.020557	0.0566403	0	0.0856274	0	0.150797	0.0129129	0	0.0331228	0.0307347	0	0.589781	0.0311344	0	0.230046	0.0211802	0	0.021551	0	0	0	0.0529173	0	0	10.3466	0
mm1349	4.86292	14.5238	2.52687	0	0.497137	0	0.0722368	0	2.50864	0	0	0	1.92928	0	0	0	0	0	0	0.0437664	0.452951	0	0	5.11725	1.55345	0.142443	0	4.38091	8.38191	4.35696	0.120206	0.0820079	0.111449	0	5.55477	0	0	0.144438	0	0	0	0	0	4.46967	0	0	0	0.0158866	0
hs2072	0	0.0330638	0	0.0806529	0	0.269357	0.305753	0	0	0	0	0.124808	0.0182266	0	0	0	0.0172788	0.279709	0	0.34358	0.33696	0	0.0116248	1.48719	0	0	0	0	0	0	0	0	0	0	0	0	0	0.125202	0.0128918	0	0	0.152826	0.0274996	0	0	0.136008	0	0.0111904	0
hs1725	0	4.0745	0	0	0	0	0	0	0	0	0	0	0.0425534	4.16679	0	0	0	0	0	0	0	0	0	8.8387	0	0	0	0	0	0	2.79626	3.53639	0	0	4.02486	0	0	1.04819	0	0	0	1.40448	0	0	0	0	0	0	0
hs819	4.01592	4.07676	0	0	0.0134158	0	4.12461	0	4.53611	0	0	0	4.78516	0	0	2.65924	0	4.5874	0	0	0	0	0	0	0	0	0	0	0	0	4.20761	9.1277	4.39362	0	9.9152	4.00922	0	6.06651	4.26922	0	0	5.01909	4.31966	3.25353	0	0	8.12396	4.56864	0
hs177	0	4.88273	0	0	0.0381376	0	0	0	0	0	0	0	0	0	0	0	0	0	0	0	0	0	0	0	0	0	0	0	0	0	0	0.0438177	0	0.044793	0.0224459	0	0	0.510406	0.0130816	0.0141244	0.0119695	0.0127132	0.0104235	0	0	0	0.0103138	0.0110736	0
hs364	5.15428	4.63639	0	0	0	0	0	0	0	0	2.10714	0	0	0	0	4.45717	4.60206	0	0	0	0	0	0	0	12.185	4.48678	0	0	0	4.36735	0.142264	0	0	0	0	0	0	0	0	0	2.30984	4.11182	0	4.02709	0	0	0	0	0
hs363	0	0	0	0	0	0	0	0	0	0	0	0	0	0	0	0	0	0	0	0	2.5867	7.12058	0	0	0	0	0	0	0	0	0	0	0	0	0	0	0	1.09413	4.03824	0	0	0	0	0	0	2.96956	0	0	4.60029
hs849	0	4.73243	0	0	5.07221	0	0	0	0	0	0	0	0	0	0	0	0	0	0	4.11238	0	0	0	0	0	0	0	0	4.97469	0	4.06651	0	0	0	6.48885	0	4.23801	4.33913	2.16058	0	4.24109	4.29243	0	0	0	4.90534	0	2.30304	0
hs362	4.11182	0	0	0	1.16852	0	0	0	0	0	0	0	0	0	0	4.02826	4.10846	4.85747	0	0	0	0	0	0	0	0	4.03245	4.46852	4.0804	4.06854	4.06609	8.15157	3.26906	0	10.3149	0	0	5.81324	0	0	0	0	2.76113	4.383	0	0.769845	0	0	0
hs922	0	4.05552	0	0	0	0	0	0	5.14352	0	0	0	0.203491	4.18776	0	0.0206073	4.5544	0	4.07265	4.14509	0	4.13077	0	0	4.07263	0	0.185329	4.22185	4.11014	0	0	0.0181857	4.00612	0	4.29557	0	0	9.25733	4.25249	0	0	0	0	0	0	0	0	4.19654	0
hs778	0	5.1986	0	0	0	0	0	0	0.503026	0	0	0	0	0	4.30715	0	0	1.59672	0	0	0	0	0	5.01233	0	4.46819	0	0	0	0	0	0	0	0	0	0	0	0	0	0	0	0	0	0	0	0	0	0	0
hs1619	0	1.14	0	0	0	0	0	0	0	0	0	0.123096	0	0	0	0	0	0	0	0	0	0	0	0.0178664	0	0.0359466	0	2.33751	0	0	0.622037	0.613363	0.544965	0	0.516729	0	0	0	0	0	0	0	0.354872	0	0	0.0725715	0	0	0.276056
mm127	0	6.03395	0	0	5.32313	0	0	0	0	0	0	0	0.0315842	0	0	0	0	0	0.149581	0	0	0	0	0	0	0	0	0	0	0	0.59852	4.39296	0.256533	0	9.00974	0	0.274258	8.6757	0.87822	0	4.93181	0.969272	0.980112	4.46218	0.138751	4.5	1.06524	1.16249	1.03365
hs2068	0	0.617674	4.10862	0	0	4.0306	5.25691	0	0.254373	0	0	0	9.40552	8.38985	0	4.62724	4.50173	0	0.033741	4.23453	0	0.0176107	0	0.0425828	0.887254	1.62169	6.82998	0	0	0	4.17539	4.98358	2.02514	0	6.92803	0	0	0	3.55203	0	2.68134	3.23461	0	0	0	4.49349	0	3.44657	5.02641
mm264	0	0.237167	0	0	0	0	0	0	0	0	0	0	3.32822	0	0	0	0	0.19081	0	0	0	0	0	0	0	0	0	0	0	0	0.778762	0.885117	0.804715	0.77574	0.73325	0	0	0	1.16171	0	0	0	0	0	1.63532	0	1.12297	3.80598	0.928375
mm438	0	0	0	0	0	0	0	3.08916	0	3.40655	0	0	2.93977	0	4.43216	0	0	0	5.06098	0	3.60715	4.20761	0	0	0	0	0	0	0	0	0	0	0	0	0	0	0	0	4.0048	0	8.17999	8.05994	0	0	0	0.071045	0	9.28182	4.24642
mm439	0	8.36929	0	0	0	0.492755	0	0	0	0.945746	0.330876	0.0561621	4.74491	0.0923308	0	0	7.39433	0	0	0.304485	0.857605	0	0	0	2.4172	0	4.21467	4.56817	4.26041	0	1.62003	1.49997	1.59264	0	0.110224	0	0	0	3.30251	0	3.21838	2.22043	4.13345	4.5266	0	0.0366403	0	0.0392082	0
hs2371	0	0	0	0	0	4.6448	4.23151	4.41909	4.26948	5.07205	0	0	0	2.11721	0	0	0	0	0.198207	0	4.66772	0.168898	0	0.0437144	0.130813	0	0	0	0	0	0.115401	0.827503	0	0	1.64263	0	0	0.0663205	0	0	0.172349	4.02189	0	0	0	0	0	0	0
mm440	0	1.20179	0	0	0.164415	0.0201686	0.0202236	0	0	0	9.23669	4.06098	0	0	0	1.52307	0	0	0	0.021163	0.0138653	0	0.0190486	4.08531	0.471306	0	0	0	0	0	0	1.62231	0	0	0.9268	0	0	5.88365	4.25304	0	4.82644	3.87752	4.31499	0	0	3.1668	4.10027	5.44799	5.86749
mm441	4.17263	4.31966	0	0	0	0	0	0	0	0	0	0	0	7.80134	0	0	0	0	0	0	0	0	0	0	3.68664	0	0	0	0	0	0	2.94181	0	0	3.04577	3.15171	0	0.511174	0	0	0	0	0	0	0	0	0	0	0
hs923	4.6073	1.56072	0	0	13.4519	0	0	0	0	0	0	0	0	0	0	0	0	0	0	0	0	0	0	0	0	0	2.91609	4.06702	0	4.03012	0	2.19848	0	0	0	2.54421	0	3.35176	4.47366	4.23958	4.17849	0	0	9.0255	0.0879081	0	0	4.09583	0
mm568	4.63799	5.1172	0	0	4.03089	0	0	0	2.24817	0	0	0.120618	3.96717	4.06493	0	0.0270289	0.0286888	0	0	0	4.00628	4.75093	0	0	0	0	0	4.82249	5.02072	5.09417	3.23753	3.57048	0	0	5.75106	0	3.06142	4.0942	0.0235438	0	0	0	0	4.15095	0.02078	1.85586	0	0.0258805	0
hs1666	0	0.0300427	0	0	0	0	2.84488	0	0	0	0.165243	0	0	0	0	0	0.540646	0	0	0	0	0	0	0.337183	0	0	0.167876	0	0	0	0.0115369	0.28364	0	0	0	0	0	0	0	0	0	0	0	0	1.90651	0.346988	0	5.33568	0
mm142	0	0.279072	0	0	0	0	0	0	4.46137	0	0	5.26082	5.88955	0	0	0	0	0	0	0	0	0	0	1.53553	0.0417769	0	0	0	0	0	0.0124333	0.105431	0.0124992	0	0.0930709	0	0	1.84474	0	0	0	1.91059	0	0	0	0.0126337	2.35241	2.3149	0
hs933	0	0	0	0	0	0	0	0	0	0	0	0	4.14813	0	0	0	0	4.4389	0	0	0	0	0	4.28382	0	0	0	0	0	0	0	0	0	0	0	0	0	4.04001	0	0	0	0	1.73461	0	0	0	0	2.1903	0
hs697	0	6.26889	0	4.29499	0	0	4.98716	0	0	0	0	0	0	0	0	0.049711	0.0489888	0	0	0	0	7.67119	0	4.57711	0	0	2.83559	4.40894	2.1657	0.641337	0	4.6139	4.40012	0	4.59491	0	0	4.41229	4.88606	4.08778	4.93554	0	0	0	0	4.15614	0	0	0
hs2066	0	0	2.62145	0	0	0	0	0	0	0	0	0	2.60977	0	0	0	0	0	0	0	0	0	0	3.85451	0	0	0	0	0	0	0.088425	0	0	0	0.0116461	0	0	0	0	0	0	0	0	0	0	1.09197	0	0	4.2296
mm1299	0	0.0636277	0	0	1.74085	0	0	0	0	3.67894	0	0	1.49464	1.12541	0	0	0	0	0	0	0	0	0	0	0	0	0	0	0	0	0	1.85221	0	0	0.0134692	0	0	2.23535	0.0811199	0	3.76907	0	0.0354603	0	0	0.0207113	0	0.0331231	4.30342
mm876	13.82	9.64535	0	0	2.02894	0	0	0	2.88518	0	0	0.407985	3.62143	1.14145	0	0	0	0	0.0595164	0	0	0.193389	0	4.17706	0	0	0	4.48017	8.61685	0	5.3619	1.33331	2.63401	0.0999375	2.21931	3.68366	2.98665	5.64315	0.526856	0	0.0908843	0	0	4.6968	0.0692732	0.983706	0	4.77632	0.0841255
hs479	0	0	0	0	0	0	0	0	0	4.00118	0	0	0	4.31695	0	4.01144	0	0	0	0	0	0	0	0	0	0	0	0	0	0	0	0	0	0	0	0	0	0	4.33766	0	4.28593	5.63349	3.99192	0	0	0	0	0	4.6121
hs627	7.74958	14.6284	0	0	0	0	0	0	0	0	0	4.37675	0	0	0	0	0	0	0	0	0	0	0	0	4.94692	0	0	9.29692	9.35144	8.91849	1.70455	7.09774	4.74834	0	5.84084	0	0	0	0	0	0	0	0	6.32239	0	0	0	0	3.97913
hs2162	0	4.07334	0	0	0	3.29441	3.92833	0	0	0	4.00845	0.195974	0	4.31781	0	0	0	0	0	0	4.43407	3.74151	0	0.967807	4.40511	0	0	0	0	0	0.12126	1.49675	0	0	4.39573	0	0	3.23514	4.33248	0	0.620941	0	0	0	0	0.0138811	1.52074	2.15236	0.712164
hs1769	0	3.97646	0.0117054	0	0	0	0	0	0	4.06317	0	0.0299817	0	3.97328	0	0	3.7232	0.81968	0	4.13563	0	0	4.20301	0	0.0233607	0	0	0	0.0283292	0	5.71515	6.81411	4.44098	0	5.04695	0	0	9.94466	4.39233	0	3.59944	4.03798	5.64027	2.72866	0	0	4.18208	7.02466	4.89782
hs2218	4.59332	5.18977	4.16729	0	0.219473	0	0	0	4.3864	0	4.10292	0.343612	8.70529	4.38553	0	3.94602	0	1.55484	4.41454	0	0.880147	0.977241	0	3.30466	2.22554	0	4.0348	4.2826	4.60031	4.45976	4.85348	6.88858	4.51638	0	5.37228	0	0	5.11302	0.142189	0.02194	4.09486	0	4.58871	4.69037	4.16304	16.4031	0	4.1503	0
mm1323	0.0312128	8.77069	3.97877	0	0	6.16983	4.95388	6.43348	0	5.98947	0	5.65743	7.77234	0	0	0	0	0	0	4.83532	5.77684	0	4.99677	5.08618	6.49069	0.188653	0.0171744	0	0	0	0.123831	0.175001	0.141314	0	0.419976	0.129214	3.57392	9.00427	2.01646	0	3.0524	0	4.6692	0.0767529	0.530483	4.69151	4.08209	11.4055	4.15698
hs730	4.59688	12.3958	0	0	0	0	0	0	0	0	5.17914	0	3.36077	0	0	0	0	0	0	0	0	0	0	0	6.48041	0	0	4.46852	4.0804	0	4.10064	7.65048	0	4.15987	4.67042	8.96012	4.46675	0	2.63138	0	2.87596	3.90032	0	4.50724	0	0	0	3.68527	0
hs729	0.102348	0.893281	7.26381	0	0	0	4.01503	4.00397	0	0	0	0	0.279259	0	0	0	0	0	0	4.11764	0	0	0	0	1.69319	0	0	4.56225	4.87943	0.0660995	0	3.75604	0	0	4.01864	0	0	0.0410032	4.40375	3.99181	0	4.19001	4.69725	0.0946563	0	0	4.71771	9.10968	4.92975
hs731	0	1.19388	0	0	0	0	4.66505	0	0	0	0	0	0.228621	4.23076	4.36465	0	0	0	0	0	0	0	0	1.73389	0	0	0	0	0	0	0	0	0	0	0	0	0	0	8.39216	4.34294	4.3243	4.69465	4.5157	0	0	0	4.05012	4.42946	0
hs1855	0	0	0.0245405	0	0	0	0	0	0	0	0	0	0	0	0	0	0	0	0	0	0	0	0	0	0	0	0	0	0	0	0	0.348213	2.29445	0	0.0121441	0.449518	0	0	0	0	0.793021	0	0	0	0	0	0	0.11423	0
hs1693	0	0.0537785	0	0	0	0	0	0	1.80841	0	0.0817772	4.38405	0.0328009	0.0452	0	0	0	0.0193014	0	0	0	4.04171	0	0	0	0	0	0	0	0	0	0	0	0	0.150736	0	0	0.196662	0.354502	0	0.432729	0.458329	0	0	0	0	0.443902	4.57098	0.464536
mm1384	0	4.83034	1.35106	0	2.14017	0	3.10901	0	0	0	0	0.169853	0.470687	4.2193	0	2.24033	1.93104	0.0657001	0.236246	1.02656	1.61743	1.89999	0	2.55876	0.307774	0	0.15013	0.336001	0	0	0	0	0	0	0.17358	0	0	4.42835	4.48713	4.03979	0.929924	4.42817	4.33697	0	0	0	4.221	4.331	4.17294
hs2033	0	0	0	0	0	0	0.0286453	0	0	0	0	0	0	0.0130147	0	0.0354949	0	0	0	0	0	0	0	0	0	0	0	0	0	0	0.23388	0.229212	0	0	0	0	0	0.114551	0	0	0	0.381823	0	0	0.0100848	0	0	0	0
hs1856	0	0	0.0509202	0	0	0	4.03251	0	0.374166	3.22298	0	0.10115	0	0	0	0	0.0384899	0.994643	0	0	0	0	0	4.04132	0.0925358	0	0.0167823	0	0	0	1.03735	0	5.17456	0	0.0121423	8.30517	3.40367	4.27247	7.73129	0	2.43852	3.65888	0	0.0697475	0	0	0	8.38963	4.01233
mm1348	0	3.49086	0	0	0.0214553	0.0255514	0.172091	0	0.0187327	0.18963	0	0.0241297	0	0	0	0	0	0	0	2.46232	0.196675	0	0.181069	0	0	0	0	0	0	0	0.0807242	0.0348185	0	0	0.126709	0	0	1.33621	0.0252081	0	0	0	0	1.2645	0	0	0	1.77177	1.82291
hs1517	0	2.54272	0	0	0	0	0.516714	0	0.0381681	0	0	0.0261352	0.0167345	0	0	0	0	0	0	3.99656	0	2.4874	0	0.0585963	0.279832	0	0.245235	0.0137572	0	0	3.59154	0	0	0	0	0	0	0.0234565	0	0	0.143691	0.0223861	0	0.0127566	0	0	0	0	0
mm627	0	0	0	0	0	0	0	0	0	0	0.063653	0	0	4.38405	0	0	0	2.12992	0	0	0	0	0	4.50818	0.0112382	0	0	0	0	0	5.05629	0	0	0	1.47876	0	4.40371	4.11811	5.88972	0	1.89122	1.71231	1.9891	0	0	4.37705	0	1.77347	0
mm628	0	4.50307	0	0	0	0	0	0	0	0	0	1.7559	0	0	4.29614	0	0	4.37986	0	0.0216408	0	0	0	0	0	0	0	3.96635	0	0	0	3.73552	0	0	3.54148	0	0	4.69841	4.02319	0	0	0	0	0	0	0	0	0	0
mm629	0	0	0	0	0	0	0	0	0	0	0	0	0	0	0	0	0	0	0	0	0	0	0	0	0	0	0	0	0	0	0	0	0	0	0	0	0	0.122818	3.96277	0	0.124667	0	0	0	0	0	0	0	0
mm630	0	4.13077	0	0	3.04158	4.5503	0	0	0	0	2.55636	4.54363	0	3.66849	0	0	0	0	4.45593	0	0	4.17893	4.04245	7.85062	0	0	10.5214	0.0169195	0.0169195	0	4.25938	4.31732	3.68637	0	3.29183	2.88958	0	4.39095	0	0	0	0	0	0	0	4.37263	0	2.94258	0
mm631	0	0	0.104126	0	0	0	0	0	0.0252532	0	0	0.0113639	4.15721	0	0	0	0	0	0	0	0	0	0	0	0	0	0	0	0	0	0	0	0	0	0	0	0	2.30006	0	0	0	0	0	0	0	0.105596	0	0	0
mm632	0	0	0	0	4.77425	0	0	0	0	4.21365	0	0.065101	0	0	0	4.63617	4.74091	0	4.29158	0	0	0	0	0	0	0	0	0	0	0	0	3.17396	4.24792	4.03245	0.0130577	0	0	4.40101	0	0	0	0.0698185	0	0	0	0	0	0	0.113124
hs1467	0	0	0	0	3.36841	0	0	0	0.0124608	0	4.49621	0.0609171	0	0	0	0	0	0	0	0	0	0	0	4.25181	0	0	0	0	0	0	0	4.04287	0	0	4.6882	2.83855	0	3.15001	3.8279	0	0	4.40762	0	0	0	3.399	0	4.80688	0
mm633	0	5.00486	2.00815	0	0	0	0	0	0.0777097	0	0	0.291643	4.77802	3.85645	0	0	0	0	0	0	0	0	0	4.25055	0	0	0	0	0	0	0.394316	0.625526	0.224214	0	3.59884	0.0131657	4.15001	1.93302	4.43759	0	0.0331671	0	0	0	0	3.58495	0	0.0307734	0
hs1489	0	0	0	0	3.10808	0	0	0	0	0	0	0	0	0	0	0	0	0	0	0.355269	0	0	0	3.34137	0	0	0.10449	0	0	0	0.0366395	0	0	0	0	0	0	2.73431	0	0	0	0	4.12674	0	0.0472975	0.0100944	0	5.00222	4.27896
mm634	5.42248	0.462856	0	0	0	0	0	0	0	0	0	0.0630251	4.03012	0	0	0	0.394706	0	0	0	0	0	0	0	0	0	0.794288	0	8.88381	0	0	0	0	0	0	0	0	0	0.315498	0	0	0	0	4.49909	0	0	0	3.27682	0
mm1285	0.367478	4.03724	0	0	0	0	0	0	0	0	4.45005	0.0469553	0.200071	0	0	0	0	0	0.593076	0	0	0	0	0	0.606779	0	0	0	0.590452	0.155121	0	4.06221	0	0	4.70115	0	0.390825	0.04614	3.0247	2.59542	2.69248	0	3.25103	0.415088	0	0.155354	0	2.92623	2.93003
mm635	0	0	0	0	0	0	0	0	0	0	0	0	0	0	0	0	0	0	0	0	0	0	0	0.0231228	0.0721921	0.0155139	0	0.0685982	0.130055	0	0	0	0	0	0	0	0	0	0	0	0	0	0	0.173799	0	0	0	0	0
mm636	17.2925	18.195	0.0459091	0	0	0	0	0	0	0	0	0	0	0.0443301	0	0	0	0	0	0	0	0	0	4.22085	0	0	0	4.46852	8.43106	0	0	2.50896	0	0	2.17964	0	0	0.018052	0	0	2.34685	0	0	4.77728	0	0.0240614	0	0	0
hs2375	0	0	0	0	0	0	0	0	4.40117	0	0	0	0	0	0	0	0	0	0	0	0	0	0	0	0	0	0	0	0	0	0	0	0	0	0	0	0	3.97436	0	0	0	0	0	0	0	0	0	0	0
hs2241	1.3373	1.35323	0.03436	0	0	0	0	0	0.0350634	0	1.16607	0	0.058972	0	0.0713734	0	0	0	0	0	0	0	0	0.160262	1.10753	0	0	0	0	0	0.0325522	0.0588236	0.0303084	0	0.0252106	0	0	0.171185	0.0103076	0	1.28996	0	0	1.39045	0	0	0	0.0163773	0.0334311
hs2023	0	0	0	0	3.06409	0	0	0	0	0	0	0	0	0	0	0	0	0	0	0	0	0	0	0	0	0	0	0	0	0	0	0	0	0	2.90994	0	0	0.0320773	3.21199	0	3.48513	0	0	0	0	0	0	4.05934	0
mm339	0	0	0	0	0	0	0	0	4.99338	0	0	0	0.270287	0.0118433	0	0	0	0	0	0	0	0	0	0.941196	0.0712232	0	0	0	0	0	0	0	0	0	0.0517993	0	0	0.0558773	0.506207	0.213219	0.180847	0.181175	0.17596	0	0	0.0741273	0	0.430278	0
mm1309	2.79912	0.370096	0	0	0.0467957	0.0381287	0.0327321	0.035947	0.0401723	0.0368174	0.196657	2.23873	3.39235	0.0829618	0	2.57548	1.31581	0.67826	1.36632	0	0.0336795	0	0	1.94653	0	1.23908	0	0	0	0	0.0710617	0.339904	1.46629	0	1.69277	0.0202643	0	1.03076	2.18274	0.0214978	6.66256	2.37685	0	0.041626	2.41977	3.66484	2.07795	4.02458	1.96372
mm780	0	0	0	0	0	0	0	0	0	0	0.577231	0	0.55526	0	0	0	0.0312857	0	0	0	0	0.126782	0	0.251784	0.5614	0	0.0859035	0	0	0	0.540322	0.500855	0.454025	0.470062	0.517762	0.575567	0.891136	0.0923494	0	0	0	0	0	0.248918	0.258895	0.984288	0	0.0215383	0.0249145
mm1338	0.0818403	4.80174	0	0	0.0118439	0	0	0	0	0	0	0	0.0207789	0.0831191	0	0	0	0	0	0	0	0	0	0.0124913	0	0	0	0.0828379	0.0229522	0	0	0	0.0798804	0	0.0523633	0	0	1.80835	3.88256	1.04388	3.1703	3.57415	1.00336	0.0109445	0.44839	0.0120187	3.73693	4.28256	3.66594
hs2384	0	0	0	0	0	0	0	0	3.72535	3.13119	0.479145	0	0	0	0	0	0	0	0.196906	0	0	0	0	0	0	0	0	0	0	0	4.19331	0	0	0	0	0	0	0.0203471	6.10051	0	3.99302	7.08657	6.68311	0	0.356193	0	6.40188	6.21634	5.99432
hs1273	0	0	0	0	4.85879	4.97062	8.18895	4.81816	0	5.51004	0	0	0	5.09691	0	0	0	0	0	0	4.43415	0	5.07212	4.01952	0	0	4.14267	4.70997	4.40894	4.70997	0	0	0	0	0.701668	2.03619	3.00263	6.95363	4.19997	0	4.34008	4.48122	0	0	0	0.888796	0	4.67985	4.21681
hs1276	0	0	0	0	0	0	0	0	0	0	0	0	0	0	0	4.40012	5.67162	0	0	0	0	0	0	3.62008	0	0	0	4.34886	4.06783	0.0738198	4.03972	0	0	0	0	0	0	0.0808237	4.60356	0	8.0287	4.06702	0	0	0	0	0	4.42446	0
hs1290	0	4.67964	0	0	0	0	0	0	0	0	0.49409	0	0	0	0	0	0	0	0	0	0	0	0	0.101459	0	0	0	4.70997	4.40894	4.70997	8.28643	0	0	0	2.4127	4.04335	0	0.324714	0.0220341	0	0	0	0.0165727	0	0	0	0	0	0
mm103	0	0.19616	0	0.0615509	0	0	0	0	0	0	0	0	0	0	0	0	0	0	0.0602366	0	0	0	0	0	0	0	0.0811309	0	0	0	0	0.0638616	0	0	0.0127097	0	0	0	0.0675924	0	0.0679496	0	0	0	0	0	0	0	0
mm1310	5.18046	5.45223	0.255212	0	0	0	0	0	0	0	4.0615	4.39121	0.0552638	0	0	0	0.01862	0	0	0	0	4.08273	0	0	0	0	0	4.74074	4.44043	4.74074	0.20521	0	0	0	0.0122162	0	0	0.923742	4.40121	0.819225	1.21112	0	4.25964	6.62182	0	0	0	4.44456	0.925728
hs1527	0.32296	0	0	0	0	0.0350785	0	0	0	0.0293562	0	0	4.6816	1.64712	0.977773	0.0393119	0	0	0	0.0392193	0	0	0.0258549	0	0	0	4.18975	0.0264718	0	0	4.02067	2.02368	4.40879	0	4.15964	4.49903	0.339591	0	4.3035	0.0127731	4.02377	0	0	1.93616	0	0	0	5.33325	4.01799
hs388	0	4.05012	0	0	2.93223	4.0804	8.82681	4.19928	5.16941	0	0	0	5.83762	0	0	2.97074	7.23156	0	0	4.28316	0	0	0	4.24795	0	0	0	0	4.47237	0	0	0.0753024	0	0	1.83406	0	0	0	4.49485	0	4.65561	0	4.28233	4.13018	0	3.2914	0	0	0
hs2015	0	0	0	0	0	0	0	0	0	0	0	0	0	0	0	0	0.0508405	0	0	0	0	0	0	0	0	0	0	0	0	0	0	0	0	0	0	0	0	0	0	0	0	0	0.0194923	0	0	0.0114917	0	0	0
hs1496	4.91185	4.44249	0	0	0.0376141	0	0	0	8.34899	0	0	0.476756	2.32349	0	0	0	0	0.106228	0	0	0	1.83053	4.12726	4.22446	9.36132	0	0	0	1.64142	4.46092	8.68837	0.0316815	4.05898	0	8.33949	0.718944	0.718858	4.27654	3.84596	0	0	0	0	0	1.78733	0.0400631	0	4.63731	0
hs1385	4.25452	0.520639	0.0305487	0	0	0	0	0	0	0	0.0403471	0.0457349	0.0263203	1.09202	0.0173967	0	0	0	0	0	0	0	0	0.429493	0	0	0.231571	0	0	0	0	0	0	0	1.07061	0	0	0	0	0	0	0	0	4.25845	0	0	0	0	0.050926
hs2081	0	0	0	0	0	0	0	0	0.181132	0	0	0.0596946	0.199427	0.444477	0	0	0.189207	0	0	0	0	0	0	0.0215399	0	0	0.0824748	0	0	0	0	0.477947	0.290206	0	0	0.0203442	0	0.0565217	0	0	0	0	0	0	0.165611	0	0	0	0
hs1878	0	0	0	0	0.0119541	0	0	0	0.0711644	0	0	0	0	0.0553509	0.0600988	0	0	0	0	0	4.02824	5.06023	0	0	1.47611	0	0	0	0	0	0.088223	0	0.0826557	0	0	0.0869376	0.0527128	0.0922676	0	0	0	0	0	0	3.93491	0.0127554	0	8.68683	0
hs1880	8.39527	4.36244	2.53491	0	0.0823468	0	0	0	0	0	0.13668	0	2.53442	0	4.39903	0.0346605	0	4.82637	5.31966	0	0	0	0	0.474053	0	0	1.45426	4.12051	4.12051	0.0504444	0.692968	5.38761	1.79768	0	5.08816	0	0	1.84817	3.66231	0	0	0	0	0	1.01044	0	0	3.60005	4.50025
hs644	12.9129	4.57349	0	0	0	0	4.09044	4.10329	0	0	0	5.05698	8.17767	0	0	0	0	5.33724	0	4.28435	0	0	0	0	4.26288	0	0	5.03041	8.35518	0	8.59437	4.12668	0	0	4.44454	0	0	8.55035	0	0	0	0	0	0	0	0	0	4.86012	0
hs2307	4.60906	0	0	0	0	0	0	0	0	0	0	0	0	0	3.52204	0	0	4.50585	0	0	0	0	0	0	0	0	4.05799	4.72354	4.69465	4.72354	0	0	0.193406	0	0	0	0	8.99098	4.42878	0	8.97683	0	0	8.82991	0	0	0	13.4256	3.99934
hs2306	4.49475	4.26073	0	0	0	0	0	0	0	0	4.51999	8.46063	5.00772	8.88363	1.70657	4.48017	4.64397	0	0	0	0	0	0	0	0	0	8.35047	4.70997	4.73755	8.9696	4.38195	0	4.09098	4.29158	0.619708	5.02228	4.1707	4.4878	4.36957	0	0	0	4.64589	0	0	0	4.4828	8.62277	13.601
hs1740	0	3.67716	4.33642	0	0	0	5.1343	0	0	0	0	0	0	0	0	0	0	4.37779	4.05257	0	0	4.16334	6.69626	9.06931	4.42345	0	0	4.40561	3.46617	4.66334	0.162268	4.19246	0.17352	0	4.43679	0	0	0	0	0	0	0	0	0	0	0	0	0	5.39254
hs816	0	0	0	0	4.43223	0	0.167372	0	0	0	0.231269	5.18977	0	0	0	0	4.68194	0	0	0	0	0	0	4.66154	0	0	0.0111311	4.27246	4.26922	0	0	0	0	0	4.19111	4.08725	8.61996	4.88606	0	0	0	0	0	0	1.7709	0	0	4.24033	0
hs550	5.51999	0	0	0	0	0	0	0	0	0	0.276617	0	0	0	0	0	0	0	0	0	0	0	0	4.44009	4.05899	0	0	4.22988	8.64574	4.40121	8.55063	4.08831	0	0	4.25885	0	0	8.99353	4.05466	0	0	0	0	0	0	0	0	0	0
hs749	0	4.06248	0	0	4.29243	0	0	0	4.04866	0	0	0	0	4.07779	0	0	4.13608	0	0	0	0	0	0	6.07956	4.22328	0	0	0	0	0	0	0	0	0	0	0	0	9.32445	4.67572	0	4.13253	4.40561	0	0	0	0	0	5.09963	5.03858
mm16	0.0209558	0	0	0	0.015138	0	0	0	0	0	0.052557	0	0.162804	0	0	0	0	0	0	0	0	0.0221902	0	0	0.0280739	0	0.0934507	0	0	0	0.0169343	0.0226198	0	0	0.029464	0	0.0529573	0.146431	0.144772	0	0.0136695	0.198122	0	0	0	1.15254	0	0.437149	0
hs428	4.9393	1.94836	0	0	4.46092	0	4.49349	0	0	0	1.5356	0	0	4.15739	0	0.0211404	0.0203391	0	0	0	0	0	0	0	4.27084	0	1.89627	10.0425	8.961	4.59346	0	0	0	0	0	0	0	0	2.40037	0	0	0	3.50292	4.10791	0	0	0	0	0
hs1127	0	0.0732603	0	0	0	0	0.441885	0	0	0	0.104939	0	0	0.180782	0	0	0	0	0	0	0	0	0	0.0126117	0	0	5.87111	0	4.05479	0	0	0	0.0176613	0	0	0	0.0339746	0.0192633	0	0	0	0	0	4.17849	1.47488	3.86214	0	0	4.19336
hs736	0	0	0	0	0	0	0	0	4.49853	0	0	0	0	0	0	0	0	0	0	0	0	0	0	0	0	0	0	0	0	0	0	0	0	0	0	0	0	8.33121	0	0	0	0	4.22257	0	0	0	0	0	0
hs1075	9.28691	4.18709	0	0	0	0	0	0	0	0	4.12445	0	0	0.644438	0	0	0	0	0	0	0.0404857	0.0337065	0	4.36609	0	0	0	4.4168	5.97062	4.24109	4.67745	3.98715	4.63794	0	6.62192	0	0	4.08181	4.69465	0	4.23508	4.05012	4.11805	4.58917	4.7986	4.0109	4.17718	4.53611	5.40188
hs604	0	0	0	0	0	0	0	0	0	0	0	0	0	0	0	0	0	4.92082	0	0	0	4.5588	0	4.39147	0	0	4.05502	0	4.40328	4.16011	0	0	0	0	4.02394	0	0	9.06937	4.93702	0	4.48945	9.06866	0	0	4.04177	0	0	5.46506	4.63264
hs1064	8.90905	4.02457	0	0	0	0	0	0	0	0	4.51286	0	0	0	0	0	0	0.905984	0	0	0	0	0	8.37535	0	0	0	9.06893	4.70878	4.70642	1.30872	3.78452	1.97727	1.51192	5.78552	0	4.35952	3.97289	0	0	0	0	0	0	0	1.26674	0	1.5102	1.66599
hs539	0	0	0	0	4.20273	0	0	0	0	0	0	0	0.966005	0	0	0	0	0	0	0	0	0	0	9.68832	0	0	0	0	0	0	0	0	0	0	0	0	0	0	8.15294	0	8.21978	0	4.23582	0	4.1986	0	0	9.06349	4.75696
hs944	0	0	0	0	8.94665	0	0	0	4.04576	0	0	1.15333	0	0	0	0	0	0	0	0	0	0	0	0	4.57675	0	0	0	0	0	4.34104	0	0	0	0	0.41482	0	0	0	0	0	0	4.31876	0	4.56481	0	0	0	0
hs566	4.13822	0	4.12494	0	0	0	0	0	4.27084	0	5.25571	4.13194	4.8041	4.4023	0	0	0	0	0	0	4.13609	0	0	0	0	0	4.08355	0	4.05277	0	4.55596	4.07988	4.16714	0	0	0	0	5.25727	0.434073	0	4.27819	8.13927	0	4.55752	0	0	0	0	0
hs1539	4.55909	0.408492	1.417	1.33341	5.91243	0	0	0	4.92615	4.1167	0	3.6741	0.0134297	4.21145	0	0	0	0	0	0	0	0	0	5.37059	6.23807	0	0	4.26281	8.58748	4.13227	0	0	0	0	0.0645201	0	0.0407779	3.46602	0	0	0	0	4.37675	4.44977	0	0	0	5.1269	0
hs1168	0	0	0	0	7.34568	4.14412	4.44558	4.26849	0	4.16766	0	0	4.73995	13.6911	0	0	0	0	0	4.24152	4.15554	4.13727	7.49403	4.32769	0	0	0	0	0	0	10.0702	10.0585	8.87372	4.10678	10.2128	9.04441	4.15992	6.42074	0	0	0	0	0	0	0	4.25018	0	4.21586	0
hs1523	8.54044	0	0	0	0	0	0	0	0	0	0	4.87943	4.28825	4.68403	4.57187	0	0.909757	0.180723	4.05933	4.41454	0	0	0	4.20901	0	0	0	12.8035	13.1149	5.09044	8.88959	4.22685	8.42966	0	8.83793	4.64207	0	0	4.9393	0	4.00305	0	8.48965	0	4.34008	4.20761	0	10.2412	0
hs1193	4.04967	0	0	0	0	0	0	0	5.03098	4.05208	0	4.1264	0	0	0	0	0	0	0	0	0	0	4.38405	0	0	0	0	0	0	0	0.0362889	0.0395669	0.102686	0	0.103737	0	0	4.05849	0	0	0	0	0	0	0	0	0	0	0
hs1201	0	0	0	4.5817	0	0	0	0	3.51431	4.43063	0	0	0	4.15739	0	0	0	0	8.17226	0	0	0	0	0	0.0528159	0	0	0	0	0	0	0	0	0	0	0	0	4.47777	4.83863	0	4.85387	0	4.50307	0	0	4.38627	4.4828	13.6255	4.28904
hs598	4.02457	0	0	5.21112	0	0	0	0	0	0	0	0	4.24033	4.05799	0	0	4.05948	2.77327	5	0	0	0	0	4.13136	0	0	1.66757	0	0	0	3.01219	0	2.28138	2.9838	2.22397	1.98872	0	8.70631	4.31426	0	0	0	0	0	4.0575	0	0	4.28067	0
hs1062	0	0.0371249	1.58778	0	0.0547591	0.0667468	0.0724385	0	4.08275	0	0	0	0	0	0	0	0	0	0	0.0790465	0	4.92812	0	4.21015	0.0253967	0	0	0	0	8.27098	5.43051	5.89895	4.98444	0	11.3187	0	9.34874	12.9882	0	0	0	0	0	0	0	0	0	0	5.37395
hs555	0	0	0	0	4.05948	0	0	0	0	0	0	0	0	4.05404	4.64782	0	0	4.67543	0	0	0	0	0	3.27564	0	0	0	0	0	0	3.03351	3.63358	0	0	0.0168946	0	0	0	0.0217693	0	4.35164	0	0.0166627	0	0	4.15991	0	1.83314	4.28819
hs343	0	0	0	0	0	1.21914	0	0	0	1.37829	0	0	0	0	4.23359	0	4.4045	8.12505	0	0	1.36412	0	0	4.20551	0	0	0	0	0	0	8.19995	0.760556	7.4799	0	4.62461	0	4.56308	3.50982	4.2283	0	0	4.27151	0	0	0	0	0	4.70272	0
hs433	5.10568	0	0	0	4.11737	2.53211	1.84161	0	0.0196906	2.3982	0	4.09691	0	4.07779	0	0	4.065	0	0	1.83368	2.19384	0	0	4.82815	0.0524459	0	0	4.48812	4.22988	4.64207	12.4834	4.01233	4.32514	0	8.69166	4.03716	0	12.8629	0	0	0	0	4.11182	8.92741	0	4.13131	3.86236	4.08426	3.76774
hs791	0	4.46597	0	0	0	0	0	0	2.39137	0	2.90169	0	2.42186	4.01035	0	0	0	0.37208	0	0	0	0	3.99297	4.07832	0	0	0	2.62379	4.44585	0	4.07776	0	0.606575	0	0	0	0	5.04144	4.0147	0	0	0	0	0	0	0	0	8.19334	0
mm292	0	0	0	0	0	0	0	0	0.0240963	0	0	0	0	0	0	0	0	0	0	0	0	0	0.0356392	0.0345177	0	0	0.056062	0	0	0	0	0	0	0	0	0	0	0	0.0507457	0	0.0456246	0	0	0	0	0	0	0	0.0136139
hs1647	0	0	0	0	4.48783	0	5.11255	4.06774	2.50041	0.0313665	0	2.72515	0.180026	0	0	0	0.153627	0	0.155433	0	0	0	0	12.1389	0.414075	0.0155139	0	0	0	0	0.194651	0.0116713	0	0	3.76403	0	0.037401	6.99819	0.0941076	0	0.11369	0.0113116	0	0	0	2.05234	0	0.0117106	0.0856164
hs527	9.22093	0	0	0	0	0	0.0335137	0	0	0	0	0	0	0	0	0.0352073	0.0366879	0	0	0	0	0	0	1.48054	2.33629	0	0	8.95409	8.51351	4.55909	0	4.53982	0.435986	0	0.67264	0	0	1.73666	0.532734	0	1.36974	0.430151	0	8.61932	0.017819	0	0.032301	2.27415	0.487007
mm701	0	4.22257	0	4.01802	0	4.95861	5.05159	4.44249	0	4.80967	0	1.77435	0	0	0.24914	0	0	0	0	4.8962	4.82974	0	4.43533	4.34582	0	0	4.39903	0.0291138	0	0	4.02795	4.01233	0	0	5.0455	0	0	3.79085	4.82102	0	4.00922	4.62525	0	8.30759	0	0.352436	0	5.76955	5.19518
hs345	4.18278	5.21753	0	0	0	0	0	0	3.38023	0	0	0	0	0	0	0	4.43533	0	0	0	0	0	4.20273	0	0	0	0	0	0	0	0	0	0	0	0	0	2.10965	8.72658	0.268621	0	0	0	0.0143308	5.18427	0	0	0	0.283611	0
mm1188	2.50843	0.112245	0	0	0	0	0	0	0.0179078	0	0	4.54061	0	0	0	0	4.51856	0	0	0	0	0	0	4.41229	0.228208	0	4.15035	4.29888	5.80414	0	0	0.0628294	0	0	0.1537	0	0	0.0280599	0.819125	0	0	0.677473	0.0151333	1.98163	0.167623	2.23472	0.790677	0.803613	0.774991
hs346	4.32975	5.72584	0	0	0	0	0	0	2.38094	0	0	0	0	4.14663	0	0	0	0	0	0	0	0	0	0	0	0	0	0	0	0	0	0	0	0	0	0	4.20761	10.001	0	0	0	0	0	0	0	0	0	0	0
hs347	4.76447	5.0655	0	0	0	0	4.30612	0	0	0	0	0	0	0	0	0	0	4.4045	2.31868	0	0	0	0	0	0	0	0	0	0	0	0	4.19382	0	0	4.33255	0	0	4.58004	0	0	0	0	0	4.47496	0	0	0	0	4.0511
hs1676	0.0343531	2.34825	0	0	0	0	0	0	0	0	0	2.04059	0.0807243	0	0	0	0	0	0	0	0	0	0	3.98496	0	0	0.883477	0	0.0364103	0	0	0	0	0	0	0	0	5.09982	0.987387	0	4.31368	0	0	0.0602116	0	3.24504	0	4.17994	0
mm506	4.78873	3.73602	0	0	0.0193296	2.33766	8.06915	2.27374	0	2.41918	0	0	7.96494	0	0	0	0	0.111632	0	0	2.30614	0	1.55091	3.26586	4.09423	0	2.91041	0	0	0	0.0674266	0.121244	0.307491	0	0.0567825	0	0	0.475416	0	0	0	0	0	4.41879	0.743069	0	0	0.469816	0
hs348	0	0	0	0	0	0	4.79317	0	0.423598	0	0	0	0	0	4.84164	0	0	0	0	0	0	0	0	0	2.06812	0	0	0	0	0	4.12552	12.0556	4.61618	0	7.80166	4.93181	4.1463	4.07883	4.5376	4.4908	5.28645	4.03433	0	0	0	0	0	4.35262	0
hs349	0	0	4.35754	0	0	0	5.5867	0	4.72125	0	0	0	0	0	0	4.2636	9.11715	0	0	0	0	0	0	4.12033	0	0	0	0	0	0	0	0	0	0	0	0	0	4.00612	4.02826	0	0	0	0	0	4.67985	0	0	0	4.25181
hs350	0	8.05102	0	0	0	0	0	0	0	0	0	0	4.18111	4.15323	4.40392	0	0	0	0	0	0	0	4.31003	1.29933	0	0	0	4.05306	5.03292	4.16115	4.90309	0	0.6245	0	4.16219	4.44491	0	0	2.21928	0.0351549	0.102214	0.217226	0.0205243	0	0.0208471	0	0	3.82977	4.09281
hs592	0	0	0	0	0	0	0	0	4.54462	0	0	4.74715	0	0	0	0.0164123	0	4.15614	0	0	0	0	0	8.49088	0	0	0	5.15366	5.30715	0	0	0	0	0	0	0	4.15243	5.22901	0.0202068	0	0	0	0	0	0	0	0	0	0
hs879	0	0	0	0	0	0	0	0	4.13966	0	0	0	0	4.05333	0	0	0	0	0	4.03198	0	0	0	4.14669	0	0	0	0	4.7986	4.32239	10.9375	10.6584	8.23717	0	4.07109	9.07678	4.82681	4.3439	9.24529	0	5.92445	4.09558	8.94316	0	0	0.0349861	0	0	4.1107
hs984	4.17198	4.05899	0	0	5.6558	0	8.01797	2.61133	4.60863	0	0	0	4.51145	8.97417	0	0	4.11049	0	0	0	0	0	0	4.3081	5.21938	0	0	4.13136	0	0	4.69553	0	0	4.71781	0	0	0	0	0	0	0	0	0	4.03386	4.09909	0	0	3.20064	0.0275265
hs1538	0	0.611838	0	0	3.33339	0.549288	0.510225	0.181123	3.96382	0	0	0	4.18111	8.80834	0	0	4.53165	0.0205827	0	0.552415	0.193227	4.81991	0	3.56295	4.25414	0	8.7438	5.39686	4.40894	4.70997	10.9631	5.62342	4.00511	0	11.9073	0	4.11656	4.15677	0	0	0	0.0422611	4.18077	0	0	0	0	4.13963	9.13082
hs704	12.5389	0	4.08249	0	7.04742	0	0	0	4.21467	0	4.23003	4.11691	0.0569506	0	4.08092	0	0	0	0	0	0	0	0	3.94734	0	0	9.63773	8.6366	9.6015	6.10073	6.45842	5.82974	5.80134	0	5.54212	4.82391	0	4.84738	0.388703	0	0.401565	0	0	9.09583	0	5.53271	0	0	0
hs1166	0	0	0	0	0	0	0	0	0	0	4.37263	3.48019	0	0	0	4.44009	0	4.33161	0	0	0	0	0	0	0	0	4.33913	4.42366	0	0	0	0	0	0	0	0	0	0	0	0	0	0	0	0	4.20901	4.01233	0	0.049686	0.0298931
hs593	0	0	0	0	0	0	4.41005	0	4.01011	0	0	0	4.96658	0	0	4.07058	4.09583	0	4.05948	0	0	0	0	0	0	0	4.26841	0	0	0	0	0	4.15945	0	4.41118	0	0	4.13136	4.39254	0	0	4.54975	9.23986	0	0	4.10182	4.53611	5.75696	4.35164
mm795	0.0743797	2.15955	0	0	0.0212076	0	0	0	0	0	0	0	0.18005	0	0	0	0	2.19495	0	0	0	0	0	0	1.24042	0	0	0	0	0	0	0	0	0	0	0.0201219	0	0	0.269629	0	1.52717	0	0	0	0	0	0	3.62902	0.42276
hs1602	8.43347	7.07514	0	0.106256	0.0418045	0	0	0	0	0	0.515851	0	5.06646	0	0	0	0	0.0104867	0	0	0	0.0853108	0	0.15783	4.50585	0	0	4.1798	4.12784	4.45469	2.98317	2.76849	0.01441	0	0.0684992	0	0	0.0933213	4.08249	4.11407	4.24074	4.40012	0	4.04721	0	1.00375	0	3.71351	0
hs1474	0	0.132676	0.28848	0	4.75449	7.82115	7.09241	4.07109	0.0142673	4.96658	0	0	0.0830926	2.27845	0	1.52277	0	0	0	2.93489	4.12726	0	12.3292	0.643437	0	0	0.0798915	0	0.156629	0	4.05277	0	0	0	4.31777	4.25191	0.548057	6.62156	1.79367	0	0.0818858	0.0636366	0	0.359856	0	0	0	7.3367	7.84105
hs1392	4.767	0	0	0	0	0	0	0	0	0	0.022985	4.00966	0.607913	0	0	0	0	0	0	0	0	0	0	0	4.09205	0	5.13847	4.70774	4.40671	4.70774	0	0	0	0	0	0	0	0.474352	4.27331	0	0	0	0	4.68613	0	4.55129	0	0	0
hs1688	4.75397	0.0239471	2.97027	0	0	0.193078	0.0356602	0	0	0.827457	0.0246695	3.69372	4.09863	0	0	0	0	4.91858	0	0.241997	0.829806	0	0.947289	3.88842	0	0	0	0.0379974	4.21532	0	4.15205	0.0120188	3.84538	0	4.23662	0	0	3.44473	6.49015	4.72537	5.28682	6.12662	5.63022	3.94442	0	3.75143	5.53258	5.49976	13.2539
mm1393	0	0.0794703	0	0	3.51869	0	4.07935	0	4.27572	0	0	4.95428	0.917796	0	0	4.0942	4.83863	4.40997	0	0	0	0	0	0	4.03377	0	0	0	0	0	1.41403	2.01328	1.56003	0	1.51404	1.17685	1.20036	8.65746	7.06709	4.28496	4.42765	5.11117	5.13937	0.0855684	0	0	4.7295	5.674	4.6982
hs1616	4.12668	5.21538	0	0	0	0	4.02826	0	0	0	0.893911	3.3209	4.85078	4.92524	0	0	0	0	0	0	0	0	0	0	3.93853	0	0	0	4.22695	0	8.60455	0.957151	8.50856	0	9.26992	0.713927	0	5.79498	4.10177	0	3.56717	0	2.68756	0	0	0	3.41138	0	0.132044
mm1359	0.0443022	0.0804479	0	0	0	0	0	0	4.31415	0	0.0180098	2.17084	9.32121	0	0	0.895489	0	0	0	0.010298	0	0	4.1914	0	0	0	0	0	0	0	1.11828	0	1.24061	0	0.0102548	0	0	5.12195	4.5985	0	3.78603	0.0329558	0.0124931	2.37075	0	3.73293	0.0204577	0.0266117	0.0367328
mm78	0.574699	0.0350537	0.0538098	0	0	0	0	0	0	0	0	0.10493	0	0	0	0	0	0.0125125	0	0	0.0113373	0.0395259	0	0	0.0136872	0	0	0.291566	0.469783	0	0	0.019012	0	0	0	0	0	0.420997	0.2801	0.132363	0.289952	0	0	0.445375	0	0	0	0.12337	0
hs2156	0.294412	1.31484	0.0163596	0	0.272649	0	0	0	0.446752	0	0	0.0147898	0	0	0	4.56617	3.63225	0	0	0.220583	0.0178112	0	0.190235	0	0.0400584	0	0.235377	0	0	0	0	0.0261625	0.0182816	0	0.215086	0	0	0.0517472	0	0	0	0	0	0	0	0.999756	0	0.0561681	0.415197
mm529	0	0	0	0	2.70991	0.651998	0.699257	0	0	0	0	0.0645552	1.69762	0.0200932	0	0	0	0	0	0.557954	0	3.932	0	0	0	0	0	0	0	0	0	0.803043	0	0	0	0	0	0.0949925	4.07895	0	0	0	0	0	0.0698145	0.022249	0	3.94549	4.994
hs1657	0	0	0	1.00136	0	4.1707	0	0	0	0	0	0	0.957823	0	0	0	0	0	0	4.00711	4.00672	0	4.623	1.57485	0.0177914	0	4.37282	0	0	0	0.117852	0.163555	0.224127	0.144346	0	0	0.668564	6.10192	1.37058	0	0	0	0	0	0	9.48696	0	1.89955	4.65503
hs1481	0	0.802393	0	4.7557	0	3.25943	3.90316	3.77267	0	3.64072	0	0	4.34637	0	0	0	0	4.43489	0	7.09433	3.5969	5.61402	4.45713	0.40352	0.0155896	0	0.0596794	4.1798	0	0	12.1771	8.31485	4.20879	0	7.45882	0	0	0.283782	0	0	0	3.8959	4.1117	0	3.02573	0	0	0	0
hs1466	0	8.58398	0.0115987	4.10757	0.0487983	0	3.03838	0	5.17689	0	0.351608	4.19345	0.0362531	0.0259901	0	0.0514595	4.3115	0	0	0	0	0	0	0.0297303	0	0	0	0	0	0	3.61028	2.81856	3.25653	0	4.71555	0	0	6.21374	9.14737	4.04866	8.33209	8.89676	9.16368	3.18472	0.0566277	0.973361	4.16368	9.53954	8.24879
mm336	0	0	0.0781139	0	0.142757	0	0	0	0	0	0.0495283	0.0158098	0	0	0	0.0225691	0.0223409	0	0	0	0.0960737	0.101385	0.412068	0	0	0	0.0656994	0	0	0	0	1.13363	0	0	2.30604	0	0.0228112	0.044948	0.834742	0	0	0	0	0	0.0190932	0.155342	0	2.0347	0.700955
hs1624	0	3.24823	0	0	0	0	0	0.0502853	0	0.0530655	0	1.60524	0.723836	0	4.54114	0	0	0	0	0	0.0539393	0	0	0	0	0	0.390327	0	0	0	0	0.107496	0	0	0.200844	0	0	1.99821	0.235742	0	0	0	0	0	3.71576	0	0	0.211823	0
hs1903	2.97767	8.17802	0	0	0	1.07992	6.24572	1.22603	0	1.26097	4.2473	5.91363	5.26529	0	2.46251	4.30941	4.18629	0	0	0.0221376	1.16226	0	0.023883	3.25084	0	0	0.162305	0	0	0	9.9057	5.59478	4.63403	0	9.71815	0.143362	1.56257	3.49854	8.517	4.77469	7.58868	4.01368	4.70653	0	2.48055	3.73834	0	6.33462	4.08302
mm296	4.44919	5.2057	0	0	2.3266	0	0	0	2.07192	0	5.517	0	0	0	0	0	0	0	0	0	0	0	0	2.44004	6.7986	0	1.33231	0	0	0	0	0	0	0	0	0	0	13.4898	0	0	0	0	0	5.03911	0	0	0	3.61434	0
hs1369	4.67229	9.72595	0	0	0	0	0	0	3.89549	4.04291	0	0	0.0107609	0	3.67014	0.34108	0.210192	0	0	0	0	0	0	0	0	0	0	0	0	0	1.32112	1.47397	0	0	0	0.0541489	0	0	0.0949847	0.0756981	0.0851074	0.0785899	0.145998	4.12897	4.22403	0.110613	0	0.593153	0.121514
mm815	0	0.521165	0	0	1.15811	0	0.804872	0	0	0	1.5896	2.38151	1.52917	5.1247	0.544708	0	0	0.0375383	0	0.0132508	0.0127672	0	0	0.206329	0.010205	0	0	0.0396162	0.0395675	0	0.0774218	0	0.0449291	0	1.12707	0	0	4.80813	4.36251	0	4.06753	0	4.21098	0.321412	0	0	0	2.64438	0
mm12	0.0421928	0.297203	0	0	0	0	4.12552	0.110176	0	0	0	0.697541	4.24476	0	0	0	0	1.53561	0	2.39036	0	0	1.92427	4.12375	0	0	2.07275	2.18217	2.20581	2.32752	2.60416	0	2.60587	0	2.2352	0	0	5.16031	4.23839	0.0742655	0.080996	1.16875	1.56822	3.82981	0	0	0.0893337	0.787556	0.101584
hs1486	0.0155572	0.010136	0.089486	0	0	0	0	0	0	0	0	0	0.130734	0	0	0	0	0	0	0	0	0	0	0.0158951	0	0	0	0.0138782	0.0171012	0.010851	0.07192	2.92927	0.0660364	0	0.0863949	0.0688016	0	3.8933	1.72473	2.04387	0	4.04453	2.9629	0	0	0	0	3.03585	3.66518
mm6	0	6.13728	0	0	0	0	0	0	0	0	0	3.6551	0	0	0.0945458	0	0	0	0	0	0	0	0	6.51894	0	0	0	0	0	0	0	0	0	0	0	0	0	0	0	0	0	0	0	0	0	0	0	0	0
hs352	7.39537	0	0	0	1.10974	0	4.37779	0	2.60714	0	0	0	5.87112	0	0	0	0	0	4.34969	1.72391	3.89211	0	0	8.02351	0	0	5.25758	4.27862	4.32495	3.52222	0	0	0	0	0	4.14206	5.67013	0	0	0	0	0	4.18709	7.55219	0	0	0	4.3439	4.22768
hs353	4.18977	5.34775	4.1986	0	0	0	0	0	0	0	0	0	0	0	0	0	0	0	0	0	0	0	0	4.18719	7.39173	0	0	0	0	0	4.98716	13.616	0	4.64975	0	0	0	0	0	0	0	0	0	0	0	0	0	0	0
hs622	9.72845	9.05626	0	0	4.15864	0	0	0	0	0	3.83647	0	7.98701	0	0	0	0	4.45729	0	0	0	0	0	4.2601	9.4122	4.20621	0	4.08566	4.19928	0	0.973543	3.36551	0	0	2.18846	4.18594	8.49895	0	0	0	0	0	0	0	0	0.135591	0	2.1533	0
hs1931	0	0.0970414	0	0	0	0	0	0	0	0.0184702	0	0.847602	0	0	0	0	0	0	0	0	0	0	0	0	0.0967225	0	0	0	0	0	0.577149	0.0314634	0.0501967	0	0.0269204	0.0435728	0.0587711	0.0192695	0.0324498	0	1.01909	0	0	0	0	0.855793	0	0.857427	0.818855
mm799	8.44677	8.71547	0.019372	0	0	4.04909	4.39588	4.0762	0.328588	0	0	2.99533	0.180525	0	0	0.0434131	0.0145892	1.63131	0	0	4.06324	0	4.10266	6.69099	4.24312	0	0	4.28966	8.69602	4.31139	0.0178041	0	0	0	0	0	0	0.680096	0.65015	0	0	0	0	7.74842	0	0.810503	0	0.0505454	0.254281
mm3	0	0	0	0	0	0	0	0	0	0	0	0	0	0	0	0	0	0	0	0	0	0	0	1.1688	0	0	0	0	0	0	0	0	0	0	2.49292	0	0	0.0613115	1.29347	0	0.184024	1.19705	0	0	2.45186	0	1.24495	1.56672	1.40182
hs807	4.43533	4.51387	0	0	0.259915	2.14828	0	2.5722	0	3.01394	0	5.68194	0	0	0	0	0	0	0	4.02302	2.95624	0	2.90128	0	0	0	0	0	4.17134	0	0.221912	1.52513	0	0	1.72089	0	0	0	4.40943	0	0	0	0	0	4.30364	0	0	4.49611	7.37059
hs294	5.03953	0	0	0	0	0	0	0	0	0	0	0	0.0471678	0	0	0	0	0	0	0	0	0	0	0	0	0	0	4.42366	4.24949	0	0	0	0	0	0	0	0	3.38403	4.7151	4.41775	0	4.39016	9.95247	0	0	0	4.87703	9.90374	8.78273
hs1223	4.19928	5.35679	0	0	0	0	0	0	0.0149185	0	4.00087	0	0	0	0	0	0	0	0	0	0	4.27491	0	0	0	0	4.07436	0	0	0	4.92445	8.98011	4.8962	0	9.72851	0	0	0.177614	0	0	0	1.92419	0	0	0	0	0	0	0
hs701	0	0	0	0	0	0	0	0	0	0	0	4.48149	4.38934	4.42597	0	0	4.57349	0	0	0	0	0	4.64589	0	0	4.56225	0	0	0	0	4.15428	8.52075	0	0	4.04431	0	0	3.73517	0	0	0	0	4.26989	8.58364	0	0	0	4.29414	0
hs1226	0	3.7447	0	0	4.01818	0	0	0	0	0	0	0	4.83268	0	0.0218697	0	0.028942	0	0	0	0	0	0	7.18515	0	0	0	0	0	0.674775	0	0	0	0	10.9239	0	0	17.5647	0	0	0	3.95372	0	0	0	0.703	2.38139	3.98677	0
hs1148	0	4.45353	0	0	0	0	0	0	0	0	0	4.21042	0	5.52871	0	0	0	0	0	0	0	0	0	0	8.39955	0	0	4.01682	5.09849	0	3.82423	0.0713693	4.02228	0	3.83608	0	0	0	4.4389	4.50864	13.5351	4.39041	4.27003	4.66994	5.46555	0	4.01818	4.58838	0
hs110	8.74425	0	0	0	0	0	8.97426	0	0.289153	4.13136	4.39903	0	0	4.4023	4.00261	0	4.10127	0	0	0	0	0	0	0	0	0	4.23136	4.70774	4.70774	8.76728	4.48812	4.30808	4.64975	0	0	0	0	4.48204	5.50169	0	4.15428	4.56703	6.62893	0	4.31785	0	5.04721	5.5867	4.92445
hs1007	10.5917	0	0	0	0	0	0	0	0	4.67162	3.66684	0	0	0	0	4.87615	0	0	0	0	0	0	0	1.92031	0	0	0	0	8.35638	4.09909	8.82665	4.04576	5.0942	0	4.04048	5.16178	5.55129	0	0	0	0	0	0	6.31605	0	0	0	4.9914	0
hs1019	0	0	0	0	0	0	0	0	0	0	0	0	0	0	0	0	0	0	0	0	0	0	0	4.86212	8.01955	0	0	0	0	0	0	0	0	0	4.04647	0	0	13.6922	0	0	0	0	0	0	0.0346512	0	0	4.50814	0
hs844	4.75696	0.011259	0	5.11976	0	0	0	0	0	0	0	0	4.08619	4.08513	0	0.0837802	0	0	0	0	0	0	0	4.19918	0	0	9.08179	4.44129	9.40696	4.32883	4.21824	0	0	0	0	0	0	0	8.85717	0	5.04144	4.13787	4.41117	12.3874	4.97469	8.6599	0	9.0758	4.34486
hs239	0	3.79804	0	0	0	0	0.715454	0	0	0	0	0	0	0	0	0.273729	0	0	0	0	0	0	0	0	7.92218	0	0	0	0	0	0.0677734	0	0	0	0.0567509	0	0.0690031	1.08683	0	0	0.0851158	1.16486	0	0	0	0	0	4.09988	0
hs2420	0	0	0	0	0	0.0149622	0.0109634	0	0.0283309	0	1.59996	3.80123	0	0	0.190806	0	0	0	0	0.0125659	0	0	0	1.14217	0.380821	0	0	0	1.67726	0	0.0183145	0	0	0	0	0	0	0	0	0	0.188402	0	0	0	0	0	0	0.251859	2.42771
mm41	0	0.509333	0.0516668	0	0.118956	0.0122316	0.0185105	0.0125343	0.266998	0.0151477	0	0.0118115	0.348525	0.404752	0	0	0	0	0.25748	0	0.590405	0.269021	0.0177679	0.152531	0	0	0	0	0	0	0.137345	0.0604426	0.013466	0	3.82869	0	1.21614	0	0	0	0	0.0735748	0.280046	0	0.093649	0.497015	0	0.0734327	2.30892
hs1837	6.7226	2.91608	0	0	0.0119798	3.36883	4.19998	0	0	3.6944	0	0	0.212041	0.0514496	0.221951	0	0	0	0.022296	0	0	0	3.96063	0	0.0131396	0	0	0	0	4.48534	2.8149	3.08523	3.18705	0	0	0	0	0	1.97223	0	1.39661	0	0	2.59968	0	0	2.01026	2.00545	1.93377
hs2139	0.10456	0.381278	0	0	0.0190777	0.105118	0.11267	0.116368	0	0	0.0566605	0	0.0260805	0	0	0	0	0	0	0.190448	0.125842	0	0.106482	0	0.0854098	0	0	0	0	0	0	0	0	0	0.0231949	0	0	0.387324	0.196394	0	1.26191	0	0	0	0.016735	0.0295842	0	0.167037	0
hs2138	0	4.07951	0.049901	0	0	0	0	0.0427144	0	0	0	0	0	0	0	0	0	0.0738366	0	0	0	0	0	0	0	0	0	0	0	0	0	0	0	0	0	0	0	0.657674	0	0	0.0250099	0.618166	0	0	0	0	0	0.0191399	0
hs2137	4.8921	0.0559423	0	0	0	0	0.0469511	0.0421699	0	0	0.0102388	0	0	0	0	0	0	0	0	0.0875206	0.0338756	0	0	0.0136984	0	0	0.117587	0.100311	0	0	0.0128846	0.013668	0	0	0	0	0.0510164	0	0	0	0	0	0	4.40625	0.252243	0.0243319	0	0.0280074	0.132175
hs2134	2.11779	3.25155	0	0	0.766217	2.09166	1.96621	0	0	2.09073	0	0	0	0	0	0	0	0	0	1.96196	2.42686	0.457491	2.5644	0.0853154	0	0	0.0729625	0	0	0	0.0125027	1.93199	0	0	0.331635	0	0	0.0172253	0	0	0	0	0	0	0	0.964446	0	0	0
mm1376	0.911447	3.32895	1.30498	0.0321586	2.33846	0	0	0	0.12887	0	0.278976	0.360739	3.31574	0	0	0	0	0	0	0.167717	0	0	0	0.357216	0	0	0.221383	0.0319928	0.803766	0.599935	0	0.0861281	0	0	0.125786	0	0	1.58828	4.41074	0	4.19915	1.49619	4.13483	0.947976	0.103996	0.098943	4.05147	3.86183	4.12579
hs2079	0	0	0.0129336	0	0	0	0	0	0	0	0	0.0380831	0.0408764	0	0.0187268	0	0	0	0	0	0	0	0	0	0.0310092	0	0	0	0	0	0	0	0	0	0	3.35699	0	4.84268	0.0227746	0.0218238	0.0216047	0	0	0	0	0	0	0.0165567	0
hs1132	0	2.21969	0	0.119088	0	0	0	0	0	0	0	0	0	0	0	4.11458	4.39125	0	0.182826	0	0	0	0	4.48995	0	5.12205	0	0	0	0	0	0.193159	2.47025	0	0.082397	4.12958	0	9.84337	4.06627	0	4.22633	0	4.12977	4.44491	0.320108	0	0	0	4.59686
mm1179	7.30008	0	0	0	0.0142294	0	0	0	0	0	0	0.0130819	0.012503	1.66524	0	0	0.0851659	0	0	0	0	0	0.263884	0	2.11571	0	0	4.0865	0	0	0	0	0	0	0	0	0	0.0161392	0	0	0	0	0	4.36636	4.31619	1.58678	0	0	0
hs1213	3.72698	0	0	0	0	0	0	0	0	0	0	0	0.0695285	0	0	2.35016	0	4.39147	0	0	0	0	0	0	4.8962	0	4.16622	0	0	0	0	4.28316	0	0	4.43297	0	0	5.33595	6.58829	0	4.13083	0	0	4.15927	5.05799	0	0	1.95523	4.4695
hs111	0	0	4.24718	0	0	0	0	0	0	0	4.70774	7.65458	0	0	0	0	0	0	0	0	0	0	0	0	0	0	0	0	0	0	7.2638	1.25675	0.012721	0	0.153279	0	0.15084	0	0	0	0	0	0	0.0837904	0	0	0	0.0359897	4.26764
hs1586	0	0	0	0	0	0	0	0	0.0115167	0	0	0	1.71347	0	0	0	0	0	0	0	0	0	0	0	4.35185	0	0	0	4.1342	4.27657	1.47897	1.9011	4.02871	0	1.80253	0	0.124007	0	0	0	0	0	0	5.53405	0	3.94106	0	0	0.0389197
mm652	0	3.75935	0	0	0	0	0	0	0	0	0	0	0	0	0	0	4.04299	0	4.29499	0	0	0	0	0	0	0	0	3.07312	3.71196	0	7.89319	0	0	0	0	0.433656	0.497805	0	0	0	0	0	0	3.60369	0	0.035171	0	0.0920758	2.69226
mm653	0	5.76571	0	0	0	0.113518	0	0.110342	0	0	0.683307	5.11941	4.82177	3.47697	0	4.48545	4.04888	0	0	0	0.116424	0	0	4.581	0	0.157939	0	8.9189	8.58348	4.60555	4.06956	2.47616	3.34086	0	4.0059	0	0	0	5.54127	0	4.10155	4.35756	4.51335	0	0.035843	0	4.19028	7.56014	4.4037
mm743	0.860949	6.29033	0	0.132311	0.704317	0	0	0	0	0	0	0	0.578926	0.0625235	0	0	0	0	0	0	0	0	0	1.57237	0	0	0	0.75706	0.728268	0	0.283948	0.946542	0.24183	0	0.697033	0	0	0.595803	3.81021	0	0.222601	0.163676	0.0813663	0	0	0	0	3.83964	0
hs1352	0	3.70706	0	0	0	0	0	0	0	0	0	0	0	0	0	4.26641	0	0.244333	4.04315	0	0	0	0	3.49817	4.05007	0	0	4.42366	4.25548	0	4.03687	0.187253	0	0	4.30253	0	0	0	0	0	0.185594	0	0	0	0	0.926834	0	0	0
hs1335	4.20051	0	3.23471	0	4.38934	0	4.9599	0	0	0	0	4.14555	3.93575	0	2.10873	4.37263	4.2815	4.3148	0	4.11126	0	0	0	2.3388	1.61085	0	9.42419	0	5.52907	3.66939	0.0193086	3.64984	3.53683	3.36589	0.025648	0	3.74122	0	0	0	0	0	0	4.29072	0	0.194151	0	4.04172	0.0581719
mm265	5.84979	3.48945	0	0	3.34731	0	0	0	4.26937	0	0	0	0.399545	1.32087	0	0.285105	0.21542	0	0	0	0	0	0	2.44287	2.90299	0	0	4.11156	5.64942	4.49321	4.08261	1.17242	0	0	3.95204	0	0.254344	2.51642	3.08891	0	0	0	0.390006	4.6123	0	0	3.19582	7.99332	0
hs1972	0.185017	0	0	0	0	0	0	0	0	0	0	0.083346	0.0115072	0	0.0404259	0	0	0	0	0	0	0	0	1.39592	0.0457918	0	0	0.152776	0.14235	0	0.0712349	0.0524008	0.0648609	0	0.0576381	0	0	0	0	0	0.0591012	0.0440526	0	0	0	0.0424012	0	0.0385994	0.0510049
hs1340	0.133926	0.597297	0	0	8.71613	4.5391	8.39908	4.72816	0.0808587	4.83268	0	0	0	0.0221048	0.786517	0.0166399	0	0	0	0	5.14206	0	4.85078	9.69342	0	0	4.12997	4.15227	5.84634	0	4.03827	0	0	0	4.00579	0	0	4.9431	4.18809	0	1.0884	4.01975	4.19623	0	0.114181	0	4.27075	4.37603	4.25166
hs2234	0.801479	1.61742	0	0	0	0	0.701372	0	0.0333143	0	0.587041	0	0.230835	0	0	0	0	0	0	0.210079	0	0.0133993	0	0	0.279119	0	0.27299	0.494187	0	0	0	0	0	0	0.308466	0	0	0	0.125739	0.0830276	0.395936	0	0	0.674193	0	0.105013	0	0.108448	0
hs1391	0	0.144028	0	0	0	0	0	0	0	0	0	4.14205	0	0	0	0	0	0	0	0	0	0	0	0.0367048	0	0	0	0	0	0	0	0	0	0	0	0	0	0.709411	0.0283776	0	0.0265438	0	0	0.0113423	0	0	0	0.0243202	0
mm1307	0	1.56189	0	0	0.760098	0	0.209431	0	0	0	0.0146205	0.0104042	0.236169	0	0	0.22326	0	0	0.182976	0	0	0	0.381059	0.153765	0	0	0.326247	1.40407	1.31493	1.40407	0.0221666	0.93875	0.0771945	0	1.51309	0	0	0.110442	1.55091	0	1.50133	0.122167	0	0	3.32012	3.30289	0	1.94685	0.370101
mm180	0	0	0	0	0	0	0.0171984	0	0	0	0	0	0	0	0	0	0	0.0450622	0	0	0	0	0	0	0.442918	0	0	0	0	0	0.110843	0.102785	0.122114	0	0.133129	0	0	0.0213121	0	0	1.92041	0	0.0665684	0	0	0.0890852	0	0	0.0948737
hs2060	0	0	0.0159182	0	0	0	0	0	4.91074	0	0	0	0	0	0	0	0	0.0284211	0	0	0	0	0	0	0	0	0	0	0	0	0	0	0	0	0	0	0	0	0	0	0	0	0	0	0	0	0	0	0
hs2061	0	0	0	0	0	0	0	0	0	0	0.19253	0	0	0	0	3.98957	0	0	0	0	0	0	0	1.69486	0.0241755	0	0	0	0	0	0	0	0	0	0	0	0	1.48557	4.6476	0	0	4.42007	0	0	0.0492445	0	0	4.95995	0
hs2191	0	1.58465	0	0	0.100951	0	0	0	0	0	0	0	0.851333	0.0251319	0	0	0	0	0	0	0	0	0	2.58143	0	0	0.0851943	0.0165795	0.0141601	0	2.69536	2.03331	0	0	0.0843569	0	0	1.80307	0	0	0	0	0	0	0	0	0	0.425708	0
hs1315	0.0125883	0.487125	0	0	0	0	0	0	0	0	0	0	2.70344	0	0	0	0	0.0499072	0	0	3.00125	3.19719	0	0	7.58108	0	0	0	0	0	0	0	0	0	0	0	0	4.08796	0	0	0	0	2.76917	4.02045	0	2.37987	0	0.123126	0
mm1403	4.31247	0	0	0	6.93265	0	0	0	0	0	3.95249	0	0	0.0447614	0	0	0	0	0	0	0	0	0	2.89139	0	0	0	3.74654	3.74654	0	5.43341	11.4996	6.22201	0	6.21986	1.96519	0	4.76326	0	0	0	0	0	6.08627	0	0	0	0	0
hs279	14.4619	0	0	0	0.0472662	0	0	0	0	0.0154744	4.14267	4.42022	0	0	0	0	0	0	0	0	0.0158751	0	0	4.07517	3.09796	0	9.79061	2.94462	4.6848	4.39577	8.36859	0.0654869	0.0311856	0	3.03209	0	0.0421383	0	0.224958	0	0	0	0	10.06	0	0	0	8.41283	0.0110732
hs1252	4.37025	4.23748	0	0	0	4.0961	4.01912	4.46792	0.149693	4.29168	0	0	4.11805	0	0	4.3867	4.64533	0	0	4.38928	4.00804	0	0	4.06239	0	0	0	0	0	0	5.3453	4.41847	4.83506	0	5.09896	0	0.0528526	0	4.08513	4.01323	4.31876	4.16541	4.08827	0	0	3.27441	0	11.0534	0
mm192	0	0	0.759763	0	0.0128779	0	0	0	0	0	0	0	0	0	0	0	0	0	0	0	0	0	0	0.0356303	0	0	0	0	0	0	0	0	0	0	0	0	0	1.24514	0	0	0	0	0	0	0	0	0	0	0
mm235	0	0	0	0	0	0	0	0	0	0	0.0104595	0	0	0	0	0	0	0	0	0	0	0.0155121	0	0	0	0	0	0	0	0	0.423841	0.603804	0.418159	0	0.652682	0	0	0	4.16784	0	0	0	0	0	0	0	0	0	0
mm193	0.421958	0	0	0	0	0	0	0	0	0	0	0	0	0	0	0	0	0.277019	0	0	0	0	0	3.21126	0	0	2.24557	0	0.428835	0.352987	0.168024	0	0.198765	0	0	0.131014	0.160054	1.21353	0	0	0	0	0	0	0	0	0	0	0
hs2049	0	0.942126	0	0	0	0	0	0	0	0	0	0	0.0129873	0	0	0	0	0	0	0	0	0	0	0	0.0648098	0	0	0	0	0	0	0	0	0	0	0	0	0	0	0	0	0	0	0	0	0	0	0	0
mm132	0.0168179	0.103931	0	0	0.0561089	0	0	0	0.0166867	0	0	0.843125	5.65464	0	0	0	0	0	0	3.64092	0	0	0	0	0	0	0.234943	0	0	0	4.01773	1.18019	3.80536	0	0	0	0	0	0.0684438	0.0358569	0.0602613	0.0733855	4.2473	0.0175569	2.44051	1.56853	0.11631	4.30287	0.160967
mm813	0.0800217	0.254337	0	0	4.47314	0	0	0	0.0276978	0	0	0.0892752	0.977993	0	2.41069	0	0	0	0	0	0	0.520995	0	3.29286	0	0	1.1967	0.0547171	0.074405	0	4.43622	4.27599	4.2335	0	4.65965	3.70966	0	4.14584	1.27851	0	0.0520706	0.0304928	0.0309208	0.0377059	0	0.0420373	0.0319321	0.96934	1.34254
hs2067	0	0.572977	0	0	0	0	0	0	1.81603	0	0	0	0.331639	0	0	0	0	0	0	0	0	0	0	0.222597	0	0	0.0300131	0	0	0	0.301295	0	0	0	0	0	0.219978	0.319024	0	0	0	0	0	0	0	0	0	0	0.26126
hs2405	2.97351	0	0	0	0	0	0	0	3.82063	0	2.01589	0	0	0.359114	0	0	0	0	0	0	0	0	0	0.013225	0	0	0	2.81637	0	0	0	0	0	0	0	0	0	0.0922804	0.204259	0	0	0.238333	0.229628	0	0	0	0.237351	1.6935	0.193792
hs1052	0	0	0	0	0	0	1.60067	0	0	1.33792	0	0	0	0	0	4.19246	4.23732	7.2943	0	0	0	0	0	4.8248	4.14339	0	0	2.55729	0	0	0	0.498582	0.95298	0	4.18395	0	0	3.54023	4.47277	4.23873	4.17765	4.03198	5.25727	0	0	4.09866	0	4.46831	9.46411
hs1580	0	0.843452	0.0109005	0	0	0	0	0	3.51624	0	0	0	0	4.25414	0.568287	0.89704	5.82459	0	0.119047	0	0	0	0	0	0.511512	0	4.20966	0	4.07572	0	2.55063	0.375721	0.598043	0	1.04148	0	0.738903	0	4.73225	0	1.15734	0	3.56992	1.29583	0	0.108271	0.211201	0.155119	0.213621
hs1094	4.20135	4.38144	0	0	0	0	0	0	0	0	0	0.832473	0	4.55769	4.10736	0	0	0	0	0	0	0	0	0	4.21467	0	0.193226	4.50169	10.815	9.31173	4.13053	0	4.27327	0	0.0359671	0	0	0.29617	0.0408672	0	0	0	9.30537	4.29158	0	0	0	0	0
hs1542	0	0	0	0	0.0428023	0	0	0	0.0500731	0	0	0	0.0154433	0	0	0	0	0	0	0.637426	0	0	0	0	0.52108	0	0	0.169193	0	0	0	0	0	0	0	0	3.9468	0	0	0	0	0	0	0	0.0936311	0	0	2.11156	0.305251
hs1533	8.31651	4.6216	0	0.553847	0.278927	0	5.90734	0	0	0	12.7252	8.15096	0	0	0	4.26376	0	0	0	0	0	0	0	4.17134	4.14448	0	0.520645	4.05306	0	0	0.0131675	0	4.1792	0	0.846062	0.0231758	8.15787	8.7553	4.59537	0	4.54363	0	0	4.46894	4.38075	0.635148	4.20412	4.61618	4.11577
hs1175	0	0.16883	4.28988	0	5.02239	0	0	0	0	0	0	2.05998	0	0	0	0	0	4.00833	0.789071	0	0	4.24413	0	4.01078	0	0	3.79648	4.40894	4.08672	4.1861	4.17813	4.11182	0	0	4.09264	0	4.06644	4.44688	5.11793	4.35958	4.99724	4.45469	0.0127275	0	1.16637	0	0	8.62024	4.03668
mm939	0	0.522745	0	0	0	0	0	0	0	0	0	0	0.238561	1.30732	0	0	0	0	0	0	0	0	0	0	0	0	0.307698	0	0	0	0	0.0155125	0	0	0.0369116	0	0.0412166	0	4.69233	0	0	4.01166	0	0	0	0	0	4.21836	0
mm625	11.2812	5.40768	0	0	0	0	0	0	0	0	0	1.08149	1.91997	0	0	0	0	0	0	0	0	0	0	0	0	0	0	12.2571	12.7525	7.33999	0	0	0	0	0	0	4.13077	0.18811	0	0	0	0	0	7.00335	0.0289768	0	0	0	0
mm922	0	4.23359	0	0	1.15359	4.16707	0	0.0294779	0	0.0287166	0	0.066974	0	0	0	0	0	0	0	0	3.31658	3.21972	0.0373151	0	10.9848	0	0	4.21538	4.43849	5.33278	0	1.2259	0	0	3.68449	0	0	3.22052	0	0	0.292237	0	0	4.2233	0	0	0	3.5933	0
mm1300	0	0	0.0381224	0	1.50144	0	0.0636617	0	0	0	0.0309786	0.222695	0.0294271	0	0	0	0	0	0.0143631	0	0.0101688	0.20098	0	0.168455	0	0	0	0	0	0	0	0	0	0	1.53713	0.0281449	0.0646889	0.593324	0.300479	0.293036	0.334566	0.0381675	0	0	3.72334	3.08181	0.0357697	0.284307	0.33403
hs1339	0	4.71135	0	7.99987	0.774489	0	0	0	0	0	0	0	0	0	0	0	0	0	8.65033	0	0	0	0	0	0	0	0	0	0	0	3.60924	2.28961	0	0	1.07517	0	0	0.768959	0	0	0	0	0	4.18111	4.83117	0.527567	0	0	0
hs1256	14.3319	21.855	0	0	7.87555	0	0	0	0	0	0	0	0	0	0	0	0	0	0	0	0	0	0	0.124409	2.48109	0	0	4.01728	0	0	4.69338	4.36333	0	0	7.3199	0	0	0	0	0	0	0	0	19.472	0	9.31478	0	0	0
hs2229	0	2.39461	0	0	0	0	0	0	0.0331296	0	0	0.608031	2.05968	0	0	0.0578052	0.0522031	0	0	0.0451281	0	0.178572	0	5.00034	0	0	0	0	0	0	0	0	0	0	0	0	0	0.0183745	0.066799	0.0541001	0.0627656	0	0	0	0	0	0	0.027974	0
hs1594	4.5742	5.32482	1.52933	0	0	3.83299	0.0354452	3.8122	0	0	4.39636	7.32023	0.699758	1.48481	0	0.459209	0.262725	0	0.135165	0	5.23256	1.14839	0	1.7021	0.0622089	0	0	0	0	0	2.25759	1.92774	2.72245	0	3.22523	0	0	0	0	0	0	0	0	0.0534919	0.158054	2.06692	0	0	0
hs1473	4.60274	4.31966	0	0	0	0	0	0	1.42435	0	0	0	0	0	0	0	0	0.0323198	0	0	0	0	0	2.96234	4.48322	0	0	0	0	0	0	0	0	0	0	0	0	0.0998779	4.08831	0	0	0.7372	0.573586	0	0	0	0.697303	8.69018	4.007
mm14	4.31833	0.143237	0	0.871263	0	2.61555	2.80779	0	0	0	0.11632	0	2.78559	3.24121	0	0	0	0.188219	1.08395	0	0.0131637	0	3.28197	0.126468	3.93725	0	0.197013	0	0	1.08655	0	0	0.0246117	0	0	0	0	0.0381591	0.169035	0	0.0693792	0.0104661	0.035976	0	1.47807	5.12469	0	0.0138114	0.0481557
mm745	4.18509	4.42829	0	0	6.70734	0.465371	0.689995	0.22211	0	0	4.49485	4.34491	4.38923	0	4.01592	0	4.44301	0.108636	0	0.0244097	0	4.52433	0.413499	1.36606	0.044179	0	0	0	0	0	6.26386	7.16787	4.24737	0	9.28578	0	0	0.197313	0	0	0	0	0	0.105782	1.23122	4.40363	0.852486	4.03484	0.871339
hs1463	8.84536	3.77922	0	0	3.04433	0	0	0	0	0	0	1.11649	1.67284	0	0.0152371	0	0	0	0	0	0	0.0218462	0	0.0119642	0.136195	0	0	0	4.19025	0	0.102033	0	0.661539	0	0.0519516	0	0	5.50805	4.03577	0	0.352226	4.03162	0.0494284	4.24266	3.66887	0.0529623	0	4.72492	4.02039
hs1258	4.14569	0	0	0	0.0122477	0	0	0	0	0	0	4.33819	4.0511	0	0	0	0	0	0	0	0	0	0	4.35556	0	0	0	8.28178	0	0	8.33125	4.31122	4.54921	4.50283	3.61984	0	0	0.30203	0	0	0	0	0	4.10513	0	3.66861	0	0.481908	0
hs1417	4.48545	0	0	0	0	0	0.0155588	0	0	0	0	0	0	0	0	0	0	0	0	0	0	0	0	0.35042	5.91692	0	0	0	0	0	4.31395	0	0	0	0	0	0	0	0	0	0	0	0	0	0	0	0	0.0780451	4.32148
hs2305	0	0	0	0	0	0	0.814111	0	0	0	0.28654	0	0	4.18776	0	0.423321	0.176419	0	0	0	0	0	0	8.58681	0.148201	0	0	0	0	0	0	0.212967	0	0	0.0150274	0	0	0	0	0	0	0	0	0	0	0	0	0	0.0124127
mm1330	0	0.12968	0	0	0	0	3.31099	0	2.55281	0	0	0.984635	0	0.0372303	0.0121168	0	0	0	0	0	0	0	0.05294	0	0	0	0	0.390437	0	0.373663	0	0	0	0	0	0	0	0.98321	0.0722558	0	0.0847814	0	0.092304	0	0	0.319277	0	0	0
hs261	8.51676	0	0	0.17517	0.432907	0	0	0	4.22257	0	0	0	1.27673	0.724194	0	0	0	4.38616	0	0	0	0	4.92082	1.8747	0	0	0	4.70997	4.70997	8.41374	0.0123894	0	4.20343	0	4.17587	0	9.76688	0	0.945434	0	0	0.253263	0.25287	0	0.431911	0.477201	0.265811	0.267139	0.267328
hs180	4.57187	9.47574	0	1.50838	0	0.262353	0.434008	0.307279	0.0729716	0.322024	0	4.18659	4.06753	4.56225	0	3.92678	0	0	0	0	3.3341	3.01236	0	6.82615	0	0	0	0	0	0	4.02549	4.27572	4.18376	0	4.41567	8.73896	4.28544	4.14183	0.0193462	0	0	4.14737	0	4.74232	0	0	0	0.016767	0
hs754	12.3877	9.02698	0	0	2.97342	0	0	0	4.13789	0	0	0	0	0	0	0	0	0	0.596628	0	0	4.32196	0.0142576	4.20727	4.20204	0	3.4258	0	9.18067	3.77376	0	4.13515	0	0	4.2778	0	0	0	0	0	0	0	0	9.24289	0	0	0	0	0
hs533	0	4.72584	0	0	3.95643	0	0	0	0	0	0	9.0923	0	0	0	0	0	0	0	0	0	0	0	0.0262158	0.0194344	0	0	4.2321	0	4.13549	0.237719	3.58918	0.145126	0	2.5101	0	0	0	0	0	0	0	4.18133	8.5522	0	0	4.01547	0	0
hs603	0	4.23508	0	0	0	0	0	0	4.3019	0	0	4.06017	0	0	0	0	4.45559	0	0	0	0	4.08832	0	0	3.14464	0	0	8.32259	4.31695	4.21467	0	0	0	0	3.24574	0	0	0	0	0	0	0	0	4.54061	0	0.0132335	0	0	0
hs900	4.00729	0	0	0	0	0	0	0	0	0	0	0	4.59899	0	0	4.21062	4.45387	5.29362	0	0	0	0	0	0	0	0	0	0	0	0	4.08415	0	0.0197749	0	0.0250421	0	0	0	0	0	0	0	0	0	0	0	0	0	0.0251386
hs1327	9.36489	12.3538	0	0	0	0	0	0	0	0	0	1.48296	4.64782	0	4.48455	0	0.591639	0	4.00943	0	0	0.0169479	0	4.23441	0	0	0	0	0	0	2.0199	0	0	0	0	0	0	1.19862	0	0	0.881057	1.04201	0	0	3.80539	0	0	0	0
hs633	7.91175	2.71212	0	0.0437568	0.0898901	0	0	0	0	0.0177926	4.93181	0	0	0	0	0	3.95771	4.27003	1.17279	0	0	0	0	0	0.0639322	0	4.65561	8.89651	12.8199	8.35809	4.99442	0.0268924	4.44969	4.46298	0	0	4.81816	0	0	0	0	0	0	4.05012	0	0.0453472	0	0.0397346	3.93912
mm68	0	0.684024	0	0	0	0	0	0	0	0	0	0.861833	0	4.23015	0	0	0.0268338	0	0	0	0	0	0.0563477	0.452098	0	0	0	0	0	0	0	0.0102254	0	0	0.0136111	0	0	0.374591	1.08171	0	1.07908	0	0	0	0	0.0220323	0	0	0
hs273	0	0	0	0	0	0	0	0	3.64991	0	0	0	4.07831	0	0	0	0	4.75945	0	0	4.03152	0	0	9.23766	0.88994	0	4.55402	4.4168	4.55129	4.24109	0	0	0	0	4.22257	0	4.56067	4.01144	0	0	0	0	4.5157	0.497958	0	4.16813	0	0	0
hs272	0	4.10033	0	0	0	0	0	0	0	0	0	4.05306	0	4.44239	0	0	0	0	0	0	0	0	0	0	4.54975	0	0	0	0	0	0	0	0	0	0	4.72125	0	0	0	0	2.03607	4.33819	4.1891	5.70916	0	0	0	1.79351	0
mm881	4.49572	9.29964	0	1.71131	0.10355	4.45411	4.16877	4.59943	0.0269941	4.30381	0	5.84466	2.07655	1.95458	0	0	0	4.02045	0	0	4.43162	0	0	5.56242	2.73038	0	2.50831	0	4.01055	3.75588	8.75899	6.05373	3.34014	0	0.188964	0	8.37258	5.56424	0.285349	0	0.0589788	0	0	7.87417	0	0.0586819	0	0.322272	0
hs271	3.17558	0	0	0	0	0	0	0	0	0	5.00058	0	8.38667	4.68269	4.10237	0	5.00966	0	0	0	0	4.21325	0	2.23915	0	0	4.02091	2.80441	2.80441	4.13549	1.03203	1.40515	0.990993	0	0.0672786	0	0	4.35027	0	0	0	0	0	0	0	0	0	0	0
hs546	12.7033	8.52829	0	0	0.0747749	0	0	0	0	0	4.70098	0	0	0	0	0	0	4.48017	4.22621	0	3.98801	4.46033	0	3.15069	0	0	4.19192	4.7172	4.89228	4.7172	0	4.04001	5.62846	0	4.21238	4.29549	0	9.24764	4.31515	0	4.18243	2.39938	0	4.06854	0.089695	0	4.25571	3.65056	3.42903
hs1550	0	4.15567	0	0	2.63089	0	4.3866	0	0	0	0	4.41086	0	0	4.52824	3.36416	3.31203	0	0	3.11953	0	0	0	4.52038	5.09239	0	0	12.5636	10.1535	12.1281	1.93219	3.10292	8.64266	0	5.72236	0	4.65699	1.68035	4.05333	0	0	0	0	0	0	4.30355	0	1.85	1.98744
hs1172	0	5.23958	0	0	0	1.95632	2.86787	5.85979	0	9.19219	8.20969	0	4.49304	0	4.64589	1.40619	1.43183	0	0	0	4.78252	0	2.89289	8.46838	0	0	4.65365	4.29331	4.42042	8.63721	0.738837	0	0	0	4.80054	0.940451	0.554086	4.56225	0	0	0	0	0	9.25794	0	0	0	0	0
hs1060	4.04866	4.37818	0	0	0	0	0	0	8.51448	4.48812	5.69037	3.49593	0	2.09644	4.8516	0	0	4.23359	0	0	4.09044	2.66869	0.210894	0	0.0130522	4.48678	0	6.1657	6.12676	4.91691	0.0238773	0	3.83926	0	4.07572	0.0224927	4.48526	6.03321	4.88865	0	4.45223	4.23788	5.52926	0	0	3.85791	4.23423	5.14752	8.11541
hs1222	0	4.22297	0	0	0	0	0	0	3.12868	0	0	5.27003	0	4.05061	0	0	0	0	0	0	0	0	0	0	0	0	0	6.32953	0	0	0	0	0	0	0	0	0	0	0	0	0	3.2327	1.78161	0	0	0	0	0	0
hs1170	1.76617	1.57068	0	0	4.08249	0	0	0	8.33495	0	0	0.197816	0	0	0	0	0	0	0	4.93848	4.19075	0.0198778	0	9.19945	1.3647	0	0	0	0	0	0	0	4.36251	0	0	0	0.0550146	0	0	0	0	1.51351	4.07454	2.03783	0	0	0	0	0
hs1560	5.29196	0	0	3.79937	0	0	0	0	3.82955	0	0	0	0	0	0	0	0	0	7.8175	0	0	0	0	4.31375	0	0	0.176104	0	0	0	4.5997	4.66832	4.42604	0	4.35137	3.9101	0	4.85894	0.0291593	0	0.0306677	0	0.055429	4.39505	3.93151	4.21396	0	0.153588	8.29537
hs1146	0	0.012992	0	0	0	0	1.06544	0	0	0	4.18977	0	0	0	0.212715	4.00305	0	4.4784	0	0	1.04537	0.025863	0	5.27551	0	0.0104146	4.13253	0	0	0	0	0.028701	0	0	0.0666346	0	0	2.78716	4.28567	0	0	0	0.0778543	0	0	0	0	0	0
hs1049	0	0	0	0	4.27151	0	0	0	0	0	0	8.90026	0	0	0	0	0	0	0	0	0	0	0	0	0	0	7.4882	0	4.18243	0	5.68194	4.11862	0	0	0.0271634	0.0210999	4.10954	4.02736	0	0	4.16115	0	4.00656	0	0	0	0	0	0
hs1024	8.50186	4.82391	0	0	0	0	0	0	0	0	0	5.05948	3.333	0	4.15428	0	0	3.61707	4.14752	0	0	0	0	8.84704	0	0	5.05265	0	0	0	4.6073	9.17375	0	0	4.16956	4.36351	0.48641	13.0236	9.02353	0	4.27427	0	4.01011	0	0	4.03905	0	14.3269	4.28819
hs1153	0	0	0	0	0	0	0	0	0	0	0	0	4.10244	0	0	0	0	0	0	0	0	0	0	4.35556	0	0	0	0	0	0	0	1.46883	0	0	0.0625792	0	4.42251	4.17457	1.51456	0	0	4.55855	0	0	0	0	0	8.38837	4.38828
hs1079	4.48678	0	0	0	0	0	7.45405	0	0	0	2.00223	0	4.22695	0	0	0	0	0	0	3.30697	0	0	4.64207	4.33519	0	0	7.8689	0	0	0	4.18575	1.8297	0	0	7.23305	0	0	12.9667	3.49966	0	3.62661	2.4126	3.29309	0	0	0	0	4.78557	3.8436
hs1155	1.94804	4.22283	0	0	0	0	0	0	3.1993	0	0	0	0	0	4.81816	0	0	0	0	0	0	0	5.16115	0	0	0	4.25337	4.31112	4.31112	4.03545	0	0	0	0	0	0	0	0	0	0	0	0	0	4.00307	3.90253	6.34678	0	0	0
hs1039	4.21979	0	0	4.92445	4.45469	0	0	0	0	0	0	3.79064	0.734368	6.69997	0	0	4.48545	4.09745	4.1849	0	0	0	0	0	0	0	1.88365	0.0396552	0.0396552	0	0.148783	3.22649	4.09637	0.192435	0	4.03245	0.119109	5.91901	0	0	0	0	0	4.49779	4.59346	0	0	0	0
hs971	0	0	0	4.38381	0	0	0	0.0506155	0	0	4.11581	0	6.75748	0	0	0	0	0	0	0.132771	0	0	0	4.01954	0	0	0	4.26281	4.23657	0	0	4.06098	0.280888	0	0.382143	0.283616	0	0	0.0297114	0	1.48096	0	0	7.07357	0.0160787	0.808883	0.0380302	0.0292627	0.0370985
hs1109	4.60206	4.01189	4.15677	0	0	0	0	0	0	0	4.37854	0	0	0	0	0	0	0	0	0	0	0	0	0	0	0	0	4.11805	0	0	0	0	0	0	0	0	0	4.43652	0	0	0	0	3.76735	4.16813	0	4.90234	4.24473	4.24855	4.04478
hs1577	5.19516	0.118107	0	0	0	0	0	0	4.04994	0	0	4.364	0	0	0	0	0.0151643	0	0	0	0	0	0	0	9.91264	0	0	0	0	0	0	0	0.0281565	0	0	0	0	9.53235	4.17972	0	0.440732	0	2.9352	0	1.17554	0	0	4.78595	4.52414
hs1162	1.77268	0.0140391	4.12437	0	0	0	2.60625	0	0	0	0	0	1.627	0	0	0	3.87643	0	0	0	0	0	0	0	0	0	0	0	0	0	0.012384	0	0	0	0	0	0	0	0	0	0	3.23267	0	3.33294	0	0	0	0	0
hs557	0	0	0	0	4.09313	0	0	0	0	0	4.93554	0	0	0	0	0	0	0	0	0	0	0	8.36051	0	0	0	0	0	0	0	4.55596	4.72816	4.12436	0	0	0	0	0	0	0	0.545609	0	0	4.4698	0	0	0	0	0
hs1084	4.31069	1.22886	0	0	6.53611	0	0	0	0	0	0	0.209626	4.18379	0	0	0	0	0	0	0	4.08023	4.16537	0	4.50539	3.18455	0	0	4.24109	10.003	8.97905	15.3479	4.09258	7.15637	0	16.8861	0	3.73159	0.0770081	0	0	0	0	0	13.3176	0	4.24109	0	0	0
hs1034	0	0.0153511	2.40013	0	0	0	0.894082	0	0	0	0.293064	0.0814052	3.90707	0	0	0.306476	0.279292	0	0	0	0	4.27925	0	0	0	0	0	4.09313	0.146235	0.136357	6.33294	5.38651	5.88607	5.9487	0	8.10042	0	0.819227	1.67862	0	0	0	0	0	0	0	0	0.0143382	0
hs952	0	0	0	0	5.59346	0	0	0	4.97062	0	0	0	0	0	4.03858	4.06048	0	0	3.84468	0	0	4.74715	0	12.8972	5.2204	4.48678	5.02549	0	0	0	4.07883	0	0	0	4.05306	0	0	8.15379	0.138077	0	0.137917	0	0.133493	4.97062	0	0	0	4.17783	0.153281
hs806	0	4.51145	0	0	4.23284	0	0	0	2.89157	0	3.2547	0	0	3.5322	0	0	0	0	0	0	0	0	0	0	0	0	0	0	0	0	0.12989	0	0	0	0	0	0	9.64956	0	0	0	0	0	0	0	0	0	0	0
hs710	0	0	0	0	0	0	0	0	0	0	0	4.5544	0	0	0	0	0	0	0	0	0	0	0	6.13608	8.65883	0	4.11407	4.00524	12.8976	0	0	4.30627	0	0	0	0	4.45842	8.6073	0	0	0	0	0	0	0	0	0	4.12835	0
hs682	5.15428	0	0	0	4.05336	4.36064	0	0	0	0	4.61798	0	0	0	0	0	4.02	0	0	4.21935	0	0	0	8.81223	0	0	4.22695	0	0	0	0	0	0	0	0	0	0	4.43047	0	0	0	4.08714	0	0	0	0	0	0	0
hs1227	0	0	1.06676	0	0	0	4.00305	0	0	0	0	0	4.30005	0	0	0	0	0	0	0	0	3.02498	0	0	0	0	0	0	0	0	6.72962	2.73382	4.00043	0	0	0	0	0	0	0	0	0	0	2.59852	0	0	0	0	0
hs613	0	0	0	0	0	0	0	0	0	0	0	0.756466	0	0	0	0	0	0	0	0	0	0	0	0	0	0	0	0	0	0	0	0	0	0	0.0155384	0	0	4.87615	4.67572	0	4.22113	4.40561	0	0	4.00362	0.0170135	0	4.70553	5.03858
hs191	4.21896	0	0	0	0	0	4.47108	0	0	0	4.38091	0	0	4.26141	0	3.62992	0	0	0	0	0	0	0	4.25775	4.24853	0	0	0	0	0	8.85499	4.30944	7.19473	0	6.6581	3.23289	3.52815	5.06146	4.25928	4.26409	4.22208	4.89032	5.13831	0	3.41142	4.31515	4.5762	5.19031	5.22656
hs269	0	0	4.06148	0	0	0	0	0	0	0	0	0	0	4.00174	0	0	0	0	0	0	0	0	0	0	0	0	0	0	0	0	0	0	0	0	0	0	4.81248	0	0	0	0	0	0	0	0	0	0	0	0
hs982	0	0	0	0	0	0	0	0	0	0	4.23359	0	0	0	0	0	0.0160832	0	0	0	0	0	0	0	2.63268	0	0	0	0	0	4.44459	4.04694	4.7052	0	4.83565	0	0	4.28491	4.43982	0	0	0	0	0	0	0	0	0.016485	0
hs989	1.99237	0.0193295	0	0	0	0	4.11577	0	0	0	3.87415	0	0	0	0	0	0	0	0	0.137498	0.0478022	0.0482737	0	4.00131	0	0	0	0	1.90936	0	0.29641	0	0	0	0.290423	0	0	8.77485	4.27085	0	0	4.36903	0	1.76492	0	0	0	4.1129	0
hs789	0	2.59485	0	0	0	0	0	0	0	0	0	0	0	4.11667	0	0	0	0	0	0	0	0	0	4.45446	4.00833	0	0	0	0	0	0	0	0	0	0	0	0	5.29038	0	0	0	4.08831	0	0	0	8.30185	0	4.06651	0
hs503	0	0	0	0	4.61209	0	0	0	0	0	4.2318	0	4.22822	4.90846	0	0	0	0	0	0	0	0	0	4.43701	0	0	0	4.4168	8.39682	4.24109	4.46218	1.70029	0	4.52871	0	0	0	9.73526	0	0	0	2.57686	3.10154	4.08692	0	0	0	0	4.21325
hs429	0	8.88792	0	0	0	0	0	0	0	0	4.83863	0	0	4.0515	4.54342	0	0	0	0	0	0	0	0	0	8.21706	0	0	4.46852	9.34091	4.27654	0	6.02255	1.44702	0	4.04974	0	0.729829	0	0	0	0	0	0	4.36351	0	0	0	0	0
hs268	0	0	0	0	0	0	0	0	0	0	0	0	0	0	4.76447	0	4.11798	0	0	0	0	0	0	4.01951	0	0	0	0	4.07058	0	0	0	0	0	0	0	0	4.56736	0	0	0	0	0	0	0	0	0	4.08404	0
hs267	0	8.13101	0	0	4.30922	4.70553	16.9878	4.70333	0	5.20831	0	4.97469	4.23202	0	0	4.08132	0	0	0	0	4.59007	0	0	0	4.14086	0	4.74232	0	0	0	5.95466	4.25864	4.53313	0	4.05948	4.45842	4.15614	0	0	0	0	0	0	0	4.76955	0.807733	0	0	0
hs266	5.06651	4.55129	0	0	0	0	0	0	0	0	4.15739	0	0	0	0	0	0	0	0	0	0	0	0	8.56326	4.50585	0	1.38891	0	8.72199	0	0	8.84354	4.00966	0	0	0	0	0	0	0	4.14146	0	0	9.31332	0	0	0	0	0
hs853	5.93401	3.74851	4.18842	0	4.38068	4.09694	4.25819	4.05297	0	0	0	5.04818	5.17464	0	0	0	0	0	0	0	0	0	0	5.05306	4.52871	4.0757	8.82852	4.50952	4.47925	4.31228	4.10447	7.90142	2.62434	0	8.45522	0	7.33975	0	0	0	0	0	0	4.92781	0	4.38366	0	0	0
mm1334	0	4.07779	0	2.45576	0	0	0	0	0.0507554	4.1986	0.445378	8.579	0.628364	0.0370778	0	1.38656	3.94232	0	4.06937	0.998169	4.5986	0	0	0	2.28187	0	4.25058	0	0	0.164365	5.03254	3.83509	4.39863	0	4.80688	0	0	0.0782353	0.0294407	0	0	0.127586	0	4.00174	0	5.39794	0	2.49677	0
hs1432	0	2.77186	0	0	0	0	0	0	0.0429968	3.24498	0	5.51387	0	0	0	3.10535	3.17124	0	0	0	3.09006	0	0	4.41186	0	0	2.18312	0	0	0	1.87698	1.94065	0	0	0	0	0	0.722743	0	0	0	0	4.09798	0	4.10261	0	0	4.27143	4.74014
hs265	5.9914	8.83386	0	0	0.0766131	0	0	0	0	0	0	4.12507	4.56703	0	4.36369	4.16014	0	0	0	0	0.0395478	0.689944	0	0.605553	4.31515	0	4.37263	4.28316	0	4.13253	0	4.25995	4.43697	0	0.0601132	0	4.0345	4.42081	0	0	8.76497	0	4.09044	10.2231	0.614639	1.45773	0	4.59346	4.29328
hs264	29.6975	15.7425	0	0	0	0	0	0	0	0	4.01189	9.6392	4.40782	0	4.10182	4.42597	0	0	0	0	0	0	0	0	4.0847	0	0	9.21026	10.1478	8.91021	0	4.86604	4.15434	0	0.276431	0	0	4.18177	5.72987	5.02732	5.76056	3.8568	4.32229	17.6225	0	0	3.88301	4.09738	3.81811
hs1783	19.1428	9.16509	0	1.32613	0	1.17686	4.93512	0	0.134346	3.78778	2.92288	4.23433	0	0	0	4.06907	4.27954	0	0	2.5819	3.6486	2.05812	0	4.43288	4.79048	0	4.29262	8.48847	9.14353	4.41794	7.56185	6.91972	2.87467	0.606174	4.18	3.66755	3.58632	0.853826	4.47574	0	0.0565004	0	4.88606	17.0923	0	4.27031	0	0.136421	0
hs263	7.9877	18.434	0	0	0	0	0	0	0	0	7.33134	0	0	0	0	0	0	0	0	0	0	0	0	0	4.8729	0	0	4.08355	0	0	4.5182	0.138273	0.207057	4.27799	0.20482	0	0	0	0	0	0	0	0	0	0	0	0	0	0
hs172	4.0278	0.544114	0	0	0	0	0	0	0	0	2.77541	0	4.09151	4.2652	0	8.37196	4.054	0	0.110405	0	0	0	0	0.028133	9.39955	0	0	0	0	0	4.16558	0	0	0	0	4.13194	0	0	4.08513	0	0	0	0	4.4034	0	0	0	4.89522	0
hs262	22.2863	16.8499	0	0	0	4.057	0	0	0	0	5.37882	0	9.13251	0	0	4.07619	4.20524	0	0	0	0	0	0	0	8.20707	0	4.05355	12.9456	9.68027	11.3019	0	0	4.05799	0	0.274564	4.10292	0	0	0	0	4.11748	0	0	13.6145	4.37882	0	0	0	0
hs695	0	4.09474	0	0	0	0	4.9687	0	0	0	0	0	10.405	4.28377	4.5406	4.67402	0	0	1.12469	0	0	0	0	4.23284	0	0	0	4.05306	4.17328	0	5.69405	4.30364	4.69424	4.52322	4.66308	0	0	0	0	0	0	0	0	0	0.0329993	5.94318	0	0.483367	1.31531
mm5	0	2.72031	0	0	1.74303	0	0	0	0	0	0	0	0	0.531972	0	0	0	0	0	0	0	0	0	1.54021	0.0834254	0	0	0	0	0	0.0137567	0.0555638	0.253693	0	1.62983	0.262794	0	0.0792652	0.783379	1.03474	1.14727	0	0.40895	0.0337069	0	0.707719	0.305976	0.725468	0.357975
hs2057	0	0	0	0	0	0	2.24636	0	0	0	0	0	0	0	0	0	0	0	0.011959	0	0	0	0	0.255395	0	0	0.0124138	0	0	0	0	0	0	0	0	0	0	0.229306	5.84297	5.41842	5.21465	4.45764	4.41256	0	0.591662	0	4.19495	4.60023	4.24115
mm45	0	4.22551	0.125353	0	0.0778469	0	0	0	0	0	0.399577	0.638639	0.0324803	0	0	0	0	0	4.27279	0	0	0	0	0	0	0	5.1468	3.49668	3.48306	3.48306	0	0.0124036	0	0.0112598	0	0	0	11.5148	7.43157	3.00026	6.78039	2.81819	0	4.38195	0.0290769	0	0	7.69439	3.33588
hs1638	0	5.80536	0	0	0	0	0	0	1.38525	0	0	0.0954587	0	0	3.8987	0	0.0275943	0	0	3.10476	0	4.23336	3.99293	0	6.01592	0	0	4.05159	4.75365	4.71808	0	0.0402748	0	0	0	0	0	3.00616	0	0	0	0	0	0	0	4.19518	0	0	0
hs1820	0.0104265	0.346054	0	0	0.0580199	9.99059	5.43352	0	0	4.03433	0	0	4.34486	0	0	0	0	0	0	6.40223	4.65365	4.1152	4.72816	0.26483	4.28904	0	0.0525344	4.57515	0	3.5774	0.249034	0	0	0	0	0	4.72816	11.6602	5.48036	0	4.767	0.0589572	4.66555	0.0816509	2.44248	0	0	9.16444	4.58981
mm933	9.5251	4.00966	4.7233	3.23152	0	0	0	0	4.47129	0	0	0	4.30109	0	0	0	0	0	0	0	0	0	0	4.42899	0	0	0	0	0	0	4.07779	4.02641	0.0134139	0	0.0194771	0	0	4.76447	4.17587	0	0	0	0	0	0	0	0	4.51145	0
hs543	4.48541	1.2456	0	0	0	0	0	0	4.07584	0	4.21538	0	0	0	0	0	0	0	0	0	4.14874	0	0	0	1.15218	0	0	4.70774	4.40671	4.70774	9.09555	5.49255	8.25555	0	5.12511	0	0	4.29499	0	0	0	0	0	2.54169	0	0	0	8.40301	5.1203
hs1419	13.0301	0	0	0	0	0	0	0	0	0	0	0	0	0	0	0	0	0	0	0.573002	0	0	0	0	0	0	0	9.61962	9.07795	4.19111	0	0.312403	0	0	0	0	0	0.0541631	0	0	0	0	0	9.01991	0	0	0	3.96021	0
hs509	0	0	0	0	6.63985	0	5.37142	0	4.65933	0	0	0	0.189176	0	0	0	0	0	0	0	0	0	0	3.39546	0	0	4.04964	0	0	0	0	2.11496	3.36176	0	4.10753	0	0	0.0362075	0	0	0	4.37839	0	3.92905	0	0	0	0	0
hs586	10.3065	4.09313	0	0	0	4.44677	4.29073	0	0	0	0	0	0	0	0	0	0	0	0	4.47108	4.01523	0	4.28316	9.00548	0	0	8.25643	0	4.36653	0	0	0	0	0	0	4.68825	0	4.17393	8.6621	0	7.95374	0	4.70997	5.93181	0	0	4.02687	5.48399	9.15862
hs1321	8.43904	4.01547	0	0	11.4979	0	0	0	0	0	0	3.62426	8.19591	5.10397	0	0.053094	0.0534104	4.21112	0	0	0	0	4.50031	18.0787	0	0	4.02182	5.29757	4.56864	0	7.26639	7.95164	0.219048	0.217201	7.37859	0.17191	0	4.27775	0	0	0	0	0	0	0	0	0	4.24915	4.96858
hs1187	0.0188684	0	0	0	4.57187	0	1.57717	0	0	0	0	0	0.410689	0	0	1.654	0	0	0	1.41655	1.59823	0	0	0.0313537	0	0	7.74197	0.0138359	0	0	17.8015	5.17945	4.23328	0	8.78633	0	0	0	0	0	0	4.15428	7.88248	0.0170893	0	8.17047	0	8.26572	4.24642
hs215	0	0	0	0	0.0133512	0	0	0	0	0	0	4.00012	4.57675	0	0	0	3.38898	0	0	0	0	0	0	1.29864	4.39686	0	4.44035	0	3.43239	3.01839	8.73342	0	0	0	4.04777	0	4.08454	12.9512	4.1855	3.99923	4.67226	0	4.3138	0	2.05421	0	0	0.0260947	0
mm463	0	3.49852	0	0	0	0	0	0	0	0	0	0	3.74041	0	0	8.23246	8.49023	0	0	0	0	0	0	4.63167	0	0	0	2.93136	1.13435	0	0	0	0	0	0	0	0	4.36609	0	0	0	0	0	0	0	0	0	0	0
hs516	2.59861	3.6554	0	0	0.179087	0	0	0	0	0.0906724	5.16373	0.0255387	8.39151	0	0	0	0	0	0	0	0	0	0	0	4.28843	0	0	2.51115	2.61132	2.85086	0.0264771	0.0152354	0.0311356	0	6.22416	0	0	2.4907	0	0	0	4.06702	0	3.00834	0	0	4.29073	4.13524	0.978583
mm917	8.42084	3.10117	0	0	0	0.0135898	0.0117721	0.0159532	0	0.0141279	0	0	2.16367	0	0	3.04408	3.9197	0	0	0.0131744	0.0139759	1.93104	0.0120177	0	2.20181	0	0	4.67832	4.67832	4.37917	5.32305	1.04112	4.71572	0	5.63229	4.79277	0.657372	0	5.39816	0	4.12843	0	0	3.3717	0.0627103	2.66371	0	5.16589	4.01502
mm918	4.12001	3.98769	0	0	3.93872	0	0	0	0	0	0	0	0	0.128934	0	0	0	1.22255	0	0	0	0	0	6.28929	0.353753	0	0	0	0	0	3.73059	0.0109891	0.0222727	0	7.91503	0	0.0132655	0.572735	3.49014	0	0.0243779	0	0	4.06582	0	0.0100445	0	3.80908	4.10994
mm606	0	0	0	0	0	0	0	0	0	0	0	0.198142	0.189396	6.00446	4.25181	0	0	0	0	0	0	0	0	0	0	0	0	0	0	0	0	0	0	0	0	0	0	0	0	0	0	0	0	0	0	0	0	1.77959	0
hs2098	4.36856	1.64964	0	0	0	0	0.0111275	0	0	0	0.132534	0	4.14198	0	0.0267506	0	0	0.0173992	0	0	0	0	0	0	0.0354283	0	0	0.0193763	0	0	4.46338	3.70698	0.478538	0	0.355807	0	0.234912	0	0.246713	0.0360089	0.17249	0	0.0388929	0	0	0.530571	0	0.302487	0.19754
hs434	8.51506	0	0	0	0	0	0	0	0	0	0	0	0	0	0	0.0384532	0	4.27003	0	0	0	0	0	0	0	4.34294	0	8.4698	8.35809	0	0	0	0	0	4.2321	0	0	0	4.39254	0	0	0	0	4.39469	0	0	0	4.48149	5.56543
hs435	0	4.00789	0	0	0	0	0	0	0	0	0	0	4.39147	0	0	0	0	0	0	0	0	0	0	0	0	0	0	0	0	0	0	0	0	0	4.18062	0	0	0	0	0	0	0	0	0	0	0	0	0	0
hs1316	0.238652	5.3936	0	0	2.94541	0	0	0	0	0	0	0	0	0	0	0	2.59294	5	4.31754	0.0407682	0	0	0.0399732	0	0	0	0	0.156112	0.156112	0	6.4234	11.3975	5.06389	0	6.8651	1.24873	1.66461	3.41141	0	0	0	0	0	0	0	1.60138	0	6.52537	0.0425005
hs1387	0.0883141	0.0335648	0	0	0	0	0	0	0.0281073	0	0	0	2.92634	0	0.506828	0	0	0	0	0.677578	0	4.65839	0	0	2.52351	0	0	0.0904589	0.0982814	0.0929487	0	0	0	0	0	0	1.02604	0.0326917	0	0	0	0	0.0214703	0.110789	0.049907	0.415721	0	0	0
hs595	4.35853	0	0	0	0	0	0	0	5.09151	0	0	4.48149	0	0	0	0	0	0	0	0	0	0	0	0	0	0	4.82391	4.06854	4.41341	4.17134	9.17977	0	8.95764	2.04481	9.10431	0	0.0786323	0	0	0	0	0	0	4.2233	0	0	0	0	0.0306602
hs1500	0	4.33581	0.0586288	0	0	0.258402	0.103413	0.300036	0	0.325211	0	0.522438	0	0.0188529	0	0	0.0622194	0	0	0.118792	0.324679	0	0	4.48328	0.0278651	0	0	0	4.05785	4.06448	0	3.89638	0	0	4.2016	0	0	0.0352521	0.149288	0	0	0	0	0	0	0.0668219	0	0	0
mm413	0.280078	0.20342	0	0.0173551	0.175322	0	0	0	0	0	0	0.0481715	0	0.824849	0	0	0	0	0.0157653	0	0	0	0	1.11772	0	0	0	0	0.198569	0	0	0	0	0	0	0	0	0	0	0	0	0	0	0	0	0	0	0	0
hs1437	4.23136	8.32933	0	0	0	0	0	0	0	0	0	0.0383321	4.02411	0	4.25964	4.78781	5.22548	0	0	0.0602431	0	5.17468	0.0456468	0	0	0	0.0550788	0	4.09854	0	0	0.0371744	0	0	1.63675	0	0	0	4.08066	0	4.09366	0	0.08669	0	0	0	0	4.73725	0.0468459
hs319	8.2133	4.60206	0	0	0	0	0	0	0	0	0	0.629955	0.138219	0	4.37957	4.00789	0	0	0	0	4.42681	4.0804	4.32975	0	8.31469	0	0.813157	4.78781	5.27654	5.36051	0	0.753552	0.240492	0	0.257975	0.230333	4.31313	0.101312	3.3393	0	4.03143	3.59456	0	9.64127	0	0	3.44055	3.21379	3.37229
hs484	13.3309	26.1775	4.13906	0	0	0	0	0	0	0	0	0.0125015	9.24756	0	0	0	4.5376	0	0	0	0	0	0	0.0122018	17.651	0	0	9.36855	13.0616	8.73845	0	0.0407043	0	0	0	0	0	0.0210279	0.0339057	0	0.0109764	0	8.54916	4.41596	0	0	0	0.0674732	8.43135
mm414	4.37779	8.32373	0	0	0.360209	0	0	0	0	0	8.58341	4.07676	4.29795	0	0	0	0	0	4.03657	0	0	0	0	4.11238	0	0	0.506194	4.72354	4.69465	4.72354	3.07347	3.09784	2.89667	0	4.17295	0	0	7.46438	7.74469	0	4.04818	0	8.87337	0	4.20766	0.403946	0	6.75608	0.164883
hs795	4.09963	0	0	0	0.201664	0	0	0	0	0	0	0	0	0	4.25727	0	0	0	0	0	0	0	0	0	0	0	0	4.09745	4.0716	4.19928	4.46852	5.31247	4.87943	4.33255	5.37282	0	0	2.98457	5.05208	0	8.55903	0	0	0	0	0.258351	0	8.69385	8.37633
hs320	13.1709	8.62078	0	0	7.22222	0	0	0	0	0	4.41229	0	0	0	8.36694	0	0	0	0	0	0	0	0	0	4.2426	0	0.298457	4.08566	4.19928	0	4.21855	4.63027	4.24003	0	5.1689	0	0	6.89861	0	0	0	0	4.02411	0	0	4.88903	0	0	5.83566
hs1679	2.64415	6.07062	0	0	0	0	0	0	0	0	0	4.68621	8.27061	4.27629	3.23767	0.303379	0	0	0	0	0	0	0	5.7337	0	0	0.0266101	0	0.0377464	0	3.99905	1.36647	3.39288	0	4.10671	0	0	4.09528	4.29142	0	0	0	0.0605553	7.09843	0	4.49754	0	4.44139	0
hs321	0.877815	4.03152	7.34156	0	2.44316	0	0	0	0	0	0	0	0	0	0	0	0	0	0	0	0	0	0	4.30296	6.63945	0	0	0	4.80688	0	0	2.95712	0	0	8.24476	0	2.85705	0	0	0	0	0	6.19825	0.139866	0	0.0141381	0	0	4.36351
hs1678	5.30892	10.4264	0.211582	0	0.172961	0	0	0	0	0	4.14691	0	0.0663989	4.15739	4.09698	0	0	0	0.525782	0	0	0.188673	0	9.35351	4.35952	0	0.0307803	8.76302	8.65338	4.70997	0	1.09587	0	0	0	0	0	0.112814	2.58855	0	0.0709943	0.0720628	0	4.37469	0.384864	0.0552654	0	2.97353	0
hs1683	4.06651	5.166	0	0	0	0.104819	0.100482	0	0	0	4.04048	0	0	0	0.0331441	3.50601	0	4.77598	0	0.0971101	0.462722	4.26886	0.643944	0	5.39469	0	4.18013	0	0	0	0	6.83782	0	0	7.7351	0	4.37675	2.82595	4.23897	2.88687	3.37807	0	2.89128	0	0	0	0	7.32937	0.0202218
hs815	0	0	0	0	0	0	0	0	0	0	0	0	0	0	0	0	0	0	0	0	0.433692	2.30025	4.27726	2.41091	9.25707	0	8.66054	4.05306	0	0	0	4.04435	0	0	8.85836	0	0	4.07935	2.80811	0	0	0	3.24139	0	4.08126	0	0	3.14483	2.59711
hs748	0	0	0	0	3.52061	0	1.52285	0	0	0	0	4.69897	0.45013	0	0	0	0	0	0	0	0	0	0	0.0354528	4.02733	0	0	13.0814	9.42251	8.47525	0	5.68013	0	0	4.86504	0	0	0	0	0	4.0804	0	0	0	0	0	0	4.07212	4.0599
mm932	0	0	0	0	0	0	0	0	0.0323643	0	0.292858	0	4.82681	0	0	0	0	0.0557256	0	0	0	0.110171	0	5.93449	4.06413	0	2.41121	3.0392	0	0	0	0.0180531	0	0	0.0981672	0	0	3.33962	3.0268	0	3.11962	0	0	0	0	0	0	0.874181	0
mm415	0	0	0	0	0	0	0	0	0	0	4.24949	0	0	0	0	0	3.44267	0	0	0	0	0	0	4.30364	0	0	0	0	0	0	0	2.77323	0	0	1.49838	0	0	0	3.82888	0	0	0	0	0	0	0	0	1.89742	0.731753
mm416	0	4.58607	0	0	0	0	6.03158	8.38305	0	0	4.64589	0	0	0	0	5.01468	4.79812	0	4.00043	8.5874	0	0	0	0.0108898	0	0	0	0	0	0	0	0	4.00312	0	0	0	0	0.207089	0	0	0	0	4.38909	0	4.06449	0	0	0	0
mm417	4.29341	1.07608	0	0	0	0	0	0	0	0	0	4.15947	0.121284	0	0	0	0	0	0	0	0	4.07552	0	8.85138	2.50908	0	1.01642	0	0	0	0	0	0	0	0	0	0	0.167374	3.65682	0	3.16567	0	0	4.52724	0.631066	0	0	2.82068	1.26866
hs2223	4.23903	4.6925	0	0.692292	0	0	0	0	0.0332541	0.520701	3.21168	4.05897	0	0	0	0	0.284541	4.03292	0	0	0.5138	0	0.489518	0	1.9405	0	3.11946	4.39041	4.32883	0	0	0	0	0	2.92637	0	0	8.36849	0.0376287	0	0	0.0322002	3.27859	4.15366	0	0	0.0361101	0.036398	0.0354949
hs1974	4.18037	8.31496	0.0194772	0	0	0	0	0	0	0	2.61084	0.0104201	5.58569	1.86048	3.35939	0	0	0	0.0514556	0.0118427	0	0	0	0	0	0	0.297783	4.03221	2.83232	4.16115	0	0	0	0	2.39997	0.0236214	0	0.560292	0	0	0	0	0	0	0	0	0	0.045772	0
mm794	0	0.0219384	0	0	0	0	0	0	0	0	0	0	0.816346	0	0	0	0	0	0	0	0	0	0	0	2.0646	0	0	0	4.04191	4.74473	0.426186	0	0.411192	0	0	0	0	0.0111527	0.636335	3.65014	0.0617863	0	0.0647986	0	0	0	0	3.93641	0.024155
hs1491	4.74958	5.51961	0	0	0	0	0	0	0	0	0	0	0	0	0	0	0	0	0	0	0	4.38272	0	0	0	0	0	0	0	0	0	0	0	0	0	0	0	4.87829	0.0934251	0.0950973	0.101316	0.0200099	0	4.55309	0	0	0	0.109674	0.0918334
mm223	0	0	0.0222642	0	0	0	0	0	0	0	0.98606	0	0	0	0	0	0	0	0	0	0	0	0	0.0185252	1.86903	0	0	0	0	0	0	0.0826334	0	0	0.0119777	0	0	10.7474	7.5105	0	0	7.34076	3.74029	0	0	0	0	8.40131	3.3278
hs1767	0	0.621961	0.0132504	0	0	0.0129655	2.72254	0	0.208954	0	0	0.0181427	0.0182982	0.0188986	0	2.38483	0	0	1.17414	0	0	0	0	1.29831	0	0	0	0	0	0	0	0	0	0	0	0	3.782	2.59114	3.4396	0	3.99646	0	0	0	1.52368	0.116138	0	0.824174	0
hs1512	0	0	0	0	0	0.0260542	0	0	0	0	0	0.25023	0	2.96961	0	0	0	0	0	0	0	0	0	0	0.207658	0	0	0	0	0	0	1.32277	0	0	2.44621	0	0.0900507	2.06372	0.146682	0	0.163411	0.211475	0	0	0	0	0.197075	0.158347	0.172176
hs1472	0.0185175	0	0	0	0	0	3.01574	0	0.0327193	0	0.0569529	0.0205613	0.0392199	0	0	0	0	0	0	0	0	0	0	9.39112	0	0	0	0.0182891	0.0174221	0.0180236	0	0	4.18015	0	0	0	0	5.2347	0	0	0	4.52548	0	4.3363	3.65365	0	0	3.9727	4.20519
hs1436	4.51856	8.99	0	0	0	0	0	0	0	0	0	0	0	0	0	0.0246223	0.0179656	0	0	0	0	0	0	0.0379636	0	0	0	4.10024	4.19928	0	0	0	0	0	4.17099	0	0	0.0174769	0	0	0	0	0	0	0	0	0	0	4.23284
hs2179	0.963878	2.43368	2.81295	0	0.138661	0	0.0121306	0	0	0	0	0	3.88714	3.62205	0	0	0	0	0.0225609	0.736819	0.420473	0.410098	0	5.18682	1.41216	0	0.0175987	0.284197	0.267462	0	0	0.0162255	0	0	0	1.37665	0	2.51668	0	0	0	0	0.0772713	0.804274	0.155833	0	0	6.95813	0
hs318	5.73667	17.6758	5.10127	0	0	0	0	0	4.35262	0	0	0	0	0	0	0	2.46395	0	0	0	0	0	0	0	0	0	0	13.2084	12.8181	13.022	4.94098	4.72658	0	0	0	4.12055	0	0	4.39362	0	0	4.03703	0	8.64698	6.1296	0	0	1.07731	4.5817
hs753	13.2675	4.16073	0	0	0	0	0	0	0	0	0	0	0	0	0	0	0	0	0	3.79561	0	4.07469	0	0	0	0	0	0	4.49894	0	0.184748	0.365673	3.9377	0	1.5029	0	0	8.06462	4.22621	0	4.20551	0	3.35839	0	0	0.0180863	0	7.49085	3.0746
hs1151	0	0	3.88828	0	0	0	0	0	3.21655	0	0	4.17263	0	0.494145	0	0	0	0	0	0.0203106	0	2.55566	4.07727	0	0	2.23046	0	0	0	0	5.39721	0	0	0	0	0.1393	0.0249014	4.14448	9.57414	0	0	2.22387	8.87713	4.09593	2.98136	0	0	13.7526	0
mm384	0	0.0423012	0	0	5.2161	0	4.35067	0	0	4.20761	0	0	0	0.179321	0	0	0	0	0	0	0	0	0	2.04446	0	0	0	0	4.38195	4.26201	0	4.32001	0	0	4.20097	0	0	4.11351	4.57512	0	4.0942	0	5.20482	0	0	4.07904	0	4.67366	0.232623
hs1629	4.51856	0	0	0	1.7408	0.106323	0.116705	4.04721	3.30212	4.50724	4.32239	2.8791	4.01533	5.30213	4.03386	0	0	2.45591	0	0.0785274	4.67778	0	0	9.76467	0.249373	0	4.25414	0.112647	4.13668	0	4.45223	3.67707	0.0138099	0	6.83763	1.70996	1.73458	4.51667	0	0	0	0	1.95848	0	8.20545	0.0213661	0	0	0
mm385	0	0	0	0	0	0	0	0	0	0	7.79099	0	0	0	2.49393	0	0	0	0	0	0	0	0	0	0	0	0	0	0	0	0	4.09531	4.12317	0	0	4.87894	5.16842	5.28752	0	0	0	0	0	0	0	0	0	0	0
mm386	0	3.78847	0	0	4.71091	0	0	0	0	0	0	0.0256951	5.93607	0	0	0	0	0	4.57141	0	0	5.50459	0	0	4.01278	0	0	0	3.26642	0	0	4.11865	4.01182	0	3.45295	0	0	3.54842	0	0	0	0	0	4.58499	0	4.48812	0	0	0
hs2324	4.05849	14.0111	0.409555	3.76608	0	0	0	0	0	0	4.41908	0	4.17914	0	4.78516	0	0	0	0	0	0	0	0	0	4.74232	0	0	0	8.84201	0	0	0	4.10292	0	0	0	0	0.0325447	0	0	0	3.91924	0	0	0	0	0	2.52845	3.46112
hs1414	0	0	0	0	0	0	0	0	0	0	0	0	0	0.0353281	0	0	0	0	0	0	0	0	0	0	0	0	0	0	0	0	0	0	0	0	0	0	0	0	0	0	0	0	0	0	0	0	0	0	0
mm387	0	0	0	0	0	0	0	0	0	0	0	0	0	4.16052	0	0	0	0	0.608079	0	0	0	0	0	0	0	0	2.21351	1.92374	2.5004	4.17938	0	8.95492	0	4.46708	0	2.01914	4.08249	0	0	0	0	0	0	0	0	0	0	0
hs1579	4.57466	1.64382	0	0	5.39567	0	0	0	7.56789	0	0	0	0	4.52705	4.45812	0	4.84271	0	4.2369	0	0	0	0.0747626	3.69597	0	0	4.88106	8.64125	4.27598	0	4.09718	5.88861	6.45967	0	6.95122	0.0745753	0	4.77728	2.57256	0	5.77272	0	0	4.16453	4.28567	0	0	2.91606	3.85877
hs1150	5.01863	4.59517	0	0	0.0209559	0	0	0	0.0741248	0	0	4.14278	4.29636	0	4.33133	3.27996	3.03337	0	4.13925	0	0	0.0100335	0	5.18853	4.34486	0	3.97752	8.25718	14.0889	4.0048	6.73947	6.59596	8.57569	0	5.27692	0.0108525	2.27223	4.04567	3.51075	0	4.07831	0	0	4.65365	0	0	0	4.09355	4.24718
hs1218	0	0	0	0.0595682	0	0	0.0150441	0	0	0	0	0	0	0	0	0	0	0	4.02671	0.0157055	0	0	0	0	0	0	0	0	0	0	0	0	0	0	0	2.86944	3.03876	0	1.03278	0	4.01502	1.55814	0	0.120742	0	0	0	0.944909	0
hs1791	4.18323	4.08725	0	4.18575	0	0	0	0	4.62893	0	5.14684	0	0	0	0	4.6968	0	5.24499	4.24598	0.154461	2.59579	2.59422	0	8.37197	0	0	0	0	4.4828	0	4.08672	4.59563	4.62709	0	9.31469	0	0	4.07516	13.632	4.50613	13.373	3.99219	4.57623	0	4.13668	0	0.347925	4.30716	4.78516
hs1705	0	4.93902	0	0	0	0	0	0	0	0	0	0	0.0139545	1.10472	0.212158	0	0	0	0	0	0	0	0	0.0466042	0	0	0	0	0	0	0.319334	0.740718	0	0	0	0	0	2.69808	0	0	0	0	0	0.0269234	0.0512376	0.0283744	0	3.68239	2.73025
hs2153	3.57852	4.6417	2.61645	0	0	1.26176	0	1.29673	3.97449	0	0	0	0	0	0	0	0.0104222	0	0	1.09624	1.51813	0	0.881508	4.97816	0.0642109	0	0	0	0	0	0.0342055	0.109332	0	0	0.109406	0	0	0.0806686	4.49349	0	4.0278	4.36351	5.19928	2.3999	0	0.0102157	0	4.61979	0
hs1670	0	0	0	0	0	0	0	0	0.166501	0	0	0	0	0	0	0	0	0	0	0	0.0620489	0	0	0	0	0	0	2.54768	0.115781	0	1.52953	4.08387	0	0	0.225833	0	0	0.244267	0	0	0	0	0	0	0.134826	0.556176	0	0.0153104	0
hs2330	0	0	0	0	0	0	0	0	0	0	0	0	0.0426423	0	0	0	0	0	0	0	0	0	0	0	0	0	0	0	0	0	0	0	0.0184917	0.0105795	0.0203656	0	0	0	0	0	0	0	0	0	0	0	0	0	0
mm1122	0	0.0386632	0	0	0	0	0	0	0	0	0	0.776764	0.0914248	0.0276225	0	0	0	0	0	0	0	0	0	0.956876	0	0	0.0129584	0.391842	0.391842	0.469449	0.172455	0.017134	0.0307614	0	0.0330899	0.0228178	0.190731	0.0589622	0.448452	0	0.0542417	0.0378772	0.0410359	0	0.710255	0	0.0444447	1.84705	0.0435469
mm7	0.0700644	0	0	0	0	0	0	0	0	0	0	0	0	0	0	0	0	0	0	0	0	0	0	0	2.28433	0	0	0	0	0	0	0	0	0	0	0	0.313372	3.44825	0	0	0	0	0	0.131148	0	0	0	0	0
mm244	0	0	0	0	0.130034	0	0	0	0	0	0	0	0	0	0	0	0	0	0	0	0	0	0	0	0	0	0	0	0	0	0	0	0.0172331	0	0.0301859	0	0	0	0	0	0	0	0	0.0220553	3.70134	0	0	0.711463	0
hs508	0	0	0	0	0	0	0	0	0	0	0	0	0	0	0	0	0	0	0	0	0	0	0	0	0	0	0	0	0	0	0	0	0	0	0	0	0	0	0	0	0	0	0	0	0	0	0	0	0
mm245	0	0.471568	0	0	0	0	0	0	0	0	0	0	0	0.0150875	0	0	0	0	0	0.0872501	0	3.43903	0.125167	0	0	0	0	0	0	0	0	0.0417562	0	0	0	0	0	2.23643	0.477134	0	0	0.554112	0.482284	0	0	0.0738889	0	0.626349	0
hs1329	3.36267	0	3.21062	0	0	0.0237722	0.0239981	0	0	0	0	0	0	0	0	0	0	0	0	0.0198402	0	0	0.0687096	0	0	0	0	0	0	0	0	0	0	0	0	0	0	4.60502	0	0	0.0357595	0	3.8763	0	0	0	0	0	0
hs1741	0	0	0	0	0	0	0	0	0.115204	0	0	0	0	0.101483	0	0	0	0	0	0	0	0	0	1.91858	0	0	0.81466	0	0	0	0	0	0	0	0	0	0	2.54487	3.07094	0	4.29678	0	0	0	0	0	0	2.53921	0
hs231	4.16304	0	0	0	0	0	0	0	0	0	4.58109	0.0449822	4.31966	0	0	0	4.09283	4.27003	0	0	0	0	0	5.01055	4.30364	0	0	4.70997	4.70997	4.40894	6.04244	8.67291	6.62914	4.68778	7.78229	4.17884	0	0	4.39041	0	4.84771	7.08355	6.56008	4.54741	0.582213	1.34478	0	3.93966	4.30103
hs781	0	10.1217	0	0	0	0	0	0	0	0	0	0	4.11612	3.30653	0	0	0	0	0	0	0	0	0	0	3.76179	0	0	9.50955	8.93737	9.08106	4.13695	4.80762	0.17373	0	4.46054	0	0	0	0	0	0	5.11574	0	4.23079	0	0	0	0	0
hs782	0	5.24692	0	0	4.01854	0	0	0	0	0	0	0	4.96492	4.30715	0	0	0	0	0	0	0	0	0	0	0.0118935	0	0	0	0	0	0	8.68545	0	0	4.36759	0	0	3.95986	0	0	0	0	3.64322	0	0	0	0	0	1.02777
hs783	4.62341	0	0	0	0.0218475	0	0	0	0	0	0	4.09502	5.36591	1.66347	4.60022	0	0	0	0	0	0	0	0.11274	4.10347	0	0	0	4.14182	0.0172476	0.0276804	3.34059	0	0	0	0	0	0	6.70466	0	0	0	0	0	4.19513	0	8.69162	0	0	0
mm1341	0.208659	0.496052	0	0.0532128	0	0	0	0	2.07791	0	2.09741	0	2.24151	0	0	0.0775969	0.0926604	0.031523	0.690196	0	0	0	0	0	1.55716	0	0.0994855	0	0	0	2.63235	0.0145069	2.82934	0	3.47131	0	0.0274623	2.37984	3.29528	0	2.8086	0.547681	1.34575	0	0	1.20466	0.534252	3.85408	2.55522
hs1393	0	0.033929	2.14029	0	0	0	0	0	4.33255	0	0	2.97264	5.02373	0	0	8.06599	7.80916	0.935755	0	0	0	0	0	6.70121	0	0	2.72552	0	0	0	0	3.13469	0.0753697	0	4.14018	0	0	4.12321	0	0	3.61746	3.96722	0	0	0	0	0	0	2.26619
hs614	4.05453	0	0	0	0	0	0.0859136	4.21254	0	5.48017	0	0	0	0	0	0	0	0	0	0	9.88035	4.65365	0	0	0.109758	0	0	0	0	0	4.37161	0	4.19928	0	0	4.23359	0	4.07542	0	0	0	0	0	0	0.119884	0	0	0	0
hs874	0	0	0	0	0	0	0	0	1.719	0	0	0	0	0	0	0	0	0	0	0	2.49258	2.28138	0.433103	0	0	0	0	0	4.06198	0	2.3421	0	0	0	0	0	0	4.30627	0	0	4.05012	0	0	4.01954	4.19246	0	0	0	0
hs881	4.21824	0	0	0	0	0	0	0	4.1343	0	0	0	0	0	4.8236	0	0	0	0	0	0	0	0	0	0	0	0	0	4.11407	0	4.12389	0	5.09251	4.20944	4.05425	0	0	7.78183	0	0	0	4.11634	0	4.72125	0	0	0	0	0
hs575	0	0	0	0	3.35716	0	0	0	0	0	0	0	0	0	0	0	0	0	4.17783	0	4.03409	0	5.14801	4.20554	8.93287	0	4.30193	0	0	0	2.88215	8.26792	0	0	4.19314	4.20412	0	4.89179	0	0	0	0.354777	0	0	0	0	0	0	0
hs126	0	0	0	0	0	0	0	0	4.06248	0	0	0	4.46471	8.1791	0	0	0	0	0	0	0	0	0	4.8889	0	0	0	5.01189	4.18509	4.36856	0	0	4.25337	0	0.0174743	0	4.21903	0	0	0	4.43553	0	0	0	0	0	0	4.10019	0
hs540	4.21254	4.07058	0	0	0	0.0403974	0.0484398	0.0450388	0	0.0438067	0	0	0	0	0.0189812	0	0	0	4.05159	0	0.0441864	0	0	0	8.41121	0	0.0187445	0	4.74473	0	0	0	0	0	0	0	0	3.54076	0	0	0	2.22573	0	0	4.18221	0.0835637	0	4.0716	0
hs882	0	0	4.2936	0	0	0	4.23657	0	0	0	0	0	0	4.82406	0	4.5986	4.383	0	0	0	0	0	0	4.69943	0	0	9.83301	0	0	0	3.36385	0	0	0	4.17957	0	0	0	0	0	0	0	0	0	0	0	0	0	4.43007
hs128	4.19586	4.02549	0	0	0	0	0	0	7.51586	0	4.27737	0	9.50154	4.56272	0	0	4.23882	0	8.32179	0	0	6.20677	0	2.96547	18.2175	0	0	0	8.62263	0	4.33193	0	4.53985	0	0	0	0	0	5.68825	4.56225	5.12494	4.1707	3.99255	0	0	3.96088	0	4.64975	8.27521
hs129	9.56211	0	0	0	0	0	0	0	0	0	0	0	0	0	4.16749	0	0	0	0	0	0	0	0	0	0	0	0	0	4.39041	0	0	0	0	0	0	0	0	0	0	0	0	0	4.26922	5.67985	0	0	0	0	0
hs136	8.78033	4.27245	0	0	2.90666	0	0	0	0	0	0	0	0	1.99895	0	0	6.34486	0	0	0	0	4.41636	0	17.167	0.16363	2.61247	4.87816	4.05306	4.0575	0	0.0356464	0.0170457	0.601735	0	0.0308278	0.674593	0.628691	2.9032	0	0	0	0	0	4.0511	0	0	0	3.12453	0
hs339	4.52433	0	0	0	0	0	0	0	0	0	0	0	0	0	0	0	0	0	0	0	0	0	0	0	0	0	0	0	4.18709	0	0	0	0	0	0	0	0	0	4.04287	0	0	0	0	0	0	0	0	0	0
hs182	5.22113	0	0	0	4.63078	0	0	0	0	0	0	0	0	0	0	0	0	0	0	0	0	0	0	4.05353	0	0	0	0	0	0	0	0	0	0	0	0	0	15.9863	0	0	0	0	4.18376	4.42366	0	0	0	0	4.37366
hs137	0	4.36351	0	0	4.6616	0	0	0	0	2.58106	3.00648	3.24566	0	4.16629	0	0	0	0.338258	0	0	4.10194	0	0	4.18244	4.08656	0	4.33068	0	0	0	4.15304	0	0	1.55685	0	2.27317	0	10.3488	0	0	0	0	0	4.48812	2.44565	0	0	0.101202	4.14448
hs619	0	0	0	0	0	0	0	0	0	4.46856	0	0	1.75498	0	0	0	2.00159	1.19751	0	0	0	0	0	5.69111	4.00339	0	0	0	0	0	0	4.16285	0	0	0	0	0	12.5595	0	0	4.01547	0	0	0	0	0	0	0	0
hs188	0	7.50757	0	0	0	0	0	0	0	0	0.10213	0	1.18731	0.0514491	4.13824	0.19722	0	2.1991	0	0	0.0464284	0	0	0	4.47496	0	0	0.226921	0.212005	0	0	0	0	0	0	0	0.213355	4.3851	4.05208	0	0	1.62076	0	0	0	0	0	0	0
hs138	8.65906	0	0	0	0	0	4.15481	0	0	0.0786532	0	0	0	0	0	4.93181	12.5683	7.88791	0.0178768	0	0	4.16813	0.0757361	4.21896	0	0	0	0	0	0	6.38776	7.4172	6.51011	0	4.07366	4.26656	4.29158	9.21014	4.78969	0	0	4.03433	0.199049	4.16813	0	0	0	4.10073	4.44855
hs432	1.01604	0	0	0	0	0	0	0	0	0	0	0	0	0	0	0	0.0418048	0	0	0	0.0177324	0.0216333	4.15058	0	0	0	0	0	0	0	0	0	0	0	0	0	0	0.148864	0	0	0	0	0	0	0	0	0	0	0
hs140	4.34486	4.70115	0	0	0	0	0	0	0	0	0	3.01475	4.38722	0	0	0.495092	0	0	0	0	0	1.61171	0	0	2.66682	0	3.82516	0	4.13847	0	0	0	0	0	0	0	0	5.09963	0	0	4.05552	0	4.13787	4.44855	0	5.2652	0	4.54061	4.03858
hs747	0	0	4.1349	0	0	0	0	0	0	0	0	0	0	0	9.44141	4.0278	0	5.42366	0	0	0	0	4.12494	0	4.47756	0	0	0	0	0	0	1.85725	5.60849	0	0	0	0	8.59515	8.25505	0	0	4.00745	0	0	0	0.524398	0	4.54821	0
hs131	4.12668	4.41341	0	0	4.10889	0	0	0	0	0	0	8.22855	0	0	0	3.79386	0	4.11182	0	0	0	0	4.29243	3.82578	3.69454	0	4.51726	0	4.0575	4.02503	1.47427	4.06148	1.38717	0	0.768045	0.974385	1.07245	0	9.34754	4.57431	4.39362	8.4327	4.62524	0	1.53163	6.7908	4.37882	9.44203	4.45469
hs176	4.07058	5.00656	0	0	4.23037	0	0	0	0	0	0	4.01011	4.74232	0	0	0	0	0	0	0	2.89459	0	0	0	0.0406089	0	0.341362	4.28233	4.19586	0	4.45842	0	4.66959	0	0	0	0	3.16918	4.75945	4.00174	4.37059	4.62893	4.48945	7.7197	0	0	4.54668	5.3439	4.74715
hs141	4.82709	0	0	0	0	0	0	0	0	0	5.3019	0	0	0	0	0	0	0	0	0	0	0	0	0	4.17404	0	4.36351	4.19856	4.19856	4.07616	0	0.0100409	0	0	0	4.41341	0	0	5.80248	4.24728	4.26661	4.44862	4.49412	3.94036	4.2233	0	4.46576	5.0045	4.54849
hs132	0	4.70115	0	0	0	5.18013	8.54058	4.49349	0	4.24795	0	0	4.30863	0	0	8.83253	4.72354	4	0	0	4.55129	0	0	9.21598	4.96257	0	14.1152	0	4.15615	0	0	0	0	0	0	0	0	4.3655	0	0	0	0	0	4.06702	0	5.17653	0	0	0
hs133	0	0	0	0	4.16749	0	0	0	4.24489	0	0	0	0	0	0	0	0	0	0	0	0	0	0	0	0	0	0	0	0	0	4.67162	4.10073	5.02411	0	4.95078	0	0	0	0	0	0	4.19928	4.13727	0	0	0	0	4.0013	0
hs134	0	0	0	0	0	0	0	0	0	0	3.95431	4.41454	0	0	0	0	0	0	0	0	0	0	0	0	4.02842	0	0	4.07676	0	0	0	4.42908	0	0	0	0	0	0.0185607	0	0	0	3.25944	0	0	0	0	0	1.16515	0
hs142	4.25055	0.17392	0	0	4.05948	3.297	7.91931	3.08448	4.31069	4.06549	3.74484	0.175961	0	0	0	0	0	0	0	4.27984	4.0013	0.112362	4.94279	1.93452	4.27168	0	0	4.71897	4.71897	4.4168	0	4.51423	6.27877	0	6.68503	4.32863	4.10671	9.29963	2.15694	1.97845	2.20605	7.38868	3.92484	0	0.187888	0	2.17669	6.10895	1.91315
hs143	5.0804	4.50169	0	0	4.03621	4.34851	4.46609	0.0151694	0	4.4908	0	0	3.02953	0	0	0	0	0	0	0.0126757	4.95468	0	4.83402	0	0	0	4.20482	0	4.02503	0	9.22188	8.82323	4.65365	0	5.75945	3.21568	0	0.812458	3.71912	0	0	0	0	9.39985	0	0.31714	0	3.85636	4.70774
hs135	0	0	0	0	0	0	0	0	0	0	0	0	0	0	0	0	0	0	0	0	0	0	0	0	0	0	2.58864	0	0	0	0	0	0	0	0	4.06098	0	4.10239	8.74608	0	0	4.0227	4.00218	0	0	0	4.58503	9.14557	4.31336
hs144	4.12627	4.10275	0.464595	5.12013	0	0	0	0	0.394463	0	0	0	0	8.27624	0	0	0	0	4.52735	0	0	0	4.72576	9.47495	3.3661	0	0	0.254827	5.26927	0	0	0.279119	0	0	0	0	0	2.25837	4.71822	0	4.53915	0	0	0	4.48045	0	0.0169032	4.31055	0.0170249
hs1394	0	0	0	0	0	0	0	0	0	0	0	0.0645072	0	0	0	0.0238119	0.0301478	0.0382177	0	0	0	0	0	0	0	0	0	0	0	0	4.13721	3.94351	0	0	0	0	0	0	0.971693	0	0	0	0	0	4.05647	0	0	1.09184	0
hs715	4.3011	3.85501	0	0	0	0	3.92542	0	0	4.06145	0	0	4.45717	0	0	4.18977	0	4.44977	0	0	0	0	4.98514	0	4.30196	0	0	0	0	0	0	4.74135	0	0	4.1487	0	0	0	0	0	0	0	0	4.34679	0	2.51697	0	8.9279	4.15552
hs915	5.43063	0	4.057	0	0	0	4.14874	0	0.0688165	0	0	0	0	0	0	0	0	0	0	0	0	0	0	1.57885	0	0	4.20273	8.61201	4.11222	0	0	4.35067	0	0	0	0	0	0	0	0	0	0	4.21968	4.69465	0	0	0	0	0
hs823	9.25706	0	0	0	0	0	0.0437201	0	0	0.0577348	0	0	0.670488	0	0	4.4318	4.75945	0	0	4.19956	0.0552621	0	0	0	0	0	4.64975	4.71897	8.93222	4.4168	0	0	4.48476	0	0	0	0	5.18598	4.48911	0	4.29638	0	0	4.22185	0	0	0	4.04099	0
hs1471	4.21042	0.0138999	0.118342	0	0	0	0	0	0	0	0	1.53092	0	2.42692	0	0	0	0	0	0	0	0	0	0	1.02169	0	0.0517687	4.03487	4.29671	4.05159	0.0382222	0.0109345	2.43432	0	0	2.63868	3.68257	0.0587365	2.35255	0	0	0	0	4.50724	0.0124394	0	0	2.52385	0.0971352
hs796	0	4.2253	0	0	0	0	0	0	0	0	5.20412	5.09691	0	0	0	0	0	0	0	0	0	0	0	0	2.71812	0	0	0	0	0	5.75	6.73868	6.11677	0	6.69883	0	0	0	0.0148704	0	0	0	0	0	0	0	4.17914	4.4482	0
hs488	4.54975	14.797	0	0	0	0	0	0	0	0	0	0	6.41653	4.20343	0	0	0	11.5358	0	0	0	0	0	0	0	0	0	8.55646	9.72172	9.01297	0.0247462	0.760039	0	0	0.0150412	0	0	0	0	0	0	0	0	5.14935	0	5.12784	0	0.0912507	0.387286
hs341	8.22335	3.49004	0	0	4.08206	0	0	0	0	0	0	9.11259	4.64782	0	0	0	0	0	0	0	0	0	4.68526	4.64397	4.09909	4.05012	3.32108	0	0	0	4.13549	0	4.27085	0	0	0	0	9.32988	2.40932	0	0	0	0	0	0	0	0	2.85862	2.54245
hs1444	4.09205	0.708873	2.03816	0	0.0188715	0	0	0	6.67643	0	0	7.30809	0.186871	5.60033	0	0.0452768	0	0	0	0	0	0	0	4.86646	4.71897	0	4.24245	0.0141775	4.10292	0	0.0464682	0.0591988	0.0433683	0.0479527	0.96563	2.82258	0.434818	1.75493	8.05535	0	7.87525	0	4.86646	4.24795	0	0	0	8.51449	4.57512
hs1763	0.941298	1.69165	0	0	0	0.0798691	0.0809633	0.0533832	0	0	0.0156871	0.0716957	0.0309045	0	0.0769072	0	0	0	0	0.0893152	0.015198	0	0.0696538	0.0562235	1.42083	0	0	0	0.0827197	0	0.0663367	0.0721826	0.0371433	0	0	0.0372953	0	0.129511	0.0335999	0	0.0608457	0	0	0.103216	0.0218886	0	0	2.54003	0
mm13	0	1.95232	0	0.599154	0.0156209	0	1.5984	0	3.58537	2.53076	1.98799	4.4828	0	0	0	1.09943	0.1146	0.0491657	0	0.0357435	0.250529	0.311745	0	0	0	0	1.01767	0	0	0	2.31339	0	2.86804	0	0.0161038	3.2498	0.368713	0.0427304	3.96172	0	1.91912	4.1123	0	4.67133	1.0133	0.126863	0	3.18882	4.00524
hs1513	0	0	0	0	0	0	0	0	0	0	0	1.40256	0	0	0	0	0	0	0	0	0.1384	0.130379	0	0	0	0	0	0	0	0	0	0	0	0	0	0	0	0.677065	1.71664	0	0.90292	0	0.0205901	0	0.114073	0	0	1.94519	1.65564
mm1400	5.04688	0	0	0	0	0	0	0	0	0	0	0.0129578	0	0.0579618	0	0	0	0	0	0	0	0	0	0	3.70838	0	0	0	4.08651	0	1.19707	0	0	0	1.34595	0	0	0	0.289818	0	0.0261851	0	0	4.92846	0.171845	0	0	0.969373	0
hs908	4.49015	5.89132	0	0	0.0135386	0	0	0	0	0	0	0	0.225951	0	0	0	0	0	0	0	0	0	0	0	0	0	0	0	0.0950167	0	0	0	0	0	4.3004	0	0	1.34908	0	0	0	0	0	0.088591	0	0	0	0.0283307	0
mm703	0	0.0142099	0	0	0	0	0.0294024	0	0	0	0	0	0.186054	0	0	0	0	0	0	0	0	0	0	0	0	0	1.27043	0	0	0	0	4.61979	4.31966	0	0	0	0	8.58919	0.0131262	0	0	4.09259	0.0559016	0	1.55668	4.21824	0	0.0516374	0.0293243
hs909	4.82653	0.0761964	0	0	0.173558	4.33156	4.18084	4.59287	3.72716	4.19308	0	0	0	0.61227	0	0	0	0	0	0.0181148	12.5	4.11126	0.0484054	9.78952	1.86548	0	0	0	0	0	0.149978	0.687447	0	0	0.180819	0	0	4.02024	0	0	0	0	4.40264	0	0	4.45213	0	0	0
mm31	0	4.957	1.70851	0	0	0	0	0	0	0	0.225612	5.75435	0.440019	0	0	0	0.0254691	0.029588	0	0	0	0	0	0.0625817	1.00626	0	0	0	0	0	0	0.0631533	0.104837	0	0	0	0	1.35565	0.0104274	0	0	0	4.0452	0.0513811	0.297024	0.283123	0	1.42708	0
hs648	0	0	4.59176	0	0	0	0	0	0	0	0	4.43533	0	0	0	0	0	0	0	0	0	4.0752	0	9.61896	4.57789	0	0	0	0	0	14.0136	4.04602	4.39041	0	4.10237	0	0	8.42194	8.94341	0	9.03921	4.13253	4.03386	0	0	0	4.29414	8.80796	8.67832
hs425	4.25885	9.45896	0	0	4.53642	0	0	0	0	0	0	5.21549	0	4.66947	0	0	0	0	0	0	4.01457	0	0	8.7181	0	0	4.46471	4.065	4.77989	0	12.7602	8.53687	8.71563	0	4.4275	5.15304	5.68602	11.1443	4.25068	4.7876	4.7312	3.68004	3.66982	4.50031	0	0.0158633	3.64748	5.08606	3.68449
hs804	4.07027	4.16661	0	0	0	0.191319	0.199496	0	0	0.184517	0	8.76307	4.17653	0	0	0	3.21253	0	0	0	0	0	0.230837	0.0137804	0	0	0	4.70774	4.47	4.70774	0	0	0	0	0	0	0	0.115404	4.27003	0	4.35262	0	0	0	0	0.885584	0.631014	4.72032	0
hs195	0	4.17906	0	0	0	0	0	0	4.01412	0	0	0.0116408	3.66881	0	0	0	0	0	0	0	0	0	0	0	0	0	0	0	0	0	8.35989	0	4.10182	0	12.5153	1.39124	0	5.37059	0	0	0	0	4.9393	0	0	0	0	0.0196052	0.0108684
hs1800	3.94335	4.02679	0	0	8.84828	0	4.14267	0	0	0	0	4.33857	8.21617	6.36362	0	10.0418	0	0	3.49797	0	0	0	0	4.21254	7.66642	0	0	4.67296	3.43495	4.1766	9.84503	5.45779	9.42663	0	10.1415	8.83383	0	4.1986	8.20394	0	7.44284	0	2.72131	3.6941	3.56483	6.2004	0	8.51027	4.33269
hs768	0	4.37161	0	0	4.27491	0	0	0	0	0	4.64016	0	3.7783	0	0	0	0	4.85078	0	0	0	0	0	0	0	0	0	0	0	0	0	0	0	0	0	0	0	4.43771	0	0	0	0	0	0	0	0	0	0	0
hs716	4.10403	0	0	0	0	0	7.11541	3.97448	4.43771	3.9816	0	0	0	0	0	4.06148	8.84169	0	0	0	3.83154	0	0	4.12901	0	0	3.99407	0	0	4.29671	4.41908	8.78413	4.59176	0	8.98622	0	0	4.35813	0.534856	0	0.516443	0	0	4.16813	0	0	0	0.739148	4.0575
hs919	0.568806	4.06035	0	0	0.0124143	4.01547	4.79519	0	4.04287	0	0	12.6284	0	0	4.00904	0	0	0	0	4.39147	0	0	4.00087	0	13.0241	0	0.215972	0	0	0	3.4384	0	3.24362	0	0.0114872	0.0131907	0.0179465	0	4.69897	0	4.15989	0	4.85078	0	0	0	4.08513	5.95821	5.04528
mm2	0	0	0	0	0	0	0.0120229	0	0.0254634	0	0	0	0	0	0	1.42253	0	0	0	0	0	0	0	0	4.42689	0	0	0	0	0	0	0	0	0	0	0	0	0	0.0703712	0	0	0.0541267	0	0	0.0429788	0.015842	0	2.4725	0.0752481
hs1482	0	0	0	0	0	0	0	0	0	0	4.01594	0.0605244	0	0	0	0	0	0	0	0	0	0	0	4.2909	0	0	0	0	0	0	0	0	0.0122633	0	0	0.0190288	0.0110368	4.02595	0	0	0.0553089	4.24264	0	0	0	0	0	0	0
mm642	0	4.70348	0	0	0	0	0	0	0	0	0	0	0	3.44275	0	0	0	0	0	0	0	0	0	0	0	0	0	0	0.177744	0	0	0	0	0	0	0.029236	0	0	0.134473	0	0	0	0	0	0	0.0197487	0	0.349667	0
mm641	0	0.0395244	0.0177647	0	0	0	0	0	4.29042	0	0	0.222243	0.0176716	0	0	0	0	0	0	0	0	0	0	4.54028	0	0	3.20013	4.43333	3.95211	4.24287	0	0	0	0	0	0	0	0	0	0	0	2.93178	0	0	0	0	0	1.83143	0
mm457	5.45787	0	0	0	0	3.59736	3.82689	3.62093	0	4.01251	0	0	0	0	0.0134443	0	0	0	0	0	3.71261	1.81184	0	0	0	4.34294	0	3.94229	3.27223	4.51805	0.0835285	0	0.0819602	0	0	0	4.44491	5.97121	0	0	4.1831	3.22815	0	3.95655	0	0	0	3.87204	0
hs1877	4.4168	3.43234	0	0	0	0	0	0	1.49993	0	0	0	0	0	4.25011	0	0	0	0	0	0	0	0	0	0	0	0	8.25647	0	0	0	0	0	0	0	0	0	0	8.75421	0	4.36552	0	6.6216	0	0	1.47504	0	4.04144	4.1549
mm73	1.17429	0	0	0	0	0	0	0	0	0	0	0	0	0	0	0.0118732	0.0122882	0	0	0	0	0.0155026	0	0	0	0	0	0	1.47899	0	3.26977	0.0207111	0	0	0.0309097	0	0.0222224	0	0.956084	0	0.94377	0.966377	0.881041	1.42628	0	0	0.905656	1.10744	0.936093
mm458	5.36452	0.0161595	0	0	0.0113032	0	0	0	0.0100038	0	0	0	4.17198	0	0	0	0	0	0	0	0	0	0	0.0339673	0	0	0	0	0	0	3.46555	2.33917	0	0	1.92747	0	0	4.98342	8.06526	0	4.07585	4.15913	6.70869	4.18111	0	0	3.42286	10.7952	3.68211
hs1708	4.00726	0.0382062	0	0	0	0	0	0	0	0	3.79311	0	4.32342	4.08391	0	0	0	0	0	0	0	0	0	4.34637	0	0	4.08619	0	0	0.0161245	0	4.67708	0.102798	0	4.25043	0	0	4.42331	6.86102	0	0	0	0	0	0	0	0	6.45856	3.16536
hs1709	0	4.17511	0	4.3536	2.52861	0	0	0	0	0	0	0	0	4.35897	4.14791	0	0	0.012382	4.34199	0	0	0.0113197	0	0	0	0.0171493	0	0.0121651	0	0	0	0	0	0	2.56063	0	0	4.61716	3.90881	3.95328	0	4.41955	3.9246	0	0.0102518	0	4.24713	2.8025	3.89368
mm104	0.0647208	0.317953	0	0	0.866436	0	0	0	0.310891	0	0	0.200835	0.292767	0	0	0.543078	0	1.77254	0	0.0108114	0	0	0	0	0.271721	0	4.73826	0	0.0570196	0.0622287	0	0.206713	0	0	0	0.0179319	0	0.252645	4.46738	0	0.218189	0	0	0.0609812	0	3.95908	0	4.71762	3.62407
mm105	0	0.803958	0	0	0	0	0	0	0	0	0	2.8445	0.0111349	4.36911	0	0	0	0	0	0	0	0	0	0	0	0	0.0133993	0	0	0	0	0	0	0	0.0243749	0	0	0.0142854	0.0494733	0	0	0.0572579	0	0	0.0288326	0	0	0.0686067	0
hs1400	0	0	0	0	0.0282251	0	0.0737495	0	0	0	0.0240953	0.217709	0.135935	0	0	0	0.155074	0	0	0.0572873	0	0	0.0480445	0	2.28449	0	0.267881	0.0951087	3.95281	0.0770858	0	0	0	0	0	0	0	0	0.0231655	0	0.0553118	0	0.030313	0.0501502	0.0467215	1.66244	0.0260341	0.011659	0
hs1882	0	3.82864	0	0	0	2.53162	0	0	0	0	0	0.245276	0	0	0	0	0.0294968	0	0	0	0	0	0	0.317038	0	0	0	0	0.0576776	0	3.4456	1.7132	3.21021	3.16284	0.0129582	0	0.0126251	0	0.506455	0	0.358249	0.438148	0.341537	0	0.118865	0.0531966	0.351663	0.704829	0.424407
mm1304	0	2.13316	0	0	0.120515	0	0	0	0	0	0	0.0656788	1.26541	0	0	0	0	0.940321	0	0	0	0	0	2.42919	0	0.155495	0.092247	0	0	0	0	0.330986	0	0	0.212229	0	0	2.8883	2.15633	0.363077	1.86812	2.10237	1.26069	0	0	0.773697	0	2.17304	0.927064
hs558	9.51351	17.0083	0	0	0	0	0	0	0	0	0	0	0	0	0	0	0	0	0	0	0	0	0	3.87307	9.24729	0	0	4.26421	8.48751	3.99823	5.10643	6.02423	5.35119	4.66912	0.0664045	0	0	4.19447	0	0	5.59688	0	0	0	0	0	0	0	8.38299
hs2075	0	0	0	0	0.0597209	0	0	0	0	0	0	0.0119679	0	0	0	0	0	0	0	0	0	0	0	0	0	0	0	0	0	0	0	0	0	0	0	0	0	0.0278156	0	0	0	0	0	0	0	0	0	0.0118726	0.0284734
hs1913	0.93497	0.84613	0.184948	0	0.137003	0	0.041003	0	4.21825	0.0225845	0.525895	0	0	0	0	0.0932371	0.0328869	0	0	0	0.0215145	0	0	0	0	0	0.193524	0	0.055185	0	0	0	0	0	0	0	0	0.0438101	0	0	0.0263463	0	0.80039	0.978938	0.11253	0.0114585	0	0.0251711	0
mm106	0.534908	0.578246	0	0	1.509	0	1.99359	2.25041	0	2.22622	0	1.76202	0.539644	0	1.14609	0	1.29022	0.379704	0	2.01501	0	0	0	0	0.553818	0	0	0	0	0	1.194	1.31164	0.0807014	0	2.75364	0	3.55372	1.23919	2.70621	0	0	0	0	0.079383	0	0	0	2.56014	0.129954
hs581	4.48413	4.77989	0	0	0	0	0	0	0.126335	4.15552	0	0	0	0	0	0	0	0	0	0	4.14813	0	0	4.0278	0	0	0	0	0	4.41005	5.05214	5.17993	6.15433	0	4.42104	0	0	5.11351	0	0	0	0	0	0	5.12702	0	0	0	0
hs517	0	6.08063	0	0	0	0	0	0	0	0	0	0	3.97356	0	0	0	0	0	0	0	0	0	0	3.17183	4.47719	0	0	0	0	0	0	0	4.40309	0	0	4.34073	0	0.350443	0.0550804	0	4.73463	0	0	0	0	0	0	0.509344	0.193163
hs564	4.09331	4.24518	0	0	0	0	0	0	0	0	0	4.06753	0	0	0	0	0	0	0	0	0	0	0	0	4.79362	0	0	0	0	0	0	0	2.10055	0	0	4.00305	0	0.395395	0	0	0	0	0	4.27328	4.74704	9.26135	0	0	0
hs496	0	3.16581	0	0	0	0	0	0	0	0	0	0	0	0	0	0	0	0	0	0	0	0	0	0	0	0	0	0	0	0	0	0	0	0	0	0	0	4.38006	4.65044	0	3.86656	4.02885	0	0	0	0	3.94958	9.16097	4.08468
hs486	0	4.41454	0	0	0	0	0	0	0	0	0	4.05388	0	0	0	0	0	0	0	0	0	0	0	0	0	0	0	0	0	0	0	6.66889	0	0	0.705382	0	0	8.49488	0	0	0	0	0.0181449	0	0	0	0	0	0
hs491	0	0	0	0	0	0	4.01109	0	0	0	0	0	3.43038	0	0	4.18572	0	0	0	0	3.18472	3.38559	3.58356	3.53629	4.78337	0	0	0	0	0	0	0	0	0	1.97131	0	0	0	0.0605918	0.0475774	0.053491	3.69081	0.0699847	0	0	0	0	4.00033	0.0803537
hs492	0	0	0	0	0	0	0	0	0	0	0	0.155004	0	0	0	0	0	0	0	0	0	0	0	0	0	0	0	0	0	0	0	0	0	0	0	0	0	0.0198344	4.70224	0	0	0	0	0	0	0	0	5.12843	0
hs490	0	0	0	0	0	0	0	0	0	0	4.45415	0	0	0	0	4.20162	0	0	0	0	0	0	0	0	0	0	0	0	0	0	0	0	0	0	0	0	0	0	0	0	0	0	0	0	0	0	0	0	0
mm191	0	0	0	0	0	0	0.311492	0.260163	0	0.257387	0	0	0	0.0368733	0	0	0	0	0	0.358884	0	0	0	0	0	0	0	0	0	0	0	0	0	0	0	0	0	0	3.32582	0	0	0	0	0	0	0	0	3.18834	0
hs1731	0	1.05959	0.102755	0	0.0172932	0	0	0	0	0	0	0	0.183686	0	0.0128168	0	0	0	0	0	0	0	0	0	0.0190088	0	0.0516545	0	0	0	0	0	0	0	0.0499744	0	0	0	0.0246142	0	2.7589	0	0	0	0.0291758	0.0513992	0	2.77806	0
mm84	0	0	0	0	0	0	0	0	0	0	0	0	0	0	0	0	0	0	0	0	0	0	0	0.844968	0	0	0	0	0	0	0	0.0260019	4.02055	0	0.0367948	0.120375	0.128794	1.03551	0	0	0	0	0	0	0	0	0	0	0
mm91	1.00133	1.14221	0	0	0	0	0	0	0	0	0	0.0366884	0.261884	0	0.0142465	0	0	0	2.24095	0	0	0	2.21831	0	9.10489	0	0	0	0	0	0.125198	0	0.142635	0	0.0175168	2.75501	0.236936	0.296103	2.08004	0	0	0	0.0686369	0	0	0	0	0.425883	0.0827902
hs1559	0.836562	0	0	0	0.347921	0	0	0	0	0	0	0	0.148904	0	0	0	0.222617	0	0	0	0	0	0	1.2183	4.20994	0	0	0.891758	0.815171	0	1.06099	0	0	0	0.227804	0	0	2.56692	1.15687	0	0	0	0	0	1.67775	0	0	1.40467	4.4455
hs2349	0	0	0	0	0	0	0	0	0	0	0	0	0	0	0	0	0	0	0	0	0	0	0	0	0	0	0	0	0	0	0	0	0	0	0	0	0.0236124	0.0163772	0	0	2.57241	0	2.65666	0	0	0	0	2.15946	0
hs337	4.26043	0	0	0	0	0	0	0	0	0	0	0	0	0	0	0	0	0	0	0	0	0	0	0.154337	3.55336	0	0	4.02	4.19044	0	0	0.0116259	0	0	0	0	0	0	0	0	0	0	0	0	0	0	0	0	0
mm17	0.0106113	0.689317	0	0	0	0	0	0	0	0.0167395	0	0	0.133315	0	0	0.0197715	0	0.0555995	0	0.0103972	0.0315754	0	0	1.14072	0	0	0	3.0785	3.57771	0	1.06078	1.17898	0	0	2.13686	1.14323	1.08343	1.93885	1.02173	0	0.0252538	0	0	0	0	3.9027	0	0.996503	0
hs338	0	0	0	0	0.138814	0	0	0	0	0	0	0	0.183578	0	0	0	0	0	0	0	0	0	0	0	4.89963	0	0	0	0	0	4.31814	2.36661	0	0	4.01637	4.58979	4.08203	0	0	0	0	0	0	0	0	0	0	3.88254	0.253587
hs2078	8.48849	7.83461	2.6798	0	1.60175	0	0	0	0	0	0.667515	5.79564	2.03951	4.78782	0	0	0	0.19513	0	0.0206568	0.0594717	0.0539744	0	0	0.502889	0	0	4.44533	4.36873	3.87052	0.237135	4.18032	4.78331	0	1.1884	0	4.02045	0	3.94364	0	3.47176	8.04978	3.75002	5.87118	0	0	3.5965	3.98835	4.47669
hs1875	4.70333	4.40431	0	0	0	0	0	0	0	0	4.41005	0	4.90309	0	5.65758	0	0	0	0	0	0	0	0	0	4.39577	0	4.59346	4.76955	4.41341	0	5.56067	15.2721	4.98716	0	14.458	0	4.82221	0	0	0	0	0	0	0	0	0	0	0	0
hs941	3.93577	5.14613	0	0	0	0.0113092	6.42391	0	0	0	0	0	0.0506136	0	0	0	0	0	0	2.80914	0.0278977	2.07335	0.0106212	0	0.0726506	0	0	0	4.91157	0	5.63508	4.23559	4.54937	0	0.455944	1.2076	0.0242477	3.68388	0	0	0	0	0	4.69451	0	0	0	0.0770659	0
hs90	0	2.18526	0	0	1.60131	0	3.13837	0	0	0	0.0155586	4.5563	4.0944	0	0	7.07783	6.98344	4.03784	0	0	0	0	4.14509	0.0112553	5.74485	0	4.06251	0	0	0	0.0202077	2.34614	0.0160801	0	0.0157927	0	0	4.1128	0	0	0	0	0	4.68477	0	0	0	0.957523	0
hs88	0	0	0	0	0	0	0	0	0	0	0	1.73541	0	0	4.02641	0	0.108867	0	0	0	0	0	0	0	0	0	0	4.32871	0.0150649	0.0131228	0	0	0	0	0	0	0	0	0	0	0	0.0187874	0	0	0	0	0	0.0249529	0
hs91	8.43213	5.06997	0	0	0	0	0	0	0	0	1.78434	0	0	0	0	0	0	0.101413	0	0	0	0	0	0.0168972	4.01829	0	0.106226	4.63262	4.07843	4.81999	0	0	0	0	0	0	0	2.07186	0.0377274	0	0	0	0.0750612	4.82022	0	0	0	0.0450467	0
hs87	4.87943	0	0.604921	0	4.1549	0	0	0	0	0	4.83204	0	3.66248	0	4.00366	0	0	0	0	4.6378	3.75784	0	3.74761	0	4.07988	0	0	4.04818	4.17849	0	3.69112	4.35891	3.74373	0	9.14992	0	0	0	4.94726	0	4.20929	4.04141	0	0	0	0.236218	4.49268	0	4.31762
hs92	0	0	0	0	0	0	0	0	4.07385	0	0	0	0	0	0	0	0	0	0	0	0	0	0	4.91848	0	0	0	0	0	0	0	2.4884	0	0.107053	0.245223	0	0	0	0	0	0	0	0	0	0.0593905	0	0	3.06062	0
hs93	8.08494	0	0	0	0	0	0	0	0	0	0	0	0	0	0	0	0	0	0	0	4.34907	4.52234	0	4.17432	0	0	4.24793	0	0	0	0	0	0	0	0	0	0	0	4.4285	4.52565	4.36318	4.76734	4.46919	5.28988	0	0	4.99543	4.93436	4.64125
hs107	0	0	0	0	0	0	4.11267	0	0	0	0.935005	0	2.75219	1.60365	0	0	0	0	0	0	0	0	0	2.07287	4.7791	0	0	0	0	0	0	0	0	0	0	0	0	5.56466	0	0	0	0	1.91266	0	0	0	0	0.113614	0
hs94	0	0	0	0	0	0	0	0	0	0	4.29015	0.1284	0	0	0	0	0	0	0	0	0	0	0	0.0138802	0	0	0	4.21283	4.99531	4.11014	3.33781	0	0.198362	0	2.94335	0	0	0	0	0	0	0	0	4.38405	0	0	0	0	0
hs920	0	0	0	0	0	0	0	0	0	0	0	1.6465	0	0	4.5986	3.9836	0	0	0	0	0	0	0	0	4.2015	0	0	0	0	0	3.51892	4.23244	3.34301	0	12.819	0	0	0.543629	0.589845	0	0	0	0	0	0	0	0	0.599613	5.88256
hs1242	4.463	4.157	0	0	3.12034	0	4.14059	0	3.04791	0	0	4.58987	0	4.24155	0	0	0.500939	0	0	0	0	0	0	0.963108	0	0	1.63688	1.00429	0	5.36891	3.70795	7.5528	3.55158	3.32031	8.58517	4.52645	3.5559	3.55336	0	0	0	0	0	8.61656	0	2.9475	0	0	0
hs1431	4.35686	4.1887	4.92445	0	0	0	0	0	0	0	0	0	0	4.0846	0	0	0	0	0	0	0	0	0	0	0	0	0	5.063	4.12718	0	0	1.6432	0	0	0.472184	0	0	0	0.84505	0.729518	0.850657	0	0	4.12494	0	0	0	0.860391	0.667568
mm382	0	0	0	0	0	0.0104211	0.0168471	0.0110137	0.0794013	0.0139514	0	0	0	0	0	0	0.0157615	0	0	0.016406	0.0124766	0	0.0650071	0.0320735	0	0	0	0	0	0	0	0.113333	0	0	0	0.0203474	0.0191754	0	0	0	0	0.775561	0	0	0	0	0	0.0174988	0
mm466	5.24997	2.94684	0	0	0	0	4.21538	0	0	0	4.13436	0	4.17012	0	0	0	5.29619	2.2923	0	0	0	0	0	0	0	0	0	0	0	4.63697	0	8.13244	0	0	4.15996	0	0	0	3.04259	0	3.9782	0	5.14106	4.57743	0.14172	0	0	3.39106	0.0788404
mm383	0	0	0	0	0	0	0	0	0	0	0	0	0	0	0	0	0	0	0	0	0	0	0	0	0	0	0	0	0	0	0	0.0417889	0	0	0.0328977	5.80805	0	7.35064	1.01312	0	0.760327	0.984789	0.702412	0	2.50037	0	0	0.0329879	0
mm467	0	0.0869136	0.03669	0	0	0	3.9739	0	1.29015	0	0	0.0283779	0.404027	0	0	0	0	0	0	3.76925	0	0	4.02334	0.394589	0	0	2.68872	4.21921	4.10757	0	3.98713	2.10813	3.5421	0	2.13717	0	5.00164	3.05969	2.90188	0	0	0	2.6048	0	0	0	0	3.20608	3.10497
hs1620	0	4.58931	0.673139	0	0.0747142	0	0	0	0	0	0	0	1.08224	0.14068	0	0	0	0	0	0	0	0	0	0	0.192894	0	0.781445	0	0	0	0	0.217299	0.0148861	0	0	0	0	0	0.0106364	0	0.017905	4.77878	0	0	0.870309	0.066747	0.0100696	4.39421	0
mm321	2.75649	2.23948	0.0100134	0	0	0	0	0	0.0169174	0	0	0.271982	0	0	0	0	0	0	0	4.13018	0	0	0	3.36817	0	0	0	0.0121907	0.0124992	0	0	0	0	0	0.228301	0	0	0.106376	0.0348283	0	0.0177802	0.0497559	0.0449683	2.72533	0.0149446	2.52448	0	0.133082	0.0251922
hs515	0	4.0144	0	0	0	0	0	0	0	0	0	0	4.92737	0	0	0	0	0	0	0	0	0	0	0	0	0	0	0	0	0	0	0.0360082	0	0	0	0	0	0	0	0	0	0	0	0	0	0	0	0	0
hs497	0	0	0	0	0	0	0	0	0	0	0	0	4.49757	0	0	0	0	0	0	0	0	0	0	0	0	0	0	0	0	0	0	0	0	0	0	0	0	0	0	0	0	0	0	0	0	0	0	0	0.0273873
hs2083	0	0	0.0116776	0	0	0	0	0	0	0	1.5342	0	0	0	0	0	0	0	0	0	0	0	0	0	0	0	0	0	0	0	0	0	0	0	3.27007	0	0	1.29114	7.66408	0	4.42748	0	0	0	0	0	0	2.98413	0
hs2382	0.0820817	3.96104	0	0	0	3.77206	3.64775	3.05712	0	0	0	0.351289	0	0	0.0116062	0	0	0	0	3.61231	3.37372	0	0.31552	0	0	0	0	0	0	0	0	0	0	0	0	1.49496	1.60747	0	0.808261	0	0	0	0	0.0821141	0	0	0	0.709567	0
hs1952	0	0	0	0	1.81553	0.0202024	0	0	0	0	0	0.231929	0	0	0	0	0.156184	0	0	0	0.0459081	0.0435695	0	0.0278342	0	0	0	0	0	0	0.0443816	3.95565	0.0903367	0	3.35369	0	0	0	0.569925	0	2.50482	0	0	0	0	0	0	0.240336	2.41021
mm1315	0	2.02981	0.0123744	0	0	0	0	0	0.284483	1.05899	1.00697	0.150229	0	0	0	0	0	0	0	0	0	0.265301	0	7.46013	0.0789319	0	1.37195	0	0.940258	0	0	0	2.64399	0	0.410905	0.0172321	0.0418792	0.0150636	1.82679	0	4.57401	0	1.64884	0	0.0754505	0	0	4.52624	1.98038
hs887	0	0	0	0.932677	0	0	0	0	0	0	0	0	1.65981	0	4.25571	0	0	0	0	0	0	0	0	0	0	0	0	0	0	4.03905	4.1798	0	0	0	0	0	4.36856	0	0	0	0	0	0	0	0	3.59125	0	0	0
hs1286	0	0	0	0	0	0	0	0	0	0	0	0	0	0	0	0	0	0	0	0	0	0	0	0	0	0	0	0	0	0	0	0	0	0	0	0	4.11351	0	0	0	0	0	0	0	0	0	0	0	0
hs1563	4.30415	0	0	4.13936	0	0	0	0	0	0	0	4.11808	0	0	4.83016	0	0	0	4.16773	0	0	0	0	0	0	0	0	0	0	0	2.82695	0	2.74127	0	0	0	0	4.1255	0	0	0	0	4.12712	4.78152	0	0	0	4.41916	4.30496
hs1344	9.87481	0	0	0	0	0	0	0	0	0	0	0	0	0	0	0	0	0	0	0	0	0.443846	0	0	0	0	0	9.139	9.14784	0	0.646922	0.382234	0.358141	0.27198	0.399918	0	0	5.29305	4.00873	0	3.67107	0	0	6.11764	0	0.368939	0	0	0
hs1453	8.70352	0.0932528	0	0	0	4.23657	4.27165	0	6.81048	7.27628	0.0130203	0	0	0	0	3.42454	0	0	0	4.04239	2.56949	0	5.37366	5.22668	1.26267	0	0	3.93041	4.80704	0	0	0.0128911	0	0	4.12344	0	0.0133916	2.79179	0.0188604	0	4.09151	0	0	4.32057	0	0	0	5.5463	0
hs1543	4.67963	0.0407292	0	0	0	0	0	0	0	0	2.24456	0	0	4.16178	0	0	0	4.19625	0	0	0	4.19525	0	0	0.0228391	0	0	0	3.88389	3.54909	0	0	0	0	0	0	0	0	4.02781	0	4.13614	0	0.0404043	9.87553	0	0	0	0.0457349	3.92177
hs2091	0.580236	0.507284	0	0	0	0	0.0402596	0	0	0	0	0	0.0801403	0	0	0.0433493	0	0	0	0.0278045	0	0	0	0	0.0241292	0	0	0	0	0	0	0	0	0	0	0	0	0	0.202679	0	0.154249	0.11108	0	0	0	0	0.157586	0.187035	0.880818
mm1352	0.465465	0.303979	0	0	0	0	1.05127	0	4.20326	0	0	3.91166	1.50619	0	0	0	0	0	0.0245852	0	0	0.0729553	0	3.09133	0.289228	0	1.35337	0.0112356	0.011548	0.42152	1.54958	0	0	0	0	0	0	0	0.116705	0	4.09286	1.24208	0.0200317	0.0260875	0.386701	0	0.113587	3.86475	0.236476
hs2031	0.0933365	0.0667199	0.0407275	0	0	0.0815109	0.0115891	0	0	0	0.213678	0.224223	0.0152458	0	0	0.726693	0.177717	0	0	0.0329489	0	0	0	0.496559	0.301114	0	0.0122702	0	0	0	0.0272423	0.0110121	0.0108742	0	0	0	0.611348	0.144502	8.28889	0	4.44526	0	7.04246	0.0167189	0	4.99936	0	8.52015	4.94264
hs1889	1.26308	0.794193	0.0494996	0	0	0	0.0249908	0	0	0	1.47603	0.708183	0.307311	0.0519853	0.46215	0	0	0.243372	0.211852	0	0	2.86386	0	1.00281	0.21995	0	0	0.149873	0	0	0.356143	1.83547	0.607767	0	2.59972	0	0	0.0370122	0.0252247	0	0	0	0.0183715	0.26553	0.388145	0.17795	1.64566	0.0673511	0
mm1339	0	0	0	0	0.0677713	0.0307149	0.0315848	0	0	0	0	0	3.06962	3.42343	0	0	0	9.8747	0	0	0	0	0.0339787	6.20445	0.0894223	0	0.485295	0	0	0	0	0.132866	0.0364399	0	1.80321	0	0	0.0794212	5.05601	0	7.76436	0	0	0	0.0104012	1.23891	0	4.64975	0.491007
mm1361	3.16483	5.58075	0	0	0	0	1.50232	1.53973	0.401567	1.66994	0	0	0.248524	0	0	0	0	0	0	1.29459	1.58468	0	0.906146	2.5484	2.3379	0	0.0506622	0.0987574	0	2.16667	0.0699669	3.15262	0.0725177	0	0.373441	0	0	0	0.109024	0	0.103761	0.101959	0.114039	0	0.859731	1.03933	0.124701	0.122953	0.118881
hs1648	0	0	0	0	10.3895	0	0.0214014	3.58449	0	4.05389	0	5.63827	0	0	0	0	5.16791	3.97218	0	2.62564	4.02349	0	0	5.56771	0	4.48678	0	0	2.91035	0	0	0	0	0	0	0	0.128933	0.22692	0	0	0	0	0	0	0	0	0	2.36259	2.14002
hs255	0	4.09637	0	0	0	0	0.0366665	0	0	0	0	0	0	0	0	0	0	0	0	0	0	0	0	0	0	0	0	0	0	0	0	4.21968	4.01011	4.03245	0	0	0	4.14569	0	0	0	0	0	4.62709	0	0	0	0	0
hs254	0	0	0	0	0	0.224027	0.237978	0	5.36151	0	0	0	0	0	0	0	0	0	0	0.26064	0.761648	0	4.08778	3.8935	2.3745	0	0	0	0	4.21824	0	0	0	0	0	0	0	4.71444	4.31225	0	0.0228862	0	0.0182735	0	0	0	0	0.0204554	0.0144909
hs253	0	4.22257	0	0	0	0	0	0	0	0	0	0	0	0	0	0	0	0	0	0	3.85697	0	0	4.0846	2.24138	0	0	4.70997	4.40894	4.70997	4.04209	4.2644	4.09098	0	8.80323	4.27409	4.11428	4.75945	12.952	0	4.32315	4.24185	0.127205	4.39903	0	1.54771	4.50611	9.58432	4.86328
mm1301	0	0	0.0588436	0	1.79776	0	0.350385	0	0	0	0	0	1.50396	4.56225	0	4.56152	0.312214	0	0	0	0	0	0.321616	0	0.619179	0	0	0	0	0	12.4769	9.43985	7.92015	0	9.16807	0	0	4.56332	1.01882	0	0	0	0	0	0	0	0	5.74627	4.23462
hs1685	8.27295	5.87581	0	0	4.09276	0	3.90073	0	1.05158	0	0	0.74229	4.4412	2.163	0	0	0	0.0204864	0	0	4.02649	4.63928	0	0.0115227	0.0121602	0.0229606	0.015138	0.0677664	0.0545961	0	4.15428	1.27126	4.31247	0	4.32115	0.0414631	0	9.12076	0.167509	0	4.26827	0.184408	0.154362	0.108779	0	0	0.158674	0.211326	0.158987
hs1462	0	3.9497	0	0	0	0	0.102122	0	0	0	4.56526	0	0	0	0.0277697	0	0	0	0.0909033	0	0	0.0466271	0	3.34537	0	0	0	0	0	0	0	0.173526	2.36607	0	0.0447264	0	0	0	0	0	0	0	0	0	0	0	0	0.0213956	0
hs1475	0	4.34966	0	0	4.13332	0	3.91556	0	0	0	0	0.0471023	0	0.0166665	0	0	4.02238	1.00581	0	4.1977	0	0	3.99732	0	0	0.0139148	0	0	0	0	0	3.03566	0	0	0.0919709	1.65567	2.97116	3.4355	2.77421	0	3.30649	0	2.63263	0	0	0.0111603	2.67225	2.70539	0.650373
hs1377	0	0.0278061	0	0	0	0	0	0	0	0	0	4.06495	0.0746743	0	0	0	0	0	0	0	4.18177	0	4.05799	0	0	0	0.641659	0	4.6968	4.37675	0	0.0347321	0	0	1.74822	4.16813	4.30715	0	0.249847	0	0	0	0.157063	0	0	0	0	0.24204	3.23467
hs1304	0	0	0	0	0	0	0	0	0	0	4.11838	1.74272	0.177012	0	0	0	0	4.41794	0	0	0	0.552637	0	0	4.53018	0	4.24413	0	0	0	0.0481348	0.0332926	0	0	0	0	3.31094	0	2.01859	0	2.39024	0	0	0	0	0	0	0	0
hs1441	4.64128	0.0348891	0	0	4.02867	0	0	0	0	2.93946	1.51785	3.55303	0	0	0	0	0	4.7122	0	0.240682	0	0	0	1.37198	0	0	0	0	0	0	9.54888	4.04721	9.13399	3.64542	4.22621	4.057	0	6.75248	0.0111496	0	0.144604	0	0	0	0	0	0	0.5113	0.0114371
hs1692	5.04188	0	0	0	0	0	0	0	0	0.353951	0	0.373396	0	0	0	0	3.85962	4.33176	0	0.0126462	0	0	0.435312	0	0.123448	0	0	0	0.335993	0	0	0	0.0451409	0	2.39643	2.2872	2.65444	0	0.547552	0	0.602326	0	0	0	0	0	0	0.777905	1.3424
hs1684	0	3.96338	0	0	0	0	0	0	0	0	0	0	0	0	0	0	0	0	0	0	0	0	0	4.84002	0	0	0	4.05306	0	0	0	3.56742	0	0	0	0	0	8.50207	0	0	0	0	0	0	0	0	0	0	0
hs2400	0	0	0.0207529	0	2.85823	0	0	0	0	3.2833	0	2.09202	0	0	0	0	0.924038	0	0	0	3.58315	0	0	3.774	0	0	0	1.44126	0	0	0.0245331	0	0.0272985	0	0.255583	0	2.65649	0	1.4771	0	1.3835	0.0777423	0	0	0	0	0	1.18646	0
hs945	0	0	0	0	0	0	0	0	0	0	0	0	0	0	0	0	0	0	0	0	0	0	0	4.89057	0	0	0	0	0	0	0	0	0	0	0	0	0	0	0	0	3.95897	0	0	0	0	0	0	4.83677	0.232655
hs1548	4.25687	4.51245	0	0	0	0	1.65859	0	3.92948	0	0	0	1.57484	0	0	4.00305	2.91016	0	0	0	0	0	0	0.476899	0	1.32424	0	0	0.515678	0.0222283	4.32162	0.780803	4.23198	0	7.62285	4.75868	4.66351	8.16883	4.52723	0	4.12851	4.02422	0	0	0	9.84765	0	7.86722	1.10874
mm817	0	2.07907	0	0	0.0105897	0	4.32883	0	0.662199	8.14451	4.00382	4.08619	10.1366	0	0	0	0	4.34388	0	0.053542	4.04672	0	4.12494	0	4.60371	0	0	0	0	0	0	0.0361496	0.0477619	0	0.171371	0	0	4.42136	0.085634	0	0.0315007	0	2.79827	5.66273	0	0	0	0.105653	0
hs1346	0.0113113	2.68258	5.37469	0	0.0682707	0	0	0	0	0	0	0	7.55504	0	4.30133	4.08619	0.190478	0	0	0	0	0	0	0	0.0485371	0	4.13121	4.39307	4.76605	4.16011	0	0	0	0	0	0	0	4.22132	0.0653233	0	4.19275	0.0379574	0	0.236954	5.28735	0.0843949	0	0.0526647	0.0759432
mm769	0	3.60165	0	0	0	0	0	0	0.626767	0	0	0.082498	0	0	0	0	0	0	0	0	0.0774297	0	0	6.28652	0.402324	0	0	0	0	0	1.24786	0	1.23469	0	1.51057	0	0	3.5804	0	0	0	0	0	0	0	0	0	0	0
mm768	0	1.05693	0	0	0	0	0	0	0	0	0	0	0.101184	0	0	0	0	0	0	0	0	0	0	0	1.11937	0	0	0	0	0	0	0	0	0	0	0	0	0	0	0	0	0.520993	0.516796	0	0	0	0.55465	0.514124	0.516177
hs2084	0	0	0	0	0	0	0	0	0.136416	0	0	0.0519584	0.403179	0.139482	0	0	0	0	0	0	0.0122586	0.0197729	0	0	0	0	0	0	0	0	0.0218879	0.142045	0.0250123	0	0.0246416	0.0144363	0.0311882	0	4.18118	0	2.38885	0	0	0	0.223425	0	0	3.48328	0
mm107	0	2.04498	0	0	0	0	0	0	0	0	1.03302	0.145963	0.472066	1.10482	0.0414689	0	0	0	0.102236	0	0	0	0	1.3946	1.07016	0	0	0.143003	0	0	0	0	0	0	0.671981	0	0	3.14715	0.21197	0.143023	0.186777	0.182328	0	0.0567337	0.0698717	1.49433	0.176793	0.240636	0.174883
hs1811	0	0	0	0	0	0	0	0	0	0	0	0	0	0	0	0	0	1.60041	0	0	0	0	0	2.87085	0	0	0	0	0	0	0	0.0110903	0	0	0.0119133	0	0	0.0223189	0.0390038	0	0	0	0	0	0	0	0	0.0334092	0.0134106
hs1516	0.243587	0	0	0	0	0	0	0	0.0122303	0	0	0	0	0	0	0	0	0	0	0	0	0	0	0	3.64482	0	0	0	0	0	0	2.319	0	0	0	0	0.064262	0.0157428	0	0	0	0	0	0	0	0	0	0	0.260866
mm1194	3.40666	5.29243	0	0	0	0	0	0	0	0	0	0	0	0	0	0	0	0	0	0	0	0	0	0	0	0	0	10.2046	14.2489	9.38933	0	0.0154752	0.0113874	0	0	0	0	0	0	0	0	0	0	3.96715	1.22431	0.82214	0	0.139946	0.0152669
mm1389	0	0	0.0427706	0	0	0	0	0	0	0	0	0.018452	1.51294	0	0	0	0	0	0	0	0	0	0	0	0.183113	0	0.515083	0	0	0	1.64476	0.0241529	0.0346653	0	0.0376733	0.0183921	0.0222735	2.64215	1.60504	0	1.46771	1.37023	0	0	0	0	1.26659	2.83613	0
mm108	0	0	0	0	0	0	0	0	0	0	0	0	0	0	0	0	0	0	0	0	0	0	0	0	0	0	0	0	0	0	0.0182841	0.0343066	0	0	0	0	0	0	0	0	0	0	0	0	0	0	0	0.0179161	0
hs1955	4.28765	0.0257395	0.325235	0.0442873	0	0	0	0	0	0	0	0	0.0124377	0	0	0	0	0.0124168	0	0	0	0.046356	0	0	0.780106	0	0	3.39711	3.46052	4.3857	0	0	0.0119043	0	0	0	0	0	1.23941	0	0.0161994	0	1.26081	0	0.0265908	0	0	0.0909875	0
hs2111	0	7.82177	0.010533	0	0	0	0	0	0	0	0.0350534	0.278997	0	0	4.7342	0.0124037	0	0	0	0	0	0	0	0	0	0	0	0	0.0308695	0	0.0256713	0.690764	0.332817	0	0	0	0	0	0	0	0	1.05321	0	0	3.17604	0	0	0	0
hs2377	0	0.190829	0	0	0	0	0	0	0	0	0	0	0.0136816	0	0	4.58978	4.2665	0	0	0	0	0.0282839	0	0.07124	0.135451	0	0.0117628	0	0	0	0	0	0	0	0	0	0	0	0	0	0	0	0	0	0	0	0	0.886566	0
hs1358	4.28988	4.96864	0	0	0.480205	0	4.16549	0	0	0	4.43771	0	3.85784	0.959561	0	0	0.343831	0.0410901	0	0	0	0	0	5.90253	0	0	0	0	10.543	4.05159	3.44325	2.05997	0.291163	0	1.70765	0	0.149873	4.73977	0.148931	0	0.128808	0.115868	0.113278	8.47387	0	0	0.111352	0.102838	0.109759
mm26	2.31525	4.02207	0	0	0.0217383	0	0	0	0.161264	0	1.72225	0	0	0.0420688	0	0.0238529	0.0186727	0	0	0	0	0	0	0	0	0	0	0.0749816	0	0	0	0	0	0	0.382824	0	0	0	0	0	0	0.0100769	0.0462274	0.264273	0	0.214807	0.0115273	0	0.0107124
mm156	0.0442168	0.464113	0	0	0	0.0221666	0.199537	0	0	0	0	0	0.112965	0	0	0	0	0	0	0	0	0.0392475	0	0	0.472757	0	0	0.0501847	0.0536737	0	0	0.650338	0.173978	0	0.633922	0	0	2.14816	0	0	0.322193	0	1.88605	0	0	0	0	0.118654	0
mm89	0	1.86303	2.1294	0	0	3.52159	4.23473	3.38025	0.106133	3.60943	0	0.109219	0.470202	0	0	0.153056	0	0	0.0639726	0	3.66101	1.3764	3.29313	2.35863	0.311354	0	0	3.1971	0	0	0.0111555	3.19021	0	0	3.29255	0	0	3.48284	3.62558	0	2.4638	3.45689	0	0	2.52833	0	0.0145574	4.20751	0.049407
hs1310	0	0	0	0	0	0	0	0	0	0	0	0	0	0	0	0	0	0	0	0	3.6644	0	0	0	0	0	0	0	0	0	2.24922	3.74164	1.68551	0	1.89362	0	0	0.0304874	0	0	0	0	0	0	0	0	0	0	0
hs1828	0	2.28935	0.0267995	0	0.0387331	0	0.0179437	0	3.24661	0	0	1.74857	2.30885	1.64831	0	3.72876	4.02375	0	0	0.0139394	0	0	0	1.95192	0	0	0.113721	0	0	0	0.0177112	0.0116385	0.0152513	0	0	0	0	1.77289	0	0	0	0	0	0	0.0199501	0	0	0	0
mm843	0	0	0.64597	0	0	0	0	0	0	0.0853742	0	0.180031	2.21959	0.0699544	0	0	0	0.012103	0	0	0	1.27642	0	0.0752433	0	0	0	0	0	0	0.210723	3.78131	0	0	4.83677	0.0792694	0	3.15434	0	0	0	1.25562	0	0	0	0.0146234	0	0.164717	4.06834
hs505	0	0.0190002	0	0	0	0	0	0	0	0	0	0.18354	0	0.414559	0.019209	0	0	0	0	0.0318164	0	0	0	0	0	0	0	3.9633	4.37259	2.67485	0	0	0	0	0	0	3.08706	0	0	0	0	0	0.0468485	0	0	0.221301	0	0	0
mm824	2.07528	2.77882	0	0	0	0.235464	0.344344	0	0.0107422	0	0.0467869	0	0	0.0101703	0	0	3.04385	0.0474614	0.518	0.70915	0	0	0.370609	0.228176	0.458202	0	0	1.3548	1.27859	1.15881	0.0256981	0	0.025963	0	0.758099	0.0306779	0.431027	3.44696	2.41897	0.104853	2.60222	2.59239	2.53801	1.99514	0	0.947419	2.62102	3.10916	2.65844
hs1887	5.00163	4.5431	0	0	0.206506	3.91048	4.56442	0	0.267543	4.38398	2.29025	1.49139	2.39317	0	1.90068	0	0	0	0	4.08991	5.23799	0	4.92812	2.39377	2.37048	0	0	2.83669	0	0	0	0.177934	0	0	4.37075	0.0229588	0.011002	1.372	1.2995	0	1.34716	0	0	2.25158	0.0319433	0	0	4.15587	0
mm81	0	0	0	0	0	0	0.0365445	0	0	0	0	0	0	0	0.114723	0	0	0	0	0.0396472	0	0	0	0	0	0	0	0	0	0	0	0	0	0	0	0	0	0.19441	0.0707839	0	0	0	0	0.0502877	0	0.256519	0.05631	0.0467793	0.0406655
mm755	0.486607	3.64326	0.112218	0.0134934	0	0.129861	0.141105	0	0	0	0	4.65384	4.01678	0.0756418	0.0208324	0	0.122768	1.36737	0.182385	0.1271	0.0599269	0	0.109419	0	0.0296296	0	0	0.156742	0.153015	0.152287	0.249024	0.292082	0.202829	2.43178	7.13492	0	0	4.56521	4.09708	0	2.18716	4.11028	3.15181	0.0121416	0.686203	0.0591437	2.5243	8.30826	2.56926
hs1366	4.00922	0	0	0	0	0	0	0	0	0	0.96041	0	0	0	0.219544	0	0	0	0	0	0	0	0	0	8.647	0	0	4.05306	0	0	0	0	1.89503	0	0	0	0	0	0	0	0	0	0	2.77308	0	0	0	0	0
mm1326	4.79374	4.03331	0.017639	0	3.38732	0	0	0	1.85494	0	0.712352	0	3.92544	0.146075	0	0	0	0	0.399174	0	0	0.410716	0	0.178974	0.0634139	0	0.239408	0	0.329665	0	0	0.281616	0	0	0.109773	0	0	4.07836	0.0314692	0	0.0307098	0	0.371124	0.458327	0.0231716	1.47564	0	0.386475	0.0919943
mm90	0	0.337346	2.07206	0	0.0216995	0	0.745051	0	0.0194637	0	0	0.742544	2.14812	0.023687	0	0	0	2.07733	0	1.97	0	0	0	0.35957	0	0	0	0	0	0	0	0	0	0	1.69329	0	0	4.10391	0	0	0	0	0	0	0	0	0	0	0
mm252	0	0	0	0	0	0	0	0	0	0	0	0	0.0128162	0	0	0	0	0	0	0	0	0	0	0	0	0	0	0	0	0	0	0	0	0	0	0	0	0	0	0	0	0	0	0	0	0	0	2.09647	0
hs2397	0	0	0	0	0.142327	0	0	0	0	0	0	0.895228	1.33637	0	0	0	0.829888	0	0	0	0	0	0	0.0999025	0	0	0	3.03498	0	2.77668	0.551281	0.436631	0.520704	0	0.877599	0	2.4541	2.22651	0	0	0	0	0	0	0	0	0	0	0.269278
hs1461	3.70879	6.46055	0	0	2.62001	0	0	0	0	0	4.02726	3.60042	2.55167	3.54608	0	0.874298	0	0	0	0	0	0	0	1.65594	0	0	0	0.0172261	0.0172261	0.0153988	0	0.786182	8.09741	0	0.199686	4.81816	0	4.12754	0	0	0	0	0	0	4.74532	2.23465	0	2.26486	4.09464
mm924	0	2.60097	0	0	4.75496	0	0	0	0	0	0	0	2.16308	0.193833	0.774297	0	0	0	0	0	0	0	0	4.14569	0	0	0	0	2.60498	0	4.51757	1.22214	8.6842	0	4.75081	3.85789	3.25985	0	4.15471	0	0	3.95852	8.73142	4.91009	1.82072	0.225257	0	4.69556	8.00636
mm657	0	0	0	0	4.38934	0	0	0	0	0	0	6.98135	0	0	0	0	0	1.23368	0	0	4.01773	0	0	5.66744	0	0	0	0	4.36653	0	2.21787	3.104	0	0	1.34827	0	0	0	7.52819	0	3.24569	0	4.65793	0	0	4.12033	0	18.1501	4.45469
hs1495	0	0.0124041	4.20761	0	0	0	0	0	0	0	0.0834885	0	0	0.483435	0	0	0	0	0	0	0	3.87732	0	0.242187	0	0	0	0	0	0	4.14752	4.96658	5.85387	0	0	4.01682	4.23539	0.0970362	0.145096	0	3.91272	0	0.941801	0	0	0	0	1.68831	0
hs2399	0.0225862	0.0293474	0	0	0	0	0	0	0	0	0	0	0	0	0	0	0	0	0	0	0	0	0	1.41371	0.165301	0	0	0	0	0	0	0	0	0	0.0281645	0	0	3.05716	0	0	0.0105896	0	0.0138819	0	0	1.20078	0	0	0
hs1100	10.4303	7.8041	0	0	0	0	0	0	0	0	0	0	0	3.91426	0	0.0283586	0	0	0	4.12037	0	0	0	0.0173718	4.64472	0	0	8.9894	11.0167	9.01936	0	4.05998	0	0	5.56861	0.106551	0	4.37872	0	0	0	0	0	4.10237	0	0	0	0	0
hs281	28.057	4.39794	0	0	0	0	0	3.90962	0	4.12074	0	0	4.61979	4.18776	0	0	0	0	0	4.50221	4.1354	0	0	0	0	0	0	4.22185	16.9185	0	0	4.1349	0	0	0	0	0	0	0	0	0	0	0.346295	18.2054	0	0.663951	0	0	0
mm751	0.0484387	0.0295139	0.568022	0	0.150472	0	0.434842	0	0	0	0.310638	0	0	0	0	0	0	0	0	0	0	0	0	9.00941	0.0470618	0	0	0.0364014	0.0364014	0	2.55445	2.11802	2.63685	0	2.54795	0	0	4.9341	0.285286	0	0.261478	0.197102	0	0	0.113551	2.71694	0.238401	0.846467	0.228007
hs1145	17.9547	17.9128	0	0	0.0115837	0	4.08938	0	0	0	4.63264	7.6161	0	0	0	0	4.02288	0	0	0	0	0	0	0	0	0	0	13.8411	9.60875	8.63647	0	0	4.29822	0	0	0	0	0.219319	0	0	0	0	0	13.1838	0	0	0	0	0
hs1003	4.00524	10.9712	0	0	0	0	0	0	5.34301	4.1343	0	0.715755	0.147263	0	0	0	0.0679336	0	0	0	4.04191	0	0	0.829489	5.25727	0	0	0	0	0	3.54782	0	0	0	0.628345	0	0	3.89097	1.80137	0	2.39651	1.22935	0.433508	0.261501	0	0.383561	0	0.452143	2.222
hs1225	0	4.48576	0	0	0	0	0.901547	0	0	0	0	0	0	0	0	0	4.20971	0	0	0	0	0.429408	0	3.24539	0.0121174	0	0	0	0	0	0.0576278	3.64549	0	0	4.10867	0	0	10.7588	6.44832	0	4.06017	0	0	0	0	0	0	4.75786	1.0126
mm276	0	0	0	0	0	0	0	0	4.03453	0	3.65586	4.09332	1.56801	0	0	0	0	0	0	0	0	0	0	2.02201	0	0	0.0519254	0	0	0	1.96437	2.10189	1.79349	0	1.7733	0.161416	0.183547	2.30003	0	0	0	0	0	0	0	0	0	0	0
hs750	0	0	0	0	0	0	0	0	0	0	0	0	0.0660269	4.68613	0	0	0	0	0	0	0	0	0	0	0	0	4.28618	0	9.43409	0	4.12843	0	0	0	4.2321	8.36199	0	0	4.98716	0	4.4437	4.09259	4.9431	0	0	0	0	9.30576	0
hs839	0	0	0	0	0.255004	0	0	0	0	0	0	0	0	0	0	0	0	0	4.06956	0	0	0	0	4.05899	4.09205	0	0	0	0	0	0	0.393914	0	0	1.12744	0	0	4.56067	0	0	0	0	0	0	0	4.13787	0	5.86237	0
hs250	4.38616	0	3.93509	0	0	0	5.24556	0	0	0	0	0	4.28472	4.15739	0	4.16052	0	0	0	0	0	0	0	0	4.42251	0	4.55129	0	8.27904	0	8.3533	4.55752	4.6216	4.14691	4.04841	4.06956	0	0.0950948	4.6656	0	4.06298	4.20343	0	0	0	5.2227	4.2636	9.58815	4.18709
hs251	0	4.72125	0	0	0	0	0	0	4.09854	0	0	4.39738	4.11793	0	0	0	0	0	0	0	0.0881777	0	0	4.07007	4.04729	0	0	4.71897	4.4168	4.71897	0	0	0	0	0.286907	0	0	11.0256	0.163848	0	0	0.176595	0.181683	0	0	0	0	0.222755	0.137851
hs651	4.78252	0	4.18177	0	0	0	0	0	0	0	0	0	0	4.25727	0	0	0	0	4.16368	0	0	0	4.7397	0	0	0	0	8.35913	4.24109	9.12543	2.05845	3.09963	1.9726	0	0	0	0	0	4.12148	0	4.4908	0	4.12784	4.12552	0	0	0	8.85201	0
hs825	4.15181	0	4.2233	0	4.22345	0	0	0	0	0	3.89947	0	0	0	0	0	4.03905	0	0	0	0	0	0	3.46378	0	0	0	0	0	4.13194	0	0	0	0	3.94065	0	0	0	0	0	0	0	0	0	4.33724	4.64883	0	2.07739	0
hs936	1.78558	4.19654	0	8.34915	4.23534	0	4.42833	0.78505	0	0	0	0	0.0423634	2.72662	0	4.44977	9.03458	0	4.01502	0	4.43533	9.61795	0	1.25438	4.14874	0	4.56795	9.18361	13.3611	8.70649	0.168221	0.0747306	0.166003	0	4.28913	0.174985	0	4.0497	0.0518136	0	4.00691	0	0	1.36485	0	0	0	0	0
hs252	0	0	0	0	0	0	0	0	0.267213	0	0	0	0	0	0	0	2.08895	0	0	0	0	0	0	0	0	0	2.3751	0	0	0	4.25181	5.37523	4.19246	0	4.65758	0	0	0.0307102	0	0	0	0	0	0	0	0	0	0	1.2927
hs1733	4.16749	0	0	0	0	0	0	0	0	0	0	0	0	0	0	0	0	3.72148	0	0	4.21248	0	0	0	0.0160109	4.16494	0	0	5.50724	0	1.15585	0	0	0	0.573494	0	4.202	4.083	0	0	0	0	0	4.22988	0	3.85604	0	0	0
hs1734	0	0	2.75685	0	0	0	0	0	0	0	0	0	0	0	0	0	0	0	0	0	0	0	0	8.80043	0.0115005	0	0	0	0	0	0.965588	0	0	0	0	0	4.15421	4.51856	0	0	0	0	4.31602	0	0	0	0	6.84335	0
hs1345	11.9259	4.76174	0	0	0.0156976	0	0	0	0	0	4.60033	0	2.28698	0	0	2.89449	2.54795	0	0	0	0	0.725717	0.0130066	0.02497	3.24626	0	0	8.45977	9.15968	8.73783	0.0423595	0.028812	0.0312181	0	0.0499982	0.033393	0	4.06279	0.0755143	0	0.0970604	0	0.0201828	9.27499	0	0.0117983	0.0183831	0.0175849	0
mm82	0.295301	2.35746	0.0338223	0	0	0	0	0	0	0	0	1.97614	0.598061	0.134288	0	0	0	0	0	0.0530272	0	0	0	0	0	0	0	0	0	0	0	0.766838	0	0	0	0	0	0.0205649	0.190722	0	0	0	0	0	0	0	0	0	0
hs1480	0.0226041	0	0	0	0	0	0	0	0	0	0	0	0	0	0	0	0	3.06409	0	0	0	0	0	0	2.72557	0	0.490806	4.34789	0.0204305	0	0	3.89012	2.22815	0	1.15534	0	0	0.422309	0	0	0	0	0	0.0102731	0	0	0	0.506002	4.39147
hs2097	4.85556	2.61278	0	0	0	0	0.0101623	0	0	0	0.0227861	0.0108473	0.0281349	0.010986	0	0.02799	0.0765338	0	0	0	0	0.117044	0	0.0357481	0	0	0.0537708	3.68257	7.54983	0.0376306	0	0.0133078	0	0	0	0	0	0	0.0281904	0	0	0	0	7.89986	0	0	0	1.75273	1.02265
hs1909	5.63676	14.4737	0.0752596	0	0	0	0	0	0	0	0	10.594	0.358469	0.0623062	4.36293	0	0	0	0	0	0	0	0	0.0382601	0	0	0	4.10973	4.99313	4.20482	0	0.208007	0	0	0.0156664	4.11123	0	0	9.03989	4.89966	5.48328	5.73419	5.73419	4.57843	0.0250709	0.151091	5.23964	7.12032	5.33285
hs541	13.5246	0	4.39041	0	4.16304	1.75223	8.38914	0	0	0	5.08672	0	4.08416	0	0	0	0	0	0	0.798297	2.04856	1.82933	0	6.21968	0	0	4.19382	9.1189	14.7785	4.40894	4.31695	8.33794	4.50779	0	4.36051	4.70098	3.60456	4.05755	4.37538	0	4.39577	0	4.42792	5.00218	0	0	4.16052	5.0156	4.88561
hs148	5.9393	9.20763	4.63571	0	0.469707	0	4.15564	0	0	0	0	4.19586	8.31899	8.9246	4.06349	0.414996	3.93563	0	0	0	0	0	4.30764	0	4.28483	0	1.81905	4.24718	4.82102	4.00664	3.66471	7.90644	3.5843	0	7.30601	0	4.23359	1.38924	3.31165	0	6.34779	0.206462	4.02746	4.35655	0	2.82436	3.18665	4.15818	0
hs149	0	4.24976	0	0	0	0	0	0	0	0	0	0	6.75945	0	0	0	0	0	0	0	0	0	0	0	0	0	0	4.05159	8.90582	4.05159	4.30475	0	0	0	0	0	0	0	0	0	0	0.0116945	0	0	0	1.04932	0	0	0
hs150	4.54821	4.22695	0	0	0	0.122432	0.12067	0	0	0	0	0	0	0	0	0	5.03858	0	0	0.116966	0	0	0.116541	3.93121	0	0	0	0	3.66056	0	3.18997	2.94146	3.20882	0	2.70933	0	0	4.77039	0	0	0	0	0	0	0	0	0	3.76955	0
hs1967	0.0140619	0.118095	0	0	0	0	0	0	5.54283	0	0	3.9411	0.0433933	0.315086	0	0	0	0	0	0	0	0	0	0	0	0	0	0.0132138	0	0.0140422	0	5.76865	0	0	2.62195	0.0142243	0	4.48027	0.0296793	0	0.0272553	3.68512	0.0484294	0.0134543	0.0645444	0	0	0.0509252	0.0368844
hs1348	4.63357	4.43344	0	0	0.273267	0	0	0.141779	0	0.147676	0	1.4905	0	0	0	0	0	0.0115461	0.511757	0	0.138968	0	0	0.0169001	0	0	0	0	0	0	0.252395	0.0584664	0.0700821	0	0.0830321	0	0	0.328097	0.0122518	0	0	0.243044	0.167423	4.17614	0.0334215	0.188036	0	0.0390018	0
mm1319	4.27246	0	0	0	0	0	0.327111	0	0	0	0.795783	0	0.0547866	0.0217539	4.09176	0	0	0	0.0170836	0	0	0	0	3.13018	0	0	0.0439245	4.66154	5.19518	4.6216	0.0133543	0.0154274	0	0	0.487038	0	0	0.935578	0.0159686	0	0	0	0.0145616	0	0	0.0242229	0	0.0555511	0.0467169
hs1334	0	6.44374	0	0	2.34817	0	0	0	0	3.73012	0	0.886536	0	4.00877	0	0.0681264	0.0671557	0	0	0.776067	3.43758	0	3.5159	2.21876	0	0	4.29367	0	0	0	1.93142	2.57707	4.03937	0	5.73406	0	0	4.37213	1.30891	0	0	1.58394	4.11058	8.12289	4.43478	0	0	1.60916	0.116522
hs1589	4.00448	3.95581	0.0209056	0	0	0	0.828605	0	0.0119491	0	0	0.048952	0	0.0162286	0	0	0	0.0235543	0.0191123	0	0	0	0	4.09581	4.12457	0	0	0.462452	0.41915	0.417982	0.0155545	0.0139377	0.0154256	0	3.39812	0	0	1.81347	4.51616	3.89565	4.28489	0	5.37855	0	0	0	0	4.50093	4.3909
hs1567	3.74587	2.17345	3.83556	0	0	0	0	0	0	0	4.17967	1.97006	1.53835	0	0	0.345323	0.0241325	0	0	0	0	0	3.6813	0.0817902	5.27654	0	0.0765348	4.53772	4.29162	1.27915	0.886518	0.253201	0	0	0	0	3.23987	4.59057	8.55586	0	8.03349	4.19735	0.618083	4.13874	0.012757	2.65274	4.25593	9.05669	4.17955
hs1588	0.0600144	0.0595178	0	0	0	0	0	0	4.25997	0	2.40679	4.31519	0	0	0	0.0310093	0.0122538	4.41794	0	0	0	2.25079	0	1.69374	0	4.2744	0	4.79649	4.70997	4.40894	10.1408	6.47674	8.80535	3.64615	1.56575	4.2227	0	0	6.43861	2.63415	2.61306	3.174	3.92849	0	0	1.76691	3.174	3.87081	3.03853
hs1650	0.0629585	5.73736	0	0	0.0120712	0	0.0759874	0	0	0	0	4.06062	0.0376448	1.62774	0	0	0.0109442	0.0147711	0	0	0	0	0.438436	3.29691	0.0163153	0.01987	0.171676	0.0326692	0	0	0	0	3.15396	0	1.09943	0	0	1.2724	0.0375853	0	0.0313209	0.106692	0	0	0.508706	0	0	0.694792	1.11248
hs502	0	0	0	0	0	0	0	0	0	0	0	0	0.0624351	0	0	0	0.0223899	0	0	0	0	0	3.94349	0	0	0	0	0	0	0	0	0	1.79606	0	5.4485	0	3.76535	3.57092	5.56641	0	4.5272	4.48545	5.8278	0	0	0	4.91885	5.40782	4.74701
hs1053	8.25294	2.73192	0	0	0	0	0	0	0	0	0	0	0.510315	0	0	0	0	0	0	0	0	0	0	0	0	0	0.0617919	4.45471	5.33412	4.25165	4.50581	0	0	4.50134	2.35856	0	0	4.3983	0	0	0	0	0	4.05601	3.15763	4.79343	0	0	0
hs1169	0	7.867	0	0	0	0	0	0	0	0	0	0.395537	0	4.65758	0	0	0	0	0	0	0	0	0	3.7206	4.03207	0	0	0.199541	0	0	0	0	0	0	0	0	0	4.54136	0	0	0	0	0	4.13906	0	0	0	0	3.03616
hs1180	4.73518	4.58004	0	0	0	0	0	0	4.24872	4.02045	0	6.42983	0	0.720184	0	0	3.68518	0	0	0	0	0	0	0.345433	4.14388	0	0	0	4.58349	4.15855	4.2271	0	0	0	2.3055	0	0	9.7518	0	0	0	2.09571	0	4.35853	0.121368	2.80712	0	0	0
hs1104	4.54487	0	4.33442	0	0	0	4.26593	0	4.67424	0	0	2.36511	3.66815	0.171578	0	0	0	1.47667	0	0	0	0	4.07779	0	0	4.00003	0	4.24795	4.45324	2.70792	4.00478	0	3.65877	0	4.25527	0	8.32998	4.38405	2.94732	0	0	0	0	4.06449	0	0	0	0	3.34454
hs367	0	3.18507	0	0	0	0	0	0	0	0	0	0	7.6612	0	0	0	0	8.41284	0	0	0	0	0	4.5157	2.98218	0	0	0	4.74473	0	0	4.07007	0	0	4.37118	0	0	17.2219	4.56505	0	0	0	0	0	0	0	0	0	0
hs686	0.0737418	0	0	0	0	0	0	0	0	0	0	0	0	0.185414	0	0	0	0	0	0	0	0	0	4.0216	0	0	0	0.0376397	0.0376397	0.0365275	0	0	0	0	0	0	4.01323	0	0	0	4.03386	0	0	0	4.5313	4.46946	0	0	0
hs1027	8.34758	0	0	0	3.339	0	0	0	0	4.42136	0	0	2.82103	0	0	0	0	0	0	0	0	0	0	4.21072	0.053408	0	0	4.05306	3.95528	0	0	4.08938	0	0	2.61289	0	0	8.93222	0	0	0	0	0	0	0	0.554076	0	0.030575	0.0221247
hs962	0.509332	0	0	0	0	0	0	0	0	0	0	0	4.14267	0	4.17328	0	0	0	0	0	0	0	0	4.67778	0	0	4.30293	0.581586	0.581586	0.333524	0	0	4.05948	0	0	3.98802	4.11976	8.91152	4.34199	0	0	1.10359	0	0	3.58157	0	0	5.30364	0
hs368	4.34104	4.37161	0.419022	0.0107733	0	0	0	0	4.21968	0	4.1152	0	4.31158	4.50169	0	2.16811	4.40939	0	4.28768	0	2.13443	0	0	0	4.24949	0	0	4.42366	4.11182	4.00833	5.73518	8.38447	4.41908	0	0	0	0	5.62342	4.93554	3.22327	4.17134	4.47625	4.08778	0	1.86719	1.02971	4.51856	5.39794	4.46092
hs740	5.3363	0.98684	0	0	0	0	0	0	0	0	0	0	4.01055	0	0	0	0	4.60563	0	0	0	0	0	4.06349	0	0	4.5349	0	0	0	9.16801	4.29834	3.99825	0	0	0	0	4.84164	5.47108	0	6.45601	4.47625	5.007	0	4.23582	4.43719	5.02365	6.34104	5.25571
hs1088	0	4.20047	4.47237	0	4.76447	0	0	0	0	0	0	0	4.08092	0	4.98729	0	4.24843	4.40012	0	0	0	4.21325	0	4.56225	0	0	0	0	4.09228	0	0	4.33913	0	0	4.12436	0	0	1.30488	0	0	0	0	0	0	4.28735	0	0	0	0
hs1653	0	0	0.0171167	0	0	4.01728	0.0137958	0	0	4.28819	0	0.0745582	4.54061	4.8492	0	0.0114854	0.0658614	0	0	0	4.451	0	0	4.10304	0	0	0.0148433	0	0	0	3.66538	0	0	0	0	0	3.71182	5.91197	8.37692	0	0	4.21183	0	0	0	0	0	8.59998	0
hs369	4.18177	0	0	0	0	0	0	0	0	0	4.72713	0	2.66679	4.09044	0	0	5.0278	0.0580464	4.37263	0	0	4.95078	0	8.35922	4.07727	0	0	0	0	0	4.2624	4.78264	1.62688	0	7.00371	0	0	9.83707	4.39686	0	4.41794	0	0	4.74681	0	3.27094	0	0	0
hs1544	0	0	0	0	0.0109471	3.29072	4.36993	3.24189	0	0	4.14836	3.26999	0.0430718	0	0	0	0	0	0	0	3.60983	0	3.50477	8.29242	0.446667	0	0	0	0	0	0	3.04845	4.20412	0	0	0	0	4.25935	5.33048	0	5.06972	4.72424	4.99132	4.06048	0	0	4.89454	5.79683	7.33104
hs1138	0	0	0	0	0	0	0	0	0	0	0	0	0	0	0	0	0	0	0	0	0	0	0	0	4.50048	0	0	0	0	0	0	0	0	0	0	0	0	0	0	0	0	0	0	0	0	0	0	0	0.0857153
hs1566	0.709359	0.585167	0	0	0	0	0	0	0	3.93005	0	3.3591	4.53313	0	0	0	0.108231	0	0	0	0	0	0	0	4.44249	0	0	0	0	0	0.0794331	1.91113	0	0	3.21904	0	0	0.0231716	0	0	0.012366	0	1.44164	0.657615	0	0	2.80328	3.28102	2.83793
hs1636	0	0	0	0	0	0	0	0	0	0	0	0	0	0	0	1.93003	6.39984	0.0232498	0	0	0.019567	0.0207437	0	0.0671219	0	0	0	0	0	0	4.10194	0	0	0	0.334065	0	0	0	0	0	0	0	0	0	0	0	0	0.407834	0
hs1634	4.80967	0.394485	2.31036	0	0	0	0	1.57077	0	1.39587	0	0	8.00205	4.42154	0	0	0	0	0.248035	0	0	0.0121129	1.81947	0	0	0	0.310589	0	0	0	4.09259	0	0.295993	0.383656	4.00218	0	0	0.0602893	1.89469	0	0.0499225	0.0169674	4.17136	5.00656	0	3.97145	0	6.01539	4.16762
hs370	0	0	0	0	0	0	0	0	0	0	0	0	5.02183	1.97142	0	0	0	0	0	0	0	0	0.255304	0	4.87943	0	0	0	0	0	4.13727	0	4.74715	0	4.08302	0	0	0	0	0	0	0	0	4.06753	4.07469	0.214005	0	0	0
hs590	0	0	4.18376	0	0	0	0	0	0	0	0	0	0	0	0	0.023359	4.25104	0	0	0	0	0	0	0	0	0	0	0	0	0	12.3156	8.82665	8.68742	0	8.71132	0	0	4.20621	0	0	0	0	5.2564	0	0	0	0	0	0
hs371	4.82391	0	3.95488	0	0	0	0	0	6.06875	4.29757	0	0	4.09995	0	0	0	0	0	0	0	0	0	0	4.31673	0	0	0	4.52143	4.33442	8.10317	3.54761	4.86622	0	0	0	0	4.87882	4.93554	0	0	0	0	0	0	0	0	0	0	0.683328
hs372	0	0	0	0	0	0	4.06803	0	0	0	0	0	5.1065	0	0	0	4.01818	0	0	0	0	0	0	5.07878	4.43297	0	0	0	0	0	4.6038	0	4.32331	4.61083	0	4.10513	4.68077	0	9.18987	4.2082	8.65035	0	4.50575	0	0	0	0	9.12049	4.44494
hs373	4.0502	0	0	4.5719	0	0	0	0	4.60033	0	2.70175	0	0	0	0	0	0	0	0	0	0	0	0	2.07767	0	0	0	0	4.05908	0	0	0	0	0	4.5391	0	0	6.16218	0	0	0	0	0	4.18734	0	0	0	0	4.45842
hs880	4.18076	0	0	0	0	0	0	0	3.89344	0	4.14874	8.88652	0	0	0	0	0	4.66154	0	0	0	0	0	0	4.24033	0	0	4.40783	5.50308	4.03722	0	0	0.730643	0	0.861607	0	0.853869	3.18855	5.35713	0	0	0	0.178434	4.27055	0.782457	0	0	4.88646	4.11919
hs374	0	3.38454	0	0	2.0459	0	0	0	4.73993	0	8.63694	0	0	0	0	0	0	0	0	0	0	0	0	4.41686	4.90412	0	0	4.70997	4.40894	4.70997	2.44546	0	0	0.654454	0	0	0	5.97769	0	0	4.04035	4.27409	0	0	0	0	0.0740639	8.0218	0
hs851	0.0110843	0	0	4.58336	0	0	0	0	0	0	0	4.46725	0	0	0	0	0	0	0	0	0	0	0	4.50814	0	0	4.62893	4.08884	0	0	0	0	0	0	0	0	0	0	0	0	0	0	4.10726	0.0103925	0	0	0	0	0
hs797	4.23657	0	0	0	4.57635	0	0	0	0	0	0	0	0	0	0	0	0	0	0	0	0	0	0	0	0	0	0	0	0	0	2.2815	1.26592	2.18899	0	4.67905	0	6.75277	4.89424	4.67104	0	3.99643	4.40365	4.52395	0	0	0	0	4.62503	0
mm291	0	0	0	0	0	0.0611117	0.0564941	0.211004	0	0.147599	0	0	0	0	0	0	0	0	0	0.0628089	0.147311	0	0	0.0211629	0	0	0	0	0	0	0	0	0	0	0	0	0	0	0.0405109	0	0.0502536	0	0	0	0	0.799818	0	0	0
mm15	0	0	0	0	0.0588727	0	0	0	0	0	0.0102917	0	0	0	0.472103	0	0	0.0513993	0	0	0	0	0.221821	0	0.0800825	0	0	0	0	0	0.0136485	0	0	0	0	0	0	0	0	0	0	0.0706722	0	3.87268	0.200474	0	0.0723022	3.96062	0
mm1329	0	1.31323	0	0.0133514	4.69088	0	0	0	0.995214	0	0	0	2.50713	0.16453	0	0.192436	0.126305	0	0	0	0	0	0.224562	0	0	0	0	0	0.390841	0	0.843883	1.99117	0.0375586	0.0373647	1.88259	0.167388	0.224526	2.73484	1.78529	0	0.225385	0	0	0	0	0	0	1.88408	2.05263
hs1640	0	1.19477	0.0268923	0	0	0	0	0	0	0	0.872405	0	0.239387	0	0	0.0119355	0	0	0	0	4.7288	4.38312	0	0.148921	0.153488	0	1.39349	0	0	0	8.72181	0.304426	3.47815	0	8.53555	0	0	1.87837	9.12338	0	4.61089	0	0	0	0.18188	0.0685051	0	13.3497	5.05403
hs1338	0	8.68715	0	0	0	0	0	0	0	0	8.45774	0	4.96327	4.15739	5.63008	0	0	0	0	0	0	0	0	0	0	0	0	4.40894	0	4.12668	0	0	4.15989	0	0	0	4.51457	0	0.823089	0	0	0	0	0	0	0	0	4.12728	0
hs1375	0	0.0721043	0	0	0.974159	0	0.0251538	0	0	0	0	0	2.66427	0.0109052	0	4.14374	7.99639	0	0	0.151305	0	4.07361	0	0.259408	0	0	0	0	0	0	1.12112	0	0	0	1.32566	3.91904	1.18387	0.0768708	2.70422	0	2.76147	0	0	0	0	0	0	3.02384	0
hs1643	3.74208	3.96085	0	0	1.00366	4.78479	4.05605	4.67692	0	4.73964	0	0.0623795	0	0	1.65193	0	3.78996	0	0	0	4.47016	0	5.08328	2.0502	3.31408	0	0	4.01278	3.71137	3.88582	1.85545	3.91574	1.59262	0	5.19145	0	0	0	1.71231	0.684539	0.715849	1.92864	0.692161	3.82163	0	0	0.748456	2.18041	2.64247
hs1373	0	0.0156103	0	0	1.80589	0.059894	0	0	3.70595	0	0	4.35947	0.0558111	4.11976	4.48002	0	0	0	0	0	0.1547	0.354663	0	2.44258	0	2.70085	4.01028	0	4.72634	0	0	0	0	0	0	0	0	5.74146	0	0	2.08709	3.91683	3.93535	0	0	0	0	2.70073	1.51271
hs1371	8.31581	1.66494	4.35228	0	8.73919	3.68384	0	3.88271	9.01468	4.27046	4.02809	4.48149	0	0	2.92778	0	0	0	0	0	4.97563	0	8.04591	0	0.266107	0	0	0	0	0.0129234	0	0	0	0	0	0	0	0	4.08244	0	0.0145632	0	0	4.15147	0	4.37468	0	4.6038	8.988
mm109	0	2.20304	0.242795	0.0102409	4.58685	0	0	0	3.81918	0	3.93289	0	0.11391	0.0432129	0	0	0	0.452307	0	0	0	0	0	2.48423	0	0	0	0	0	7.95456	0	0	0	0	4.03716	0	0	2.0576	1.08012	0	0.93416	0	0.73125	0	0	0.0104337	0	0	0.0278848
mm879	0	0.232212	0.0535221	0	0	0.0833577	0.122196	0.0847631	0	0.096968	0	0.425205	0.02448	0	0.0955368	0	0	0	0	0	0.0989899	0	0.103877	0	0	0	0	0	0	0	8.30673	3.93452	8.01324	0	7.72164	0	0.0302228	2.13962	0.880042	0.725467	0.901886	0.903567	0.893179	0	0.34385	1.65925	0.788562	0.797785	0.769177
mm1331	0	7.098	0.0279101	0	0.0422844	0	0	0	0	0	0	0	4.4516	0.0303261	0	0	0	0	0	0	0.533325	0	0	0.306035	0.0556711	0	0	0	0	0	0	0.0630188	0.0572374	0	0.249892	0	0.01841	0.377998	0.018198	0.0174727	2.05351	0.0183404	0.0562166	0	0	7.36188	0.0167876	0.145486	0
hs1890	3.64279	4.76549	0.0107347	0	1.06768	0	1.08091	0	0.250031	0	0.643877	0	2.23651	0.075984	0	0.103922	0.0879948	1.23262	0.21552	0	0	0.243598	0	4.6475	0	0	0	3.1504	3.1504	0	0.533427	0	0	0.0219486	0	0	0	1.04162	2.32	0	0.0766946	2.16949	0	3.38507	0	1.14402	2.22637	4.60975	2.18845
hs1752	5.00381	3.10699	0	0	4.72879	0	0	0	0	0	0	0.131661	0	2.61994	3.55411	0	0	0	0	0	0	0	0	0	0	0	0	0	0	0	0	0.4966	0	0	0.92428	0	0	0.0537765	0.913022	0	0	0	0	0	2.64471	0	0	4.69576	4.72036
mm1322	0	0.430847	0	0	0	0.0451742	0.0471361	0	1.81353	0	0.135474	0.767484	1.86915	0	0	0	0	0	0	0	0.177452	0.184627	0	0.57158	0	0	0.0215535	0	0	0	0	0	0	0	0.324421	0.038295	0	0.0166762	0.102403	0	0.101923	0	0	0	1.68885	0.0863844	0	0.0974783	0.0341739
hs1397	0	1.85656	0	0	0.068458	0	0	0	0.0431777	0	0.0406089	0.0676469	0.224353	0	0	0	4.75209	0	0	0	0	0.0281896	0	0	0.0972659	0	3.03432	0	0	0	0	0	0.0548445	0	4.12381	0	0	0.0695319	0	0	0	0	0	0	0	0	0	0	0
hs1751	0	0.382226	0.046903	0	0.0456309	0	3.38626	0	0	0	0	2.25516	0.696943	0	0.0503721	0	0	0	0	3.54048	0	0	0	0	0.0195032	0	0	0	0	0	0	0	0	0	0	0	0	2.10053	0.0144274	0	0	0	0	0	0	0.0265403	0	0.0205569	0.62972
mm304	0	0	0	0	0	0	0	0	0	0	0	0.86377	0	0	0	0	0	0	0	0	0	0	0	0.0166205	0	0	0	0	0	0	0.015877	0	0.0140709	0	0.0142709	0	0	0	8.18883	0.319227	5.83008	0.340556	0	0	0	0	3.50265	4.25784	0.31377
mm708	5.02637	3.79529	0	0	0	4.08664	0	0	0	0	0	0.0460322	0	0.896156	0	0	4.40637	4.1891	0	0	0	0	4.54661	4.04128	2.01773	4.54139	0	4.05778	4.0414	3.91428	9.6665	4.88412	5.40402	0	5.65658	4.28364	5.07126	4.70504	1.72058	0	0.765546	0.723087	1.32492	3.86783	0	0	0	7.01726	1.72122
hs744	9.86836	4.68194	0	0	4.00436	0	0	0	0	0	0	0	0	0	0	5.04915	4.07572	0	0	0	0	0	0	0	0	0	0	4.2652	9.17741	8.32528	0	0	0	0	0	0	0	2.76524	0	0	0	0	4.91009	4.31695	0	0	2.22632	0	0
hs713	0	9.00961	0	0	0	0	4.02273	0	0	0	0	0	1.07383	4.21478	0	0	0	5.59007	0	0	0	0	0	8.08986	0.259497	4.56225	0	4.70997	4.40894	4.70997	0	0	0	0	0	0	0	0	0	0	0	4.02136	4.56067	0	0	0	0	4.33724	0
hs376	4.17198	17.1497	8.49668	0	0	4.91721	4.07624	0	0	4.67985	0	0	4.2668	5.50352	0	4.18977	0	4.41567	0	4.41908	4.63451	0	5.44249	0	4.23508	0	4.76447	0	4.1463	4.07883	0	0.0970565	0	0	0	0	4.13026	0	0	0	0	4.29218	0	8.56114	4.16622	8.17173	0	0	4.18898
mm1390	0	0	0	0	0	0	0	0	0	0	0	1.2476	0.0196777	0	0	0	0	0	0	0.784889	0.0852911	0.0936574	0	0.0295972	0.0404399	0	0.350632	2.24255	0	0	0	0.015034	0	0	4.02972	0	0	1.29485	0	0	1.73754	0	2.29283	0	0	4.24302	0	1.88064	0
hs1537	4.11919	0	0	0	0	3.79817	4.17292	0	4.54212	4.80414	0	4.31426	0	1.86891	0.0415183	0	0	0	0	0	4.2375	0	4.11222	4.1276	0	0	0	5.62525	0	4.06854	0	0	0	0	0.0226483	0	0	3.83854	0	0	0	0	0	4.71897	0	0	0	0	0
hs1561	4.52724	4.78516	0	0	0	3.89	9.05606	3.6649	0	6.66062	0	0	4.1253	8.74931	0	0	3.0906	0	0	3.14797	4.33582	4.0565	4.08629	1.50318	4.23307	0	4.12843	4.30452	4.69465	2.14735	4.73006	5.20377	4.71627	0	4.81487	4.31216	0.294015	0.191484	4.12462	0	0.07987	0	1.96033	5.62525	0	0	0.0784345	5.68865	0.088063
hs1013	4.05398	0	0	0	4.59189	0	0	0	0	0	0	0	2.63606	4.65035	0	4.08092	4.27246	0	0	0	0	0	0	0	0	0	10.2841	0	11.7348	0	0	0	0	0	0	0	0	0	0	0	0	0	4.80094	4.14606	0	5.10087	0	0	0
hs1384	8.96446	0	0	0	6.37426	0	0	0	0.031827	0	0	0.470616	0	0	0	0	4.26761	3.87281	0	0	2.30146	0	1.78043	0	0	0	4.21042	4.81816	0	3.58022	2.78664	6.39876	1.74408	0	6.21776	0	0	0.178061	0	0	0	4.33732	0	4.05715	0	4.54107	0	0	0
hs1726	4.54061	6.32778	0	0	0	0	0.0324014	0	1.71549	4.06965	4.52038	0	0	0	0	0.0418607	0.0381736	0	0	0	3.43016	0	0	4.48156	0	0	0	9.41549	9.11446	9.11446	0	0	0	0	0	0	0	0	0	0	0	0	0	0	0	0.0110189	0	0	0
mm18	0	5.03025	0	0	0.107862	0	0	0	0	0	0	0.135418	0.0370448	0	1.27906	2.82994	0	0	4.7373	0	0	3.8479	0	0	4.61002	0	0.040542	0	0.0188309	0	0	0.101642	0	0	0.0579801	0	0	6.62439	0.0424714	0	0	0	0.0210556	0	0.337756	3.33947	0	0.0738935	0.0318567
mm557	0	0.0147365	0	0	0.0258369	0	0	0	0	0	0	0	0	0	0	0	0	0	0	0	0	0	0	3.28235	0	0	0.0849097	0	0	0	0.325259	0.0963333	0.480705	0.527471	0	0	0	0.0234454	0.409494	0	0	0	0	0	0	0	0	0.388995	0
mm218	0	0	0.661882	0	0	0	0	0	0	0	0	0	0	0	0.330979	0	0	0.0395056	0	0.0100085	0	0	0	0	0	0	0	0	0	0	0.0371876	0.119115	0	0	0.741845	0	0	1.2425	0	0	0	0	0	0	0	0	0	0.893453	0
hs679	0	4.62525	0	0	1.28918	0	0	0	0	0	0	4.4389	0	0	0	0	0	0	0	4.12843	0	0	0	0	4.79317	0	0	0	0	0	4.16057	0.0184851	0	0	4.06586	0	0	2.13094	4.15864	4.43415	0	0	0	0	0	0	0	0	0
hs802	0	0	0	0	4.10458	0	0	0	0	0	0	4.28735	0.308695	4.15927	0	0	4.80967	4.12263	0	0	0	0	0	4.34872	0	0	4.18706	4.70774	4.40671	4.70774	0.0270686	0	0	0	0.0103664	0	0	0	0	0	0	0	0	0	0	0	0	0	0
hs375	4.27246	0	0	0	0	0	4.18776	0	0	0	0	0	0	0	0	8.24928	13.9494	0	0	0	0	0	0	0	0	0	0	0	0	4.53611	7.16214	4.01412	6.88242	0	0	0	0	4.8041	0	0	0	0	0	4.02273	0	0	0	0	0.825724
hs1440	4.26396	8.07692	0	0	0	0	0	0	0	0	4.25806	4.10127	4.38154	0	0	0	0	0	0	0	0	0	0	0.534947	0.0378286	0	1.65448	4.19538	4.19538	0	0	4.40068	8.34731	0	7.36013	0	0.946651	4.19767	0	0	0	0	0.22755	3.2761	0.529176	3.10531	0	0	5.7871
hs1464	5.47886	5.00844	0	0	0.415467	0	0	0	4.39767	0	0	0	0	0	0	0	0.451304	0	0	0	3.41631	3.41028	0	0	0	0	0	4.24033	8.27558	0	0.174112	3.38057	0.17853	0	0.254285	0.848953	1.07405	4.31985	0	0	0	0	0	8.44293	0	0	0	0	0
mm173	0	0	0	0	0	0	0	0	0	0	0	0	0	0	0	0	0	0	0	0	0	0	0	0.127735	0.0187583	0	0	0	0	0	0	0	0	0	0	0	0	0	0	0	0	0	0	0	0	0	0	0	0
hs1363	5.6347	10.385	0	0	0	0	0	0	0.0213014	0	0	4.04001	0	0	0	0	0	0	0	0	0	0	0	0	0	0	0	0	0	0	4.55913	0	0	0	8.53887	0	0	0	0.184461	0.0218838	0.0267213	0	0.0239839	4.15118	0	0	0	0.0212406	1.17842
hs1362	4.56703	4.52556	0	0	4.00568	0	0	0	4.56991	0	0.0178171	0.605146	4.97886	4.42946	0	0	0	0.0580417	0	0	0	0	0	0.299252	0	0	0	4.4366	4.22475	4.20376	2.1004	1.65307	0	0	2.97608	0	0	1.57415	0.0822543	0	0	0	0	4.20482	0	8.51958	0	1.20674	4.30413
mm152	0.638108	0.568206	0	0	0	0	0.0597699	0	2.30923	0	0	0.01241	0.276493	0	0	0	0	0	0	0.0628219	0	0	0	0	0.179306	0	0	0	0.513941	0.03262	0.128788	0	0.114756	0	0.219532	0.226008	1.82954	1.16398	0.0617398	0	0.0374327	0.0587777	0.0629488	0	0	0	0.0623876	1.19689	1.19589
hs885	4.24379	0	0	0	0	0	0	0	0.0130357	0	0	0	0	0	0	0	0	0	0	0	0	0.0380017	0	3.24151	0	0	0	4.05532	4.56065	4.11798	0	0	0	0	0	0	0	0.0151377	4.982	4.57479	4.18942	5.13022	5.22361	0	0	0	5.5012	5.58461	5.22842
hs775	8.07298	4.18623	0	0	0	0	0	4.19314	0	4.92812	0	0	0	0	0	0	0	0	0	0	4.66555	0.0168389	0	0	0.0473758	0	0	0	0	4.3121	0	1.25619	0	0	0	0	0.24811	0.0377599	0	0	0	2.13943	2.18829	0	0	0	0	2.1307	6.91858
hs560	0	0	0	0	4.46698	0	0.534709	0	0	0	0	0	0	0	0	0.430752	0	0	0	0	0	4.64402	0	4.39041	0	0	0	4.24109	4.24109	4.11577	4.09212	0	0	0	4.04096	0	0	11.9171	8.44256	4.01728	4.53725	0	4.46471	0	0	0	0	15.8947	4.02836
hs1194	15.9056	0	0	0	0	0	0	0	0	0	0	0	0	0	0	4.05413	4.82663	0	0	0	0	0	0	0	0	0	0	4.93554	0	4.03051	0.200132	0.182278	0.196542	0	0.246453	0	0	0.011069	0	0	0	0	0	9.7772	0	0	0	0	0
hs1056	4.6517	4.75696	0	0	0	0	0	0	0	0.975113	0	4.05502	8.91156	4.23582	0	0	0	0	0	0	0.0174742	0.0199799	0	3.65139	0	4.20561	0.0142736	4.08566	4.19928	0	5.38156	8.12878	0	0	4.1213	4.81812	4.96221	0	2.44326	0	4.18776	0	0	0	0	0	0	0	0
hs1011	0	0	0	0	0	0	4.09151	0	0	8.69036	0	0	0	3.89973	4.125	0.534064	4.43093	0	0	0	0	0	4.14327	0	0	0	0	0	4.38405	0	4.18901	5.63024	0	0	8.58987	0	0	0	0	0	4.19044	0	0	0	1.44011	0	0	0	4.46788
hs1141	11.5143	0	0	0	0	0	0	0	0	0	0	4.02	4.74473	0	0	0	0	0	0	0	0	0	0	0.0392389	0	0	0	6.33493	5.01131	5.35033	0	0	0	0	0	0	0	0	0.606295	0	0	0	0	14.5675	0	0	0	0	0
hs1083	0	1.08648	0	0	0	0	0	0	0	0	0	0	0	0	3.03121	0	0	4.95078	3.66274	0	0	0	1.48355	0	4.29807	0	0	0	0	0	0	0	0	0	0	0	0	0	0	0	0	0	0	4.07212	0	0	0	0	0
hs1047	4.33161	0	0	0	0	0	0	0	0	0.018949	0	0.032563	0.0169021	0	0	0	0	0	4.59346	0	0	4.25493	0	0	0	0	0	0	0	0	0	0	0	0	0	0	1.26833	0	0	0	0	0	0	5.42597	4.79317	1.19721	0	0	0
hs634	13.6691	9.09329	4.02	0	0	0	0	0	0	0	4.82391	0	0	0	0.0191775	4.18516	4.01743	0	0	0	0	0	0	3.91714	0	0	0	3.84137	4.44977	0	4.63282	0.0145652	0	0	0.0122183	0	0	4.63114	0.110591	0	0.16366	0.462076	0	4.011	0	4.37537	0.111681	0.259945	0
hs552	0	0	0	0	0	0	0	0	4.27569	0	0	0	0	0	0	0	0	0	0	0	4.17005	0	0	2.60452	0	0	0	0	0	0	0	0	5.95079	0	0	0	0	8.64147	0	0	0	0	0	0	0	0	0	4.8729	0
hs1020	0.845326	4.31785	0	0	0	0	0	0	0	0	0	0.123963	0	2.48396	0	0	3.64416	0	0	0	0	0	2.74767	4.95468	0	0	0	0	0	0	1.78278	0.934343	0.0199669	0	0.030847	0	0	5.66423	0.0215821	0	0.0213087	0.0225284	0	0	1.36422	0	0	0.018032	0
hs1195	7.80288	0	0	0	0	0	0	0	0	0	0	0	0	4.15739	0	0	0.0209475	0	0	0	0	0	0	0.02389	0	0	0	0.88002	0.538853	0.619058	2.41	2.47514	2.47441	0	2.93962	2.64214	0	0	0	0	0.0232843	3.16073	0	6.5257	0	0	0	0.0301922	3.51842
mm33	0	2.19269	0.0551222	0	0.0903033	0	0	0	2.06855	0	4.25388	0.066051	0	0.0630726	3.89701	0	0	4.66354	0	0	0	0	0	1.45418	1.67502	0	0.136868	4.78812	8.88245	4.15609	0	4.26188	0	0	6.17016	0	0	0.878107	2.08819	0	1.00506	2.11903	1.88146	0	0	0.126299	0.026067	1.56852	0.254965
hs808	0	0	0	0	6.32435	2.90082	3.21198	0	0.448827	0	0	0	0	0	0	0	0	0	0	0	0	0	3.96882	0	4.20831	0	0	0	0	0	3.69386	3.70187	3.2958	0	3.85658	0	2.90139	0	2.09769	0	0	3.97009	0	0	0	5.53422	0	0	0
hs733	0	4.41005	0	0	4.21193	0	0	0	0	0	0	0	0	0	0	0	0	5.49214	0	0	0	0.0991778	4.21705	4.44612	0	0	0	0	0	0	8.65059	0	4.00261	4.08302	0	0	0	0	0	0	0	0	0	0	0.13588	4.06569	0	0	0
hs824	4.55129	9.02326	0	0	5.05608	4.04479	4.27491	0	0	0	4.45469	4.22841	0	4.33896	0	0	0	0	0	0	0	0	5.04006	0	0	0	0	4.59829	4.59829	4.30426	0	0.0102411	0	0	0.0163019	0.159139	0.141781	0	0	0	4.4299	0	4.04274	4.14874	0	4.0662	0	0	0.0156954
hs528	8.70126	0.842531	0	0	0	0	1.7291	0	0	0	0	0	0	0	0	0	4.10403	4.03098	0	0	0	0	0	8.53757	2.08994	0	0.0406574	0	0	0	4.37986	8.38105	4.13693	0	4.0846	0.255161	0	0	0	0	0	0	0	8.27586	0	0.0104039	0	0	0
hs1701	5.2406	3.35974	4.35556	0	0	0	0	0	0	0	4.08619	3.61964	0.0944898	0	0	4.767	4.70115	0.326455	0	0	0	0	0	5.13764	3.47113	0	0	0	4.19173	0	0	0	0	0	0	0	0.0627289	2.94951	0	0	0	0	0	5.24189	0.018109	0.0214262	0	0	0
hs379	4.14813	0	0	0	0	4.00393	0	4.37779	0	4.84771	0	0	0	12.46	4.16115	0	0	0	0	0	4.4168	0	4.22403	8.72572	0	0	1.21848	0	0	0	0	0	0	0	4.43533	4.08938	0	0	4.88126	0	4.07066	4.49881	4.32938	4.20412	0	6.56871	4.69756	5.18402	4.635
hs378	0	0	0	4.4034	0	0	0	0	0	0	0	0	0	4.21467	0	0	0	0	0	0	4.70997	4.75696	0	0	0	0	4.69037	4.15304	8.80141	0	0	0	4.41794	0	0	4.59517	0	0	0	0	0	4.55596	0	0	0	5.23298	0	0	0
hs1759	0	0.142513	0	3.4197	0	0	2.10359	0	0.156269	0	0	0	0.132095	0.0195027	0	0.0259635	0.014275	5.55577	0	0	0.0259746	0	0	0	0	0	0	0	0	0	0	0.0154797	0	0	0	0.998253	0	0.0810049	0.048402	0.0520915	0	0.0315854	0	0	0	0	0	2.06747	0
hs2056	0	0.0301042	4.09583	0	0	0	0	0	0	0	0	0	0	0.0654533	0	0	4.11475	8.47217	0	0	0	0	0	2.82674	0	0	0	0	0	0	3.17162	2.45665	3.6707	0	7.32312	0	0	4.06097	1.25859	4.02104	1.50881	4.17313	6.46644	0	0	0	0	3.98809	0
hs351	0	8.4556	2.06059	0	4.32975	4.30159	4.31918	4.75899	0	4.26544	0	1.82737	1.77697	5.76881	0	0.0164209	0	5.72392	0	4.13497	4.05299	0	0	2.03012	2.84066	8.3442	0	0	0	0	13.5266	4.55843	12.8042	4.46173	9.02066	0	0	3.08075	8.72399	0	6.17497	0	0	0	0	0.603535	0	4.67351	4.09964
mm1381	0.0791394	0.0962103	0.0397393	0.599416	0.0390655	0	0	0	0.19215	0	0	0.0517763	2.06726	0	0	0	0	0.366058	0	0	1.45911	1.50481	0	3.33379	3.17432	0	0	0.0610643	0.0610643	0	0.301895	0.14344	0.21077	0.300592	4.36233	0	0	1.96882	0.771527	0.0470508	0.0537191	0	0.0371276	0.017152	0.383604	1.36839	0	0.405823	0.0657957
hs1004	4.39474	4.08575	9.01636	0	4.31515	0	0	0	0	0	0	0	4.02978	0.0175972	0	4.22548	0	0	0	0	0	0	0	3.89421	0	0	8.66082	3.7994	4.03292	0	0	0	0	0	0	0	0	4.1349	0	0	0	0	0	0	0	0	0	4.97881	0
hs1163	0	0.381957	0	0	3.26402	0.819314	0.482541	0.706367	0	0.874777	4.00647	4.97209	2.63245	0.145054	0	4.57865	4.14725	0	0	0	1.5753	0	0	4.16475	4.2937	0	0	4.422	3.51805	0	7.01452	9.05608	4.78821	0	6.32614	0	0	11.1164	5.58466	0	4.35499	4.34992	5.20839	0	4.26132	0.251508	0.667409	7.37507	0
hs1360	0.32249	0	0	0	1.40353	0	0	0	1.61484	0	0	1.08929	0	0.0136867	0	0	0	0	0	0	3.17526	0	0	3.73435	0	0	0	0	0	0	2.49182	2.69225	0.0142989	0	3.1849	4.11351	0	0	4.4318	4.08778	4.49621	0	13.5662	4.82079	0.0173906	5.20706	0	0.031353	4.04564
hs1183	0.111828	0	0	0	0	0	3.94428	0	0.2973	0	0	0	0	0	0	0	0	0	0	4.24752	0	0	8.19893	0	0	4.3439	0	0	0	0	0	0	0	0	0	0	0	4.10334	0	0	0	0	0	0	0	8.78274	0	0	0
hs1026	4.49214	4.06349	0.512882	0	0	0	4.43771	0	0	4.22142	4.29414	0	3.8936	4.2652	0	0	0	0	0	0	0	3.36824	0	4.36151	0	0.646161	3.8386	0	0	0	0	0	4.21614	0	0	0	0	1.96969	4.41117	0	4.42136	0	4.02045	0	0.350708	0.70622	4.53611	4.47366	4.29073
hs1078	10.5647	0	0	0	5.94872	0	4.02841	0	0	0	4.26761	0.0144121	0	4.38217	4.07727	4.44103	5.01329	4.63078	0	0	4.02733	5.21503	0	0	0	0	4.35343	4.22988	8.6053	4.09338	4.33724	0	0	0	4.65365	4.23399	3.6938	3.74634	4.15181	0	0	0.341917	0.340191	8.98714	0	2.0737	0.302429	4.04737	0.304805
hs1074	0	0	3.93925	0	0	0	3.60906	0	0	0	0	0	4.41202	8.47662	0	0	4.24828	0	0	0	0.366598	0	0	8.46549	4.29414	0	0	0	0	0	8.60053	4.47278	7.44363	0	4.20783	0	4.38104	4.87225	0	4.01773	4.40121	8.5889	4.2652	4.23791	0	0	4.35262	4.40782	4.20831
hs1041	9.4011	0	0	0	0.0267854	0	0	0	4.52578	4.00043	0	0	5.08355	0	0	0	0	0	0	0	0	0	0	0	4.23395	0	0	0	0	4.86967	0	0.0107963	0	0	0	0	0	3.96826	0	0	0	0	0	10.3534	0	0	0	0	0
hs313	4.12321	9.05931	0	0	0	0	0	0	0	0	5.56384	4.64016	0	0	0	4.2815	4.12727	0	0	4.28316	0	0	0	8.44237	0	0	0	8.10317	4.90309	4.19928	4.34221	9.59634	3.93829	0	5.1571	5.88471	4.24489	2.84493	0	0	0	4.05453	0	0	0	0.849341	0	4.02733	0
hs765	6.11857	0.583097	0.100416	0	0	0	0	4.42366	0	4.97062	0	0.0841009	0	0	0.721902	0	4.57769	4.56938	0	0	4.54668	0	4.00789	0	4.02503	0	4.04672	0	0	0	0	0	8.21664	0	0	0	0	0	4.95861	0	4.05355	0	0	0	0	0	0	4.59007	4.75696
hs312	8.93181	4.04672	0	0	4.10568	0	0	0	0	0	0	4.93852	1.13775	0	0	0	4.02319	5.21035	0	0	4.08619	0	0	1.54773	0	0	4.50724	4.46852	8.49989	5.33756	8.22745	0	4.50234	0	8.12876	0	0.0543688	0	0	0	0	1.68857	5.02182	5.88273	0	0	0	0	0
hs1585	8.44261	4.81531	0	0	0.351222	0	0.0374465	0	0	0	4.04576	0	0.0250688	0	4.92183	0	4.25885	0	0	0	0	0	0	5.98623	0.11404	0	0	9.74579	4.00524	4.00524	0.286398	0	0.961395	0.172099	1.96805	0	2.06408	3.86871	0	0	4.18046	0.698431	4.59176	5.47728	0	0.499243	0	0	0
hs1530	5.27121	8.5617	0	0	2.99061	0	0	0	3.59858	0	0	0	9.12846	0	0	4.08619	0	0	0	0	0	0	0	0	0	0	0	4.05526	4.09896	3.19662	0.0488123	0.123092	0.0767507	0	0.045868	0.182842	0.133068	1.96094	0.0102978	0	0	4.34067	0	4.26271	0	0	0	7.30968	0
hs1814	0	0	0	0	0	0	0.0107273	0	0	0	2.83436	0.182978	0	3.96735	0	0	0	0.0109132	0	0	0	0	0.0129172	0	0	0	0	0	0	0	0.166744	0	0	0	0	0	0.177004	3.85483	1.38132	0	1.31899	0	0.0408745	0	0	1.51095	0	0.778584	0
hs811	0	0	4.767	0	0	0	0	0	0	0	0	0	0	0	0	0	0	0	0	0	0	0	0	0	0	0	0	0	0	0	0	0	0	0	4.00305	4.68613	0	4.18776	0	0	0	0	0	0	4.75203	0	0	0	0
hs668	4.67879	0	0	0	8.73773	0	0	0	0	0	0	0	0	0	0	0	0	0	0	0	0	0	0	0	0	0	0	6.51772	0	4.11507	0	0.012542	0	0	0	0	0	0	0	0	3.95653	4.23455	0	8.24909	0	0	0	0	0
hs2000	0	4.00824	0	0	3.10156	0	0	0	0	0	0	0	0.0435205	0.221337	0	4.17127	0	0	0	0	0	0	0	3.44535	0	0	0	0	0	0	0	0	0	0	0.0125626	0	0	3.44557	0	0	0	0	0	0	0	0	0	1.36108	0
mm269	0	0	0.0512984	0	0	0	0	0	0	0	0	0	4.11477	4.04105	0	0	0	0	0	0	0	0	0	0	0	0	0	0.101833	0	0	0	0	0	0	0	0	0	0	0	0	0	0	0	0	0	0	0	0	0
hs1395	0	0	0	0	0.0453231	0	0	0	0.0602292	0.0244601	0.204704	3.10561	0.318767	0	0	0	0	4.02934	0	0.375848	0	0	0.324018	3.10383	0	0	0.0327739	0	0	0	0	0.765928	0.339678	0	0.0682365	4.00966	4.07708	0.453231	0.0361022	0	0	0	0	0	0.0506836	0	0	0	0
hs628	0	0	0	0	0	0	8.4929	0	4.1756	0	0	0	0	0	0	9.49758	8.67161	0	0	4.38708	0	0	4.30756	0	0	0	0	0	0	0	0	0	0	0	0	0	0	0	0	0	0	0	0	0	0	0	0	0.0494645	0
hs196	9.05865	13.3645	0	0	0	0	0	0	0	0	4.19667	0.012263	4.1209	0	0	0	0	0	0	0	0	0	0	0	9.72897	0	0	4.24795	4.24795	0	0	0	0	0	0	0	3.41372	0	0	0	4.23122	0	0	4.58503	0	0	0	0	0
hs112	5.25104	4.13194	0	0	0	0	0	0	0	0	0	0.220316	0.0120389	0	0	0	0.0120558	0	0	0	0	0	0	0	0	0	0	4.79632	4.76886	0	0	3.21486	0	0	3.24615	0	4.46218	1.93377	0.0606789	0.0105043	0.0608335	0	4.1831	0.146013	0	0	0	0.0510719	2.41152
hs1743	1.59763	0.657607	0.0635765	0	0.633643	0	0	0	0	0	0	0	0	0.0835547	0	0	0.0126807	0	0	0	0	0	0	0	0.111688	0	0	0.878902	0.436866	0.494387	0	2.39705	0	0	0	0	0	0	9.24158	0	4.26856	0	0	0.494365	3.43904	0	0	4.01992	0
hs1350	15.3404	8.45597	0	0	0	0	4.13739	3.6028	0	0	0	3.97417	1.33871	0	0	0	0	0	0	0	0	0	0	0	5.20381	0	0	0	0	4.58004	1.11695	1.29669	0.709395	1.23041	1.14651	1.08916	1.20289	0	4.14833	0	0	0	0	9.34507	0	0	0	4.56543	0
hs495	0	0	0	0	0	0	0	0	0	0	0	0	0	4.33196	0	0	0	0	0	0	0	0	0	0	0	0	0	0	0	0	0	0	0	0	0	0	0	5.91367	0	0	3.10868	0	3.13687	0	0	0	0	0	0
hs1950	4.23474	0	0	0	0.981615	0	0	0	0	0	0.0146642	0.708309	0	0.0120309	0.0113217	0	0	0.0150552	1.95287	0	0	0	0	0	0	0	0.757825	0	0	0	0	0	4.82799	0	0	0	0	5.21059	3.0869	0.0413101	0.0382551	0.0448098	0.0427245	4.40011	0	0.0425669	0.0386989	4.08483	0.125716
hs1866	0	1.12217	4.26556	0	0.142384	0	0	0	0	0	0	4.27878	0.0642964	3.69285	0	0	0.0139898	0.888574	0	0.59501	0	0.992635	0	0	0	0.379077	0.0126699	0.0442889	0.0332331	0.0363721	4.43415	0	0.277153	0	0.0425446	0	0	1.46528	8.8237	0	4.01069	8.01164	8.17546	0	0.457062	0	4.05554	12.3996	5.14388
hs1778	4.03597	3.92036	1.74776	4.78302	0.122618	0	4.10486	0	3.98902	4.02273	0	0	3.0728	2.62526	0.895038	0	0.304302	4.00646	0	4.11198	0	0	4.24485	0	4.0013	0	0	0	0	0	5.68066	0	2.16841	0	2.81717	0	0.0202432	4.5397	6.3518	1.2811	4.24445	6.26329	5.68447	0	0	0	1.22602	5.29424	4.11655
hs2353	0	0	0	0	0	0	0.0250356	0	0	0	0	0.932493	0.531773	0	0	0	0	0.0428132	0	0	0	0	0.0294218	0	0	0	0.0106974	0	0	0	0.0109654	0	0	0	0.172706	0	0	0	0	0	3.41516	0	0	0	0	0	0	3.24001	0.212485
hs478	4.4168	0	0	0	4.1152	0	0	0	4.5867	0	0	4.45593	0	4.11836	0	0	4.01863	0	0	0	0	0	0	0	0	0	0	4.75203	4.75203	4.24795	0	4.27246	0	0	0	0	4.06098	5.86328	0	0	0	0	0	0	0	0	0	4.23647	0
hs1006	4.80967	9.87994	0	0	4.51411	0	0	0	0	0	0	0	0	4.20343	0	0	0	1.48427	0	0.233731	0	0	0	0	4.30901	0	0	0	0	0	3.72397	8.46033	0	0	5.04932	0	2.85904	0	0.0628675	0	5.28567	0	4.00174	0	0	4.10296	0	5.0846	0
hs224	5.08249	4.18243	0	0	4.32057	0	4.61979	0	0	0	0	0	0	0	0	0	4.75696	0	0	0	0	0	0	0.216528	0.0228277	0	4.19654	4.56225	4.86328	4.71444	8.94415	4.07713	8.72052	0	14.2999	4.62525	3.93537	4.057	0	0	0	0	0	5.6968	0	2.83204	0	0	4.42829
hs225	5.73993	9.20184	0	0	0	0	0	0	0	0	0	0	0	0	0	0	0	0	0	0	0	0	0	3.96559	0	0	0	0	8.17888	0	0	0.54409	0	0	0.547041	0	0	0.483198	0	0	0	0	0	4.31426	0	2.06096	0	0	0
hs285	4.31247	4.22656	0	0	0	0	0	0	0	0	0	0	0	0	0	0	0	0	0	0	0	0	0	4.69465	4.0899	0	0	0	0	0	9.95579	13.294	5.95468	4.65365	7.03971	0	4.37263	0	0	0	0	0	0	0	0	4.30103	0	0	0
hs286	0	4.72354	0	0	0	0	0	0	4.39254	0	0	0	5.04576	0	0	4.86328	8.7721	0	0	0	0	0	4.007	0	4.32975	0	4.02641	0	0	0	0.0716285	0	0.0904216	0	0.0954551	0	0	0.0220393	3.72466	3.81254	4.9393	0	0	0	0	0	0	0	0
hs228	4.53018	12.5949	0	0	0	0	0	0	0	0	8.40827	0	0	4.35067	7.33819	4.38405	4.37675	0	0	0	0	0	0	0	0	0	0	4.44129	5.79588	4.31247	9.1485	8.797	0	0	2.57756	0	3.70122	4.72514	7.90719	0	0	0	0	4.50307	0	7.86854	0	5.68301	0
hs229	4.6038	9.07104	0	0	8.75491	0	0	0	0	0	0	4.91364	3.00199	7.59196	0	0	0	0	0	0	0	0	0	4.31368	4.12378	0	4.28735	4.84771	4.56225	4.20482	0	12.7673	0	0	13.1495	0	0	0	3.81911	0	3.86451	0.205747	4.10148	9.46791	0	0	0	8.18693	4.11938
hs520	0.0138899	0	0	0	0	0	0	0	0	0	0	0.0276157	0	0	0	0	0	0	0	0	0	0	0	0	0	0	0	0.020668	0.0228272	0	0	0	0	0	0	0	0	0	0	0	3.18256	0	0	0	0	0	0	0	0
hs324	4.08249	9.30298	0	0	0	0	0	0	0	0	0	0	0	0	0	0	0	0	0	0	4.13906	0	0	0	14.7584	0	0	0	0	0	4.51856	4.46852	4.5544	4.12378	5.90602	5.89279	5.21396	0	0	0	0	0	0	0	0	0	0	0	0
hs939	0	0	0	0	0	0	0	0	0	0	0	0.0367299	0	0	0	0	0	0	0	0	0	0	0	0	0	0	0	0	0	0	0	0	0	0	0	0	0	0	0	0	0	0	0	0	0	0	0	0	0
hs897	9.17028	0.0751149	0	0	4.04073	0	4.20412	0	4.27901	0	3.2647	0	3.99145	0	0.101071	4.37779	0	0	0	0	0	0	0	0	4.94692	0	0	13.791	9.1472	9.1472	5.85387	5.04479	5.20378	0	0	0	0	0	4.03474	0	0	0	0	0	0	0.214147	0	4.05956	0
hs326	4.37779	0	0	0	0	0	4.04096	0	4.27322	0	0	0	4.33913	4.55409	0	0	0	0	0	0	0	0	0	4.08407	8.41925	0	4.03953	0	4.09474	4.266	0	0	0	0	0	0	0	0	0	0	0	0	0	4.83863	0	0	0	0	0
hs511	9.4182	10.0756	0	0	0	0	4.21042	0	0	0	4.16304	9.33324	4.02048	0	0	4.451	4.52288	0	0	0	0	0	0	0	0	0	0	8.74124	10.1284	9.62839	0	4.04548	0	0	0	0	8.91849	0.0507272	0	0	0	0	0	9.48535	0	4.11488	0	0	0
hs513	0	0	0	0	0	0	0	0	0	0	0	0	3.75641	0	0	0	0	0	0	0	0	0	0	0	0	0	0	0	0	0	0	0	0	0	0	0	0	3.78954	0.0143111	0	0.0183454	0	0	0	0	0	0	0	0
mm195	0	0	0	0	0	0	0	0	0	0	0	0	0.09472	0.115002	0	0	0	0	0	0	0	0.251139	0	0.0603753	0.167918	0	1.29141	0	0	0	0.133259	0.0312371	0.0128945	0	0.0135839	0.384321	0	0	0.422271	0.0110407	0.0109825	0	0	0	0	0	0	0.386823	0
mm324	0	0	0	0	0	0	0	0	0	0	0	0.0510025	0.0216921	0	0	0	0	0	0	0.0196184	0	0	0	0	0.361431	0	0	0.948656	1.73595	1.36796	0	0.0299696	0	0	0.0601606	0	0	0	0	0	0	0	0	0	0	0.0406329	0	0	0
hs951	0	4.02182	0	0	0	0	0	0	0	0	0	0	0	0	0	0	0	0	0	0	0	0	0	0	0	0	0	0	0	0	0	0	0	0	0	0	0	0	0	0	0	0	4.00523	0	0	3.60936	0	4.96147	0
mm1351	0	0	2.89925	0	3.45608	0	0	0	0.0614824	0	0.355815	0	1.0855	0	0	0	0	0	0	0	0	0	0	0.0124949	0.0536775	0.204087	0	0	0	0	0	0	0	0	0.0127779	0	0	0	0.040065	0	0.0303541	0.624178	0.237789	0	0	0.29281	0.0531001	0.252874	0.247869
mm64	0	0	0.0712588	0	0	0	0	0	0.844672	0	0	0.315615	2.40121	0	0	0	0	0.264532	0	0	0	0	0	4.12437	0.0566679	0	0.0116209	0	0	0	4.26013	0	4.28316	0	0	0	0.101822	2.8053	0	0	0	0	0.148014	0	0	0	0	0.0106829	0
hs328	0	4.74958	0	0	0	0	0	0	0	0	0	0	0	4.07654	5.00833	0	0	0	0	0	0	0	8.86042	0	0	0	0	0	0	0	0	0	0	0	0	0	0	5.06702	0.23644	0	0	0	0	0	0	0	0	0	0
mm445	0	2.43948	0	0	8.63132	0	0	0	0	0	0	0	5.47198	0	0	0	3.49707	1.52861	0	0	0	4.5463	0	0	0	0	2.62601	0	0	0	4.48304	0	4.4331	0	0	4.08654	0	0	3.15901	0	3.13129	0	0	0	0	0.0896268	0	0	0.516545
mm916	0	0	0	0	0	0	0	0	0	0	0	0	0.0270182	4.74897	0	0	0	0	0	0	0	0	0	0	0	0	0	4.20653	4.20653	0	0.587005	0	0	0	0	0	2.06694	1.43594	4.22319	0	0	0	0	0	0	0	0	0	0
hs841	8.4835	4.6577	0	0	0	0	0	0	0	0	0	0.796665	0	0	0	0	0	0	0	0	0	0	4.46218	0	0	0	0	4.70774	4.40671	4.70774	0	0	0	0	0	0	4.05899	5.02771	0	4.01773	0	0	0	4.77469	0	0	0	0	4.24795
hs934	4.28483	0	0	4.76826	0	0	0	0	0	0	0	3.72893	0	0	0	0	0	0	0	0	0	0	0	4.34237	0	0	0	4.05306	4.05306	0	0	9.20762	4.54351	0	4.44733	0	0	0	0.0100937	0	0	0	0.0111908	0	4.04763	5.23452	0	4.20482	0
mm447	0	0	0	0	0	0	0	0	0	0	0	0	0	0	0	0	0	0	0	0	0	0	0	0	0	0	0	0	0	0	0	0	0	0	0.0108694	0	0	0	4.0224	0	0.387231	3.85953	0	0.0260303	0	0	0	3.6161	0.401112
mm448	4.70997	9.31252	0	0	0.0177826	0	0	0	0	0	0	1.41589	8.17457	0	0	0	0	0.0575221	4.0521	0	0	0	0	0.134626	0	0	0	0	4.35556	0	0	3.94418	0	0	4.37243	0	0	0	5.75945	0	4.5391	4.49894	5.80688	0	1.88623	8.25505	4.96658	5.87115	5.06559
hs1032	0	4.22915	0	0	0	0	0	0	0	0	0	0	0	0	0	0	0	0	4.08852	0	0	0	0	3.90199	0	0	0	4.22185	4.92445	4.41117	1.3698	2.45629	1.31313	0	1.88316	0.0136693	0	0.0424011	0	0	0	0.0352596	0	0	3.77404	4.18127	0	0	0
hs1221	8.90172	8.66588	0	0	0	5.30016	4.9393	4.1945	0	4.49757	0	0	0	0	0	0	0	0	0	4.81816	4.68403	4.02086	5.69897	0	4.18111	0	0	8.6711	14.1038	4.90597	0	0.104719	0	0	0.0204331	0	0	0.0228341	0	0	0.0560159	0	0	4.74232	0	0	0	0	0
hs1087	5.04191	4.0888	0	0	0.0181806	0.0365033	0.0212591	0	0	0.0224053	0	3.91192	0	0	0	0	0	0	0	0	0.0221964	0	0.0147939	0.538952	0	0	0	0	4.6968	0	0	0.0132082	0	0	0.0148586	0	0	0	5.07935	0	4.05208	0	0	4.43961	0	4.05223	4.03593	5.25244	4.06994
hs1236	4.70333	4.4828	0	0	0	0	0	0	0	0	0	0.0914683	0	0	0	0	0	0	0	0	0	0	0	4.02102	0	0	0	5.2951	4.93851	0	4.45515	0.905401	0	0	1.64405	0	0	3.81919	5.90033	0	10.6114	5.55503	5.68668	3.63174	0	0	1.10861	11.4066	6.23138
hs1551	4.39362	2.31109	0.0185963	0	0	4.32698	4.22448	4.18709	0	4.451	0	4.21824	0	0	0	0	0	0.0106384	0	0	4.13371	0	4.01909	3.9114	0	0	0.4187	4.70774	4.73755	4.86012	0.0242539	0	0.0108362	0.111026	0.0146972	0	0	5.50086	4.2142	0	4.26092	0	4.26259	0	0.178756	0	0	4.87485	4.88852
mm449	0	4.32911	0	0	0	0	0	0	0.128263	0	0	0	0	0	0	0	0	0	0	0	0	0.0290498	0	0	0	1.07379	0	17.9223	13.1672	18.077	0	0	0	0	0	0	0	3.99581	0	0	0	0	0	0	0	0	0	4.2644	0
hs672	0	5.23958	0	0	4.22695	0	4.26543	0	0	0	0	4.00393	4.04403	8.79932	0	2.02493	0	0	0	0	0	0	0	4.284	4.44014	4.10791	0	0	4.23582	0	0	0	4.07212	0	4.05852	0	0	4.69465	0	0	0	0	4.87536	0	4.06773	0	0	4.30016	0
mm418	0.0700788	9.33557	0.244357	4.82651	0.722547	0	0	0.0229566	4.27838	0	0	0	0	0.323533	0	0	0	0	0	0	0	0	0.0302377	0.661166	3.90945	0	0	3.43579	3.57291	3.33813	0	0.045353	0	0	0.0345223	0	0.0204776	9.15227	5.67366	0	4.83863	4.48545	4.19111	0	4.32548	0.546989	4.34008	6.39362	4.60906
mm28	0	0	0	0	0	0	0	0	1.50242	0	0.602136	2.00188	2.09146	0	0	0	0	0.10892	0	0	0	0	0	0.04526	0	0	0	0	0	0	0	0	0	0	0	0	0	0	0.0533031	0	0.0447663	0	0	0	0.0105108	0.0138803	0	0	0.0604349
mm419	0	0.756618	0	0	0	0	0.0765364	0	0	0	0	3.66536	0	0	0.697064	0.0256315	0	0	0	0	0	0	0	0	0	0	0	0	0	0	0	2.85654	0	0	2.01616	2.55758	0	0	0	0	0	0	0	0	0	0	0	0	0
mm420	0	0	0	0	0	0	0	0	0	0	0	0	3.44832	0	0	0	0	0.524239	0	0	0	0	0	0	0	0	0	0	0	0	0	0	0	0	0.0517794	0	0	3.73242	0	0	0	3.6647	0	1.42687	0	0	0	0	0
mm422	8.66564	0.805938	0	0	0	0	0	0	0	0	0	0.273646	1.71854	0	0	0	0	0	0	0	0	0	0	0.853177	0.288296	0	0	3.73074	5.86879	6.99632	0	0	0	0	0	0	0	0.0185058	0	0	0.0160263	0.853938	3.41627	6.67084	0	0	0	0	0
mm423	0	0	0	0.0207921	0	0	0	0	0	0	0	0	3.38687	0	0.012624	0	0	0	0	0	0	0	0	0.316939	0	0	0	0	0	0	0.0174085	1.17133	0	0	0	0	0	0	2.09408	0	0	0.0945529	0.658447	0	3.90468	0.956038	0	2.11394	2.28235
mm424	0	0	0	0	0	0	0	0	0	0	0	4.90531	0	0	0	0	0	0	0	0	0	0	4.61086	0	0	0	1.45254	0	0	0	0.0531822	0	0.0409119	0.0450585	0.0374264	0.0326678	0.0340975	1.48435	0.634313	0.492352	0.623323	0.530106	0.651426	0	0	0	0	2.22076	0.471462
hs1382	0.12283	4.24272	0	0	0	0	0	0	0	0	0	0.782552	0.468	0	0	0	0	0	0	0.0319953	0	0	0.0398345	0	0.317389	0	0	0.109432	0.104071	0	0	0.206593	0	0	0.978396	0	0	0.768291	0	0	0	0	0	0.124184	0.0420996	0.0409133	0	0	0.271957
hs2237	0	0.352986	0	0	0	0	0	0	0	0	0	0	0.16316	0.0480391	0	0	0	0	0	0	0	0	0	0.408057	0	0.0570958	0	2.94311	0	0	0	0	0	0	0	0	0	0.0177784	0.0253303	0	0.0340622	0	0	0	0.0176292	2.12321	0	0.0225429	0
mm30	0	0	0	0	0	0	0	0	0	0	0	0	4.61154	0	0	0	0	0	0	0	0	0	0.0775404	0.809718	2.55488	0	0.053648	0	0	0	0	2.40395	0	0	3.5335	0.0124574	0	0.0638873	0.0262397	0	0.0298506	0	0	0	3.39257	0.235636	0	0.0280652	0
mm270	0	0	9.32443	0	0	0	0	0	4.14431	0	0	5.07883	4.28316	0	0	0	0	0	0	0	0	0	0	0	0	0	0	4.02826	0	0	0	0	0	0	0	0	0	4.2612	0	0	0	0	0	2.07118	0	0	0	0	0
hs2048	0	0	0	0	0	0	0	0	0.0177968	0	0	0	0	0	0	0.100701	0	0	0.149511	0	0	0	0	0	0	0	0	0	0	0	0	0	0	0	0	0	0	0.014405	0	0	0	0	4.09553	0	0.12976	0	0	0	0
hs826	0	4.66555	0	3.97287	0	0	0	0	4.72125	0	0	4.08991	0	0	0	0	0	0	0	0	0	0	0	0	0	0	0	0	4.20831	0	0	3.14269	2.59059	0	0	0	0	6.49757	0	0	0	0	0	0	0	0	0	0	0
mm320	0	0.834284	0	0	0	0	0	0	2.00906	0	0	0.0709524	0.0325213	0	0	0	0	0	0	0	0	0	0	0	0.145865	0	0	0	0	0	0	0	0	0	0.0601412	0	0	0.125344	0	0	1.08798	0	0.358278	0.0177016	0.133891	0.736396	0	0	0.082713
mm1325	0	0.0485346	0	0	0.155007	0	0	0	0.0249863	0	0.177708	0	0	0.0808052	0	0	0	0	0	0	0	0	0	0	1.66977	0	0	0	0	0	0	0	0	0	0.509237	0	0	4.25457	0.0311975	0	0.473658	0.0102309	0.890581	0	0	1.3889	0	0.0308558	0.0823637
hs1328	11.5814	19.9707	0	0	2.84127	0	0	0	0	0	8.95468	4.01526	0.0128258	0	0	0	0	4.19805	0	0	0	3.29177	0	0	0	0	0	5.60906	5.0278	4.64397	4.30539	0.28694	0	0	4.60473	0	0	0	0	0	0	0	4.84771	13.9008	0	4.26669	0	0	0.919388
hs876	4.14267	0	0	0	0	0	0	0	0	0	4.23062	0	0	0	4.01946	0	0	0	0	0	0	0	0	0	4.13111	0	0	0	0	0	1.63633	5.00128	1.37132	0	2.03888	0	0	0	0	0	0	0	4.00855	4.23807	0	0	0	0	0
hs1963	0	3.47074	0.303276	0	0	0	0	0	0	0	0	0.0320225	0.16788	0.0152134	0	0	0	0	0	4.04035	0	0.644808	0	1.85764	0	0	0.0105023	0	0	0	0	0	0	0	0	0.0132022	0	1.32923	0.0726772	0	0.0511851	0.199439	0.427686	0	0	0	0.0547877	0.0490421	0.0539824
mm194	0	0	0	0	0	0	0	0	0	0	0	0	0	0	0	0	0	0	0	0	0	0.0294049	0	0.0356767	0	0	0	0	0	0	0	0	0	0	0	0	0	0.158471	0	0	0	0	0	0	0.0280189	0.533545	0	0	0
mm238	0	0	0	0	0	0	0	0	0	0	0	0.351425	0	0	0	0	0	0	0	0	0	0	0	0.683842	0	0	0	0	0	0	4.24945	0	0	0	0	0	0	3.09947	0	0.0735296	3.02486	0.0720097	0.0701775	0	0	0	0.0112804	2.41994	0
hs186	4.44676	0	0	0	0	0	0	0	0	0	0	4.70333	0	0	0	0	0	0	0	0	3.74734	0	0	0.98331	0	0	4.04964	4.46725	0	4.84164	8.65554	5.10182	4.63763	4.13371	4.88007	3.78775	4.91622	0.0201974	4.70997	4.28316	4.53611	4.43297	4.37366	4.03433	0	0	0	1.9719	2.81082
mm1354	0.814005	0	0.0183189	0	0.0116125	0	0	0	0	0	0.0103314	0	0.469707	0	0.0476438	0.570346	0.459656	0	0	0	0	0	0.0708691	0.0884635	0.0648173	0	0.111118	0	0	0	0	0	0	0	0.0633626	0	0	0	0.578606	0	0.523301	0	0	0.0193008	0	0.668051	0	3.35808	0
mm716	4.13893	9.11149	0	0	0	0	0	0	0	0	4.28702	0	4.53165	0	4.2204	4.28839	0	0.0403334	0	0	0	0	0	0.76467	0	0	0	4.57675	4.26841	4.42289	0	2.07166	0	0	0	0	0	3.51276	0.167808	0	2.0276	5.1153	0.126349	4.65955	4.57208	0	3.06743	1.58306	0.136875
hs1108	0	0	0	0	0	0	0	0	0	0	0.800837	0	6.07007	0	0	0	0	0	0	0	0	0	0	0	4.19586	0	0	4.22185	4.11014	4.18549	0	0.0359835	0	0	0.0778793	0	0	1.17386	0	0	0	0	0	0	0	0	0	4.21538	0
hs1015	4.09474	9.22435	0	0	0	0	0	0	0	3.78462	0	0	0	0	4.37903	0	0	0	0	0	0	0	0	0	4.4045	0	8.30214	4.26043	4.26841	0	0.0174756	0	0.015831	0	0.0179294	0.0161743	0	0	4.55596	0	4.1107	4.12148	4.7167	4.34486	0	3.76149	4.5817	4.87943	4.46092
hs987	0	12.2449	0	0	0	0	0	0	0	0	4.22244	4.451	0	0	0	0	0	0	0	0	0	1.13588	0	1.68137	12.8223	0	0	0	5.33348	0	4.53947	8.75565	9.13114	4.74926	0	0	0.0196748	0	0	0	0	0	0	0	4.33068	0	0	0.194722	0
hs1103	4.27737	0	0	0	0	4.15677	4.25806	0	0	0	0	0	0	0	3.97999	0	0	0	0	4.61618	0	0	0	0	0	0	0	4.08566	8.43064	0	4.12843	0	0	0	0	0	0	3.97098	0	0	4.47514	0	4.06349	0	0.0192272	3.33237	0	0	0
hs317	0	0	0	0	4.35067	4.04672	0	0	0	4.10958	4.20901	5.85387	0	0	0	0	0	0	0	4.01547	4.85699	4.60906	4.31426	0	0	0	0	0	0	0	0	0	0	0	3.99893	0	0	4.19723	0	0	0	0	0	4.35381	0	0	0	0	4.60555
hs1000	4.43145	4.42251	0	0	0.353865	0	0	0	8.5223	0	4.60555	0	0	3.71284	0	0	4.42679	0	0	0	0	0	0	2.00775	0	0	0	0	0	0	0	0	0	0	0	0	0	0	9.00252	0	4.35131	1.8955	4.1617	4.05898	0	0	0	9.51858	0
hs1017	0	0	0	0	0	0	2.89855	0	0	0	0	0	0.0867951	8.80836	0	4.23732	0	0	0	0	0	0	2.74659	0	0	0	4.22475	4.49894	8.02645	4.12722	0	0	0	0	0	0	0	0	0	0	0	4.64975	0	8.92775	4.22185	0	0.0167166	4.16685	0.016307
hs1095	4.09205	4.31045	0	0	0	0	0	0	0	0	4.66354	4.78781	0.520159	0	0	0	0	0	0	0	0	0	0	4.59346	0	0	0	0	4.10292	4.29328	4.26122	4.64975	4.47237	0	4.90309	3.16762	0	2.61456	0	0	0	0	0	4.24795	0	0	0	0	4.04287
hs1099	0	4.29499	4.03386	0	0	0	5.37161	0	0	0	0.0180769	4.43037	0	0	8.69795	4.38195	9.42199	0	0	0	0	4.17587	0	8.50225	4.16622	0.067487	5.07469	0	0	0	4.03433	0	0	0	0	1.75884	0	8.98367	0.124489	0	0	4.66756	4.09963	0	4.06803	0.280282	0	4.88387	4.11238
hs316	0	4.32606	0	0	0	0	0	0	0	0	0	0	0	0	4.32239	0	0	0	0	0	0	0	0	0	0	0	0	0	2.13218	0	0	0	0	0	4.21112	0	0	0.453058	4.2652	0	0	0	0	0	0	0	0	4.35262	0
hs1102	4.16494	4.01305	0	0	0	0	0	0	0	0	0	5.40103	0.305207	0	0	0	4.0469	6.17922	4.13787	0	4.00966	0	4.17225	6.42806	4.36802	0	0	0	5.49894	0	7.36524	0	2.74518	0	4.23359	0	0	4.59134	5.02091	0	4.52143	4.29243	0	4.20691	8.09179	0	0	5.61439	4.68403
hs818	6.39081	1.4263	0	1.24708	0	0	0	0	0	0	4.74473	0	4.86967	4.15739	0	8.53556	4.29499	4.03858	0	0	0	0	0	4.93119	0.0268754	0	0	4.05306	4.10624	0	0	0	0	0	0	0	4.48812	0	4.10902	0	0	0	0	4.48149	0	0	0	8.38024	0
hs1030	6.62765	0	0	0	0	0	4.52724	0	0	0	0	4.02872	5.04866	0	0	12.2655	5.25337	0	0	0	0	4.12901	0	9.52423	0	0	0	5.3328	10.7378	1.19774	0	1.34247	0.957693	0	2.62007	0	0	3.80433	0	0	0	0	4.15864	9.662	4.09691	0	0	2.08221	1.72724
hs185	2.1282	0	0	0	0	0	0	0	4.12321	0	0	0	0	4.2446	0	0	0	0	0	0	0	4.24682	0	0	0	0	0	0	0	0	0	0	0	0	0.0119127	0	2.01479	0	1.46507	1.40655	1.64326	0	3.37363	0	0	0	0	5.67193	0
hs788	0	4.54086	0	0	0	0	0	0	0	0	0	4.01368	0	0	0	0	4.12492	0	0	3.83245	0	0	0	4.49214	0	0	0	2.02366	0	0	0	0	0	0	0	0	2.40201	0	0	0	0	0	0	0	0	0	0	0	3.87817
hs314	0	0	4.34679	0	5.57214	0	4.11182	0	4.29328	0	5.3984	4.08778	4.08991	4.09151	0	0	0	0	0	0	4.2815	4.25649	0	4.74232	0	0.01117	0	0	0	0	13.035	3.33863	4.28483	0	8.93496	4.73857	0	13.6981	0	0	0	0	0	0	4.01909	0.736979	0	8.44509	4.21254
hs1794	4.41567	0	0	0	0.127312	0.0416683	0	0	0	0	0.0119671	5.40387	1.02675	0.175988	4.18664	0.271167	0	0.0423713	0	0	0	0	0	0	4.80382	0	1.65263	1.45614	0	0	0.0334541	3.46105	2.8895	0	4.39234	5.00227	0.909789	0.15286	10.1657	4.3536	10.114	4.20631	0.0527218	4.35754	0.384252	0.0214116	0	10.8507	4.15597
mm160	0	0.278559	0	0	4.12536	0	0.0104089	0	0.0349769	0	0	3.98547	0.0132973	0	0	0	0	0	0	0	0	4.42015	0	2.98639	1.35675	0	0.0254228	0	0	0	0	4.25038	0	0	4.40836	0	0	0	2.66742	0	2.92057	1.86051	0.0119059	0	0	0	0	6.36522	0
hs600	0	8.64639	0	0	0	0	0	0	2.57114	0	4.30715	0	0	0	0	0	0	0	0	0	4.87615	4.57187	0	0	4.77713	0	0	0	0	0	0	0	0	0	0	0	0	5.01101	0	0	0	0	0	0	4.25944	0	0	0	0
hs402	8.35651	0	4.00626	0	3.25691	3.7826	4.50894	0	4.33362	0	0	4.5817	0	4.69897	0	0	0	4.24949	0	4.40618	0	4.75586	4.85872	0	0	0	0	6.39068	5.1451	0	0	0	0	0	0	0	0	0	4.03947	0	4.18545	0	0	0	0	4.07118	0	0	0
hs675	0	0	0	0	0	0	0	0	0	0	4.25885	4.10513	0	4.47625	4.87615	0	0	0	0	0	0	0	0	0	4.25414	0	4.43652	0	0	0	0.173367	0.40223	0.242252	0	0	0	0	8.7876	0	0	0	0	0	0	0	0	0	0	0
hs403	0	4.29499	0	0	0	0	0	0	0	0	0	0	4.74965	0	0	0	0	0	4.21487	0	0	0	0	0	0	0	5.10458	0	0	0	5.05743	4.2161	0	0	0	0	0	0	0	0	0	4.37855	0	0	0	0.0217904	0	8.40112	0
hs663	0	0	0	0	0	0	0	0	0	0	0	3.26428	0	0	0	0	5.38112	0	0	0	0	4.01909	0	4.28988	0	0	0	0	0	0	8.65226	4.11014	0	0	4.1891	0	0	8.45371	0.737072	0	0.664737	0	4.6216	0	0	4.21157	0	2.6264	0
hs404	9.4321	4.56067	2.85657	0	0	0	4.85078	0	0	0	0	2.29249	4.04639	0	0	0	4.4908	0	0	0	0	0	0.700865	0	4.13312	4.42513	0	4.4168	4.26043	4.24109	4.22621	4.25416	0	0	4.35421	0	0	0	0	0	0	0	0	13.1347	0	0	0	0	0
hs407	0	0	0	0	0	4.79588	4.07624	4.52433	4.43415	4.51145	0	0	12.5424	4.91721	4.2887	0	0	0	0	0	8.62234	4.12657	4.86646	0	0	0	0	0	4.11862	0	0	4.25104	0	0	4.28483	0	0	4.3279	0	0	4.10004	0	0	0	0	0.621094	0	4.156	0
hs409	0	0	0	0	4.06347	0	0	0	0	0	0.114493	4.19791	9.89744	0	0	0	0	0	0	0	0	0	0	0	0	0	0	0	1.67278	0	5.03453	5.06651	5.11019	4.21715	4.81816	5.13136	12.7957	0.527295	4.72584	4.07417	4.48812	8.75185	4.63264	0	4.3536	0	4.87943	5.3439	4.62342
mm1380	4.17401	8.16121	0	4.74715	4.87469	2.42547	0	0	1.27471	2.67488	0.0617678	8.96838	4.24307	0.0393111	0.354945	1.40131	1.48413	0	0	0	0	0.105096	4.62997	4.30687	4.098	0.0282417	4.35067	4.23232	12.2907	2.48576	4.11634	5.28651	8.26673	0	1.6522	0	8.24381	4.77211	4.43397	0	0	3.82982	4.24695	4.69269	4.07366	9.7313	0	4.58593	0
hs2256	0	6.25923	0	0	8.7949	0	0	0	0	0	0	4.41972	1.24226	0	0	0	0	0	0	0	0	0	0	5.37942	0	0	0	0	0	0	10.2029	4.21656	10.0713	0	5.76898	9.15236	8.59495	5.03909	0	0	0	4.07632	0	0	2.98442	8.53019	0	0	4.13092
hs1802	0	0	0	4.15357	0	0	0	0	4.32733	0	0	0	0	0	0	0	0	0	4.44733	0	0	5.09691	0	4.08018	1.38047	0	4.01657	4.05159	0	0	4.23257	4.08145	0	0	4.91364	3.99535	0	0	4.45593	0	4.02273	0	0	0	4.63451	0	0	13.1734	4.92812
hs617	0	0	0	0	0	0	0	0	0	0	0	0	0	4.91009	0	0	0	0	0	0	1.9763	0	0	0	0	0	0	0	0	0	0	0	0	0	0	0	3.43266	4.41764	0	0	0	0	3.36375	0	0	4.05552	0	0	0
hs777	0	5.25146	0	0	0	0	0	0	4.28619	0	0	4.81454	0	4.22915	0	0	0	3.33856	0	0	0	0	0	0.18193	0	0	0	0	0	0	0	0	0	0	0	0	0	4.61439	0	0	0	0	0	0	0.125556	0	0	4.90221	0
hs544	0	0	0	0	4.21254	4.21896	0	0	4.14752	0	0	0	0	0	0	0.0147757	0.0169252	0	0	0	0	4.55752	0	0	9.85467	0	4.08249	0	0	0	0	0	0	0	0	0	4.00216	0	8.04792	0	0	4.24336	4.57187	0	0	0	4.58503	8.90152	8.11483
hs649	0	0	0	0	0.761335	0	0	0	0	9.10441	0	0	0	0	0	0	0	0	0	0	0	0	0	9.11387	0	0	0	4.71897	4.71897	4.4168	4.13966	4.14086	0	0	4.14691	0	0	0	4.9393	0	8.2736	4.82681	4.03433	4.33255	0	0	4.03245	5.06651	8.56659
hs568	0	0	4.18342	0	0	0	0	0	0	0	0	0	0	0	0	0	0	0	0	0	0	0	0	0	0	0	0	0	0	0	0	0	4.89922	0	0	0.790965	0.70586	8.66159	0	0	0	0	0	0	0	4.41083	0	4.02411	0
hs760	0	0	0	0	0	0	0	0	0	0	0	0	0	0	0	0	0	0	0	2.24215	0	0	0	0	5.30548	0	0	4.46768	4.18161	4.46768	0.333141	0.262185	0.283272	0	0.504704	0	0	0	0	0	0	0	3.00465	0	4.4168	2.11276	0	0	0.158133
hs534	4.4045	0	0	0	4.19928	0	4.08959	0	0	4.87615	0	0.272199	0	4.08872	0	0	0	0	0	0	4.72125	0	0	0	0	0	0	0	0	0	4.1261	0	0	0	0	4.21628	0	4.63021	7.91319	0	3.13173	4.08302	4.20831	4.15739	0	0	0	11.729	4.38195
hs410	0	4.09195	0	0	0	0	4.10018	0	0	4.07007	0	0	0	0	0	0	0	5.38828	0	0	0	0	0	8.6601	0	0	0	0	0	0	4.44021	9.06367	4.7362	0	5.44654	4.27819	4.007	4.16749	0	0	0	0	0	0	0	0	0	0	0
hs609	5.16776	4.75203	0	0	1.96609	2.72473	0	0	0	0	0	13.3347	4.27034	0.191646	0	4.93728	5.27327	0	4.02641	3.82951	0	3.18484	3.01547	4.34008	4.46188	0	0	4.51414	8.65399	4.22549	4.02319	0	8.872	0	0	0	0	0	8.46271	0	7.32673	8.04315	10.0466	4.06956	0	0	4.72923	17.6709	9.24776
hs719	0	0	0	4.01324	0	4.8729	4.68613	0	4.11464	4.42136	0	0	0	0.0598991	0	0	0	0	0	4.5867	4.42481	8.35128	4.72816	0	4.14062	0	4.70997	0	0	0	0	0	0	0	0	0.0468887	0	0	6.10121	4.1514	4.96608	4.94637	8.96798	0	0	0	4.91672	5.14634	4.94647
hs773	0	4.13253	0	0	0	0	0	0	1.85908	4.03105	0	0	4.01323	4.22915	0	0	0	0	0	0	0	0	2.55999	2.40143	3.89824	0	0	0	5.04654	0	0	0	0	0	0	0	0	1.98174	0	0	0	0	0	4.15058	0	0	0	0	0
hs805	0	0	0	0	0	0	0	0	4.70115	0	4.25958	0	0	2.9635	4.53421	2.41863	1.4901	0	0	0	3.61527	0	0	0	0	0	0	0	4.26922	3.60745	0	4.2767	4.35754	0	4.25015	4.00105	4.83581	8.37144	0	0	0	0	0	0	0	0	0	0	4.01757
hs1386	5.3068	4.52478	0	0	0.110526	0	0	0	0.208303	0	0.0163483	0	0	0	0	0	0	0	0	0	0	0	0	3.38421	0.765331	0	5.71283	0	4.26136	0	4.09294	0	0	0	0	4.04074	0	0	0	0	0	0	0	5.45102	0.0465346	0	0	0	0.0104697
hs803	3.20104	4.24109	0	0	0	0	0.0144254	0	5.24865	4.07993	0	0	0	0	4.50585	0	4.19314	0	0	0	0	0	0	4.76447	4.25481	0	0	0	0	0	8.29017	3.96597	0	0	4.07718	0	0	0	5.42104	4.73796	5.34063	4.31811	0	0	0	0	0	8.95781	4.79986
hs580	4.20971	0	0	0	0	0	0	0	0	0	4.16685	4.23591	2.32645	0	0	0	4.02826	0	0	0	0	0.0680505	0	0	4.29585	0	0	0	0	0	0	0	0	0	0	0	0	4.10812	0	0	0	0	0	0	0	0	0	0	0
hs551	0	4.02578	0	0	0	4.19791	4.41454	0	0	4.06048	4.03452	0	0	0	0	0	0	0	0	4.39147	4.37206	8.95576	0	0	4.5391	0	0	0	0	0	2.99674	4.09909	0	0	0	0	0	4.48545	2.9668	2.85414	2.88123	2.35605	4.5817	0	4.29328	5.10458	0	6.87088	0
hs549	0	0	0	0	14.1258	0	4.13847	0	4.04519	0	0	4.53165	4.07777	0	0	0	0	4.07676	0	0	0	1.33006	0	4.22068	0	0	0	0	0	0	4.17752	0	0.208144	0.219819	0.245598	0.212781	0.143773	4.0846	3.87311	0	0	0	0	4.82681	0	0	0	4.47134	3.69977
hs411	0	4.14086	0	0	0	0	0	0	0	4.01189	4.21112	0	0	0	0	0	0	0	0	0	0	0	0	0	0	0	4.00656	8.44229	8.68441	4.24109	0	0	0	0	0	0	0	0	3.46258	0	3.47377	1.8743	3.9099	0	0	4.92698	0	3.89372	0
hs691	4.05948	0	8.22909	0	0	0	0	0	0	0	0	5.31426	0	0	4.27084	0	0	0	0	0	0	0	4.47237	14.4898	4.86646	0	0	4.4168	9.48897	4.24109	0	0	0	0	0	0	0	13.1985	4.16052	0	0	0	0	4.16813	0	0	0	0	0
hs412	4.04915	0	0	0	4.32514	0	0	0	0	0	0	0.0121656	0	4.68403	0	0	0	0	0	0	0	0	0	0	0	0	4.18243	4.34775	5.05306	0	0	4.2541	0	0	0	0	0	5.61083	0	0	0	4.04001	0	4.82974	0	0	0	4.22621	0
mm667	0	0	0	0	0	0	0	0	0.265921	0.158294	0.17537	1.44405	0	0	0	0	0	0	0	0	0	0.109238	0	0.651106	0	0	0.968825	0	0	0	0	4.12391	0.214797	0	4.00277	0	0	0.801396	0.0925856	0	0.164271	3.88578	0	4.45321	0	0.0307772	0	0.57718	0
hs413	8.61066	4.25104	0	0	0	0	0	0	0	0	0	0	0	0	0	0	0	0	0	0	0	0	0	0	8.83741	0	0	4.22988	4.22988	0	2.27551	4.33913	0	0	0	0	0	4.36452	4.55964	4.33519	4.71407	3.99802	0	4.23508	0	3.43639	0	4.31344	4.68876
hs414	4.50031	4.11862	0	0	0	0	2.17354	0	0	0	0	2.35219	0.595446	0.019144	0	1.43499	0	0	0	0	0	0	0	0	0	0	0	0	0	0	4.18177	0	0	0	1.91823	0	0	0	4.38978	5.04692	6.63632	4.55926	3.82425	5.02641	0	1.67611	0	3.69917	8.08743
hs662	0	0	0	0	0	0	0	0	0	0	0	0	3.25175	0	0	0	0	0	0	0	0	0	0	4.05493	0	0	0	0	0	0	2.86577	0	0	0	0	0	0	4.07727	0	0	3.35617	4.17914	0	0	2.52358	5.10292	0	0	0
hs573	4.06048	4.90658	4.05849	0	0	2.11789	1.83061	0	0	1.96773	0	0	0	0	0	0	4.74569	0	0	1.7882	1.86347	0	1.52084	0	0	0	0	0	5.11407	0	4.20551	4.53018	4.55909	0	5.57025	0	0	9.88643	0	0	0	4.01457	0	4.93181	0	0	0	0	0
hs415	3.12876	0	0	0	0	0	0	0	0	0	0	0	0	0	0	0	0	0	0	0	0	0	0	3.0954	0	0	0	0	0	0	0	4.60906	4.02363	0	5.02503	6.56313	6.90409	0	0	0	0	0	5.40782	0	0	0	0	0	4.0943
hs794	4.5867	0.031232	0	0	0	0	0	0	0	0	0	0	0	0	0	0	0	0	0	0	0	0	0	1.63615	0	0	0	4.71897	4.55284	4.71897	6.77024	4.37469	4.18253	0	7.47154	0	0	0	4.011	0	0	0	0	0	0	0	0	0	7.53662
hs1477	0.0154014	0	0	0	0	0	0	0	0	0	2.26529	1.64271	0	0	0	0	0	0	0	0	0	0	0	4.71021	3.99468	0	0	0	0	0	0	0	0	0	0	0	0	4.58152	9.78567	5.86002	6.5374	4.065	5.48454	0	0	0	0	8.04638	5.91011
mm717	4.0575	5.15611	0	0	3.12324	0	4.19434	3.72692	0	0	2.57433	0.329951	1.58871	0	0	0	5.70014	0	1.18546	0	0.386234	0.380228	3.57531	0.975712	0.603041	0	0	0.0386102	0.0361643	0.0386102	0	0	0.0128425	0	3.59546	0	0	5.79417	2.59238	2.15814	2.46401	0	4.36331	0.791341	0	1.36586	0	1.94726	2.31429
hs2027	0	0.088056	0	0	0.46625	0.235138	0	0.071641	3.99918	0.168739	0	2.4504	0.656111	0	0.0129471	0	0	0	0	0	0.0723116	0	0.168237	0.044752	0.213742	0	0	0	0	0	0	4.75395	0	0	3.99876	0	4.19324	0.0330043	0	0	0	0.0111639	0.589904	2.14543	0	0.031972	0	0.0243116	0.0338608
mm282	0	0	0	0	0	0	0	0	1.04126	0	0	0	2.64889	0	0	0	0	0	0	0	0	0	0	0	0	0	0	0	0	0	0	0	0	0	0.017442	0	0	0	0.0136809	0	0	0	0	0	0	0.0166634	0	0.0121214	0
hs416	10.034	5.55591	0	0	0	0	0	0	0	0	3.62291	0	0	0	4.82391	0	0	4.04096	0	0	0	0	0	0	10.4982	0	6.94932	4.43533	9.01291	4.98716	8.74383	12.7847	4.31224	0	13.711	0	0	0	5.10735	0	0	0	0	10.6538	0	0	0	5.66052	8.55747
hs689	0	4.41005	0	4.14129	0	4.13171	0	0	0	0	0	0	0	0	0	0	0	0	4.76896	4.57512	7.80587	5.05173	0	0	0	0	4.72816	7.95541	9.32841	0	4.52143	4.31707	8.49684	0	4.70518	0	0	19.2844	4.06906	0	0	4.05189	0.0230766	0	0	0	0	0	4.19044
hs890	0	0	0	0	0	0	0	0	4.67335	0	0	0	0	0	4.46597	0	0	0	0	0	0	0	0	4.26841	4.32148	0	0	0	0	0	0.0134745	4.45223	0	0	4.47072	0	0	4.69389	0	0	0	0	5.065	0.0249121	0	4.11362	0	0	0
hs170	5.71444	8.52359	0	0	0	0	4.284	0	4.17522	0	0	4.13668	0	0	0	0	0	0	0	0	0	0	0	4.04144	4.78781	0	0	4.23284	8.29318	0	1.71569	0	1.56176	0	2.54559	0	0.341718	4.37757	0	0	0	0	0	4.40782	0	0	0	0	0
hs640	0	0	0	0	0	0	0	0	0	0	0	0	4.24565	0	4.30629	0	0	0	0	0	0	0	0	4.65561	0	0	0	0	0	0	7.71187	3.8482	0	0	8.19101	0	4.15109	10.3712	0	0	0	0	0	0	0	0	0	4.29614	3.33265
hs606	0	4.09909	0	0	0	0	0	0	3.61805	4.08092	0	8.44852	4.03793	0	0	0	0	0	0	0	4.12321	4.3019	0	4.09691	4.39147	0	0	0	0	0	4.60323	0	4.04472	4.43489	0	0	0	0	0	0	0	0	4.05012	0	0	0	0	0	0
hs420	0	0	0	0	0	0	0	0	4.05948	0	0	0	0	0	0	0	0	0	0	0	0	0	0	0	0	0	0	0	4.44249	0	0	0	0	0	0	0	4.26045	4.35754	0	0	0	0	0	0	0.336649	0	0	0	0
hs421	0	0	0	0	4.67985	0	0	0	5.10313	0	0	0	0	4.05404	0	4.0278	0	0	0	0	0	0	0	0	0	0	0	0	0	0	0.117725	4.07109	0.086988	0.122932	0	0	0	0	0	0	0	0	0	0	0	0.0909812	0	0	0
mm668	0	7.04969	2.8864	0	0.0282535	0	0.0369809	0	4.60206	0	0	0	0	0	0	0	0	0	0	0	0	0	0	4.31445	0	0	0.860479	7.37206	4.06505	3.22606	0	0	0.0724593	0	0.116819	0	3.99425	0	0.0219755	0	0	0	0	0	0.132606	0.0273354	0	0	0
hs1867	1.44749	0	0	0	0	0	0	0	0.0364775	0	0.0230211	4.84462	0	4.04576	0	0	7.31591	0	4.25964	0	0	0	0	5.76135	3.74665	0	0.288778	0	0	0	0.191029	0.772676	0.16178	0	4.07642	0	0	0	4.15181	0	4.25337	0	0	0	4.96658	0	0	4.50307	4.32606
mm55	5.07058	4.26773	4.92812	4.00261	0	0	4.60033	0	4.15802	0	8.14267	4.17759	8.52397	0.452183	0	0	0	4.76165	10.2758	4.02997	4.29671	9.71445	8.9884	4.12378	4.71423	0	0	4.70774	4.70774	4.40671	1.49221	4.45967	0	0	0	0	0	0	4.27277	0	4.15552	0	0.133037	4.13847	8.46672	4.74958	0	4.11895	0
hs553	4.37059	0	0	0	4.17198	0	0	0	4.8461	0	0	0	4.22185	4.07779	4.2993	4.45717	4.60206	0	0	0	0	0	4.18977	8.73706	0	0	4.32331	5.6038	4.74958	5.43652	9.32859	9.53535	5.04431	0	10.1381	4.31785	4.23433	0	0	0	0	0	0	4.23807	4.11634	0	0	4.71444	0
hs1423	17.4942	13.0513	0	0	1.87131	0	0	0	0	0	0	0	2.13363	0	0	4.27003	0	0	4.057	0	0	0	0	0	13.712	4.14099	0	4.57675	14.8527	9.0617	4.08619	7.59984	0	0	0	0	0	0.0658889	4.27491	0	4.11919	0	0.0213908	9.19712	5.14874	0	0	4.29551	0
hs422	8.41021	8.97824	0	0	0	0	0	0	0	0	0	0	0	0	0	0	4.12668	0	0	0	0	0	0	1.12226	4.31515	0	0	0	4.40561	4.52578	4.63586	0	0	4.34104	0.0516161	0	0	8.19873	0	0	0	0.466565	0	5.6073	0	2.03152	0	0	0
hs423	4.43063	5.02595	0	0	7.46728	0	0	0	0	0	0	4.0752	4.32635	0	0	0	0	0	0	0	0	4.07883	4.06753	0	4.32975	0	0	4.72354	9.06572	4.72354	4.88654	5.48543	4.51835	0	4.8107	3.8819	0	0	5.39362	4.74958	12.9892	5.23882	5.16368	0	0	12.9758	4.65758	9.03164	8.50224
hs242	4.3098	0.7646	0	0	5.71289	4.44129	4.30539	0	0	0	0	0	0	4.32655	0	0	0	0	4.10073	4.74715	0	0	4.57025	0	0	4.05012	0	8.44293	4.64207	5.6517	4.15864	0	0	0	4.28269	0	0	4.33939	0	0	4.07883	0	0	4.41472	0	0	0	4.48545	0
hs243	3.2864	0	4.0835	0	4.56225	3.12383	3.25655	0	4.04239	0	0	0	0	1.60388	0	4.46141	0	0	0	3.47589	0	4.10347	0	10.4863	0	0	0	4.11805	4.01818	2.9129	5.32638	4.06482	4.45717	0	8.69433	0	0.0448518	4.87922	4.48368	0	0.0692621	4.00482	4.54212	1.97786	0	0	0	8.45149	4.14813
hs244	0	0	0.104181	0	1.5395	0	0	0	0	0	0	0	4.38984	0	4.11919	4.14997	4.37161	0	0	4.14086	0	0	0	4.6717	5.15773	0	4.08355	0	4.30103	4.15989	8.68674	0.706576	0	0	5.74142	0	0	3.81586	5.60316	0	5.02574	4.53333	0	0	4.23582	0	0	4.2815	5.25074
hs574	0	2.34447	0	0	0	0	0	0	3.60907	0	0	0	0.509588	0	0	4.06753	0	4.92812	0	0	0	0	0	4.19022	4.0846	0	0	0	0	0	0	0	0	0	0	0	0	0	4.26567	0	0	0	0	0	0	0	0	0	4.61979
hs860	4.04818	0	0	0	0	0	0	0	6.32232	0	0	0	0	0	0	0	0	0	0	0	0	0	0	0	0	0	2.69767	4.40894	11.088	0	0	4.19359	0	0	0	0	0	4.37503	4.37675	4.63639	0	3.41346	4.30892	2.23095	0	0	0	4.04576	0
hs953	0.0630834	4.09079	0	0	0	0	0	0	0	0	0	0	0	4.7454	0	4.67823	4.47657	0	0	0	0	0	0	4.6057	0	0	0.228553	0	8.38996	4.13549	8.29603	7.93902	9.06402	0	9.04703	0	4.00568	13.7957	4.31966	4.47366	4.17134	4.31876	0	0	0	0	0	2.57305	0
hs245	10.6305	12.0043	0	0	0.0132149	0	0	0	0	0	0	0	0	0	4.08222	0	0	0	0	0	2.2362	0	4.23433	0	8.90577	0	0	4.28316	13.9733	0	0	4.1891	0	0	0	0	0	0.36156	3.37116	0.164017	2.80045	0.025552	0.17879	9.19998	0	0	0	2.66138	4.0511
hs616	0	0	0	0	0	0	8.03195	0	0	0	0	0	4.29489	0	0	0	0	0	0	0	0	0	0	0	4.26761	0	0	4.18642	0	0	0	4.08566	0	0	0	0	0	0	4.38616	0	0	0	4.97469	0	0	0	4.4828	5.64782	4.31426
hs246	4.05355	8.58306	0	4.04239	0	0	4.33819	0	0	0	0	4.33596	0	0	0	0	0	4.15181	4.25649	0	0	4.2815	4.00922	4.25727	9.66857	0	0	4.05306	0	0	3.25421	4.21968	4.54212	0	4.81253	0	0	4.43177	0	0	0	0	0	0	0	0	0	0.414914	0
hs248	4.45346	0	0	0	0	0	0	0	0	0	0	0	0	2.29273	0	0	0	0	0	0	0	0	0	0	0	0	0	0	0	0	0	3.05431	0	0	0	1.41077	0	0	0.537627	0	0.478377	0.911831	0	0	0	0	0	1.06428	0
hs626	0	0	0	0	4.49909	0	0	0	0	0	0.161653	0	0	0	0	0	0	0	0	0	0	4.63264	0	9.68717	0	0	4.68724	4.40671	4.10513	4.16749	0	0	0	0	0	0	0	0.041091	4.78247	0	4.01214	0	0	4.08831	4.02656	0	0	3.98208	0
hs1245	4.812	3.59271	0	0	0	0	0	0	0	0	0	0	0	0.02528	0	0	0	0	0	0	0	0	0	0	0.123244	0	0	0	4.10417	0	0	4.19249	3.94518	0	0	0	0	0	4.05849	0	0	0	3.82656	4.23242	0.083444	0	0	7.91434	0
mm1324	0.103799	0	0	0	1.15516	0.542979	1.12285	0.56881	0.738604	0	0	0.177246	3.87852	0	0	0	0.225639	0.43258	0	0	0.583142	0	0	2.27262	0.302736	0	0	0	0	0	0.290759	0	0	0	0.335176	0.501576	0.482125	3.03545	0.0147543	0.0163	0.0157428	0	0.0558935	0	0	1.90983	0	0.406528	0.417136
hs2090	0	4.64397	0	0	0	0	0	0	0.0263588	0	0	4.42885	0.0128638	0.0132504	0	0	0	0	0	0	0	0	0	0.0805107	0	0	2.79859	0	0	0	0.125276	0.0132964	0	0	4.9398	0	0.0359976	1.51999	4.19044	0	4.32422	0	0	0	0	0.0521486	0	4.03433	0
mm1328	0	8.22073	0.118513	0	0.185554	0	4.38385	0	3.03603	0	0	3.09303	0.845393	0.0196689	0	0	0.419798	4.41567	2.02644	0	0	0	0	0.0703961	4.00389	0	0	0	0	0	0	4.40469	3.87214	0	8.76806	1.28443	4.10186	7.25884	4.09694	4.19265	4.7145	0	0.47835	0	2.03604	0	0.189153	4.36029	0.225124
hs2080	0.082471	0.207435	1.56113	0	0	0	0	0	0	0	0.0212799	0	0.409155	0.588679	0	0	0	0	0	0	0.0190246	0	0	0.746587	0.867611	0	0.651744	0.091331	0.091331	0	0.0766842	0.0327023	0.0205149	0	0.0691734	0.0466429	0.0362879	3.36639	0	0	0.0292632	0	0	0	0	1.17527	0	0.0221583	0
mm1312	0	0.628014	0	0	0	0	0	0	0	0	0	1.01235	0.0324152	0	0.0201322	0	0	4.11446	0.794725	1.52992	0	0	0	0.328382	4.6885	0	0	5.22816	3.44807	0	0	0.0449096	0	0	3.87344	0	0	0.705399	4.08741	0	4.56067	4.20363	0	0	1.07412	0.701512	0	0.381059	0
hs1858	0.0142295	0.012271	0	0	0.0190437	0	0	0	0.0242144	0	0.0159791	0	0.0146879	0	0	0	1.54387	0	0	2.6329	0	0	0	1.43801	0	0	0.655936	0	0	0	1.05429	0.0627056	0.0450253	0	0.178818	0	0	2.30924	0	0	0	0	0	0.0177442	2.54562	0	0	4.95319	0
hs577	0	0	0	0	4.51145	0	0	0	0	0	0	0	0	0	5.02826	0	0	0	0	4.2993	4.74715	5.03152	0	0	4.6038	0	0	0	0	0	0	0	0	0	4.4045	0	0	4.17457	0	0	0	0	4.11464	0	0	0	0	0	0
hs113	4.04576	4.45967	0	0	0	0	4.97469	0	0	0	3.32964	0	0	0	0	0	0	0	0	0	0	0	0	10.3034	8.37195	0.931779	0	0	0	0	2.02859	0	0	0	0	0.143444	0	4.53442	0	0	0.0610281	0	0	0	0	0	0	4.22841	0
hs866	0	12.8492	0	0	4.17457	0	0	4.00833	0	4.65956	0	0	0	0	0	0	4.36151	0	0	0	4.39794	4.45791	0	0	4.18232	0	4.26375	8.90029	4.55752	4.0048	0	2.4978	0	0	7.43545	0	2.7787	0	4.09882	0	5.00349	5.4934	0	8.24934	0	4.72512	5.78415	5.13371	0
hs855	0	0	0	0	0	4.00833	0	4.02503	0	4.10073	0	0	0	0	4.1027	0	0	4.05502	0	0	0	0	0	4.17474	0	0	0	4.40894	4.03292	0	0	0.950228	0	0	1.91173	0	0	4.42244	0	0	0	0	0	0	0	5.42655	0	0	1.15377
hs1531	15.0034	8.44902	0.0113156	0	0	0	0	0	0	0	0	0	0	0	0	0	4.46344	4.27969	0	0	0.0112151	0	0	0.189471	3.67063	0	3.98648	13.4953	12.7471	8.4003	0.0158383	0	4.19107	0	0.0865435	0	0	1.39831	0.0113535	0.0117202	0	0	0	9.39054	0	8.40533	0.186126	0	0.0112702
hs1082	8.74261	9.15762	0	0	0.309302	0	0	0	0	0	4.93831	4.64558	0	0	4.39903	0	0	0	0	0	0	0	0	3.27898	8.45868	4.34294	0	9.37304	8.79697	4.41117	0	3.77206	0	0	4.39983	0	11.8555	4.46802	0	0	0	0	0	4.17052	4.2426	0	0	0.273083	0.0594555
hs198	4.03574	4.06048	0	0	0	0	0	0	0	0	0	4.13063	0	0	4.00524	0	0	0	0	4.17522	0	0	4.13549	13.4088	0	4.42829	0	4.71897	4.4168	4.71897	3.92857	0	0	0	0	4.767	4.19791	0.446506	4.04411	0	4.5212	4.02919	4.64397	0	0	0	0	0	4.48678
hs234	0	0.908204	0	0	4.06115	0	0	0	0	0	0	0	5.24185	0	0	4.25259	5.02242	0	0	0	0	3.55439	4.62952	4.13668	1.18227	0	4.20628	0	0	0	10.1551	5.53154	5.51713	4.003	9.99712	5.17914	0	9.85484	5.0942	4.49621	4.57675	9.34014	4.34008	0	0	0	0	5.3098	5.86012
hs565	0	0	0	0	8.53459	0	0	0	4.83236	0	0	4.22671	0	0	4.00957	0	4.21896	0	0	0	0	0	0	4.24949	0	0	12.3527	0	0	0	0	0	0	0	4.06094	0	0	8.25962	8.05869	0	0	0	0	0	4.18046	0	0	0	0
hs863	0	0	0	0	0	0	0	0	0	0	0	0	0	0	4.84164	0	0	0	0	0	0	0	0	10.4067	0	0	3.95126	0.146419	0.137125	0.146419	0	0	0	0	0	0	0	8.20438	0	0	0	0	0	0	0	0.363675	0	0	0
hs910	0	4.4318	0	0	0	0	0	0	0	0	0	0	0	0	0	4.37263	5.45469	0	0	0	0	0	0	0	0	0	0	0	0	0	2.89852	2.86175	0	0	0	0	0	4.08867	0.0468105	0	0	0	0	0	0	4.83578	0	0	0.0104099
mm182	0	0	0	0	0	0	0	0	0	0	0	0	0	0	0	0	0	0	0	0	0	0	0	0	0	0	0	0	1.58004	1.57083	0	0	0	0	0	0	0	0	0	0	0	0	0	0	0	0	0	0	0
hs776	4.04915	0	0	0	0	0	0	0	5.15157	0	4.13847	0	4.38091	0	0	0	0	4.40012	0	4.4012	0	0	0	0	8.88827	0	4.50031	0	0	0	4.88467	4.39105	4.19643	0	4.13083	0	4.11014	4.01954	4.04144	0	4.17017	0	0	0	0	0	0	4.49214	4.19379
hs354	0	0	0	0	0	0	4.71591	0	0	0	0	0	0	0	0	0	0	0	0	0	0	0	0	0	0	0	0	0	0	0	4.64782	0	0	0	0	0	4.48681	0	0	0	0	0	3.39235	0	0	0	0	4.01342	0
hs355	4.20971	10.3114	0	0	0	0	0	0	0.0163898	0	0	1.6625	0	0.985762	0	0	4.1394	0	0	0	0	0	0	0.79393	0	0	0	4.61602	0	0	0	0	0	0	0	0	0	7.69854	0.175329	0.212991	0	0.1643	0.195495	0	0	0	0.165302	5.383	0.168513
hs828	4.3019	4.5867	0	0	0	0	0	0	0	0	4.91364	0	4.31354	0	0	0	0	0	0	0	0	4.15614	0	0	0	0	4.07797	0	0	0	12.066	5.27211	4.39763	0	8.79982	4.23552	0	3.74967	4.23657	0	0	0	0	4.11748	0	0	0	0	0
hs812	0	4.00922	0	0	4.39794	0	0	0	0	0	0	4.45593	0	0	0	0	4.0874	0	0	6.85689	0	4.07058	0	0	4.20482	0	0	2.3064	0	3.35744	4.17278	0	2.87412	0	6.90858	3.54399	3.73585	8.97316	0	0	0	4.27572	0	0	0	5.06705	0	0	0
hs1871	0	0	0	0	0	4.19791	4.17914	0	0	0	0	0	0	0	0	0	0	0	0	4.39147	0	3.96713	5.12321	0	0	0	0	0	0	0	0	0	0	0	0	0	3.46877	0	0	0	0	0	0	0	0	0	0	0	0
mm669	9.48319	4.34224	0	0	0	0	0	0	0	0	7.36782	0	4.01592	0	0	0	0	0	0	0	0	0	0	6.49127	4.2233	0	0	8.88162	9.52158	4.24795	4.60906	4.14563	1.0764	3.96668	5.71482	2.1192	2.40912	5.70048	0	0	0	0	0	4.27686	1.78456	0.596122	0	0	4.00092
hs489	4.03668	0	0	0	0	0	0	0	0	0.0604514	0	0	0	0	0	0	0	0	0	0	4.18776	0	0.0102324	0.0651283	0	0	3.11334	0	0	0	4.45975	0.119155	0	0	0	3.65891	0	5.39006	0	0	4.23412	0	0	0.0202778	0	0	0	0	0
hs1129	4.30364	8.40264	4.01579	0	0	0	0.325157	0	4.41117	0	0	4.1296	4.66422	4.80326	0	4.01909	0	4.07314	4.13966	4.33255	0	0	0	4.37468	0.0639048	0	3.31458	0	4.16941	0	8.65246	4.09745	4.04198	4.61083	0	0	0	0	4.37504	0	7.21727	0	0	0	0	0	0	4.5385	0
hs181	4.09151	0	0	0	0	0	0	0	0	0	0	4.25104	0	0	0	0	4.04687	0	0	0	0	0	0	1.37562	4.53748	0	0	0	0	0	0	0.0174864	0.166794	0	0	0	0	5.78962	4.21254	0	0	0	4.1463	0	0	0	4.16178	5.17436	0
mm255	0	1.39564	0	0	0	0	0	0	0	0	0	0	4.64994	4.34008	0	0	0	0.173113	0	0	2.42631	0	0	0	0.0271646	0	0.174979	0	0	0	0	0	0	0	0	0	0	0	0	0	0.0285274	0	2.87465	0	0	0.203372	0	2.52727	0
hs1178	4.80134	12.0218	0	0	3.05826	0	4.09044	0	0	0	0	4.21681	3.99297	0	0	0	0	4.03953	0	0	0	4.45401	0	1.78914	4.32239	0	0	5.80325	5.91688	1.60855	7.47652	1.70659	5.60843	0	8.40409	3.69521	0	5.32606	3.88214	0	3.85134	0.572841	0	4.37366	0	0.107946	0	0	0
hs1097	0	0	0	0	0.0171441	0	0	0	4.07727	0	0	4.07417	0	0	0	0	0	0	3.96801	0	0	0	0	0.547173	0	0	0.507021	0	0	0	0	4.2479	0	0	0	0	0	3.94394	8.18876	0	4.11736	0	0	0	0	4.49688	0	4.33821	0.0144023
hs572	0	0	0	0	2.65479	0	0	0	4.15802	0	0	0	5.14087	4.68403	3.81224	0	0	0	0	4.03198	0	0	0	4.06413	4.48812	0	3.48608	0	0	0	4.94692	0	4.31785	0	7.80874	0	3.27447	4.14748	0	0	0	0	0	0	5.87366	1.55658	0	0	0
hs356	5.74277	4.17967	0	0	0	0	0	0	0	0	0	1.69227	0	4.04971	0	0	4.16368	0	0	0	0	0	0	0	8.28976	0	0	4.71897	8.75856	4.71897	0	0	0	0	0.683082	0	4.32057	0	2.73665	2.43352	0	6.8188	0	5.91867	0	0	2.573	2.41795	2.61758
hs599	4.4828	1.88707	0	5.8962	0	0	4.11425	0	0	0	0	0	4.56737	4.52724	3.98443	0	0	0	0	0	4.3569	4.44432	0	0	1.62573	0	8.86888	0	0	0	4.46218	0	0	4.52871	0	8.22637	4.8656	0	2.99199	0	0	0	0	0	4.85078	0	0	4.19997	0
hs830	4.23154	0	0	0	0	0	4.02166	0	0	4.28735	4.50864	4.44855	0	0	0	0	0	0	0	0	8.73174	8.6324	0	0	0	0	0	0	0	0	0	4.04576	4.44733	0	0	0	0	0	0	0	4.61585	0	0	4.21681	0	0	0	0	0
mm1368	10.1061	6.8965	0	0	0.434414	0	0	0	0	0	0	0.878016	0	0	0	0	0	2.40145	0	0	0	0	0.0399626	1.7575	3.55156	0.327483	0.069053	0	0.0126452	0	0.261419	0	0.265244	0	2.41193	0	0	1.98242	2.5124	0	2.81772	2.47821	0	9.3499	0	0.46928	1.42954	1.63536	2.69939
hs1611	9.04774	18.1477	0	0	2.08889	0	0	0	4.39147	0	0	0	5.97469	0	3.531	0	0	4.83863	0	0	0	0.0155214	0	0	0	0	0	4.56225	4.87943	0	0	4.16028	0	0	6.49945	0	0	3.33457	5.53702	0	0	0.183157	0.0292438	0	0	4.63819	0	5.45011	4.26342
hs1881	0.0136003	4.14703	0.239144	0	0	0	0	0	4.23517	0	0	0	0	0	1.18513	0	0	0	0	0.747117	0	0	0	3.1925	0.0922644	0	0	0	0	0	2.38397	0.0113444	0	0	0.0127329	0	0	1.43741	1.22856	0	1.10624	0	0	0	0.0916447	0	0	0.543612	0
hs1687	4.84268	0.0142969	4.5076	0	2.01426	1.86148	1.67348	0	4.6038	1.8907	0.0410474	0	0.142398	0	5.77966	0	4.40582	0.0956364	0	0	0	4.24322	4.01233	0	4.07841	0	0	4.59222	4.55281	4.59222	4.12874	0	0	4.15357	0.0363627	0.262576	0.0272265	4.99748	0.312427	0.326974	0.157344	8.14278	0	5.22653	0	0	0	8.84618	4.97371
mm670	0.010701	0.163518	0	0	0	0	0.0200661	0	0	0	0	0	1.58532	0	0.0894988	0	0	0	0	4.28316	0	0	0	0.418388	0	0.0114329	0	6.14039	4.06206	0	2.26773	2.83682	1.20954	0	2.89934	4.11748	0	4.86948	0.0809975	0	0.199969	0.0820646	0.077322	0	0.471601	1.70429	0.0845513	4.7809	0.606045
hs632	11.0201	9.59275	0	0	0	0	0	0	0	0	4.1349	0	0	0	0	0	0	0	0	0	0	0	0	0	5.31158	0	0	4.29499	4.64782	4.5157	0	0	0	0	0	0	0	2.87881	2.95055	0	2.99255	0	0	0	0	3.27558	0	2.52562	0
mm1313	4.77564	4.01501	1.37975	0	2.35635	0	0	0	1.55494	0	0.196782	8.53397	2.4535	0.262952	0.202059	0	0	0	4.39233	0	0	0	0.0171246	2.13853	0	0	1.05705	0	4.02051	3.98492	0.135459	0.329191	0.129345	0	0.248198	2.87691	2.56877	3.42616	4.4425	0	2.13302	2.11826	1.84061	4.2945	4.40479	0.662132	2.0127	2.60837	1.91876
mm1391	4.30364	0	0	0	0	0	0	0	0	0	0	0	0.0259485	0.0113668	0	0	0	0	0	0	0	0	0	0.133506	0.0148364	0	0	4.60673	4.27535	3.65633	0	0.531998	0	0	0.37289	0	0	0	9.27711	0.91964	0.0133825	1.01986	0.984311	5.38195	0	0	0.950871	4.08688	0.93339
hs1278	0	9.42947	0.197641	3.9816	0	0	0	0	0	0	3.99552	2.77824	0	0	4.05404	0	0	0	0	4.21042	0	0	0	0	0	0	0	4.08566	4.19928	0	0	0	0	0	0	0	0	0	0	0	0	0	0.0567835	0	0	0	0	0	0
mm671	0.364814	0	0	4.19723	0.120042	0	0	0	0.793468	0.29615	0	0	3.34457	0	0.993813	0	0	0	0	2.57335	0.0498972	0.435059	0.176196	0.011422	0	0	4.07628	0	0	0	4.71795	1.5933	0	0	0	0	0	3.85663	0.0249292	0	0	0	2.845	0	0	0	0	3.34973	0
hs2393	0	0	0	0	0	0	0	0	0	0	0	0.0135613	0	0	0	0	0	0	0	0.53331	0	0	0	0	0	0	0	0	0	0	0	0	0	0	0.0308388	0	0	1.89235	0.0530455	0.0210606	0.0600465	0.0370745	0.0255486	0	0	0.0125485	0.0318517	0.0473431	0.0287574
mm300	0	0	0	0	0	0	0	0	0	0	0	0	0	0	0	3.32722	2.70438	0	0	0	0	0	0	0	0	0	0	0	0	0	0	0	0	0	0	0	0	0	0	0	0	0	3.35643	0	0	0	0	2.46406	0
hs688	4.11691	4.52143	4.24949	4.18575	8.54082	0	4.04866	0	6.02243	0	0	0	8.32585	0	0	0	4.36351	0	0	0.897228	0	4.17328	0	0	0	0	0	0	4.02595	0	4.00375	5.18616	4.18296	0	4.60948	0	0	9.35989	0	0	0	4.29499	4.03198	0	0	0	0	4.08756	0
hs914	0	0	0.312888	0	3.1958	0	0.952596	0	0	0	0	0	2.67791	0	3.59192	0	0	8.90777	0	0.0481996	0	1.46311	0.0369466	14.0395	0	0.860093	4.09528	4.70997	4.70997	4.40894	4.65817	4.39313	4.64129	0.0241023	0	0	0	0.0181397	0	0	0	3.97504	0	5.40012	0	0.0220488	0	4.41567	0
hs1205	0	8.84862	0	0	0.232893	0	0	0	0	0	0	0	9.50958	4.04335	0	0	0	0	0	0	0	4.03619	0	0	0	0	0	0	0	0	0	4.15739	0	0	0	0	0	0	0	0	0	0	0	0	0	0	0	0	0
mm271	0	0.300216	0	0	2.14813	0	0	0	0	0	0	0	0	0	0	0	0.0895582	0	0	0	0	0	0	0	0	0	0	0	0	0	0	0.406312	0	0	0	0.0157505	0	0	0	0	0	0	0	0	0	0	0	0	0
hs480	0	0.291543	0	0	4.71967	5.87358	5.15989	5.49018	0	4.93005	0	0	0	0	0	0	0	0	0	5.39794	6.30578	0	5.14327	0	0.333909	0	0	0.0315106	0.0154022	0.0201612	0.653625	5.56234	0.954376	0	9.81183	0	0	0	0	0	0.117334	0	0	0.177046	0	0	0	0.0547158	0
hs2050	0.115834	0	0.0135215	0	0	0	0	0	5.34807	0	0	3.98147	0.0323508	0	0	0.167385	0.154375	0	0	0	0	0	0	0	0	0	0	0.0736951	0.0736951	0	0	2.98184	0	0	4.72267	0	0	4.57927	7.87386	0	3.24337	0	0	0.0160838	0	0	0	18.2931	4.45967
mm161	0	0	0	0	0	0	1.94094	0	0	0	0	0	0	0	0	0	0	0	0	0	0	0	0	0	0	0	0	0	0	0	0	0	0	0	0	0	0	3.85507	0.411762	0	0	2.00623	0	0	0	4.12793	0	0.366312	0
hs2225	4.86705	3.45193	0.588911	0	0	4.47756	8.40788	0	0	4.22185	0	0	0.0239218	0	0	0	0	0	0	0.0996406	0	2.94827	0.0719108	2.45703	0.117289	0	0.0531117	0	4.21678	4.10153	2.55081	6.6449	3.98043	0.753506	6.61115	0	0	8.30253	5.65121	3.58517	4.03018	0	7.91321	4.28256	0	0	0	4.38013	10.0529
mm346	4.4168	0.0113794	0	0	0	0	3.04986	0	3.93069	0	0	0	0.0568111	0	4.35806	0	0	0	0	0	0	0	0	4.74085	0.0213676	0	0	4.96658	11.3879	5.70756	4.06527	0.17055	0	0	0.159589	0	0	3.85774	0	0	0	0	0	7.08654	0	0	0	0.0253644	0.722583
mm59	0	1.16309	0	0	0.0128401	0.154807	0.195017	0.182261	1.91081	0.164949	0	0	0.0334285	1.23563	0.052124	0	1.61139	0	0	0.189483	0	0	0.21483	0.0481847	0	0	0	0	0	0.857095	0	0	0	0	0	0	0	0	1.35901	0	1.35983	0	0.057202	0	0	0	0.0532593	1.23183	0
hs1630	4.61261	8.92028	0	0	0	4.92199	4.10899	8.4478	0	8.91537	0	2.64551	8.21273	0	0	0	0	0	4.0626	0	4.76428	4.00614	0	4.06048	2.68052	0	4.34486	0	0	0	0	4.91918	3.60918	0	9.09264	0	0	4.1098	0.0279547	0.0146201	0.0153582	0.0153567	3.76735	4.69465	0	0.409162	0	3.73205	0.0128213
mm1377	0.0118206	1.43592	0	0	0	0	0	0	0.0101969	0	0	0.278962	0.923968	0.681268	0	0.100288	0.0866627	0	0	0	2.86661	0	0	0.850453	0	0.383878	1.97951	0	0	0	2.77947	0.893554	0	0	3.16972	0.0285556	0	0.0350742	3.93291	0.0305547	0.0454643	0.0610822	3.80498	0.0137652	0.722618	0	0	3.51538	0.246913
hs659	4.22695	9.87699	0	0	4.1036	0	0	0	0	4.37161	3.91562	0	0	4.42376	0	8.40703	4.46709	0	0	0	0	0	4.32018	0	0	0	0	0	4.41742	0	2.68044	4.00759	4.30701	0	7.15056	0	0	6.90749	0	0	0	0	0.15647	0	0	0	0	0.9313	0
hs1042	8.8221	17.0735	0	0	0	0	0	0	2.384	0	0	0	0	0	0	0	0	0	0	0	0	0	0	0	13.7092	0	5.02136	4.4169	0	4.07722	4.00085	0	4.0101	0	5.14569	0	0	0	0.016308	0	0.0108249	0.0144206	0.0116461	4.31158	0	0	0.0135479	0.136794	0.0126356
hs1237	0	0	0	0	0	0	0	0	2.64916	0.218042	0	0.0132957	0	0	0	0	0	0	0	0	0	4.22988	0	0	0	0	0.0879907	0	4.01323	0	0	3.28693	0	0	0	0	0	9.72377	0	0	0	0	0	0	0	0	0	0	4.60039
hs992	4.31515	0	0	0	0	0	4.33068	0	0	0	0	0	0	0	4.02136	0	4.5157	0	0	0	0	0	0	3.99958	0	0	4.15058	4.28067	0	4.16115	4.04915	0	4.10735	0	1.57428	0	0	0	5.88039	4.35348	4.99024	0	0	0	0	4.44444	0	8.96206	0
mm645	0	0	0	0	0	0	0	0	0	0	0	3.66154	2.82439	0	0	0	0	3.22776	0	0	0	0	0	0	0	0	0	0	0	0	0	0	0	0	0	0	0	0	0.0956602	0	0	0	0	0	0	0	0	0	0
hs1781	4.72125	5.08831	0	0	4.16622	4.4529	4.42481	0	0	0	0	4.14196	0.24203	0	0	0	0	0	0	0	4.62709	0	5.15802	0.0519814	0	0	0.0317626	3.37818	9.41591	7.42319	0	0	0	0	0	0	0.0118447	0.0262052	0	0	0.0524219	0	0	4.56384	0.227073	0.298592	0	0	0
hs1086	0	4.45346	0	0	0	0	4.15366	0	0	0	0	5.00568	4.55596	0	0	0	0	0	4.13018	0	4.1986	0	0	0	0	0	0	0	0	0	4.14267	4.24413	4.17653	0	0	0	0	4.44977	0	0	0	0	0	0	0	0	0	0.460806	0
hs1234	4.05159	4.21753	0	0	0	0	0	0	0	0	0	0	0	0	0	0	0.3877	0	0	0	4.06349	0	0	0	4.80688	0	0	0	0	0	0	0	0	0	0	0	0	0.156329	0	0	0	0	0	0	0	0	0	0	0
hs1590	0	0	0	0	0	0	0	0	4.00568	0	0	7.17574	4.12484	4.0352	0	0	0	0	0	0	0	0	4.03953	0	0	0	0	4.02091	4.00524	4.00524	0	0	0	0	4.52973	0.205369	0.295158	0.160998	0	0	0	0.0145017	0	0	0	0	0	0	5.32725
hs1591	4.15428	4.90966	0	0	0	0	0	0	0	0	0	0	0	1.12412	0	3.7448	0.213852	0	0	0	0	0	0	0	0.0455093	0	4.52189	0	4.4698	0	0	0	0	0	0	0	0	3.70156	4.05601	0	8.27533	0	0	0	0	0	0	0.0170714	0
mm915	3.83977	3.63873	0	0	0	0	0	0	0	0	0	0	0	0	0	0	0	0	0	0	0	0	0	0	0	0	0	0	0	0	0	0	0	0	0.107366	0	0	1.48855	0.321364	0	0.0546675	0	0	0	0	4.81656	0	0.195404	0.06466
hs1592	9.06915	10.4303	0	0	0	0	0	0	0	0	0	0.432895	0.0456042	0.240535	0	0	0	0	0	0	0	0	0	2.23694	0.0129797	0	0	4.02091	8.2192	4.00524	0	0	0	0	4.33595	0	0	0.0111809	0.0555991	0	0	0	0	4.32975	0	0	0	0.255176	0.0694036
hs1101	0	4.68613	0	0	0	0	4.06655	0	0	0	4.07624	0.0513975	4.56434	0	0	0	4.22475	4.27327	0	0	0	0	0	0	0	0	0	4.84771	4.56225	4.02919	0	0	0	0	0	0	0	0.0136141	7.83869	0	4.02621	3.32309	3.02505	5.16749	0.13312	0	3.25676	8.92869	7.13482
hs996	13.8584	5.27984	0	0	2.73395	4.14288	4.34104	4.28459	0.684932	4.37258	4.22548	4.36957	0	0	0	4.17198	0	0	0	0	4.16489	0	0	0	4.8962	0	0	4.24795	4.24795	0	0	0	0	0	0	0	0	0	0	0	0	0	0	0	0	2.98491	0	0	0
mm923	0	8.72798	0	0	0	0	0	0	0	0	0	3.92686	0	3.3073	0	0	0	0.0516482	0	0	0.0290792	0	3.96592	0	0	0	0.0335307	0	0	0	0	0	0	0	4.6925	0	0	0.0530693	0	0	8.34147	0	0	0	0	0.747338	0	0	0
hs1593	5.92812	9.48113	0	0	0.0417411	0	0	0	0	0	0	0	0.0676982	0	0	0	4.14691	0	0	3.28254	0	0.0229645	0	4.38052	4.39382	0	0.13437	4.87943	8.65958	4.30364	0	0.147118	0	0	0.212379	0	0	0.0541475	0	0	4.42251	4.1798	0	0	0	0	0	0.037251	0.536547
hs2373	0	0.165982	0	0	3.43155	0	0	0	0	0	0.159091	0	0	0	0	0.0199901	0.0311208	0	4.00465	0	0	0	0	0	0	0	0	0	0	0	0	3.54902	0	0	3.1654	0	0	1.3944	0	0	0	0	0	0	2.16987	3.12917	0	0	0
hs2380	0	0.0470033	0.408241	0	0.100218	0	0	0	0	0	0	0	0.0395662	0	0	0	0	0	0	0.0381025	0	0	0	6.34403	0	0	0.0178326	0	0	0	2.91553	3.21563	0	0	0	0	0	1.26451	0	0	0	0	0	0	0	0	0	0	0
mm1346	3.95098	0.249394	0	0	0	0	0	0	1.34935	0	0	1.91045	1.30705	0	0.572211	0.0114197	0	0	0	0	0	0	0	0.287689	0	0	0	3.16526	5.34813	2.49218	0.150835	0.112193	0.157411	0	0.253997	0.325214	0.315459	0.0829964	0.251563	0	0.233674	0.725495	0.59658	5.65304	0	0.0334326	0.885203	0.215882	0.239113
mm343	0.0253061	0.0174946	0	0	0	0	0	0	0	0	0	0.13826	0	0	0.0209649	0	0	0.0184297	0	0	0	0	0	0	0	0	0	0	0	0	0	0	0	0	0.448978	0	0	0	0.0899417	0	0.0174604	0	0.0797652	0	0	0	0	0	0.152126
mm673	0	0.178114	0	0	0.467991	0	1.98437	0	1.06774	0	0	0.0877311	0.143865	0.0491615	0	0	0.295907	1.84199	0	0	0.22539	0.261221	0	1.07249	0	0	0.0509796	3.34049	0	0	0.727635	2.44217	0.732274	0	0	0.160182	0.142939	0	0	0	0	0	0	0	0	1.4034	0	0	0
hs2045	5.15263	2.60877	0	0	1.79397	0	0	0.0297129	0	0.0298175	0	0	0.261856	0	0.105696	0	0	0	0	0	0.0338377	0	0	0	0	0	0	4.08464	4.19823	0	0.0408976	0	2.26491	0	0.0407433	0	0	0.066603	0	0	0	0	0	0.952489	0	0.0223314	0	0	0
mm368	0	1.15026	0	0	0	0	0	0	3.71979	0	0	0	0	0	0	3.9706	0	0	0	0	0	0	0	0	0	0	0	0	0	0	0.525211	0.119419	0.690722	0.594711	0.593579	0.456766	0.0264855	2.01768	2.3315	0	0	0	0	0	0	0	0	0	0.230247
mm22	0	0.914929	0	0.479817	0.939517	0	0.717186	0	0	0	0	0.0312567	2.07058	0	0	0.233488	0.231127	0	0	0.817144	0	0	0	2.76962	0	1.97931	0	0	0	0	3.80104	3.4662	0.0170267	0	0.342639	0	1.8679	0.0481803	1.9146	0	0	0	4.81698	0	0.663901	3.53491	0	0	0
hs1860	0	4.57806	0	0	0	0	0	0	0	0	0	0	0.015345	0	0	3.96648	0	0	0	0.151784	0	0	0.11137	0.362527	2.81704	0	0	0.13741	4.58809	0	0.0109394	0.0106717	0	0	0.0635555	0	0	4.31005	0	0	0.0177652	2.60827	0	0.11068	0	2.54762	0	3.06868	0.185821
mm1375	0	0.737678	0	0	1.06594	0	0	0	0	0	0	0	0.817014	0.171094	0	0	0	3.49237	0	0.0283155	0	0	4.95445	0.0789375	9.06254	0	0	0	0	0	0.0577556	0.542052	0.0519418	0	1.26413	0	0	0	9.22077	4.11497	8.10296	0.142379	0.114559	0	0.151726	0.0303719	0.124891	4.4129	4.16491
hs911	0	0	0	0	0	0	0	0	0	0	0	0	0	0	0	4.11703	0	0	0	0	0	0	0	0.537585	0	0	4.12901	0	0	0	2.58409	0	2.05628	2.39586	0	0	4.14587	4.38828	0	0	0	0	4.13668	0	0	7.34277	0	0	0
hs610	0	4.27652	0	0	0	0	4.0986	0	0	0	0	0	4.83438	0	0	7.39977	8.35176	0	0	0	0	0	0	4.34849	0	0	0	0	0	0	0	4.32028	0	0	4.35714	0	1.16094	4.50724	0	0	0	0	0	0	0	0	0	0	0
mm1402	0	0.173194	0	0	0.0958888	0	3.36269	0	0	0	0	0	0.0813038	0	0.189399	2.96406	0	0.86554	0	0	0	0	0	0	0.315763	0	0	0	0	0	0.325734	0.446333	0.253574	0	0.295727	0.245164	0	4.07177	0.0554562	0	0.0108338	0.0108916	0.0106282	0	0.0334224	0	0.0115105	0.183896	0.0315558
hs1492	0	3.93961	0	0	0	0	0	0	4.91033	0	4.60657	0	0	0	0.338811	0	0	0	0	0	0	0	0	0	0	0	0	0	0	0	4.40831	0	0	0	0	0	0.0737656	4.87676	0.775765	0	0.747762	0.393998	0.392009	0	0.851447	0	0.348494	0.22028	0.336712
hs1448	5.03905	6.12366	0	0	0	0	0	0	0.0116719	0	0	0	0	0	0	0	4.12009	0	0	0	0	0.0187527	0	0.0265362	0	0	3.12839	4.23284	8.36952	0	0	0	0	0	4.07202	0	0	0	0	0	0	0	0	4.54975	0	0.0138945	0	0	0
mm286	0	0.879159	0	0	0	0	0.0333056	0	0	0	0	0	0	0.0144117	0	0.0172392	0.02282	0	0	0	0	0	0	0	0	0	0	0	0	0	0	0	0	0	0	0	0	0.0214978	0	0	0	0	0	0	0	0.567687	0	0.0432606	0
mm75	4.21754	0	0.0941802	0	0.0520787	0.261816	0.241943	0	0.029229	0.181927	0	0	0	0	0	0	0	0	0.0961024	0.240458	0	0	0.255348	0	0.141963	0	0	0	0	0	0.0397254	0	0	0	0.0169258	0	0	0	0	0	0	0	0	0.0235545	0	0.0675774	0	0	0.0172861
hs1934	0.0252251	0.227719	0.0809454	0	0	0	0	0	0	0.0154977	0.033118	0.0136391	0.278135	0	0	0.0913166	0.0804322	0	0.237857	0.40166	0	0.357474	0.093964	1.93148	0.470194	0	0.230477	0	0	0	0.0117477	0	0.0107115	0	0	0	0	0.561666	0	0	5.20381	0	0	0.06282	0.744576	0.0177255	0.0243509	0	0.0110264
mm92	0.514072	0	0	0	0.346336	0	0	0	0.737182	0	0	0	1.27074	0	0	0	0	0	0	0	0	1.53697	0	3.24391	0.0314517	0	0	1.21479	0	1.22899	0	0	0	0	0.563785	0	0	0.663207	3.87761	0	3.20158	3.66978	3.15025	0.576177	0	0.167004	3.3028	3.2902	3.30472
hs1971	0	0.954303	0	0	0	0	0	0	0.0154932	0	0	0.226932	0	0.0129322	0	0	0.0144941	0	0	0	0	0	0	0	0	0	0.0149737	0	0.0193875	0	0.0137704	0.0118232	0.0142153	0	0	0	0	0.0635645	0	0	0	0	0	0	0	0	0	0.0559138	3.82792
mm38	2.93466	1.58179	0.0145677	0	0.0229075	0	0	0	0	0	0	0	1.61695	0.196846	0	2.63816	0	0	0.0156691	0	0	0.474032	0.026048	3.32907	1.8317	0	0	2.45107	0	3.47527	0	0.082069	0	0	0.0190389	0	0.0117359	0.427715	0.0216544	0	0	0	0.17885	4.34858	0.0121329	0.175745	0	0.0221463	0
hs891	4.69899	4.10386	0	0	1.67526	0	0	0	0	0	0	0	4.53462	0	0	3.26364	3.32211	4.0511	0	0	0	0	0	4.09356	4.92255	0	1.37533	4.4168	5.97062	4.24109	0	1.51803	4.33819	0	4.51375	0.0382617	0	8.96299	1.76834	0.980078	6.06754	0.635159	1.38421	4.32999	0	5.06507	0	0.704676	0
hs1424	4.15672	4.34199	0	0	3.10645	0	0	0	4.79588	0	0	4.77728	0	0	0	0.068064	0.282038	0	0	0	0	0	0	0.918625	4.52724	0	4.32698	9.24236	5.98111	4.70774	2.73918	2.95434	0	0	0	0	0	9.31586	5.50169	0	4.20219	4.56703	4.52143	0	0	0	5.04721	5.24642	4.70333
hs1318	4.02595	5.87615	0	0	0	0	0.0514027	0	5.50307	0	4.37161	4.07485	0	0	0	0.100344	5.3052	3.81462	4.16304	0	0	0	0	0	1.48295	0	0	4.65758	4.09474	4.13549	0.627596	0	0	0	0	0	0	13.5195	0	0	0	0	0	8.46848	0	0	0	4.30843	0
hs774	0	4.7167	0	0	0	0	0	0	0	4.13727	0	0	0	0	0	0	0	0	0	0	0	0	4.03621	4.05856	0	0	0	0	0	0	0	7.49562	0	0	2.59832	4.72816	4.33161	8.41047	0	0	0	0	0	4.06905	4.0734	3.81367	0	0	0
hs1681	4.64397	4.08547	0	0	0	4.39147	4.21968	0	4.44461	4.2636	0	0.667649	0	1.98033	0	0	5.02045	0	0	4.33255	0	0	4.77557	1.03695	0.0170804	0	4.02919	4.40894	4.95078	5.55596	4.45228	4.13042	5.21003	0	0.129383	0	0	6.3671	0	0	0	1.94378	4.48812	4.61083	0	0	0	0	0
hs742	4.37779	0	0	0	4.30627	0	0	0	8.33301	0	1.36488	4.19791	0	1.87548	0	0	8.40008	0	0	0	0	0	0	14.2665	8.87855	0	4.06736	0	0	0	9.60621	4.55982	4.70048	0	14.2576	4.25824	4.05091	6.17914	1.91898	0	0	0	0	0	0	0	0	0.895595	0
hs1422	0	0	0	0	3.54024	0	4.25594	0	0	0	4.01189	4.00216	0	0	0	0	4.01323	0	0	0	0	0	0	0	0	0	0	0	5.36452	0	0	3.06378	0	0	7.53114	0	0	5.11149	4.89055	0	4.4168	0	0	0	0	0	0	7.44206	0
hs801	8.18526	8.24249	0	0	9.25409	0	8.73423	0	4.41963	0	4.32331	7.78783	0	4.52724	0	0	4.77313	0	0	0	0	0	0	4.04387	0	0	0	0	4.0289	0	4.18177	8.16474	0	0	4.17522	0	0.0201976	0	0	0	0	0	0	0	4.36351	0	0	0	0
hs1305	0	0	0	0	0	0	0	0	0	0	0.137185	0	0.0228975	0	0	0	0	0	0	0	0	0	0	4.56984	0	0	0	0	0	0	7.3869	0	0	0	0	0	0	3.85531	4.43078	0	4.3097	0	4.12303	0	0	0	0	0	0
hs1239	8.2744	3.94413	0	0	0	3.99475	0	0	0	0	0	0	0	0	4.14989	0	0	0	0	0	0	0	0	0	0	0	2.09213	3.77411	3.77411	0	4.57941	0	1.084	4.72348	0	0	4.49656	0	0.0205168	0	0	0	4.17807	3.42084	0	4.27984	0	0.0215164	0
hs223	0	0	4.52288	0	0	0	0	0	0	0	4.30892	0	0	0	0	0	0	0	0	0	0	0	0	0	8.38778	0	0	4.05306	4.07883	4.19607	3.10252	3.88115	0	0	4.20773	0	0	4.12552	0	0	0	0	0	0	0	0	0	3.26442	0
hs772	0	0	0	0	0	0.0192043	0	0	0	0	0	4.41435	0	0	0	0	0	0	0	0	0	0	0	4.1986	0	0	0	4.05306	4.05306	0	0	0.69056	0	0	0	4.32944	0	4.48413	0	0	0	0	0	0	2.16927	0	0	0.0729444	3.76508
hs838	0	0	0	0	4.1614	0	0	0	0	0	0.155249	0	4.07624	4.05061	0	0	0	0	0	0	0.0229233	0	0	8.59925	0	0	0	0	0	0	0	0	0	0	0	0	0	5.17057	5.1986	0	9.06461	4.62525	8.45263	0	0	0	4.16052	9.47387	0
hs303	0	0	0	0	0	0	0	0	0	0	4.16494	0	0	12.9446	0	0	4.10403	0	8.20716	0	0	0	0	0	9.86744	0	0	0	0	0	0	0	0	0	0	0	0	0	4.16304	0	0	4.04048	4.03716	0	0	0	0	4.18442	0
mm86	0.1845	0	0	0	0	0	0	0	0	0	0	3.25084	0.0130137	0	0	2.53912	2.28594	0	0	0	0	0	0	0	0	0	0	0	0	1.0856	0	0	0	0	0	0	0	0.915313	0	0	0	0	0	0.205709	0	0	0	0	0
hs1712	0	0	0	0	1.61278	0	0.215262	0	4.09313	0	0	0	0	0	0	0.121332	0	3.6092	0	0	0	4.08884	0	7.31925	0.0683521	0	2.9504	0.0485053	0.0417875	0.0152005	0.01414	0	0.0111244	0	4.62391	0	0	4.46078	0.213502	0	0.205823	0.0916573	3.99214	0.223652	0	2.37538	0	0.247783	3.98765
hs2119	0.560076	0.581877	0	0.724973	0	0.0125323	0.101416	0.0129184	0	0.0170823	0.0236434	0.280084	1.46494	0.110895	0	0	0	0	0.813673	0.121314	0.0114311	0.283004	0.0951396	0.0120882	0.154746	0	0.816738	0.865919	0.806658	1.03603	0.118657	0.0935596	0	0	0.284098	0	0	0.308519	3.74876	3.56422	3.53167	3.5408	1.76103	0	0.810028	0.219614	0	3.51876	3.61179
hs2118	2.80819	0.0558438	0.789023	0	1.68787	0.404766	1.65594	0	0	0.110757	0	0.0204218	3.89738	0	0.0439849	0.0275928	0.0240251	0	0	0.433255	0	0	0.424886	0.482821	0	0.220918	1.6581	3.29615	0	0	1.36575	0.703322	1.75062	0	1.74387	1.85892	0.095575	2.51168	1.66224	1.76428	1.94056	0.214369	1.90684	0	1.34149	1.11617	0.292012	1.56616	1.82147
hs2117	0	2.9393	0.440494	0	0.038651	0	0	0	0	0	0	0.943268	0	0.020856	0	0	0.531217	0	0	0	0	0	0	0.0109457	0.0312595	0	0.104276	0	0.0242648	0	0.0324913	0.0342038	0.024345	0	0.151993	0	1.13987	0.0957512	0	1.98542	2.20406	0	0	0	4.64621	0.0252747	0	4.90663	0.105817
hs477	0	4.01179	0	0	0	4.20925	4.22727	0	0	5.17098	0	0	0	0	0	0	0	4.0463	0	0	4.1643	4.43063	4.7171	8.06071	0	0	4.09963	0	0	0	7.65982	7.0501	6.92632	5.23504	0	5.2527	0	0	5.34775	4.20691	10.2618	5.27654	4.35754	0	0	0	0	4.39577	8.19965
hs1433	4.20971	5.36558	4.21308	0	8.52835	0	4.91257	0	8.89116	0	6.7795	0	2.33787	4.55964	0	6.16128	4.05355	0	0	0	0.207716	4.29843	0	4.57354	4.84295	4.3439	4.54212	0	4.03292	0	8.30853	4.33904	0	4.15927	3.35009	0.692833	4.51202	8.57324	3.88908	0	3.77279	4.01457	4.06399	4.11126	4.29757	0	4.42184	4.42314	4.23071
hs258	0	3.38468	4.34272	0	0	0	0	0	4.24167	0	0	4.67985	0	4.00174	0	0	4.29043	0	0	0	0	0	0	4.06399	0	0	0	0	0	0	0	4.03105	4.46092	0	6.27088	0	0	0	0	0	4.42102	0	0	0	0	0	0	0	0
hs655	4.32975	0	0	0	0	0	0	0	0	0	8.29236	2.32549	0	0	0	0	0	0	0	0	0	0	4.10752	0	0	0	0	0	2.68512	4.27654	9.72676	7.31966	5.05695	0	5.426	4.03184	0	0	4.4045	0	4.62893	0	0	4.40121	0	0	0	8.86317	4.08145
hs192	0	0	0.0249901	0	0	0	0	0	4.27737	0	4.61439	0	0	4.21344	0	0	0	1.85151	0	0	0	0	0	0	3.03019	0	4.16749	0	0	0	0	1.89584	0	0	0.590266	1.16887	4.36251	9.04911	4.36754	0	8.16498	0	8.79926	0	0	5.55752	4.06672	5.67572	9.15092
hs1332	3.40935	0.293261	0	0	8.06463	4.10513	4.32514	4.6038	0	4.67366	0.0108444	4.21681	0	0	0	4.24565	0	0	0	8.66509	0	4.18776	4.27594	4.03292	0	0	0	0	0	0	0	4.98572	0	0	5.18682	4.10984	4.47718	8.48068	0	0	0	0	4.31695	0	0	4.37963	0	4.56787	0
mm639	0	4.66738	0	0	0	0.0195859	0	0	0.0389193	0	5.13554	0	6.52503	0.0450489	0	0	0	0	0	0.023022	1.08643	1.12186	0	7.38569	0	0	0	0	0	0	1.03374	0	4.14778	0	4.13662	0	0	4.35075	3.56917	0	0	0	0	0	0	0	0	4.08444	0
mm640	4.54538	4.71362	0	0	0	0	0	0	0	0	7.78313	0	5.0583	0.845145	0	0	0	0	0.0190015	0	0	0	0	3.88135	0	0	4.43229	6.70721	1.07632	0.0222245	10.1192	6.01184	9.73586	0.909168	10.066	0	0	4.22841	0	0	0	0.376214	0	4.11605	0	0	0	4.10041	2.80434
hs86	0	0	0	0	0.0130459	0	0.0846787	0	0	0	0	0.146306	0	0	0	0	0	0	0	0	0	0	0	0	0	0	0	0.0222918	0	0	0	0	0	0	0.0663572	0	0	0.0216801	0	0	0	0	0	0	2.20885	0	0	0.126328	1.22205
hs1582	0	0	0	0	4.66569	0	0.761685	0	0	0	0.0280544	0	9.26374	0.0645082	4.06745	0	0	0	0	0	0	0	0	0	0	0	0.0326851	0	0	0	0	0	0	0	4.1396	0	0	0.787375	0.421829	0	0	4.97881	0.0281539	0	0	1.45947	0	0.401157	0
hs1525	4.03044	0.867627	0	3.97238	3.59802	0.258811	0.0344993	0	1.34332	0	0	0	0.402959	0	0	4.1831	0.0100554	4.28077	0	0.0390414	0	0.540602	0.697278	4.45703	7.29188	0	0	5.54061	4.57675	4.74232	1.14358	4.11831	0	0	5.39649	0	0.0346333	8.88172	10.5252	3.45827	4.28067	7.88972	5.24101	2.175	5.43848	4.10309	0	10.9589	0
hs1389	4.12668	4.75154	0	0.340281	4.28145	0	1.55595	0	0	3.3368	0	0	0	0.147104	0	0	1.33938	0	0	0	0	0	0	0	0	0	1.8676	0	4.0575	0	7.86928	0	0	3.46241	5.51398	0	0	0	4.47501	0	0.0132862	1.3382	0	1.53525	0	0	0	1.14332	0
hs2417	0.0186585	0	0	0	0	0	0	0	0	0	0	0	0	0	0	0	0	0.117539	0	0	0	0	0	0	0	0	0	0.0118022	0	0	0	0.0775288	0	0	0.715003	0.488444	0.44765	0	0	0	0	0	0.293944	0	0	0	0	0.1809	0.0151002
hs2412	0	0.172551	0	0	0	0	0.186028	0	0.101066	0	0	0.0233158	0	0.754505	0	0	0	0	0	0	0	0	0	2.8235	0	0	0.181787	0	0	0	0	4.24295	0	0	0	0	0	0.732545	0	0	0	0	0	0	0	0	0	0	0
hs1953	2.99535	6.72959	0	0	0	0	3.04882	0	0	0	0	0.0301817	0	3.72537	0	2.17476	1.66804	0	0	0	0	0	0	2.45372	0.0833046	0	2.72639	0	0	0	0	0	0	0	0	0	0	0	4.14284	0	4.18115	0	0	2.4545	0	0	4.34676	6.3989	4.36597
mm472	0	4.09689	0	0	0	3.33323	3.41381	3.07923	0	0	6.41165	0	0	0	0	0	0	0	2.67875	3.66759	0	0	2.81553	0	6.93506	0	0	4.75203	4.451	4.75203	0	0	3.9289	0	0.635507	4.21062	5.02845	3.01839	3.82863	0	0	0	0	0	2.77125	2.34805	4.08128	4.67364	0
mm1388	0	0.696088	0	0	0	0	0	0	0.298432	0	0	0.959246	1.1827	0	0	0	0	0	0	0	0.0453132	0.0508807	0.0382574	0	0	0	0	0.0443294	0.0431565	0	0.385858	0.0229915	0.349028	0	0.487972	0	0.0653311	0.0124047	0.63885	0	0.146417	0.845923	0	0	1.74697	0.994585	0	0.0436452	0.0837983
mm366	0	0.136074	0	0	0	0	0	0	0	0	0	0	2.93559	0	0	0	0	0	0	0	0	0	0	0	0	0	0	0	0	0	0.076218	0.0181821	0	0	0	0	0	1.75278	1.72779	0	0.0415418	0	0	0	0	1.20164	0	0.0386368	0
hs1333	4.7986	0.0659797	0	0	0	0	0	0	4.03251	0	0	0	4.69465	4.44793	0	0	0	3.78986	0	0	0	0	0	0	1.53561	0	0	4.22988	4.22988	0	3.26356	0	0	0	4.00016	0	0	3.99671	0.0276293	0	0.0370719	0	0	0.0208595	2.08272	0	0	6.38348	2.2881
hs1330	0	3.64649	0	4.38084	12.562	0	0.859378	0	0	4.00987	0	5.5327	0	0	0	2.1937	0.427443	0	0	0	4.08695	4.4034	4.34679	15.6082	0	4.56543	4.74394	0	4.3758	0	4.6073	0	4.03716	0	4.09044	0	0	5.55758	0.459362	0	0.0493021	0.019468	0	0	0	4.03984	0	4.00788	4.21042
mm163	0	0.0706578	0	0	1.81947	0	0	0	0.122862	0	0	2.04643	0	0	0.0425129	0	0	0	0.011751	0	0	0	0	0.0159099	2.34826	0	0	0	0	0	0	0	0	0	0	0	0	1.54181	0.155596	0.14342	0.156557	0	0.198916	0	0	0	0	0	3.961
mm1365	0	0.0713692	0	0.982824	0.20164	0	0.22951	0	0	0	2.51721	2.15966	2.76147	0	0.0211456	0	0.706486	0.848569	1.01473	4.02699	4.46098	0	0	0	0	0	0	0.122897	0	0	0	0	0	0	0	0	0.128017	0	2.92403	0	0	0	0	0	0.87975	0	0	0	0
hs2232	0	0.260532	0	0	0.0143953	0	0	0	3.45076	0	0	0	0.033607	0	0	0.60955	0	0	0	0	0	0	0	5.43616	0.210852	0	0	0.0171629	0.226491	0.0172499	0	0.220334	0	0	0	0	0	2.65131	0.178818	0	0.0230899	0	0.167954	0.0117349	0	0	0	0.138526	0.0117813
hs638	0	0	0	0	0	0	0	0	0	0	0	0	0	4.22794	4.0575	0.637604	0.637604	0	0	0	0	0	0	0	0	0	0	4.22768	5.27003	4.02182	4.49757	4.29777	4.28126	0	4.07254	0	0	3.11834	0	0	0	4.84164	0	0	0	0	4.19791	8.29921	0
hs1409	0	0	0	0	7.76823	0	0	0	4.04738	0	0	3.17908	0	4.52724	0	3.9702	4.59688	0	0	0	0	0	0	4.00345	4.05998	5.01303	0	0	0	0	4.0023	4.40246	2.82473	0	4.21316	0	3.60633	3.34851	3.97127	0	0	0	0	0	0	9.97334	0	4.11636	0
hs1251	4.43297	0	0	0	5.36653	0	5.61976	0	0	0	5.15989	0	0	4.14818	0	4.04624	4.61083	0	0	0	0	0	0	0	4.52578	0	0	2.60137	2.33955	0	4.20621	0.0429364	4.01457	0	0	3.00374	0	8.36564	0	0	4.5157	0	4.25026	0	0	0	4.08197	4.15864	4.08725
hs602	0.0825154	0	0	0	0	0	0	0	0	0	0	0	0	0	0	0	0	0	0	0	4.62893	5.3851	0	8.15962	0	0	0	0	0	0	0	0	0	0	4.16622	0	0	5.14388	0	0	4.50585	4.14101	4.45967	4.26122	0	4.32239	4.02319	4.52023	4.28735
hs636	10.4772	12.7822	3.81431	0	0	0	4.20551	0	0	0	8.75762	0	4.33807	0	0	4.18376	4.2204	0	0	4.21325	0	0	0	8.49297	0	0	0	8.65789	12.751	12.8517	4.3098	1.13655	4.32698	4.04431	0	4.13668	0	4.6517	4.64397	0	4.08249	4.02182	4.19382	9.74938	4.01323	0	0	5.11295	4.09963
hs741	8.4513	3.99469	4.20273	0	0	4.21325	4.19586	0	0	0	0	0	0	0	0	0	0	0	0	4.39903	0	0	1.71886	0	4.57458	0	0	4.73758	4.73758	4.43685	0	0	0	0	3.53313	4.14448	0	4.3019	0	0	0	0	0	4.6073	4.18046	0	0	0	0
hs256	0	4.91087	0	0	0	0.200886	0	0	0	0	0	0	0	0	0	0	0	0.242867	0	0	0	0	0	0	0	0	0	0	0	0	4.25493	0	4.19654	0	0	0	0	4.21968	5.07572	0	4.40782	0	0	0	0	0.036083	4.14327	13.1173	4.17393
hs1254	4.63827	0	0	0	0	0	0	4.25026	0	5.4318	0	0	0.0316528	5.11367	0	0	0	0	0	0	5.24642	0	0	0	0	0	0	0	0	0	0	0	0	0	0	0	0	4.61508	4.82177	0	4.38736	4.01322	4.94253	0	0	0	4.04351	4.1126	4.35516
hs257	0	0	0	0	0	0	4.35556	0	0	0	4.68403	0	0	4.22915	0	9.03818	8.79141	0	0	0	0	0	0	0	0	0	8.7314	0	3.66983	0	4.10073	0	0	0	0	0	0	0	0	0	0	0	4.09474	0	0	0	0	0	0
hs1413	4.32883	0.559065	0	0	4.31966	0	0	0	0	3.75965	0	0	4.93939	0	0.110811	0	0	0	0	1.1419	3.82828	0	0	0	4.02532	0	0	0	4.16431	4.29757	0	0	0	0	0	0	0	9.98663	0	0	0	0	0	5.00356	0	0	0	0	0
hs832	4.37922	0	0	0	0	0	4.17914	0	0	0	0	0	0	0	0	0	0	0	5.37161	4.39147	0	5.15927	4.20482	5.00877	0	4.13243	0.0411859	4.70774	4.40671	4.85387	4.07314	0	0	0	0	0	0	4.1986	0	0	0	0	0	0	14.2946	0	0	0	0
hs784	12.5985	13.2785	0	0	0	0	0	0	0	0	0	0	4.41454	0	0	0	0	0	0	0	0	0	0	0	4.30715	0	0	4.70774	12.4704	13.0107	4.28036	0	4.06919	0	4.0682	4.80653	0	0	0	0	4.10142	0	0	4.2993	0	0	0	0	0
hs1990	0.183651	0.0543527	0.204506	0	0.0122989	0.0209896	0	0.0238098	0.0706358	0.0269308	0.0566227	0	0.017735	0	0	0	0	0	0	0.0139203	0.0290884	0.0130001	0	0.0659884	0.0172342	0	0	0	0	0	0.0700607	0.38497	0	0	0.907421	0	0	0.59935	0.944191	0	1.16861	0.0302234	0.869217	0.066806	0.406282	0.0960732	0.0287613	0.531888	0.87814
mm675	0	0	0.37577	0	1.57801	0	0	0	0.0118099	0	0	0.303651	0.132658	0	0	0	0.186137	0	0	0	0	2.68727	0	0	0.558011	0	0	4.04444	0	4.03091	0	0	0	0	0	0	0.0195342	0.764392	1.17449	0	3.55583	1.21079	0	0	0	0.0142697	0.972831	1.28628	0
hs1982	0	0.014446	0	1.63017	0	0	0	0	0	0	0	0	0	0	0	0	0	0	0	0	0	0	1.32936	0	0	0	0	0	0	0	0	0	0	0	0.0137412	0	0	0.0579232	0	0	0	0	0	0	0	0	0	0	0
mm1370	13.1162	3.75853	0	0	0.144678	0	0	0	4.29331	0	3.19815	3.86098	1.5074	0	0	0	0	0	0	0	0	0	0.74223	0.0642772	3.90392	0	0.0151325	0.114739	0.0157284	0.196614	0.447114	0.46439	0.163694	0	0.0760706	0.010348	0	0.427294	0	0	0	0	0	8.53589	0.0761852	0.0600411	0	0.348049	0.0505783
hs1707	0.0417148	0	0	0	0.173348	0.0853449	0.0580755	0	0.4507	0	0	0.9071	0	0	0	0	0	0	0	0.0572791	0.0706276	0	0	0.393794	0	0.0417081	0.176006	0.0514232	0.0514232	0.0499037	0.629951	0.650877	0	0	0.690429	0	0	0.0600005	0	0	0	0	0	0	0	0	0	0	0
hs1361	0	0.0295733	0	0	0.0271987	0	0.017409	0	0	0	5.07649	0.188141	0	3.85018	0	0.0775372	0	0	4.37366	0	0	0	0	0.0332397	0	0	0	0	0	0	0.0760753	0.0224951	0.0985827	0	0.418698	0	0.374258	0.518667	0	0	0	0	0.742868	4.02349	4.42366	4.26757	0	4.07326	0.0326689
hs1872	0	0	0	0	4.06451	0	0	0	0	0	0	0	0	0	0	0	0	0	0	0	0	0	0	0	0	0	0	4.46852	4.97062	4.27654	8.83536	9.30869	4.11126	0	4.99913	0	0	0	0	0	0	0	0	0	0	0	0	0	0
hs657	0.0205903	1.12301	0	0	0	0	0	0	0	0	0	4.12148	0	4.34008	0	0	0	0	0	0	0	3.55176	0	0	0	0	0	0	0	0	4.22841	0	4.03668	0	4.44129	4.5817	4.12901	0	4.78952	0	4.72171	0	0	0.0194311	0	0	0	0	0
hs948	0	0	0.0118066	0	0	0	0	0	0	0	0	0	0.0214148	0	0	0	0	0	0	0	0	0	0	0	4.21297	0	0	0	0	0	3.25407	0	3.34938	0	0	0	2.14152	0	0	0	0	0	0	0	0	3.12851	0	0	0
hs1614	0	4.44292	0	0	0	0	0	0	0	0	0	0.0175926	2.05534	0	0.0915997	0	0	0	2.15327	0	0	0	0	0	4.04964	0	0	0	0	0	0	0	0.0352748	0	0	0	0	13.2597	0	0	1.92328	0	0	0	0	0	0	0	6.04989
hs1891	4.2903	4.50667	0	0	0	0	4.18031	0	3.8891	3.01263	0.0116954	5.01302	0.30543	0	4.83317	0.0471586	0	0	0	4.12657	0	0	4.60927	1.46235	0	0.0101686	0.0631092	0	3.42675	0	0.240135	3.57872	4.20376	0	0.406833	0	0	1.13731	4.11766	2.96655	8.40408	7.54175	4.69466	0.0102708	0	0.0326257	0.0130015	3.43185	4.26714
mm19	0.0600584	0.829158	1.86884	8.87136	2.64663	4.36351	4.5867	0	4.13018	0	0	4.56981	0	0	0	0.559517	0	8.17032	0	4.81816	0	0	4.5867	9.36556	0	0	0	0	0	0	0	0	2.30907	0	4.19339	0	3.09853	0	4.80554	0	0.0370423	5.00174	0	0.0787925	8.67688	0	0	12.9647	4.05355
hs2128	8.22035	0.260439	0	0	0	0	0.0103727	3.89987	0	0	0	0.866135	0	0	0	3.74086	3.75188	0	0	0.0195661	0.214061	0	0.264358	6.45927	3.74584	0	0	15.0341	12.7662	7.99154	0	0	0	0	0.0199519	1.12338	0	5.5803	0.0335959	0	0	0	3.25083	9.49529	0.41642	0	3.44809	11.5628	3.59462
hs2127	1.2223	1.13256	0.407624	0	0	0	0	0	0	0	0.11508	0.365883	0.545197	0.0885226	0	0.0438678	0.0280244	0	0	0.437664	0	0	0	8.01497	0	0	0.602583	1.49319	1.25419	0	0.550183	0	0	0	0.0159959	0	0.0310772	5.91195	0.726584	0	0.418657	0.0662479	0.0355619	0.971232	0	0	0	0.762402	0
mm1392	0.0367713	1.82981	0.873237	0	0	2.23294	2.12878	2.57815	0.134856	2.40898	2.17269	0	2.77834	4.28883	0	0	0.101862	0	0	2.0542	2.43844	0	2.76463	0.0336997	3.07897	0	0.115673	1.51081	1.40581	1.00565	0	0.668074	0	0	0.0124505	0	0	1.22139	0	0	1.98367	0	0	0	0.0394188	0.0276858	0	0	0.0302272
mm250	0	0.211624	0	0	0	0	0.0271162	0	0	0	0	0	0	0	0	0	0	0	0	0	0	0	0	0	0	0	0	0	0	0	0	0.0324381	0	0	0.0572735	0	0	0.166704	0	0	0	0	0	0	0	0	0	0	0
mm890	1.82367	1.96044	0	0.0427465	0	4.69622	4.71444	4.20343	0	4.68194	0	4.0013	4.0596	0	4.4637	0	0	0	0	5.22594	4.54821	0.099067	0	4.58075	0	0	0	4.95468	5.36792	4.74473	0	0	0	0	0	0.133499	0	0.0706776	4.44762	0	0.802851	3.02438	0	5.10958	0	1.26066	0.340082	9.05533	4.45967
mm888	0	0	0	0.0204125	0.0195532	0	4.0048	0	0	0	0	4.27751	3.88793	0	0	0	4.00296	0	0	0	0	0	0	0.0244933	0	0	0	4.42255	0.0100999	0	0.0171012	0	2.09453	0	0	0.0532184	0.0137088	2.51644	3.49233	0	3.63121	0	3.76265	1.44132	0.0349295	1.22442	0	0.211969	0.0311042
hs499	0	0	0	0	0	0	0	0	0	0	0	0	5.38151	0	0	0.0128325	4.40121	0	0	0	0	0.128523	0	0	0.0251752	0	0	0	0	0	4.302	0	4.27601	0	4.92584	4.4583	0	0	0	0	0	0	0	0	0	0	0	0	0
hs1428	4.07524	4.27003	0	0	0.172534	0	0	0	0	0	0	0	0	0	1.70787	0.0767877	0	4.09763	0	0	0	4.83927	0	0	0.0182478	0	0.588273	0.0505153	0.0235014	0	1.82085	6.37459	1.40528	0	4.48785	0	0	4.69445	0	0	1.1207	0.95087	0	0	0	0	0	0.752172	1.40747
mm97	0.384107	0.843779	0.133893	0	0	0	0.023393	0	0.0931122	0	0.0183511	0.181796	0.0601043	0	0	0	0	0.0679954	0	0	0	0	0	0.0149612	0	0	0	0.417776	0.417776	0	0	2.57042	0	0	0	0	0	0	0	0	0	0	0	0	0	0.028434	0	0.0173772	0
mm164	0	0	0	0	0	0	0	0	0	0	0	0	0.0613987	0	0	0	0	0	0	0	0	0	0	0	0	0	0	0	0	0	0	0	0	0	0.709177	0	0.119283	0	0.278057	0	0	0.297303	0	0	0	0	0	0.334298	0
mm93	0	0	0	0	0	0.434828	0	0	0	0	0	0.890484	0	0	0	0	0	0	0	0	0	0	0	2.56952	0	0	0	0	0	0	0.0470729	2.50699	0.0532217	0	0.0491992	0.0298331	0.432515	0.0281643	4.47914	0	0.0332709	0.362986	0	0	0.221538	0	0	3.45421	4.81409
mm143	0.772121	3.61732	0	0	0	0	0.559488	0	0.138812	0	0	0.525656	0.336838	0	0	0	0	0	0	0	0	0	0	0	1.01061	0	0	0.959581	0.78426	0	0.512739	0.24178	0	0.0628626	1.44304	0.0318364	0.0351567	4.084	4.34948	0	4.4239	0	0.493189	1.92757	0	0.174378	0	0.55115	0.156833
hs2263	0	15.4545	7.96456	0	0	0	0	0	0	0	0	9.59051	5.9415	4.67414	8.78754	0	0	0	0	0	0	0	4.15243	2.01557	0	0	0	0	0	0	4.65859	0	4.0804	0	0	0	0.0331267	8.26867	0.580002	0	1.70582	0	0.548378	0	0	0	0	0.435268	0.510524
hs2216	0	0	0	0	0.0691056	0	0.218715	0	1.14991	1.01873	0	3.36958	0	4.042	0	4.01315	0	4.21965	0	0	1.99039	1.62222	0	4.38366	0	0	0	0	0	0	2.13747	3.67697	2.4682	1.55765	4.78516	0	0	4.33442	5.69835	0	3.80811	4.45842	4.63328	0	0	0	4.70532	5.17631	4.43096
hs671	0	0	0	0	0	0	0	0	4.11464	0	0	0	4.20412	4.97881	4.92104	2.80699	0	0	4.1343	0	0	4.54975	0	1.96381	4.25649	0	4.47108	0	0	0	0	0	0	0	0	0	0	0	0	0	0	0	0	0	6.31247	0	0	0	0
mm1327	2.69415	5.27113	0	0	0	0	2.77644	0	0.310834	0	0	0.0209417	4.35881	0	0.699394	0	0.904123	0	0	0	0.0657266	0.0745495	0	1.00476	3.53717	0	0	3.49237	2.83333	3.16058	0.158376	0.149839	0	0	0.91547	0	0	0.0420469	3.49934	0	0	0.0715897	0.047443	0.0844437	0.118545	1.51074	0	3.34063	2.26037
mm434	0	0.110136	0	0	0	0	0	0	0	0	0	0.818485	0.161045	0	0.115252	0	0	0	0	0	0	0	0	0	0.0488091	0	0	0	0	0	0.0772594	0.126619	0	0	0	0	0	0	0	0	0	0	0	0	0	0	0	0	0
mm1360	0	0	0	0	0.0108869	0	0	0	0	0	0	3.26293	0.281506	0.0256663	0	0	0	0	0	0	0	0	0	0	0.139061	0	0	0	0	0	0.239223	0.248209	0.0444163	0	0.454341	0	0	0.0310547	0	0	0	0.11299	0.0788171	0	0	0	0	0	0
mm435	4.74958	9.9959	0	0	0	0	0	0	0	0	0	0	1.17416	0	0.779893	0	0	0	0	0	0	0	0	0	3.33905	0	0	0	0	0	0	0	0	0	3.90043	0.0345359	1.17966	3.76876	0.556484	0	3.9342	0	0	0	0	0	0	0.706042	0
mm436	0	2.8825	0	0	0	0.0129082	0	0	0	0	0	0	0.0232521	5.64744	0	4.61798	4.72584	0.0102973	0	0	0	0	0	4.05156	4.4698	0	4.13253	0	0.0107218	0	0	0	4.04316	0	0	0	0	0	0	0	4.1343	0	0	0	0	0	0	0	0.0191832
hs981	0	5.14691	0	0	0	0	0	0	0	0	0	0	4.11108	0	0	0	0	4.35356	0	0	0	0	4.81816	0	0	0	0	4.23544	4.15739	4.04096	0	1.50444	0	0	3.08094	0	0.462266	6.92455	0	0	0	0	0	0	0	0.0613647	0	4.1432	0
mm929	0	1.55367	0	0	0	0	0	0	0	0	0	0	0	0	0	8.57129	3.03954	0.320977	0.0543505	0	0	0	0	4.54462	0	0	0	4.69878	4.39846	4.69878	0.0135534	0.837655	0	0	0.0127436	0	0.0469734	7.13734	1.39226	0	5.51937	0	0.773458	0	0.0455985	0	0.690206	1.22266	4.13582
hs926	0.613825	0	0	0	0	0	0	0	0	0	1.86454	0.21893	4.15773	0	0	0	0	3.42718	0	0	0	0	0	4.20241	0	0	4.35748	0	0.473067	0	0	3.41935	3.58525	3.94333	3.10003	0.185451	5.02	5.04611	4.95608	0	0	0	0	0.489789	0.168459	3.30107	0	8.48282	3.744
hs928	3.65128	0.163382	0	0.0139525	0.0167113	0	0.511768	0	1.38276	0	0	0	0	0.517619	0.61715	0	0	0.0185635	0	0	0	0	0	2.97968	4.00612	0	4.38168	0	0	0	4.13903	0	0.0152639	0	4.73813	0	0	0	4.34222	0	0	4.0051	0	0	0.0313934	0	0	4.30739	7.72563
hs559	0	0	0	0	0	0	4.8041	0	0	0	0	0	0	0	0	0	0	0	0	0	4.08431	0	0	4.43605	4.38195	0	4.13906	0	0	0	0	4.1209	0	0	4.51145	0	0	13.0447	0	0	0	8.95556	0	0	0	0	0	4.22728	4.51856
mm930	4.91506	0	0	0.152263	0	8.96711	8.42514	9.28397	0.129893	13.9426	0	0	0	4.55573	0	0	0	0	0	4.22518	9.32914	3.73977	4.806	4.46338	0.206927	0.592632	4.07038	0	0	0	0	0	4.24346	0	4.07631	0	4.58817	0.168486	0	0	0	0	0	1.98757	0	6.29344	0	4.27014	4.02906
hs931	3.93621	0	0	0	0	0	0	0	0.0450631	0	0.0150632	3.75285	4.19466	0	0	0	0	0	0	0	0	0	0	0	4.03835	0	0	0.0472534	0	0	0	0	0	0	0	0	0	10.4355	3.93815	0	0	0.0963726	0	0	0	0	0	0.0180071	0
hs927	4.64016	0	0	0	4.61656	0	0	0	0	0	0	0	4.45765	0	0	0	0	0	0	4.33987	0	0	3.98294	0	9.87874	0	0	4.72893	4.72893	5.4079	0.925242	0	0	0	0	0	0	1.8802	8.55632	0	4.05747	0	0	0	0	0	0	3.50473	0
hs424	0	2.45347	0	0	0	0	0	0	0	0	0	0.514872	0.0831605	0	0	0	0	0	4.1707	0	0	0	0	9.124	0	5.12205	13.5294	4.71661	4.71661	4.41459	0	0	0	0	4.15614	5.07935	4.41567	0	4.05091	4.04398	4.37899	4.05569	4.28748	0	0	4.17296	0	4.0846	3.37606
hs929	0	0	0	0	0	0	0.0327673	0	0	0	0	0	0	4.37716	0	0	0	0	0	0	0	0	0	0	0	0	0	0	0	0	1.12555	0	0.715829	0	2.32322	0	0	0.0166494	0.0226946	0	0	0	0	0	0	0.0216402	0	0	0
hs930	0	3.69011	0	0	0	0	0	0	3.68756	0	0.290565	4.28655	4.23276	0	4.78697	0	0	0	0	0	0	0	4.58533	0	0	0	4.35369	4.04048	4.06349	0	0	0	0	0	0.364684	0.373525	0.478915	8.25944	0	0	5.0801	0	0	0	0	0.0151883	0	0	0
hs500	0	0	0	0	2.49553	0	0	0	0	0	0	0	0.130694	0	0	0	0	0	0	0	0	0	0	0	0	0	0	2.73285	2.5581	2.73285	0	0	0	0	0	0	0	0	0	0	0	0	0	0	0	0	0	0	0
hs507	0	0	0	0	0	0	0	0	0	0	0	0	0	0	0	0	0	0	0	0	0	0	0	0	0	0	0.0151257	0	0	0	0	0	0	0	0	4.03179	0	0	0	0	0	0	0	0	0	0	0	0.0107181	0
hs2021	0	0	0.426418	1.14574	0	0	0	0	0	0	0	4.91621	0	6.57231	0	0	0	0	0	0	0	4.4282	4.09992	0	3.97976	0	3.79925	0	0	0	0	2.99624	0	0	1.92336	0	0	0	3.3722	0	0	0.790339	2.72127	0	0	0	0	3.01828	1.05995
hs1050	4.11014	4.12436	0	0	0	0	0	0	0	0	0	4.19518	0	4.4023	0	0	0	3.8625	0	4.13902	0	0	0	5.82301	0	0	0	9.02101	4.40671	10.6816	3.85342	0	0	0	8.19462	0	0	4.29499	0	0	0	0	0	4.76504	0	0	0	4.10703	0.0475523
hs1545	0	8.80795	0	0	1.26727	0	0	0	0	0	0	4.53483	6.23415	0	0	4.95078	6.41794	4.91701	0	0	0	0.561362	0	0	0	0	0	0	0	0	0	0.0192714	3.75764	0	4.442	0	4.14467	4.26254	2.52809	0	0	0	0	4.87643	4.36111	0.634928	0	0	5.68145
hs918	4.47611	4.42036	0	0	4.96295	5.2426	7.55131	4.00612	4.00877	4.36552	0	0	0	0	4.49743	0	0	0	0	0	8.32022	8.67702	4.2966	4.53266	4.4131	0	0	4.70702	4.70702	4.40618	4.70178	4.12191	4.46566	0	9.83896	0	0	4.21031	0.0140839	0	0	0	0	0	0	0	0	0	0
hs260	0	8.75614	0	4.04239	4.08355	0	0	0	0	0	0	0	0	0	0	0	0	0	0	0	0	0	0	0	0	0	0	0	0	0	9.98515	7.6297	7.99297	0	7.41179	0	0	4.9431	0	0	0	0	0	0	0	1.93665	0	0	0
mm4	0.532374	0.170306	0.0102244	0	0.21589	0	0	0.389854	0.180969	1.1786	0	0	0.385189	3.81005	0	0	0.727704	0.211756	0	0.410113	0	0	0	3.73372	0	0	0	0.158419	0.720633	0	0.242458	0.82044	0	0	1.02631	0	0	0	1.42924	0	0.0862573	0	0.163933	0.647861	0	4.70403	2.45686	3.26224	2.60863
hs2086	4.36095	0.10563	0	4.04331	0.241811	0	0	0	0	0	0	4.15494	4.08872	0.094298	0.0965121	4.34595	0.0269481	3.8228	0	0	0	0	0	4.25159	0.0991797	0	0.0231116	4.64392	8.59164	4.64392	0	0	0	0	0.081022	0	0	3.68497	4.11777	0	0.110786	0	0.236582	4.07339	0	0.706595	0	0.450582	0
hs1691	0	0	0	0	0	0	0	0	0	0	0	0	0	0	0	0	0	0	0	0	0	4.25148	0	5.95086	0	0	0	0	0	0	0.0657306	0.0314616	0	0	0	0	0.0242323	5.75294	0	0	0	0.017078	0	0	4.00393	0	0	4.34278	0
hs1438	8.94719	0	0	0	2.88207	4.64397	4.17914	4.65758	0	4.63264	0	4.21896	0.0103622	3.66141	0	0	0.292367	0	1.67788	4.16115	4.54061	1.7048	5.36957	0	0	0	4.10458	0	0	0	4.35067	5.70333	4.72125	0	4.11407	0	0	2.88827	0	0	0	0	0	9.79796	5.86736	1.60226	0	0	0
hs327	4.3851	8.80902	4.07212	0	0	0	0	0	0	0	4.12321	3.7673	0	0	4.53669	0	4.06905	0	0	0	0	0	0	10.7924	0	0	0	0	0	0	4.51145	12.4467	8.08865	4.28067	4.144	0	4.30479	0	0.98071	0	1.02151	0.785735	4.52901	0	0	0	0	1.43941	1.20628
hs1068	4.82391	5.41454	0	0	0	0	0	0	0.681601	0	0	0	0.426366	0	0	0	0	0	0	0	0	4.13549	0	0	0	0	4.14146	0	0	0	0	0	0.805922	0	1.05251	2.05066	4.42251	5.03668	0	0	0	0	0	5.53611	1.53821	0	0	0	0
hs1107	4.64016	0	0	0	0	0	0	0	0	0	0	0.0844294	0	0	0	4.09093	4.23393	0	0	0	0	0	0	0	0	0	0	4.07109	4.17328	0.0119633	0	0	0	0	4.54936	0	0	0	3.30602	0	0	0	0	0	0	0	3.39169	3.39269	3.24509
hs1216	0	0	0	0	0.0111167	4.70333	4.14327	0	0	0	4.63451	0	0	0	0	2.69267	2.55556	0	0	0	0	4.046	0	0	4.92975	0	4.61979	0	0	0	4.32057	1.05129	4.61938	0	0	1.92832	1.08381	0	0	0	0	0	0	0	0	4.05306	0	0	0
hs878	4.41567	4.19314	0	4.2161	0	0	4.42481	0	0	0	4.73209	0	0	0	0	4.25104	0	0	0	0	0	0	0	0	0.0408615	0	0	4.64016	8.86856	0	0	4.25869	0	0	4.60097	0	0	0	5.88528	0	0	4.04001	0	0	4.1269	0	4.19654	6.964	0
hs1135	9.29079	4.70333	0	0	4.0819	0	4.04686	0	0	0	0	0	0.0170173	0	0	0	0	0	0	4.40673	4.13253	4.07314	0	0	0	0	0	0	0	0	4.16685	4.01682	4.03433	0	0	0	0	0	0	0	0	4.2993	0	4.08302	2.74268	3.15658	0	0	0
hs1200	2.16089	2.36752	0	0	0.0136354	0	0	0	0	0	0.0774457	0	0.220581	0	0	0	0	0	0	0	0	0	0	0	0.402194	0	0	0	0	0	0	0	0	0	0	0	0	0	7.11684	0	1.83131	0	0	0	0.0287677	0	0	4.93521	4.17745
hs1198	0	0	0	0	0	0	8.60905	0	4.13966	0.0421067	0	0	1.63221	4.05497	0	4.23732	4.35262	4.8634	0	0.0116934	0	4.06854	0	0	4.05833	0	0	0.0579947	0.0544309	0	4.95959	4.12016	0	0	0	0	0	0	0	0	0	0	0	0	0	2.58334	0	0	5.0065
hs1055	4.64016	0	0	0	0	4.6073	4.19314	0	0	4.42136	0	0.771807	0	0	4.32883	0	0	4.13275	0	4.91364	4.62709	9.33637	4.54668	0.0313628	4.63827	0	0	0	0	0	0	2.07949	5.95041	0	0	4.16355	4.20761	5.86967	0	0	0	0	0	4.07779	3.21714	0	0	3.45681	3.61703
hs1058	4.3439	4.91721	0.0505932	0	0	0	0	0	0	0	1.73305	0	0	0	0	0	4.35853	0	0	0	0	4.37161	0	4.67191	0	0	0.012747	0	0	0	0	0	0	0	0	0	0	0.825038	0	0	3.45433	0	0	0	0	0	0	4.03198	0
hs1002	0	4.67572	0	0	0	0	4.10247	0	4.16292	0	2.09368	4.01323	0	0	0	5.21729	6.11749	0	0	4.33201	0	0	0	0	0	0	4.22257	8.46144	4.24142	0	2.7994	4.15058	0	0	0	0	0	2.34016	4.91009	0	4.66959	4.62525	4.55596	0	0	3.80458	4.06702	8.80316	0
hs1217	5.02595	0	0	0	0	0	0	0	0	0	4.80967	0	0.0850142	0	3.38213	0	4.22403	0	0	0	0	4.09559	0	4.17112	0	0	0	4.40894	8.53513	0	0	0	0	0	0	4.5164	4.17178	0.0294271	0	0	0	0	0	7.25916	0	4.30539	0	12.7504	0.0121746
hs323	8.25886	0	0	0	0	0	0	0	0	0	0	0	0	4.67132	0	0	0	0	0	0	0	0	0	0	4.73755	0	0	0	0	4.32239	0	7.12779	0	0	4.41454	0	0	11.3562	0	0	0	0	0	0	0	0	0	0	4.08725
hs1161	12.3051	4.50447	0	0	0	0	0	0	0	0	0	3.60385	0	0	0	0	0	0	0	0	0	0.074621	0	0	0	0	0	12.8638	8.8092	8.24675	0	4.00833	0	0	0	0	0	0	0	0	0	0	4.53947	8.39422	0	0	0	0	0
hs174	30.593	4.85699	0	0	0	0	0	0	0	4.17198	0	0	0	0	0	4.39147	4.79048	0	0	0	4.09691	0	0	4.27984	4	0	0	9.46992	12.426	0	0	0	0	4.08513	0.260856	0	0	4.66917	8.22938	0	4.01457	0	4.1986	22.2044	0	1.84369	0	4.36957	0
hs1134	4.49349	4.59176	0	0	0	0	3.71382	0	0	4.41454	0	0	4.02411	0	0	0	4.56021	0	0	0	0	0	0	0.285111	0	0	0	0	0	4.16115	0	4.20621	0	0	12.9126	0	0	0	4.39775	0	0	0	0	8.55418	0.167879	4.38828	0	4.27619	5.2993
hs809	4.55284	4.55596	2.61022	0	4.01844	0	4.27819	0	0	0	0	4.28316	0	0	4.68902	0	0	0	0	0	0	0	0	4.09081	0	0	4.33536	8.10611	8.10611	4.0048	5.62468	4.04287	5.03975	0	6.11093	0	2.49998	4.73893	4.57499	0	7.96603	4.72816	5.49349	4.15739	4.61798	1.4498	4.02687	4.94145	4.55129
mm311	0	0	0	0	0	0	3.69002	0	4.31568	0	0	0.185366	2.41321	0	3.48392	3.69921	3.71789	3.59964	0	3.52127	4.34379	4.55717	0	0	0	0	0	0	0	0	4.008	0	0	4.06366	5.48023	0	0	6.4356	0	0	0.0592007	0	0	0	0	0	0	0	0
hs445	0	0	0	0	0	0	0	0	2.10185	0	0	0	0	0	0	0	0.0516673	0	0	0	0	0.0350903	0	0	0	0	0.783642	0	0	0	0	1.95395	1.63338	0	0.591791	0	0	2.82693	0	0	0	0	0	4.18351	0	0	0	0	0
hs444	0	0	0	0	0	0	0	0	0	0	0	0	0	0	0	0	0.011351	0	0	4.11042	0	0	0	4.18709	0	0	0	0	0	0	0	0	0	0	0	0	0	1.80904	0.47954	0	0.440594	0	0	0	0	0	0	0.400241	0
hs443	8.98457	4.13966	0	0	0	0	3.02906	0	0	0	0	0	0	0	0	0	0	0	0	0	0	3.34531	0	3.38329	0	0	0	4.4168	5.97062	4.24109	6.16355	5.74305	6.94584	4.28351	2.8566	0	0	0	0	0	0	2.59968	0	0	0	0	0	0	0
hs442	5.28735	0	0	0	0	4.63264	4.04335	0	4.12668	0	0	0	0	0	0	0	0	0	0	4.53462	4.12901	0	0	0	0	0	3.72324	0	0	0	0	0	0	0	0	0	0	6.20732	9.03944	4.37059	8.78087	8.25949	0	0	0	0	4.31584	9.25042	4.24061
hs441	4.57512	0	0	0	1.1358	0	0	0	0	0	0	0	0	0	4.95861	0	0	0	0	0	0	4.14965	0	8.13028	0	0	0	4.23284	4.23284	0	0	0	4.65365	0	0	4.15739	4.07935	0	0	0	0	0	0	4.16494	0	0	0	0	3.41056
hs440	5.10262	4.41454	0	0	0	3.84629	0	0	0	0	0	0.0306743	4.39874	0	0	0	0	0	0	0	3.82704	0	0	0	5.2023	0	3.69571	4.70774	4.70774	4.40671	0	0	0	0	0	0	0	0	0	0	0	0	0	4.76025	0	0	0	4.13966	0
hs439	0	0	0	0	0	0	0	0	0	0	3.71095	0	4.15428	3.38839	0	0	0	0	0	0	0	0	0	0	0.0212109	0	0	0	0	0	0.702279	0.876306	0	0	0	0	0	0	0	0	0	0	0	0	0	0	0	0	0
hs438	0	3.79401	0	0	0	0	0	0	0	0	0	4.42829	0	0	0	0	0	0	0	0	0	0	0	1.08755	0	0	4.48945	0	0	0	0	0.257575	0	0	0	0	0	4.15808	0	0	0	0	0	0	0	0	0	4.68479	0
hs437	0	0	0	0	0	0	0	0	0	0	0	0	0	2.09531	0	0	0	0	0	0	0	0	0	0	0	0	0	0	0	0	0	0	0	0	0	0	0	4.46282	0	0	0	0	0	0	0	0	0	4.49492	0
hs436	0	0	0	0	0	0	0	0	0	0	4.5397	0	0	0	0	0	0	0	0	0	0	0	0	7.03731	0	0	0	0	0	0	0	0	0	0	0	0	0	4.51426	3.57508	0	0	0	0	0	0	0	0	3.37294	0
hs1989	0.0448396	4.39275	0	0	0.0482616	0	0	0	2.85905	0.0429607	0	0	0	0.0133204	0	0	0.0176294	0	0.0162359	0	0	0.890383	0.221942	3.15463	1.59585	0.302389	0	0	0	0	0.52727	0	0.526979	0	0.201256	0.0510612	1.16946	2.3089	3.27127	3.06036	3.25949	4.78787	3.27989	0	0	0	0.0130479	5.90204	0.135511
mm72	0	0.0275631	1.12439	0	0.0193769	0	0	0	0.0444233	0	0	0.422489	1.58264	0	0	0	0	0	0.925089	0	0	0	0	0	0	0	3.05212	0	0	0	1.39021	0.195723	0	0	0.17151	0	0	0.408569	0.0305461	0	0	0	0.116216	0	0	0	0	0	0
mm718	4.41567	8.2111	0.728157	0	4.28748	4.71385	4.50724	4.267	0	4.21908	1.85246	3.81753	8.42045	9.13464	3.97233	4.61261	5.27205	4.32018	0	4.1757	5.01073	4.38645	4.78208	0.231231	4.1209	0	0	0	0	0	0.157496	0.117887	0.133311	0	0	0	2.30981	7.25619	4.15304	3.06747	7.58401	5.08975	0.129448	1.78437	0	3.05092	0	0.126828	3.06283
hs1364	0	4.07479	0.523867	0	0	0	0	0	0	0	0	0.100575	2.48965	0.906017	0	0	0	0	0	0.0322559	0	0	0	0.764944	3.87774	0	1.98868	0	4.88378	0	0.669495	0.0875615	0.0660146	0	0	0	0.0168835	0	0	0	0	0	0	0	0	3.80311	0	0	0
hs2029	8.05316	4.14535	0	0	2.71905	0.0147785	0.0141323	0	0.0465431	0	0.0106522	5.53632	0	0.0190577	0	0	0	0.0419152	0	0.0162471	0	0	0.0127482	0.0128271	0	0	0.0296283	0.801999	0.801999	0	3.76536	0	0	0	4.65846	0	0	3.25378	3.34011	0	0	0	0	8.59843	0	0	0	3.42313	0
hs1326	0	4.55515	0	0	0.0225531	4.3343	4.10508	0	0	3.84602	0	3.92505	0	4.82681	0	0	0	0	0	4.19022	3.9901	8.5972	4.38219	8.05874	4.59007	0	4.26922	0	4.40328	3.34893	4.4023	3.99612	4.08302	0	1.85939	4.24642	0	3.10984	0	0	0	0	0.120789	0	3.97384	0.0358636	0	3.97608	0
hs756	0	0	0	0	0	0	0	0	0	0	4.33068	0	0	2.93687	0	0	0	0	0	0	4.43896	4.34582	0	6.36405	4.01592	0	4.83188	4.29585	4.37296	0	3.9483	3.68234	0	0	4.0477	0	0.255421	0	6.25214	0	4.18086	6.1929	6.33901	0	1.47618	0	0	9.13339	3.83856
hs1599	0	0	4.63051	0	0.22803	0	0.231739	0	0	0	0	0.840473	0	0.794476	0	0	0	0	4.2993	0	4.03152	4.42713	0	0	4.50446	0	0	0	0	0	0.232579	0	0	0	0	0	0	4.59176	0	0	0.495064	4.16941	0	0	4.43063	4.04191	0	1.54597	0
hs1658	0	4.64948	0	5.09644	1.03167	0	0	0	4.11663	0	0	2.03566	0.0111429	3.96311	0.0117487	4.09134	0.188672	0	4.37191	0	0	0	0	8.02032	0.0475257	0	2.46881	0	0	0	5.93428	5.19461	5.53286	0	10.1985	0	0	1.89505	4.36962	0	3.29984	0	4.01368	0	3.77549	0.095135	0	4.17586	10.4487
hs669	0	4.24812	0	0	0	0	0	0	2.95505	0	0	4.96658	0	0	0	0	4.47756	0	0	0	0	4.06048	0	3.81282	4.09615	0	0	0	0	0	4.96494	0	4.25149	0	4.47927	0	0	8.32856	2.9476	1.1641	1.16306	0	0	4.18509	0	4.01354	0	4.34814	0
hs1601	0	0	0	0	0	0	0.408849	0	0	0	0	0	0	0.0240205	3.32866	0	0	0	0	0.0184133	0	4.10018	0	4.09323	2.76921	0	0	5.27277	4.75747	4.19016	0	0	0	0	0	0	0.0233384	4.35344	5.30627	0	4.81871	0	0	0	0.0181742	0	0	6.24109	4.64397
hs530	4.01233	9.92743	0	0	4.15201	0	0	0	0	0	0	0	4.12668	4.37403	4.74232	0	0	0	0	0	0	0	0	0	0	0	0	4.41794	0	0	8.69107	8.45481	8.96701	4.17393	0	0	4.12603	5.29884	8.36981	3.99123	4.66291	0	0	8.2751	0	0	4.16178	5.37059	0
hs1085	3.75865	3.16919	0	0	0	0	4.08092	0	3.03306	0.0112229	0	7.38755	4.01122	4.57506	0	0.0567914	0	0	0	0	0	0	0	0	0	0	0	0.0372781	0.0394114	0.0359091	2.95167	3.64539	4.27819	0	8.53244	0	0	12.1708	5.4389	0	4.09098	4.61618	4.44491	3.98894	0	0	5.01189	5.31426	4.65758
hs1014	8.36685	0	1.22017	0	0	0	4.37334	0	0	0	2.75391	0	4.51856	1.28133	0	0	0	4.63078	0	0	0	0	0	0	0	0	0	4.70774	8.82182	4.40671	0	0	0	0	0	0	0	4.7167	4.08948	0	0	0	0	4.15428	2.18776	0	0	4.12901	1.0757
hs290	2.50152	2.25348	0	0	0	0	0	0	0	0	0	0	4.59854	0	0	0	0	5.23958	0	0	0	0	0	4.23958	0	0	0	8.46414	0	0	0	0	0	0	4.08092	0	0	6.55789	0	0	0	4.88273	0	0	0	0	0	4.90634	0
hs1081	8.57141	4.42597	4.04239	0	0	0	0	0	0	0	0	0.842419	0	4.08373	4.19314	4.20448	4.25243	8.58732	0	0	0.0741051	0.0803762	0	3.29361	0	0	0	4.15739	0	0	4.6854	4.56543	0	4.56384	4.96677	4.1707	4.01412	4.15614	4.12668	0	0	0	0	0	0	0.811746	0	0	0.210653
hs1159	8.49262	0	0	0	0.815887	0	4.75449	0	1.83708	0	0	0	0	7.90866	0	0	0	0	0	0	0	0	4.49894	0.0155556	0	0	0	0	0	0	0	0	0	0	0	0	0	10.3319	6.43198	4.56134	5.12391	4.16977	7.13489	0	5.43695	0	0	9.15705	5.41809
hs1128	0	12.7305	0	0	4.15829	4.88273	4.27491	4.15243	0	8.96735	0	0	4.0146	0	0	0	0	0	0	0	7.77802	0	8.59931	8.24908	13.2709	0	0	4.07263	4.64577	0	0.0235177	0	0.0269363	0	0	0	4.64201	4.53611	0.0411603	0	0	0	0	0	0	0	0	0	0
hs288	8.43241	4.35262	0	0	0	0	0	0	4.42481	0	0	0	4.36653	0	0	4.21467	8.69558	4.54821	0	0	0	0	4.27409	4.07529	0	0	4.35929	0	4.19044	0	4.07908	0	0	0	0	0	4.28991	4.08596	0	0	0	0	0	4.67366	0	0	0	0	0
hs284	0	0	0	0	0	0	0	0	0	0	0	0	0	0	0	0	0	4.49349	0	0	0	0	0	4.05799	0	0	4.18243	0	0	0	0	0	0	0	0	0	0	0	0	0	0.155111	0	0	0	0	0	0	0.0961315	0
hs1106	0	2.45892	0	0	0	0	0	0	0	0	0	0	0	0	0	0.0123269	0.364955	0	4.08355	0	0	0	0.0205237	0	0	0	4.50408	0	0	0	4.04723	0	0.0416273	0	4.08171	0	0.0226197	0	0	0	0	0.0363216	0	0	4.45346	0	0	0	0.0497989
hs1233	0	5.4212	0	4.11747	4.00349	4.30954	4.32939	4.46774	4.78622	0	0	0	0	4.04825	4.08714	0	0	0	0	4.32599	4.70273	0	4.33768	4.67344	0	0	4.05617	0	0	0	4.15927	0.197868	4.05998	0	4.4076	0	4.27053	4.39254	4.89526	0	4.95353	0	0	0	4.9393	0	0	4.71409	4.2105
hs563	10.0228	0.450374	0	0	0	0	4.08672	0	0	0	0	0	4.53817	8.75802	0	0	0	0	4.14267	0	0	0	0	4.35458	0	4.20621	4.14691	17.7007	13.6103	4.19928	8.16264	14.7259	0.166454	0	5.61779	0	0.155432	7.57608	4.03793	3.2518	4.04915	0	0	8.10129	0	0	0	4.25759	0
hs567	4.21	3.91696	0	0	0	0	0	0	4.21183	0	6.7691	0	0	0	0	0	4.3706	0	0	0	4.33913	0	0	9.71908	4.77529	0	0	0	0	4.40121	8.55528	5.23732	4.92812	0	0	0.617874	4.00623	4.66354	0	0	1.74469	0	0	0	0	0	4.18759	0	0
hs985	0	0	0	0	0	0	4.53748	0	2.02329	0	4.47581	4.67942	0	4.21947	0	0	0	0	0	0	0	0	0	0.0135286	0	0	0	0	0	0	0	0	0	0	0	0	0	0	0	0	3.16023	4.0381	0	0	0	0	0	0	2.9848
hs283	0	4.30334	0	0	0	4.6968	4.4389	0	0	4.7122	0	0	0	0	0	0	0	0	0	0	4.9914	0	4.73283	0.601132	8.51428	0	4.29011	0	0	0	0	0	0	0	0	4.15543	4.71338	0	0	0	0	0	0	0	0	0	0	0	0
hs995	0	0	5.61646	0	0.0445713	0	0	0	4.07831	0	0	0	4.15366	4.59007	0	0	0	1.37369	0	0	0	0	0	0	2.26098	0	2.8533	0	0	0	0.14766	0.160161	0.058974	0	0.0951808	2.39083	0	11.6125	0	0	4.2315	4.16558	0.139645	0	0	0	0	8.15759	0
hs1054	0	4.66354	0	0	0	0	0	0	5.74091	0	4.8437	0	0	0	0	0	0	4.03858	0	0	0	0	0	5.17238	0	0	0	4.53663	0	4.009	0	4.56188	4.78436	4.03245	3.47406	0	0	4.18988	0	0	0	0	0	0	0	0	0	0	4.43602
hs1220	0	4.89235	3.25634	3.15742	4.73953	2.26917	4.93181	0	1.49745	0	0	0	0	0	0	0	4.31408	0	0	6.8158	2.89836	2.75849	0	4.42597	7.85316	0	4.02182	4.65913	4.37007	0	0.51827	4.03406	0.899794	0.0485317	4.17096	0	2.4984	4.81892	4.23546	0	3.90013	0	0	4.15603	0.038619	1.19125	0	4.35383	0
hs282	0	0	0	0	0	0	0	0	0	0	0	0	0	3.97354	0	0	0	0	0	0	0	0	0	0	0	0	0	0	0	0	0	0	0	0	0	1.9282	2.07825	0	9.42713	4.07109	8.17575	0	0	4.31241	0	0	0	14.3807	8.52631
hs1035	13.1004	0	0	0	4.0942	0	4.71658	0	0	0	0	0	0	4.67935	0	0	1.27935	0	0	0	0	4.1445	0	0.847173	0	0	8.24307	0	0	0	8.27908	5.23324	4.12422	0	5.24024	4.32422	0	10.5542	8.65887	0	4.19851	4.44801	4.358	4.23508	4.04514	0.279324	4.6559	5.42042	9.39975
hs1059	0	0	0	0	0	0	4.39631	0	0	0	1.4391	0	4.1791	0	0	5.16354	0	0	0	0	0	0	0	0	0	0	3.90511	0	0	0	3.73101	4.14953	0	0	0	0	0	0	0	0	3.96166	1.33724	0	0	0	0	0	2.32448	3.26826
hs1564	8.89111	0	0	0	0	0	0	0	0.0401735	0.0301696	0	0	5.79317	3.25829	0	0	0.0437523	0.139482	0	4.21325	0	0	0	20.0587	4.04769	0.660488	4.31867	4.24109	4.24109	4.11577	4.43297	9.03872	8.63715	0	9.89062	4.15614	0.141676	8.6454	10.4462	3.64108	3.84535	3.42379	7.04863	4.11351	4.7122	4.21681	0	7.82266	13.9842
mm1345	4.05061	8.24702	4.33913	0	0.0171825	0	2.45454	0	0	0	4.48528	0	0	4.2652	0	0	0	5.78516	0	0	4.24489	0	0	8.72476	0.705469	0	1.59544	4.53462	4.05948	0.0355887	4.33536	0.128533	0	0	0.625371	0	4.97881	4.13727	0.37012	0	0	0	0	4.36321	0	1.74309	0	2.69805	0
hs978	5.22915	0	0	0	0	0	4.06803	0	4.01818	0	0	0	0	4.25727	0	0	4.60449	0	0	0	0	0	0	0	0	0	0	0	0	4.11976	0	0	0	0	0	3.7779	0	4.74396	0	0	0	4.20105	0	4.26122	0	0	0	13.8396	4.02836
hs676	0	0	4.27165	0	0	0	4.4918	0	0	0	0	0	0	0	4.84402	0	0	0	0	0	0	0	0	0	4.14874	0	5.20831	4.08355	0	0	4.17591	4.15502	4.27298	0	4.93465	0	0	8.45412	0	0	0	4.31426	4.3363	0	0	0	0	0	0
hs1737	0	0	0	0	0	4.09324	6.63202	0	1.86614	0	0	0	0	0	0	0	0	0	0	4.40618	0	0	0	0	0	0	0	4.93405	4.31354	0	0	0	0	0	4.06791	0	0	0	0	0	0	0	4.65723	0	0	0	0	0	0
mm720	4.00199	4.09889	0	0	0.887019	4.43347	4.59688	4.13628	4.23666	4.23639	0	0.340227	4.04866	0	4.74715	0	0	2.86844	0	0	4.18395	4.17457	4.44486	0	2.76666	0	0	0	4.00463	1.72163	3.99067	4.09044	11.8038	0	4.72584	0	0	4.83268	2.64833	0	0.170381	4.06349	4.06008	2.61588	0	4.83585	0	8.78383	4.47886
hs310	5.31605	0	0	0	0	0	0	0	0	0	0	0	0	0	0	0	0	0	0	4.21325	0	0	0	4.15256	0	0	0	5.00612	4.93181	5.30803	0	4.30364	0	0	4.18642	0	0	4.65889	0	0	4.25337	0	4.07572	5.66959	0	0	0	0	0
hs901	0	1.26004	0	0	0	0	0	0	0	0	0	0	0	4.29414	0	0	0	0	0	0	0	0	0	4.13966	0	0	0	0	0	0	4.07831	0	0	0	4.9393	0	4.45223	4.32945	5.09963	0	4.01863	4.04818	0	0	0	0	0	0	0
hs620	0	0	0	0	0.178653	0	0	0	0	0	0	5.35458	0	0.695208	0	0	0	0	0	0	0	0	0	4.17697	0	0	0	4.4626	0	5.21512	0	4.21372	0	0	0	0	4.48945	5.52724	13.7635	4.13371	13.8059	0	0	0	0	4.62034	2.0804	4.55499	2.27532
hs2062	0	0	0	0	0	0	0	0	0.0376765	0	0	0.0434377	0.0143315	0	0	0	0	0	0	0	0	0	0	1.48722	0.0557788	0	0	0	0	0	0.0256195	0	0	0	0	0	0	0.0498623	3.96544	0.168424	3.96448	0	0	0	0	0	0.0131049	4.63276	0
hs1390	0.0849918	0.847947	0	0	0	0	0	0	0.0187856	0	0.0280775	1.22077	0	0	0.240025	0	0	0	0	0.019094	0	0	0	0.089573	0.152817	0	0.319366	0	0.0574796	0	0	0	0.0284653	0	0	0	0	0.0748632	0	0	0.0995802	0	0.0259387	0.0668457	0	0	0	0.396612	0.0336899
hs1596	0	4.73432	0	0	0.0168736	0	0	0	0	0	0	4.3477	0	0	0	4.08454	0	0	0	0.152904	0	0	0	0	0	0	0	4.46517	4.09258	0	0	0	0	0	0	3.65274	3.86838	0.0305378	0	0	0.0102098	0	0	5.02994	0	0	0	0.0324094	0
hs1717	10.1395	2.58351	0	0	0	0	3.55736	0	0.729169	0	0.0170249	0	1.42727	0.0105169	0	7.67389	3.68524	3.3035	4.05277	0.231157	0	4.63542	0.172086	2.78047	4.07454	1.27615	0	13.0283	9.11354	8.70716	0.0468505	0.0325185	0.0394451	0	0.140497	4.31123	4.63252	0.985846	3.3592	0	0.244099	3.02125	0.22714	4.71481	4.04384	0.0328578	2.92189	3.17433	3.28077
hs1606	0.0173782	4.52165	0	0	0	0	0	0	4.55836	0	0	1.58637	4.14889	0	0	0	0	0.0101669	0	0	0	0	0.0939686	0.0305434	8.85253	0	2.24242	0	0.0111408	0.0157005	2.87496	3.52224	0	0	10.9749	0.215429	0.0430904	0	4.98072	4.17634	4.67044	4.065	0.235497	0	0	0.0113532	0	6.53617	5.55146
mm814	4.31046	5.89755	0	0	0.0124759	0	0	0.0839201	0.0398633	0	1.04574	0	8.63983	6.7985	0	0	0	0.0383115	0	0	0	0	0	2.10052	0	0	0	4.15603	1.93062	0	0	0.122295	0	0	0.0477063	0	0	4.37268	4.37366	4.23359	5.42713	0.0122486	8.35315	0.116801	0	0	0	3.9693	0.0706913
hs1398	4.10196	0	0.122439	0	0.159578	0	0	0	1.40845	0.770268	0	0	4.06746	0	4.2093	0	0	0	2.59031	0	0.0460286	0.010286	0	0.312949	0	0	4.11906	4.46685	8.17728	8.71985	0.0827883	3.51409	2.82536	0	0.0988786	0.302118	0	13.06	0	0.681216	0	0.670041	0.649402	4.27203	0	4.04905	0	0.359054	0
mm1344	0	0.87391	0	0	0	0	0.0303762	0	0	0	0	0.0110539	1.05847	4.79048	0	0	0	0.39733	0.487414	0	4.04961	0	0.0225147	2.20577	3.6531	0	0	1.95841	2.02312	2.04623	0	1.13656	0	0	0.981447	0.0111432	0.0101638	5.83653	3.50697	0	0	0	4.14415	0	0.430743	0.0201023	0	4.0467	0
mm261	0	0.0243942	0	0	0	0	0	0	0	0	0.0262621	0.188718	0.738024	0	0	0	0	0	0	0	0	0	0	0	0	0	0	0	0	0	0.43008	0	0	0.378103	0	0	0	0.222061	1.74981	0	0	2.10469	1.9914	0	0	0.100783	1.77037	1.06699	0.0309576
hs1447	0	0	0	0.0101299	0	0.0153702	0.0175746	0	2.91943	0.01714	0	0	4.51145	0.0508552	0	3.91438	4.02078	0	4.06298	0	0.0112395	0	0.0159195	0	0	0	0.0387171	0	2.58103	0	1.44968	0	0	0	1.55139	0	0	6.7801	7.03905	0	4.69207	4.47886	4.38828	0	1.63688	0.100239	4.68825	5.24642	7.28795
mm1311	4.39211	1.53599	0	0.0480097	0.0847333	0	0	0	0	0	0	0.0945293	0.665629	0	0	0.369974	0.344724	5.02832	0.0388237	0	0	0.0250483	0	1.49817	2.18093	0	0	1.5594	4.44446	0	0.21016	0.0298877	0	0	3.74124	0	0	3.07106	0	0	0	0	0.0104502	4.06156	0	0.0102557	0	0	0.0124797
hs641	5.0791	0	0	1.59099	4.26281	0	0	0	0	0	0	4.86328	0	0	0	4.40012	4.23732	0	1.63358	0	0	0	0	0	8.60817	4.56225	4.11295	4.70997	4.40894	4.70997	4.95468	4.38405	12.506	0	10.025	0	0	0	0	0	4.04907	0	0	0	2.31749	4.67985	0	0	6.07141
hs1625	0.0828857	0.09466	0	4.24128	0	0	0.328523	0	1.74239	0	0	0.216665	4.79542	0	0	0	0	0	0.290925	0	0	0	0	0.0124151	0	0	0.0199152	0.0911938	0.0911938	0	0	0	2.18814	0	0	0	0	0	0	0	0	0	3.71754	0	0	0	0	0	0
mm774	0	0.036552	0	0	0.123227	4.0314	3.70438	0	2.39066	0	1.68903	0.0155375	0.0114494	0	0	0	0.261441	0.294331	0	0	4.03483	0	0	0	4.60424	0	0	0	0	0	0	0	0	0	7.50039	3.75394	0	10.7286	0.0505	0	0.0614746	0	0	0.0146758	0	0.547139	0	0	0
mm279	0	0	0	0	0	0	0	0	3.80834	0	0	0.0758001	4.08347	0	4.46312	0	0	0	0	0	0	4.04956	0	0	0	0	0	4.17402	3.534	0	0	0.985617	4.51565	0	4.05766	0	0	7.08517	0	0	0	0	4.27901	0	4.1596	1.82279	0	0	0
hs1211	17.6658	0	0	0	4.55132	0	0	0	0	0	0	0	0	0	0	3.61701	0	0	0	2.35766	0	0	0	4.21896	0	0	4.47045	7.44358	13.9065	0	4.34892	0	0	0.0763481	0	0	0	9.6859	0	0	0	4.13668	0	12.6611	0	0	0	0	4.21264
hs974	0	0	0	0	5.25205	0	3.87424	0	0	0	0	2.59192	4.44249	8.61213	0	0	0	0	0	0	0	0	0	0	0	0	0	0	0	4.47588	5.80924	0	4.02671	0	4.75566	0	1.71899	0	4.12263	0	0	0	0	4.08249	0	4.32231	0	0.480228	0.0318672
hs1228	0	0	0	0	0	0	0	0	4.25537	0	7.13578	4.36351	0	0	0	0	0	0	0	0	0	0	1.30606	0	4.16877	2.30626	0	0	0	0	0	0	0	0	0	0	0	4.54476	0	0	4.01502	0	0	0	0	0	0	0	0
hs240	5.93181	4.21896	0	0	0	0	0	0	0	0	0	0	2.54267	0	0	0	4.5157	0	0	0	4.06601	4.3851	0	0.177289	4.21326	0	0	12.6948	9.11151	0	0	0	0	0	0	0	0	5.07366	0	0	0	0	4.19654	0	0	0	0	0	0.0568391
hs722	7.3098	0	0	0	4.20412	0	0	0	0	0	0	4.32698	0	5.14994	0	0	0	4.10073	0	0	0	0	0	4.32945	0	4.20621	0	0	4.00962	0	0	4.08991	8.07053	0	12.6312	5.171	3.01487	11.1083	10.4554	4.30103	8.90014	8.20287	4.04576	4.54668	0	5.8904	4.20691	10.0701	9.18069
hs1118	0	0	4.42713	0	0	0	0	0	0	0	0	2.95939	0	0	0	0	0	0	0	0	0	0	0	4.95468	0	0	4.26122	0	0	0	0	0	4.45967	0	4.10704	5.72125	9.91703	1.81749	0	0	0.450952	4.05616	0	0	0	0	0	0	0.526181
hs1359	8.95486	4.54956	4.47496	0	0	0	0.799036	0	0	0	5.14989	0	0	4.1798	0	0	0	0	0	0.891969	0	0	0.726254	0.21612	4.84771	0	0	4.05159	4.6517	4.06695	3.97919	2.6792	0	4.02163	4.29057	0.292027	0	4.95861	0	0	4.80688	0	1.78448	4.23582	0	2.00941	0	0	0.994819
hs556	0	0	0	0	0	0	0	0	0	0	0	0	0	0	0	0	0	0	0	0	0	0	0	0	4.34008	0	4.12494	0	0	0	0	0	0	0	0	0	0	0	0	0	0	0	0	0	0	0	0	0	0
hs583	4.30103	0	0	0	3.02411	0	0	0	0	0	0	0	0	0	0	4.11619	14.0566	10.0256	0	0	8.39836	8.81799	0	0	14.2367	0	0	4.86176	4.29246	4.1329	0	4.05948	0	0	0	0	0	4.08188	2.52461	0	2.89	0	0	0	0	0	0	0	0
hs752	0	4.88234	0	0	0	0	0	0	0	0	0	0	4.49485	0	0	0	0	0	0	0	2.52743	2.64505	2.70243	0	3.75383	0	4.02317	4.05306	0	0	3.43378	3.24839	2.31568	0	4.22668	0	0	8.33181	4.26164	0	0	0	0	0	3.28657	0	4.37208	4.37337	4.1831
hs800	0	13.8224	0	0	0	0	0	0	0	4.02549	0	6.78252	0	0	0	0	0	0	0	0	0	0	0	0	8.32445	0	0	8.8878	4.70997	4.40894	0	2.79814	0	0	7.22316	0	0	0	0	0	0	0	0	0	0	0	3.64254	4.27121	3.47484
hs618	0	14.2132	0	0	0	0	0	0	0	2.77454	0	1.77019	0	0	0	4.29757	0	0	0	0	0	0	0	0	0	0	0	4.05306	0	0	3.0034	2.17378	0	0	4.23425	0	0	8.91391	0	0	0	0	4.13018	0	0.138366	0.13747	0	9.36063	11.867
hs304	0	4.15305	0	0	0	0	0	0	9.85057	0	0	0	0	0	0	0	0	0	0	0	0	0	0	0	0	0	4.04915	4.40838	4.08631	6.06247	0	0	0	0	4.30881	4.00612	4.93181	0	0	0	0	0	0	0	0	0	0	0	0
hs1744	0	0.0172058	0	0	0	0	0.0142262	0	0.49326	0	0.0417671	0	0	3.86227	0	0	0.024772	0	0	0	0	0	0	0	0	0	0	0	0	0	0	0	0	0	0.028155	0	0	0.28135	1.72294	0	1.45268	0	0	0	0.118098	0	0	0	2.1813
hs1986	0	0	0	0	0	0	0	0	0	0	0	3.96799	0	0	0	0	0.0952512	0.72965	0	0	0	0	0	0.0143037	0	0	0	3.69464	0	0	0	0	0	0	0	0	0	4.23771	0.43243	0	0	0	0.604125	0	0	0	0	0	0
hs852	9.01536	0	0	0	4.04001	0	0	0	5.13077	0	4.00524	0	0	0	0	0	0.0669273	0	0	0	0	0	0	10.0776	4.15181	0	0	4.87943	5.80688	0	0.759132	0.520191	2.14819	0	1.03901	0	4.48017	0	4.16011	0	0	0	0	4.2993	0	0	0	0	1.41926
hs305	4.38091	0	0	0	4.10237	2.01855	0	0	0	0	0	0	0	0	0	4.39489	0	0	0	2.06868	0	0	0	0	1.93922	0	0	4.15181	4.34582	4.05159	0	0	4.54363	0	0	0	0	0	0	0	0	0	0	4.8962	0	4.19047	0	0	0
mm56	4.35067	9.13293	0.25334	0	0	0	3.27344	0	0.175875	0	0	0	4.48706	0	0.702465	0	1.64184	0.0422198	0.123011	0	0	0	4.33573	4.04934	2.51912	0	0	8.97388	14.1917	12.3211	3.71135	0	0	0	0	0	4.09583	7.27637	0.342561	0	0.333339	0	0	4.05383	0.10774	0	0	0.0758204	0.172488
hs306	0	0	0	0	0	0	0	0	0	0	0	0	0	0	0	0	0	0	0	0	0	0	0	4.03386	4.57433	0	0	0	0	0	4.13374	0	0	0	4.51253	0	0	4.41229	0	0	0.465499	0	0	0	0	0	0	0	0
hs307	4.44855	0	0	0	0	0	0	0	0	0	0	0	0	0	0	0	0	0	0	0	0	9.35971	0	0	0	0	0	4.08566	4.19928	0	4.00789	0	0	0	10.202	0	0	4.04287	4.50065	0	0	4.06449	4.82102	0	0	2.46868	0	8.33457	0
hs529	0	5.31605	0	0	0	0	4.53165	0	0	2.43	0.0151573	0	4.10549	9.73691	0	8.83971	8.95352	4.01286	0	0	2.51725	0	0	4.93554	0	0	0	8.20267	6.5986	0	0	8.42447	4.32698	0	7.11102	0	0	8.42628	0	0	0	0	0	0	0	0	4.39147	4.32239	4.14935
hs308	0	0	0	0	0	0	0	0	0	0	0	0	0	4.03058	0	0	0	0	0	0	0	0	0	0	4.76861	0	0	6.1945	4.11577	4.24109	0	4.19723	0	0	4.63827	0	0	0	0	0	0	0	0	0	0	0	0	0	0
mm371	0.012216	4.14371	0.291308	0	0.205221	0	0.0173006	0	0.0422406	0	0.0988416	9.29831	0.0415794	0.0376978	0	0	0	0	0.0158999	0.0146223	0	0.0175458	0	2.188	0.0364249	0	0	0.0104712	0.0143663	0.0419812	1.31568	1.39591	0	1.25511	1.75439	0.372254	0.0400379	3.27904	4.57233	1.13051	0.934138	0	4.562	0.0643809	0.0453734	0.0238898	0	4.45375	3.5925
mm373	0.217295	1.99884	2.04657	1.73532	2.02833	0.14352	0.016998	0.139348	0.0246635	0.0282984	2.74794	0.126118	1.2591	0.589834	0	0.643649	0.288194	0.444875	0.841767	0.0150984	0.149577	0.457265	0	0.49023	0.0924253	0	2.36739	0	0	0	4.59467	4.71622	3.23168	0	5.94919	1.20056	2.78408	3.14486	1.36629	0	0.0350057	0.0348774	0	0	0.390112	2.48548	0	1.49478	0
mm375	0	0	0	0	0	0	0	0	0	0	0	0	0	0	0	0	0	0	0	0	0	0	0	0	0	0	0	0	0	0	0	0	0	0	0	0	0	0	0	0	0	0	0	0	0	0	0	1.18897	0
mm468	0	0.0730482	0	1.54019	0.0230325	0	3.20967	0	0.0320303	2.32346	0	0	0.0502531	1.24637	0.0150238	3.67784	1.85919	2.9911	0	0	0	0.0329796	0	1.23572	0.118607	0	0	0	0	0	2.21499	0.0392635	0	0	2.55413	2.13768	0.182868	9.34939	0.190941	0	0.163171	0.164129	0.152785	0.0136518	0.037109	0	0.175325	0.197924	0.839735
mm10	0.243329	0	0	0	2.49839	0	1.35076	0	4.01202	0	0	0.506137	0.0144413	0	0	0.893581	0.800793	3.88662	0	0	0	0	5.06752	11.2236	0	0	0.0136147	1.58069	0	0	0.0197914	0	1.75514	0	0	0	0	4.02882	0	0	0	0	0	0	0	0.0937721	0	0.0106276	0
hs1521	0	4.66551	0.0194618	0	0	2.88702	0	3.55189	0	3.28229	0.0720591	3.61324	4.91721	0	0	0	0	0	0	4.04172	1.69386	1.78483	3.40939	0.0971377	4.35887	0	1.94813	0	0	0	0	0	0	0	0	0	1.69165	4.33652	4.13235	0	0	1.79093	2.77809	0	0.0180676	0	2.8557	6.48986	2.86133
mm379	2.08554	1.39327	0	0	0.695007	4.51703	8.24316	3.87682	7.19711	0	0.477635	0.597184	1.55178	3.32306	0.0595108	2.49722	2.89163	4.23682	0	0	4.29243	2.98333	0	2.99385	3.29846	0	7.40569	4.70701	4.40818	4.70701	3.87058	4.56724	4.3706	0	6.14555	0.0732763	0	2.87532	4.77259	0	1.97965	0	0.0306131	2.04991	0.0317864	4.52174	0	6.72452	4.074
mm381	1.49951	0	0	0	0	0	0.964542	0	0	0	0.0995698	1.3555	2.68054	1.04425	1.57206	0	0	0	0	0	0	0	0	4.61446	1.71359	0	0	0.463474	0.528866	0	0.148094	0	0	0	2.0973	0	0	3.07379	0.147065	0	0	3.98366	0	0	0	1.20393	0	0	0
hs1695	1.32037	0	0	0	0	0	0	0	0.12038	0	0	0	0	0.0169455	0	0.22789	0	4.08771	0	0	0	0	0	0	0.147264	0	1.0907	0	1.4043	0	0	0	0	0	0	0	0.0529621	0	4.30036	0	0.0456384	0	0.0436879	0	0	0	0	4.41691	0
mm677	0	0	0	0	4.33967	0	0	0	4.48909	0	0	0	3.46065	0.0510497	0	0.0259414	4.98953	4.191	0	0	0	0	0	0	0	0	0	2.69338	2.9169	2.58168	0.0304988	0	0	0	0	0	0	4.08242	0.0501318	0	0	0	0.229117	0	0	1.95401	0.0549132	0.0677796	4.40392
hs643	8.60015	8.97357	0	0	0	0	4.46597	0	0	0	0	4.51713	0	4.42597	0	0	4.02319	0	0	0	0	0	0	0	4.08513	0	4.25649	0	0	0	0	0	0	0	0	0	0	4.59517	3.95198	0	4.08662	0	4.0048	4.00174	0	0	0	4.20068	8.09327
hs309	4.23433	4.88606	0	0	0	0	0	0	4.46725	0	0	4.37675	4.35634	0	0	0	0	0	0	0	0	0.0965131	0	0	0	0	2.91591	0	0	0	0	4.23011	0	0	0	0	0	7.47662	3.73683	3.74595	3.9331	0	0	4.16941	0	0.0610932	0	0	1.36755
hs1485	0	0	0	0	0.0482092	0	0	0	0	0	0	0.10996	4.08205	4.20343	0	3.94915	0.0195848	0	0	0	0	0	0	0.0261278	0	0	0.0184516	0	0	0	0	0.0835415	0	0	0	0	0	9.93408	0	0	0.172112	0	0	0	0	0	0	0	0
hs1609	0.152804	0	0	0	0.0645167	0	0	0	0.93582	0	0	0.347975	0.0438058	0.0158261	0	0.0357827	0.0355702	0	0	0.249494	0	0	0	0	2.59783	0	0.0214768	0	0	0	0	0	0	0	0.721829	0	0	0	0.0203876	0	0	0	0	0.531487	0.0153684	0	0	0.0196242	0
hs683	0	4.35952	0	0	5.38709	0	0	0	4.91009	4.15058	0	0	0	0	0	0	0	4.03152	0	0	0	0	0	0	0	0	0	4.58336	4.52724	0	0	0	0	0	4.03858	4.13018	0	0.0332541	0	0	8.37683	0	0.0629951	0	0	0	0	0	0
mm1308	4.38256	8.33286	0	0.0153332	0	0	4.00612	0	0	0	6.08406	0	0	4.0011	0	0	4.40671	0	0.012838	0	0	0	0.175265	0.0131752	4.30841	0	4.30452	0.0200538	0.0392304	0	4.48635	0.0173862	0.0143875	0.411903	7.28013	4.71031	3.99651	0.147702	4.37756	0	0.013384	4.60369	0.0919742	0.0229185	1.99705	0.186263	0	3.96063	0.0466744
hs1309	4.17457	8.41676	4.29585	0	0.804467	0	4.85699	0	3.84042	0	5.09637	0	4.11873	0	0	4.15633	0	0	0	0	4.63012	4.94233	0	5.30216	4.21467	0	0	4.16616	0	0	0	0	0	0	4.3279	0	4.36856	3.56111	4.39826	0	3.76789	4.23533	3.63424	4.14997	2.5251	0	3.73578	4.99509	3.59965
hs1484	0.131651	0	0	0	0	0	4.32849	0	0	0	0	0.278527	1.08968	4.58731	0.100473	0	0	0	0	0	0.075389	0.018196	0	4.10878	0.459536	0	0	0.314619	0.314619	0	0	0.0249568	0	0	0	0.0401716	0	8.51146	0	0	3.76967	0	4.40459	0.153877	0	0	0	3.75416	0.659811
hs1450	4.46218	4.65087	0	0	0	0	0	0	0	0	0	0	0	0	0	0	0.621698	0	0	0	0	0	0	14.4221	0	0	0	0	0	0	4.01891	0.0251454	0	4.03433	1.16484	0	0	14.394	0	0	0	0	0.198707	0	0.0413073	0	0	8.37552	0.957672
hs311	8.46033	0	4.15552	0	0	0	0	0	2.97836	0	0	0	0	0	4.04576	0	0	0	4.07935	0	0	0	0	0	4.16431	0	0	0	8.33322	0	3.28243	0	0	0	0.773016	0	0	8.83794	3.05731	0	2.51536	0	3.17334	4.54821	4.01233	3.60217	2.72599	4.39903	2.60816
hs168	4.30364	4.63639	0	0	0	0	0	0	4.67663	0	0	0	0	0	0	0	0	4.23717	0	0	0	0	0	4.15258	4.07883	0	0	0	0	0	0	4.21467	0	0	4.48149	2.65252	0	0	4.37049	0	0	0	0	0	0	0	0	9.04434	0
hs169	4.49757	8.23053	0	0	0	5.25148	4.30134	0	4.47886	4.44112	0	0	0	4.15739	4.52724	4.0942	4.23732	0	0	4.20831	8.1367	0	5.45074	0	8.50314	0	0	0	0	4.16115	2.53203	0	0	0	0	0	0	4.79317	2.357	0	1.96011	2.51254	0	4.8962	4.11227	0	0	2.70612	0
hs764	4.15989	4.34351	0	0	0	0	0	0	0	0	0	0	0	0	0	0	0	0	0	0	0	0	0	4.98716	0	0	0	4.27165	4.13668	0	3.94566	0	0	0	0	4.75817	3.82822	9.14906	0	0	0	0	0	0	0	0	0	0	0
mm1174	0	0	0	0	0	0	0	0	0	0	0	0	0.387145	0	1.08862	0	0	0	0	0	0	0	0	0	0	0	0	0	0	2.51255	0	0	0	0	0.389285	0	0	0	0.185208	0	0.276949	0.01222	0	0	0	0	0	0	0
hs1622	0	0	0	0	0	0	0	0	0	0	0	0	0.323948	0	0	4.03863	3.10248	0	0	0	0	0	0	0.181005	0	0	0	4.58717	3.83302	6.35708	4.21512	4.17119	0	4.03245	0.0108863	0	0	4.15095	0.270163	0	0.305482	0	0	0	0	0	0	0.444929	0.0109604
hs1487	0	4.24185	0	0	0	0.0216247	0.0280148	0	0	0	0	3.7561	0.017335	0	0.149249	0	0	0	0	0	0.0243343	0	0	0	5.13248	0	0	0	0	0	0	0	0	0	0.688619	0	0	8.04813	9.18474	5.27084	4.57025	4.1707	4.20621	0.136667	0	0.370341	0.111651	12.5427	0.189546
mm330	0.0288472	0	0	0	0	0	0.0989206	0	0	0	0	0	0.0205619	0.0760671	0	0.0476916	0	0	0	0.220912	0	0	0	0	0	0	0	0	0.0323032	0.0330315	0.100139	0.136755	0	0	0.17622	0	0	0	1.36761	0	0	0.0115585	0.0967394	0.0288294	0	0	0	0	0.023093
hs200	4.24336	4.37059	2.59429	0	0	0	0.784353	0	0	0	0	4.25493	0	1.76119	4.45842	0	0	0	0	0	0	0	0	0	0	4.15243	4.25259	0	4.19111	0	10.4779	4.00043	8.26179	0	7.05089	0	0	2.07549	0	0	0	0	0	0	0	0	0	0	0
hs197	0.134203	0	4.49621	0	0	0	0	0	0	0	0	0	0	0	0	0	0	4.76556	0	0	4.5052	4.00274	0	0	4.73386	0	0	0	0	4.13549	0	0	0	0	0	0	0.579815	8.40908	0	0	0	4.01909	0	0	0	0	0	0	0
hs194	0	0	5.05552	0	0	0	0	4.18509	0	5.057	4.15101	5.50643	4.29328	0	0	0	4.32148	0	0	0	4.41908	0	0	0	0	0	5.02319	0	0	0	0	4.2768	0	0	4.89279	0	0	4.11295	4.07121	0	4.05263	3.96283	0	0	0	0	0	3.83668	3.8034
hs247	0	5.26841	0	0	0	0	0	0	0	0	0	0	0	0	0	0	2.21094	0	0	0	0	0	0	0	0.408126	0	0	0	4.11634	0	0	0	0	0	0	3.1863	4.46971	0	0	0	0	0	0	0	0	4.08232	0	0	0
hs295	4.17005	0	0	0	0	0	0	0	0	0	0	0	0	0	0	0	0	0	0	0	0	0	0	0	0	0	0	4.70997	8.46101	4.70997	0	0	0	0	1.17997	0	0	0	0	0	0	0	0	4.1152	5.23226	0.969158	0	0	0
hs280	9.70972	4.23958	0	0	4.71741	0	0	0	0	0	0	0	0	0	0	0	5.31753	0	0	0	0	0	0	0	0	0	0	5.65956	4.74473	4.44491	13.8151	12.4924	4.15304	0	11.1229	0	0	5.32927	4.93181	0	4.08035	4.48545	4.19111	4.73993	0	0	4.34008	5.81248	6.9677
hs277	4.44525	4.50576	0	0	0	4.09313	0	0	0	0	0	0	0	0	0	0	0	0	0	6.81657	0	4.07151	0	0	0	0	4.56543	0	4.30025	4.6445	5.27497	0	4.17549	0	4.59013	0	3.67851	0	0	0	0	0	0	4.0925	0	0	0	4.28904	4.59688
hs1857	0	0	0	0	0	0.130117	3.07825	0.146679	0	0.149022	0	2.64456	0	0	0	0	0	0	0	0	0.150899	0	0.170154	6.58062	0	0	0	0	0	0	0	0	0	0	0	0	0	5.21863	4.56731	0	3.35825	0.182228	0.168208	0	0	1.37505	0	5.46112	4.36887
mm165	0	0	0	0	1.79351	0	0	0	6.12083	0	0	0	0	0	0	0	0	0	0	0	0	0	0	0	0	0	0	0	0	0	0	0	0	0	0	0	0	0	4.18909	0	4.28649	3.98161	0	0	0	0	3.47632	4.188	3.54039
mm586	0	0.0234496	0.0389911	0	1.97499	0	0	0	0	0	0	0	0	0	0	0	0	0	0	0	0	0	0	5.52063	0	0	0	0	0	0	0	0	0	0	0.0117043	0	0	0.0242724	0.0613912	0	0	0	0	0	0	0	0	0.0566689	0.369089
hs1674	0	2.93115	8.18051	0	0	0	0	0	0	0.027057	0	0.119595	0	0	0	0	0	0	0	0	0	0	0	0	0.377127	0	0	0	0.35658	0	2.21967	0	0	0	0.107613	0	0	0	4.32387	4.10037	4.04362	0	3.5177	3.47458	0	0.0142118	0	0	4.34852
hs1999	0	1.37707	0	0	0	0	2.11665	0	4.83283	4.57654	0	0.162914	0	0.124484	0	0	0	0.126311	0	0	4.2257	0	0.481469	0	0.07502	0	0	0.0111459	0	0	0	0	0.113486	0	0.0424923	0	0	0	4.07668	0	0	0	0	0	0	0	0	0.268557	2.63291
hs850	4.05453	0	0	0	4.30364	0	0	0	0	4.10568	0	0	4.13077	0	0	0	0	4.03763	0	0	0	0	0	0.508606	0	0	1.31769	0	0	0	3.63085	0.374288	0.048836	0	3.80444	0	0	4.27426	0.0504537	0	0.0501884	0.0379193	0	4.07058	0	0	0	0.0459458	0
hs1139	5.18279	4.77441	0	0	0	0	0	0	0	0	4.16718	2.17806	0	0	0	0	0	0	0	0	0	0	4.48678	1.09724	0	4.23602	0	4.0765	7.37975	4.44491	2.36804	1.2786	2.32481	0	0	0	0	4.86438	2.5867	1.20925	1.57196	0	0	12.2505	0	0.0226752	0	0.913375	1.17979
hs1031	4.41567	6.18103	0	0	0.119013	0	4.12436	0	0	0	4.77405	0	3.58856	0	0	0	0	0	0	0	0	0	0	0	0	0	4.26215	8.07616	10.0405	4.42366	3.93728	4.05035	0	0	4.58374	0	0	9.93706	3.69549	0	7.63721	2.1822	0	0	0	0.0550284	4.23049	7.10159	7.5558
hs1546	9.88097	0.0124322	0	0	0.0477378	0	0	0	0	0.0184431	0	0	0.224011	0	0.0134779	0	0	0	0	0	0	3.95345	0.0114236	0.0435236	0	0	0	8.15205	13.9566	5.12767	3.69977	4.2228	0	0	0.0689025	0	0	0	3.13873	0.048802	2.96356	2.99294	2.94868	13.0184	0	0.0102014	0	3.35851	0
hs1045	4.07058	4.32148	0	0	1.98031	0	0	0	0.0223284	0	4.21324	0	0	0	4.43533	4.05208	0	0	0	0	0	0	0	0.17467	4.25581	0	0	4.75203	4.75203	4.2652	0	2.40106	0	0	1.52187	0	0	4.91858	0	0	0	0	0	0	0	2.9901	0	0	0
hs270	8.36249	5.59288	0	0	0.977102	0	0	0	0	4.00018	0	4.21538	0	0	0	0	0	0	0	0	0	0	0	0	0	0	0	4.08566	4.19928	0	0	0	3.59483	0	8.3687	4.31501	3.45682	0	0	0	0	0	0	5.18243	0	0	0	0	0
hs1098	9.32551	12.8323	0	0	0	0	4.36754	0	0	0	0	0	0.0106677	0	0	0	4.09151	0	0	0	0	0	0	3.29434	0	0	4.9501	0	0	0	0	0	0	0	0	0	0	0	0	0	0	0	0	5.23359	0	0	0	0	0
hs1008	4.08302	8.76049	0	0	0	0	4.47763	0	0	0	0	0	0	0	0	0	4.34486	0	0	0	0	4.92812	0	0	4.08938	0	0	4.51286	4.56384	5.86012	0	0	0	0	0.0734578	0	0	3.9476	0	0	0.205231	0	4.59007	4.25964	0.0256687	0	0	0.977129	1.43519
hs2088	6.90617	4.8729	0	0.0303515	0	0	0.028761	0	0	0.882268	0.0185229	0.162695	0	0	0	0.0729353	0	0	0	0	0.853214	0.0264927	0	0	0.0415968	0	0	4.19382	4.0942	0	0	0	0.0121115	0	0	0	0	0.0243052	1.32503	0	0.0107525	0	0.0105822	4.88912	0.0697999	0.194265	0	0.643925	0.0414629
hs1001	4.1549	0.0148717	0	0	0	0	0	0	0	0	0.131915	4.95466	0	0.0308002	0	1.08576	0	0.352142	0	0	0	0	0	0	4.44612	0	0	4.34486	4.14388	0	0	0	0	0	4.17849	0	0	0.213604	0	0	0	4.14752	0	0	0	0	0	4.06651	0
hs790	0	8.51988	0	0	4.36706	8.28152	4.40782	4.02595	0	4.19518	4.14997	0	4.42713	0	0	4.50307	4.16813	4.42251	0	0	0	4.07913	4.16685	0	0	0	0	0	0	4.43297	0	0	0	0	4.11634	0	1.1899	0	4.03152	0	0	0	0	0	0	0	0	4.05355	0
hs1179	0	0	0	0	4.03152	0	0	0	0	0	0	4.5881	0	0	0	0	0	0	0	0	0	0	0	1.81339	0	0	4.97469	5.48017	4.04335	4.15552	0	3.92107	0	0	0	0	0	4.71811	0.101311	0	0	0	0	0	0	0	0	0.142055	0.200126
hs1124	0	0	0	0	0	0	0	0	0	0	8.17959	0.273481	0.961483	0.0122267	0	0	0	0	0	2.0072	0	0	0	2.63497	3.76069	0	0	0	0	0	5.21359	4.03129	0	0	0	0	2.62702	0	0	0	4.48092	0	0	0	0	0.150185	0	0.0214595	4.7986
hs238	4.41567	13.2399	0	0	0	0	4.05012	4.03905	0	0	0	0	11.7512	4.09474	4.43063	0	0	0	0	1.83474	0	4.0348	0	0	7.54609	0	2.16293	5.79479	8.33674	4.10491	4.03105	0	0	0	1.77717	0	0	0.0879588	0.28101	0	0.282336	1.34809	2.36176	8.3412	0	0	0	3.40794	7.15874
hs1105	6.17393	6.91364	0	0	2.7822	0	0	0	3.92182	0	8.49486	0	6.52091	0	0	0	0	0	0	0	0	0	0	0.177268	5.90687	0	0	4.60906	5.02826	8.86104	4.11077	4.41005	4.06753	0	4.36856	0	0.0190748	6.89644	0.0445307	0	0	0	0	12.3227	0	0	0	0.0822579	0
hs1388	0	0.032091	0	0	4.57792	0	0	0	0.949954	0	0	0	4.36457	0	0	0	0	0	0	0	0	0	0	0.133533	0	0	0	0	0	0	0	4.17903	4.44977	0	4.57195	4.23284	4.19723	19.6049	0.478526	0	0	0	0	0	0	1.95667	0	3.67935	1.86868
hs917	0	7.06827	0	0	0	0	0	0	0	0	0	0	9.28324	0.0121985	0	0	0	0	0	0	0	0	0	0	0	0	8.8069	0	0	0	4.67095	4.06067	3.99986	4.00488	0.0515572	0	4.70457	0.0295682	0	0	4.60519	0	0	0	0	1.54928	0	0	3.55469
hs645	0	4.45143	0	0	0	0	0	0	0	0	0	0	4.66154	0	0	0	0	0	0	0	0	0	0	0	0	0	0	0	0	0	0	0	0	0	0	0	0	2.91379	4.1671	0	0	0	0	0	0	0	0	4.49992	0
mm1297	4.34644	4.73702	0	0	0	0	0	0	0.0183041	0	0	1.20411	0	0	4.60004	0.106688	0.220235	0	0	0	0	0	0	0	0	0	0.0557785	0	0	0	0	0	0	0	0	0	0	4.4721	3.21179	0	0	0	0	0	0	1.59195	0	0	0.039562
mm1387	0	3.03994	0	0	3.1063	0	0	0	0.71086	0	0.272474	3.27724	0.484413	0	0	0	0.0420551	0.0509971	1.3753	0	0	0	0	2.85221	0	0	0	0.143577	0	1.3607	0.577646	0	0.566081	0	0.152501	0	0	3.36698	0.0670244	0	0	0	0.0451503	1.62341	0	0.168229	0	0.668891	0
mm80	3.53985	2.36264	0	0	2.30012	3.44741	4.51121	3.51663	5.76297	3.71989	0	0.634358	2.99013	0	0	0	1.8791	0	3.63261	4.35317	3.81184	4.24197	5.60479	0	0	0	0.0258715	7.51214	6.87656	3.46507	0.152971	1.43076	0.160244	0	0.977498	0.0187866	0	0.0628733	0.0191592	0	0.021088	0	0	3.33877	4.89896	1.00715	0	0.176011	0.032543
mm334	0	3.49584	0	0	3.49884	0	4.22278	4.20481	4.20572	0	0	7.51354	9.07198	0.0583008	3.77846	0	0	0	0	8.27645	0	0	3.88062	7.77975	4.31233	0	0	0	0	4.45812	0	4.14163	0	0	4.97153	0	0	4.05404	4.0331	0	0	0	0	4.23293	0	0	0	4.29299	1.05798
hs569	4.16178	7.09676	4.15058	1.56318	0	0	0	0	4.1606	0	0	0	5.03668	4.70774	0	0	0	0	0	5.33348	5.20517	5.82797	0	0	4.97869	0	0	0	4.2233	0	0	0	0	0	0	0	0	4.0131	4.39511	0	1.48575	3.63409	3.25633	8.55043	5.47522	4.15243	3.49275	9.24103	3.69152
hs2043	0	0	7.62836	0	0	0	0	0	3.50771	0	0.133547	0.229763	0	0	0	4.52425	5.05234	0	0	0	0	0.0630782	0	0	0	0	0	0	0	0	1.62438	0	2.16687	0	2.13849	0.0321388	0.0387657	1.58859	4.07102	0	0	0	0.877634	0	0	0	0	4.60385	0
mm23	0	0	0	0	0	0.295185	0	0	0	0.315532	1.12833	0	0	0	0	0	0	0	0	0	0	0	0	4.24907	0	0	0	0	0	0	0	0	0	0	4.77469	0	0	0.0705122	0.0373416	0	0	0	0	0	0	0	0	8.17955	0
mm1332	0	3.06769	0	0	0.535382	0	0	0	0	0	3.16017	0.089181	2.56685	0.151699	1.01585	0	0	0.339576	0	0	0	0	0	0.0460368	0	0	0	0	0	0	1.77558	1.49942	0	0	4.70458	0.462748	0.50868	0.41288	2.49704	0	0	0	0	0	0	3.18466	0	0.0262411	1.72992
hs1702	6.21053	6.16124	4.01303	0	0	0	0	0	0	0	0	0	1.49853	0	1.23797	0	0	0	0	0	0	0	0	3.92374	0.0729213	0	0	0.0632831	0.051575	0.0445357	8.44438	6.70205	4.53772	0	4.93616	0.591681	0.0559014	3.76184	0.115671	0	0	0	0	0.07667	0	0.74504	0	0.0762051	0
mm484	9.71049	4.1209	0	0	0	0	0	0	0.0499702	0	0	0	0	0	4.26055	0	0	0	0	0	0	0	0	0	4.4318	0	0	4.0804	5.18642	0	0	0	0	0	0	0	0	3.50616	0	0	0	0	0	9.0473	0	0.0165242	0	0.0942505	1.23825
mm8	3.60916	3.0906	0.0470163	0	0	0	0	0	0	0	0	3.47626	0	0	0	0	0	0	0	0	0	0	0	0	0	0	0.972514	3.70943	4.29752	3.87588	0	0.0322369	0	0	0.0189675	0	0	0	0	0	0.4345	0	0	4.52952	0	0	0	1.32831	0.0156531
mm316	4.62555	0.0151591	0	0	0	0	0	0	0	0	0	0	0.0210917	4.08092	0	0	0	0	0	0	0	0	0	0	0	0	0	4.17769	4.11106	4.61668	0	0.843595	0.0184086	0	0	0	0	0	0	0	0	0	0	4.0971	0	4.62961	0	0.0158178	0
hs2124	0.0830049	0.148494	0	0	0	0	0.0174258	0	0.0649903	0	0	0.0595114	0	0	0	0.0119639	0	0	0	0	2.639	0	0	0.0469014	0	0	0	0	0	0	0	0	2.70311	0	0.119655	0.0893622	0.0973636	1.10136	0.208873	0	0.175586	1.43826	0	0.0845719	0	0.0198439	0	2.29539	0
hs241	8.75051	13.0506	0	0	0	0	4.06242	0	5.11407	0	0	0	1.4514	0	4.13966	4.0942	0	0	0	0	0	0	0	3.55158	4.14569	0	0	0	0	0	2.02712	0.383045	2.62816	0	2.86042	4.75135	4.84083	4.74147	5.4828	0	4.64782	0	0	0	0	0	0	5.58336	7.32117
hs417	0	0	0	0	0	0	0	0	0	0	0	0	0	0	0	0	0	0	0	0	0	0	0	0	4.60155	0	0	0	0	0	0	5.20876	0	0	4.67778	4.11691	0	4.82681	0	0	0	0	0	0	0	0	0	0	0
hs408	0	0	0	0	0	0	0	0	0	0	0	0	5.57675	0	0	0	0	0	0	0	0	0	0	0	0	0	0	4.91721	4.48812	0	0	0	0.0860807	0	4.26418	0	0	0	0	0	0	0	0.0929983	8.81211	0	0	0	0	0
hs2094	22.1427	16.5377	0	0	0.0414053	0	5.29499	0	0.367974	1.71348	9.62853	9.06334	11.4778	0	0	4.66354	0	0	0	0.364786	0	0.889269	0	4.00745	5.13966	0	0	9.84356	9.10909	4.55129	0.02532	8.60031	0.0259787	0	4.33819	0	0	0.156798	6.74349	0	4.70225	4.01592	0.155351	8.4419	1.23417	2.02098	0	4.3187	0
hs389	4.15304	0	0	0	4.24718	0	0	0	0	0	4.13549	0	10.5951	0	0	0	0	0	0	4.21538	0	0	0	0	0	0	0	8.65997	8.67467	4.02457	0	0	0	0	0	0	0	0	0	0	0	0	0	0	0	0	0	0	0
hs361	23.8834	10.1153	0.257679	0	4.21116	0	4.01228	0	0	0	0	0	0	0	0	0	0	0	0	0	0	0	0	0	0	0	9.89967	0	4.44491	0	0	5.76003	0.0305105	0	4.13732	0	0	0	0	0	1.18006	0	0	5.8041	0	3.65744	0	0	0
hs289	4.41794	13.9756	0	0	4.98935	0	0	0	0	0	5.22475	0	4.41454	0	0	0	0	0	0	0	0	7.44406	0	0	0	0	0	0	0	4.13371	0	4.14935	0	0	4.08301	0	0	0	0	0	0	0	0	4.35848	0	0	0	0	0
hs677	0	0	0	0	8.15153	0	0	0	4.15802	0	4.75945	0	0	0	0	0	0	0	0	0	0	0	0	0	0	0	0	0	0	0	4.02118	4.30049	0	0	4.34344	4.14146	0	0	3.83394	0	3.57406	3.74905	3.79533	0	4.37161	0	3.86773	6.15808	3.87077
hs1615	4.16207	7.79403	0.0243344	0	0	0	0	0	0	0	0	0	0.186672	0	4.99571	0	0	0	0	0	0	0	0	0	0.810094	0	0	10.3004	8.81951	8.69716	0.537955	0.534682	0.60619	0	0.861843	0.0203667	0	0	0.0106704	0	0	0	4.01046	8.33211	0	0	0	5.89927	2.72361
hs1833	4.04236	0.0247458	0	0	0.0345754	0	0	0	0	0	0	0.0259205	0	0	0	0	0	0.0582065	0	0	0	0	0	0	0	0	0.0496907	4.26047	4.07749	0	0	0	0	0	2.23026	0	0	0	0	0	0	0	0	0	0	0	0	2.79707	3.79774
hs1912	5.74473	7.7122	0.273722	0	0	4.14421	4.31822	4.89059	0	4.76946	5.79317	0.0413776	0.64253	0	0	0	0	0	0	4.13446	9.90956	7.12357	4.43197	0.336291	4.8729	0	0	4.75203	4.91364	4.45842	3.53329	1.09784	4.11839	0	0.177092	0	0	0.0179499	2.79635	0	0	0	0	5.77211	8.44677	3.98178	0	2.7988	0
hs705	8.49087	1.05466	0	0	0	0	0	0	0	0	8.24474	0	0	0	0	0	0	0	0	0	2.6343	2.57445	0	4.28651	0	0	0	0	5.88273	0	0	0	0	0	0	0	0	0	0	0	0	0	0	4.38405	0	0	0	0	0
mm1088	14.4726	6.58038	0	0	0	0	0	0	0	0	8.56377	4.26041	0	0	4.76917	4.66959	4.55525	0	0	0	0	0	0	0	0.0280579	0	0	15.7553	17.3377	12.9856	0	0	0	0	0	0	0	0	0	0	0	0	0	9.07532	0	0.0685264	0	0	0
mm318	0	0	0	0	0	6.14114	5.53462	6.12819	0.0107884	5.63291	0	3.43669	0	0	0	0	0	0	0	5.39674	6.13417	0	6.37063	0	0	0	0	0	0	0	4.24335	0	0	0	0	0	0	0	0.409723	0	0	4.31069	4.03905	0	0	0	0	4.07181	0.0206418
hs1631	0.0497041	0.0864989	0.0272894	0	0.351418	0.0233992	0.0237058	0	0	0	0	0	0	0	0	0	0	0	0	0.0265369	0	0.0285493	0	0.155307	0.0201529	0	0.0238565	0.0516765	0.0516765	0	4.12148	4.37786	0.192159	0	4.93181	0	0	0.0379098	0.118209	0.0152548	0.0141568	0.0139202	0	0	0	4.11721	0	4.37795	0.145957
hs1633	0	0.0149742	0	0	0	0	0	0	0	0.0301748	0	0	0	0	0	0.812906	0	0	0	0	0	0	0	0.0868667	0.101188	0	4.99548	0	0	0	0	2.05054	1.42508	0	0.0791794	0	0.0129162	0.0280487	2.71516	0	2.88386	1.89609	0	0	0	0.0117595	0	3.5409	3.47158
hs1627	0.16892	1.91497	0.0928973	0.059752	3.20099	0	0	0	4.14781	0	0	4.36829	4.03958	4.4699	3.44941	4.04624	0.873171	4.32889	0	0	0	0.0355283	0	13.0438	4.03424	0.0867883	3.93336	4.40671	8.18569	4.50577	5.12742	4.37572	5.09424	0.279271	12.99	5.07007	0.236299	4.02919	0.0777872	0	2.10036	0	4.59686	4.53774	0.422594	4.07197	3.88427	5.18124	4.209
mm49	0.521179	0	1.65273	4.24753	0.101745	0	0	0	0	0	0	0	0	0	0	0	0	0.725144	0.0417963	0	0	0	0.847155	0.0492735	3.89449	0	2.9663	0.207246	0.0123876	0	0.0450416	0.192399	0	0	0.252952	0	0.107657	0.206186	4.13967	0	0	0	0	0.0115951	0.0640695	0	0	0.160653	0
mm832	0	1.40724	0	0	0	0	0.0101159	0	0	4.29567	0	4.0055	0	1.71698	0	0	0	4.33878	0	0	4.58375	0	4.68403	0	0.058894	0	0	0	0	0	4.12462	0	0	0	0	0	0	9.3253	0	0	0	3.97606	4.33161	0.0159901	0	0.622988	0	4.82819	0
hs2419	0	0	1.60723	0	1.68603	0	1.49948	0	0	0	0	0	0	0	0	0.0148428	0	0	0	0	0	0	0	0.756063	0.0116202	0	0	0	0	0	0.0163267	4.25409	0	0.0176051	0.0615026	0	0	0	0	0	0	0	0	0	0	0	0	0	0
mm43	0	0	0.0276877	0	0	0	1.12853	0	0.0216668	0	0.989756	0.220825	0	0	2.52333	0	0.0127958	0.0275221	0	0.032014	0	0	0	0.020675	0.0163474	0	0	0.0439935	0	0	0.0960595	0.574877	0.179077	0	1.05214	0	0	0.0219547	0.506304	0.565907	0.462414	0.614806	0.609078	0.0190745	0	0.028111	0.595037	0.623028	0.577952
mm389	0	3.86232	0	0	0	0	0.0176283	0	0.199056	0	0	0.0290881	0.161679	0	0	0.0198506	0.0163049	0	0	0	0	0.0391019	0	0	0	0	0	0	0.191365	0	0	0	0.0165634	0	0.0408583	0	0	0.31075	0.0466311	0	0.15644	0	0.0266772	0.195812	0	0	0	0.27788	0.0237092
mm390	0	0	1.72874	0	0.0495467	0	0	0	0.0412326	0	0	0	0.511205	1.63605	0.0112701	0	0	0	0	1.14399	0	0	0	0	0.0706259	0	0	0	0	0	0	0	0	0	0.0413479	0	0	4.66692	3.59296	0	0	0	0	0	0	0	0	0	0
mm391	0	0	0	0	0.808117	0	0	0	0	0	0	0.900579	0	0.105923	0.0966804	0	0	1.84534	0	0.023406	0	0	0	2.98828	0	0	0	3.18534	2.67922	0	3.97128	0	0	0	4.5695	0	0	3.65909	4.29284	0	0	4.0224	4.03922	2.35644	0	0.607782	0	5.14916	0
hs1908	3.46113	3.20918	6.38534	0	0	0	0.232883	0	0	0	4.13802	0.0144925	6.87599	0	0	0	0.0565573	0	0	0	0	0.366957	0	5.46921	0.315081	0	0	0	0.0284243	0.0193194	0	0.0607607	0	0	0.100862	0	0.0403264	4.83964	0	0	0.0570134	0	1.01547	4.4774	0	6.97458	0	0	0
mm394	0	0	0	0	0	0	1.35441	0	0	0	0	1.35674	0	0	0	1.63659	0.0166095	0	0	0	0	0	0	0	0	0	0	0	0	0	0.0132606	0	0.0130203	0	4.67217	0	0	0	0	0	2.38738	0	0	0	0	0	0	0	0
hs2198	0.0566496	0.0348354	0	0	0	0	0.0245908	0	0	0	0	5.42181	0	0.809461	0	3.72824	4.60512	0	0	0	0.0153101	0.0155224	0	0	0.0186384	0	0	0.0673747	0.0452881	0	0	0.0237576	0	0	0.0330227	0	0	0	0.0176322	0	0.123041	0	0	0.0358024	0	0.0209206	0	0	0
hs2200	0	1.54802	0	0	0	0	0	0	0.0151272	0	1.15724	0	0.0200005	0	0	0	0	0	0	0	0	0	0	5.40987	0	0	0	0	0	0	0.0919067	0.0934668	0.0278068	0	0.0607453	0	4.27438	0.651955	0	0	0	0	0.37676	0	0	0	0	0	0.0251908
hs1418	9.21587	16.052	0	0	4.56459	0	4.23284	0	3.00699	4.19382	0	0	0.0153608	0	0	0	4.73721	0	0	0	4.39362	0	4.77211	0	0	0	0.974311	0	4.2204	0	4.19849	3.69318	4.11134	0	0	7.7818	0	0	4.04672	0	4.54821	4.17393	0	8.24252	0	0	0	0	0
hs1268	0	4.72683	0	0	4.89685	0	0	0	0	0	0	4.53887	0	0	0	0	0	0	0	0	0	0	4.15864	0	4.03103	0	0	0	0	0	4.48413	0	4.21824	4.61618	0	0	0	4.19273	3.2466	0	2.82526	2.80246	0	0	0	0	0	2.94334	2.8149
hs1885	1.53873	2.06484	0	0	0.238561	0	0.0326668	0	0	0	0	0	0.14165	0	0	0	0	0	0	0.0356228	0	0	0	0	0.0173366	0.0239262	0.0280371	0	0.0166352	1.31603	0	0.0794442	0	0	0.050138	0	0	0	0.013938	0	0.0633461	0	0	3.56094	0	0	0	0.010237	1.6734
mm135	0	0.368412	5.0321	0	0	0	0	0	0	0	0	4.26013	0	0.0304576	4.17108	0	0	0	0	0	0	0	0	0	0	0	0	0	0	0	0.0174439	0	0.0153062	0	0	0	0	1.04172	4.88341	3.98728	0	2.8306	0	0	4.35169	0	0	4.65064	4.22283
hs526	0	0	0	0	0	0	0	0	0	0	0	0	0	0	0	0	4.18047	0	0	0	0	0	0	0.0125814	4.39192	0	0	0	0	0	4.38226	0	0	0	0	0	0	0	0	4.01954	0	0	0	0	0	0	0	0	0
mm425	0	0	0	0	0	0	0	0	0	0	0	0	0	0	0	3.51819	0	0	0	0	0	0	0	0	0	0	0	4.57218	4.30576	4.2041	0.0139251	0	0	0	0	0	0	0	0.029189	0	0.0232869	0	0	0	0	0	0	0.0340788	0
mm426	4.29073	4.77813	0	0	0.0127511	0	0	0	0	0	0	5.5374	4.35067	0	0.0185056	4.11808	0	4.18674	0	0	0	0	0	3.7885	0.0520764	0.0311041	0	9.34027	5.82102	5.49859	8.33853	6.05437	4.97843	0.222497	4.00184	0.521349	0.526023	5.21238	0.954815	0	4.44129	4.48681	0.229783	9.16576	0	2.27679	0	0.0102446	0
hs171	10.35	9.29714	0	0	0	0	0	0	0	0	8.48851	0	0	0	0	0	0	0	0	0	0	0	0	0.245909	4.15158	0	0	0	2.82517	0	0.142829	0	0.244062	0	1.77955	0	0	5.52837	0	0	0	0	0	4.38164	3.231	0	0	0	4.46909
mm427	8.98519	10.2584	0	0	0	0	0	0	0	0	3.95796	0	0.652107	0	0.251225	0	0	0	4.04207	0	0	0	0	0	0.0715911	0.0411239	0	0	0	0	0	0	0	0	0	0	0	4.088	0	0	0	0	0.179939	0	4.57182	0.14557	0	0	0
mm428	3.30033	3.00649	1.22843	0	0	0	0	0	0	0	0	0	0	0	4.79528	0	0	0	0	0	0	0	0	3.71273	0	0	0	4.84771	4.56225	0	8.18079	1.20798	4.24642	0	5.94077	0	0	0.376808	4	0	0	3.00907	0	3.66659	0	0	0	4.57349	0
mm429	12.861	8.99757	0	0	0	0	0	0	0.328956	0	0	0	0	2.85953	8.93116	0	0	0	4.43435	0	0	0	0	4.21472	0	0	4.08136	4.50646	8.0466	0	0.0503913	0.0739096	0	0	0.355424	0	0	0	3.00845	0	0	0	0	0	0.0327594	0	0	4.1289	0
hs746	0	8.87923	4.94041	0	4.09598	0	0	0	0.142331	0	0	4.77886	4.83801	0	0	0	0	0	0	0	0	0	0	1.79975	4.11014	0	0	0	0	0	0.183574	0	5.86081	4.0245	0	0	0	8.86432	0	0	3.45728	4.07629	0	0	0	0	0	0	0
mm928	4.011	0	0	0	0.0910858	0	0	0	4.07007	0	0	2.42773	4.40121	0.146553	0	0	0	0	3.44087	0	0	0	0	0	0	1.07907	4.15992	0.020228	0	0	0	0.0778596	0	0	1.83024	3.03175	3.24413	5.80605	0	0	0	4.06098	0	0	0	0	0	0	0.101023
hs2303	0	0	0	0	0	0	0	0	0	0	3.21864	0	0	0	0	0	0.010889	0	0	0	0	0	0	0	0	0	0.011396	0	0	0	0	0	0	0	0	0	0	0	0	0	0	0	0	0	0	0	0	0	0
mm253	0	0	0.292087	0	0	0	0	0	0	0	0	0	0	0.544279	0	0	0	0	0	0	0	0	0	0	0	0	0	0	0	0	0	0	0	0	0	0	0	0	0.416279	0	0.392988	0.381085	0.380084	0	0	0	0	0.370976	0.383467
hs1248	0	4.25493	0	0	3.97917	0	0	0	0	0	0	0	0	4.00174	0	0	0	4.29282	0	0	0	0	0	8.96642	3.8958	0	0	0	0	0	4.1296	10.327	9.07679	0	8.00439	4.06702	0.0106276	8.03008	0	0	0	0	2.87583	0	0	0	0	0	0
hs1249	0	0	0	0	0	0	0	0	4.88957	0	4.04479	1.32803	2.03551	0	0	0	0	0.0125172	0	0	0	0	0	0	0.0136909	0	0	0	0	0	0	0	0	0	2.65262	0.203302	3.17251	1.4186	2.0552	0	0	0	0	0	0	0	0	2.24399	1.73081
hs259	0	0	1.46641	0	0	4.63639	4.4389	4.42022	0	5.33068	0	0	4.36251	0.357854	0	4.08672	0	0	0	4.03198	5.21042	0	4.35458	0	0	0	0	0	4.73518	0	0	0	0	0	0	0	0	7.78743	4.54975	0	4.15989	0	4.09963	4.42022	0	0	4.08513	4.62893	5.04528
hs1250	0	0	0	0	0	0	3.39666	0	0	0	0	0	0	0	0	0	0	0	5.25181	0	0	2.68565	0	1.65991	4.21824	0	0	0	0	0	3.85606	0.187191	0.2211	0	3.709	0.268733	4.60715	0	0	0	0	0	0	0	0.0252795	1.25814	0	0	0.780559
hs916	0	0	0	0	4.21824	0	0	0	0	0	0	7.92066	10.9219	0	4.28176	0	0	0	0	0	0	0	0	4.10182	0	0	0	0	0	0	0	0	0	0	0	0	0	4.16475	2.66993	0	2.60285	0	0	0	0	0	0	0	4.14327
hs842	0	0	5.22768	0	0.620655	4.24109	4.02273	4.34872	0	4.38091	3.37626	0.420072	0	0	0	0	0	0	0	0	4.14086	0	4.89963	0	4.33768	0	0	4.12033	5.12559	0.870044	4.04721	4.18243	4.13312	0	5.73518	0	0	8.41236	0	0	0	0	0.0264498	0	0	0.24555	0	0	0
hs2346	0	0	0	0	0	0	0	0	0	4.05733	0	3.08919	0	0	2.72991	0	0	0	0	0	0	0	0	0	0	4.11968	0	3.75889	0	0	2.6554	0.0327095	6.57305	0	3.15143	0	0	6.00752	1.23997	0	1.47049	0	0	0	2.91359	0	0	6.96855	0.256387
hs601	0	0	4.96658	0	0	0	0	0	0	0.0289509	4.75913	0	0	0.0209645	0	0	4.15181	0	4.38397	0.0366899	4.01355	0.0365077	0	4.12828	0	0	0	0	0	0	0	0	0	0	0.282831	0	0	4.51004	0	0	0	0	0	0	5.06305	0	0	0	0
hs847	0	0	0	0	5.17783	0	0	0	4.37882	0	9.65278	0	0	0	4.065	0	0	4.31785	0	0	4.23882	4.67572	0	5.08566	0	0	4.4045	0	0	0	0	0	0	0	0	0	0	0	0	0	0	0	0.0254674	4.14448	0	0	0	8.98686	0
hs2414	0	3.66793	0	0	0	0	0	0	0.0318429	0	0.0449659	0	1.05025	0.0390318	0	0	0	0	0	0.0916392	0	0	0.0715002	0.0163362	0	0	0	0	0	0.485724	0	0	0	0	0	0	0	4.42433	0	0	0	0	0	0	0.977631	0	0	0	0
hs1509	0	0.129788	0	0	3.64312	3.80982	0	0	0.0511985	0	0	0	0	0	0	0	0	0	0	0	5.13462	5.56972	0	2.34448	0.359224	0.252158	0.853903	0.0501876	0.0501876	0.0490167	0.584724	0	0	0	1.78649	0	0	0	0.0488758	0	0	0.428404	0	0.0334664	0.151013	0.148819	0	0.0435313	0
hs1668	0	0	0	0	0.0720083	0	0.0258873	0	0.0167669	0	0	0	0	0	0	0	0.0143433	3.88356	0	0	0	0	0	0.251162	2.8986	0.0465418	0.385875	0	0	0	0	0	0	0	0	0	0	0.0308471	4.53785	0	4.37002	4.4933	4.18168	0	0	0	4.29851	5.1492	4.32473
hs1460	0	1.293	4.16772	0	1.22924	0	0	0	4.09992	0	0	4.54426	0	2.99362	2.34105	0	0	0	0.0254412	0	0.0227554	2.27116	0	5.32872	0.191882	0	0.3258	0	7.81627	0	3.31594	1.34048	1.52806	0	0.912187	0	2.86419	1.44886	0	0	0.144355	0.135308	0	2.95977	0	0.0413346	3.94511	4.12458	0.0151328
hs687	0	0	0	0	0	0	1.69894	0	0	0.174602	0	0	0	0	0	0	0	4.51004	0	0	0	0	0	0	4.49621	0	0	0	0	0	0	0	0	0	0	0	0	0.0323182	0	0	0	0	0	0	4.38195	0	0	0	0.0166846
hs678	0	2.71505	0	0	0	0	0	4.33913	0	4.07935	0	0	1.04611	0	0	4.04048	4.57187	0	0	4.28316	0	0	0	0	4.04479	0	0	4.33442	4.77989	5.06905	2.15949	0	2.02884	0	6.99708	0	0	0	0	0	0	0	0	0	0	0	0	4.14509	0
hs1651	0	0.46265	0.0153642	0	3.1803	3.89139	3.88688	0	0.0569719	0	0	0	0	0.0679632	0	0.147501	0	0	0.0259807	4.22679	0	0	3.89175	3.19039	0.0263919	0	0	0	0	0	2.73263	0.0179071	0	0	3.07224	0.0411342	0.041463	5.6679	0.491116	0	0	0	3.4665	0	0	0	0	0.0279076	3.2635
mm770	0	0.194466	0	0	0	0	0.587859	0	0	0	0	0	0.0130243	0	0	0	0	1.06525	0.019315	0	0	0	0	1.75155	0	0	0	0	0	0	0	0	0.0210902	0	0	0	0	0	0.032152	0.0338452	0	0	0	0.797518	0.0167363	0.0217117	0	0.549833	0.247575
mm1340	0.0185544	2.8711	0	1.36082	0.0178386	0	0	0	0.0973213	0	0	0.058035	0	1.00781	0	0	0	0	0	0	0	0	0	2.97736	0.113225	0	0	0	0	0	0.0110944	4.2767	0	0	0	0.0114207	0.0542399	0.857111	1.50666	0.113966	1.16943	1.41276	0.650361	4.03105	1.41793	2.01626	0.0800343	0.668334	0.698444
mm34	0	0.695527	0	0	0	0	0	0	0	0	0	0.026822	0	0.0225465	0	0.045801	0	2.47079	0	0	0.053046	0.0570222	0	0	0	0	0	0.0155725	0	0	0.350691	0	0.339998	0	0	0	1.35511	1.01538	0	0	0	0.0236834	0	0	0.0505269	0	0	0	0.0148838
hs840	0	0.542454	0	0	0	0	0	0	2.63789	0	0	0	0	4.26043	0	0	0	0	0	0	0	0	0	0	0	0	4.70115	0	0	0	0	0	0	0.0111483	0	0	0	7.18668	4.02091	0	4.12321	0	4.03905	0	0	0	4.06248	4.21325	4.06399
mm187	0	0	0	0	0.0334573	0	0	0	0	0	0	0.964561	0	0	0	0	0	0	0	0	0	0	0	0	0.023795	0	0	0	0	0	0	0	0	0	0	0	0	0.0364752	0	0	0	0	0	0	0	0	0	0	0
mm397	0	0	0	0	0	0	0	0	0	0	0	0	0	0	0	0	0	0	0	0	1.67868	0	0	0.194546	0	0	0	0	0	0	0	0	0	0	0	4.59865	5.31797	3.88774	0	0	1.08958	0	0	0	0	0	0.0175008	0.0302948	0.0188333
mm39	0	2.07795	0	0	0.203328	0	2.10686	0	0.202728	1.5315	0	0	0	0	0.0743502	0	0	0	0	2.31089	1.34341	0	0	2.58624	0.039016	0	0	2.78803	2.39298	0	0	0.0299598	2.2136	0	0.152687	0.222883	0.0500614	1.8346	0.356864	0	0.253117	0.321424	0.275281	0	0	0.215925	0.363743	0.526691	0.320011
hs1241	4.20901	0	0	0	0	0	0	0	0	0	0	0	0	0	0	4.68825	0	0	0	0	0	0	0	0	0	0	0	4.72354	4.69897	4.70774	0	0	0	0	0	0	0	0	0	0	0	0	0	0	0	0	0	4.00375	0
hs1240	0	0	0	0	0	0	0	0	0	0	0	0.0419591	0.0223924	0	0	0	4.17659	0	0	0	0	0	0	0	0	0	0	0	0	0	0	0	0	0	0	0	0	0	0	0	0	0	0	0	0	0	0	0	0
mm1398	0	0.0630885	0	0	0.0241812	0	2.63316	0	0.689385	0	0	0	3.5852	0	0	0	0	0.0137236	0	0	0	0	0	0	1.66996	0	0	0	0	0	3.92701	0.0335894	0.10197	0	0.110965	0	0	0	0.637953	0	5.30656	0	0	4.26761	0.0403694	5.0658	0	2.32505	0
mm678	4.26274	0.0835615	0	0	0	0	2.9369	0	0	0	0	0	0.293347	0	0	0	0	0	0	0	0	0	0	0	2.39604	0	0	0	2.74726	3.1688	0	0	1.03332	0	0.0402916	0	0	0.243663	4.44568	0	4.21313	0	0	4.89219	0	0	0	4.3304	2.71387
hs712	5.14206	4.52143	0	0	0	0	10.2031	0	0	0	4.02182	0	4.60254	0.0267971	0	4.27327	0	0	0	0	4.43297	4.41567	0	5.4698	8.51988	0	0	0	0	0	0	0	0	0	0	0	1.48281	4.8041	0	0	0	0	0	0	3.80243	0	0	0	0
hs680	9.65002	0	0	0	7.99087	0	0	0	0	4.33442	0	0	0	0	0	0	0	0	0	0	0	8.51311	4.10568	4.19526	4.47676	0	4.15601	0	4.17328	0	0	1.9696	0	0	4.73518	0	4.20066	0	0	0	0	0	4.69037	0	0	0.359221	0	0	0
mm1356	0.748605	0.739956	0	0	0.25313	1.1211	0.0909324	0	0	0.0301784	0.531637	0.184255	0	0	0	0.0815356	0.435663	0.0272618	0	0.629276	1.03466	0	0.753386	0	0.162959	0	0	0.0143855	0	0	0.029569	2.17349	0	0	1.50233	0	0	0.608024	0.857447	0	0.14726	0	0	0	0	0.362674	0	2.01852	0.0574658
mm680	0.0327356	0.0118533	0	0	0.0166192	0	0	0	0	0	0.0684883	0.0887672	0	0	0	0	0	2.05107	0	0	0	0	0	0.644448	0	0	0	0	0	0	0	0.0128288	0	0	0	0	0	0.0241933	0.0141973	0	0.283257	0.0137929	0.116647	1.5154	0	0	0	0.0160305	0.268647
hs612	0	4.10735	1.13422	0	4.35924	0	0	0	0	0	9.56004	0	4.08339	0	0	4.16052	4.14327	10.5206	0	0	0	0	0	0	13.1577	0	4.17379	0	0	0	3.37095	4.05935	2.89193	0	0	0	0	4.44209	0	0	0	0	0	0	0	0	0	0.0571759	0
hs1499	1.07303	4.61748	1.0187	0	0.0222802	0	0.0110448	0	2.85805	0	2.72763	3.06574	6.71033	4.47541	0	0	0	2.17994	0	0	1.02664	0	0	0	0	0	0	0	0	0	0.0729776	4.0864	1.23125	0	0.0763459	0	0.0252476	6.39266	0.0877064	0	0	0.0825262	1.64564	4.10168	4.12477	0	0	3.19786	2.31471
hs2418	9.8971	0	0	0	0	0	0.0173741	0	0	0	0	0	0	0.0415739	0	0	0	0	0	0	0	0	0	0.261025	0	0	0	0.0188699	0	0	0.0178478	0.0681295	0	0	0.0211442	0	3.57709	0	0	0	0	0	0	13.465	0	0	0	0	0
mm619	0	0	0	0	0	4.0274	0	4.03372	0	0	0	0	0	3.08698	0	5.18481	4.27376	0	0	0	4.12308	0	0	0	0	0	0	0	0	0	0	0.982667	0	0	1.93403	0	0	3.56342	0	0	0	0	0	0	0	3.64431	0	0	2.65306
hs1645	0	5.43771	0	0	0.0191094	0	0	0	0.0431409	0	1.64755	2.4606	0	0	0	0.175405	0	0	0	0	0	4.37854	0	0	0	0	0	0	0	0	0.0229265	4.13364	0.0211109	0	4.16947	0	0	4.63099	0.0726028	0	0.0669438	0	4.4699	0	0	0	0	0	0
mm920	5.05457	8.58024	0	0	0.0554254	0	0	0	0	0	0	0	2.7893	0	4.08573	0	0	0	0	0	2.67097	3.1691	0	5.51154	0	0	0	4.49601	4.48017	0	4.00087	0	0	0	0.0111184	4.34578	0	6.96248	0.0229421	0	0.0275833	0	0.016007	4.68403	0	2.28899	0	1.32543	0
hs1271	4.35906	3.25837	0	0	0	0	0	0	0	0	0	0	9.10138	0	0	0	0	0	0	0	4.22841	4.4558	0	3.6659	0	0	0	4.84771	4.56225	0	0	0.171423	0	0	0	0	1.49316	4.04624	1.08619	1.04594	0	0	0.894659	4.10227	0	0	0	3.10352	0.901835
hs2415	4.0573	0.0101187	4.6038	0	0.011028	0	4.01682	0	0	0	0	0	0	0	0	0	0	0	0	0	0	0	0	0	0	0	0.0133106	0	4.54338	4.55569	0	0	0	0	0	0	0	0	0	0	0	0	0	4.0548	0	0	0	0	0
mm621	0	0	0	0	0	0	0	0	0	0	0	0	0.0531605	0	0	0	1.33001	0	0	0	0	0	0	0	0	0	0	0	0	0	0	0.0825121	0	0	0.0556304	0	0	0	3.9433	0	3.65248	0	0	0	0	0	0	4.05084	0.0329049
mm622	0.905002	0.650285	0	0	0	0	0	0	0	0	0	0.0398583	0	0	0	0	0	0	0	0	0	0	0	0	1.87784	0.0723768	0	0	0	0	0.0129686	0.0103704	0.014986	0	0.379769	0	0	0.74343	0	0	0	0	0.127029	0	0	0	0	0.246924	0
mm921	0	0	0	0	1.47032	0	1.6837	0	0	0.259748	0	0	0	0.398643	0	0	0	0.0147702	0	0	0	0.481487	0	0	0	0	0	0	0	0	0	0	0	0	3.94008	0	0	0	0.0224476	0	0	0	0	0	0	0	0	0	4.48082
mm329	0	0.391909	0	0	0	0	0	0	0	0	0	0	0.329394	0	0	0	0	1.13649	0	0	0	0	0	0	0	0	0	0	0	0	0.320495	0	0	0	0	0	0	2.10276	0.0934959	0	0	0	0	0	0	0.188328	0	0.102024	0
mm307	0	0	0	0	0	0	0	0	0.369337	0	0	0	0	0	0	0	0.140069	0	0	0	0	0	0	0	0	0	0	0	0	0	0	0	0	0	0	0	0	0.0315868	0	0	0	0	0	0	0	0	0	0	0
mm723	4.34008	1.72087	4.93554	0	1.6263	0.0127796	0	0	0	0	0	0	3.10749	0	0	0	0.359958	4.9914	0.38948	2.15546	1.90628	0.479666	0.0831379	0	0	0	2.74972	0	4.34294	0	0.0812203	0.0992271	0.0860878	0	0.0374388	0	0	1.64744	0.0853905	0	0.0785447	0	0	1.19807	0.0161189	0.0329592	0	0	0.0158205
mm1366	4.67449	3.36205	0	0.332063	0	1.39137	1.54087	0	4.64716	0	0	3.12236	0	0	0	0	0	0	0	0	1.42477	2.00717	1.34005	0.312922	4.35363	0	0.16993	4.70169	4.70169	4.4032	2.91316	0.312777	1.20971	1.38191	0.0177461	0	1.16222	0.905086	0	0	0	0	0	8.28142	0	3.08307	0	0.428019	0.43579
mm1177	0	4.56198	0.191348	0	0	0	0	0	0	0	0	0	0.197823	2.42406	0	0	0	0	0	0	0	0	0	0	0.0701219	0	0	0	0	0	0.0189787	0.0219351	0.0191449	0	0.0214408	0	0	4.83737	0.0312361	0	0.0350326	0	3.6526	0	0	0	0	0.148872	0
hs483	0	4.00966	0	0	0.0461019	0	0	0	0	0	0	0	0.494295	0	0	0	0	0	0	0	0	0	0	0.194027	4.11126	0	0	4.48967	4.41231	0	4.63803	0	3.69431	0	4.31535	0	4.02228	4.1463	0	0	4.16304	0	0	0	0	0	0	0	3.63494
hs482	0	0	0	0	0	0	0	0	0	4.06144	0	0	0	0	0	0	0	0	0	0	0	0	4.14714	0	0	0	0	0	0	0	3.88812	0	0.038196	0.0409613	0.0427906	0.0328307	0	4.08287	0	0	0	0	0	0	0	0	0	0	0.337368
mm1282	0.0125182	0	0	0	0	0	0	0	0	0	0	0	0	0	0	0.020967	0	0	0	0	0	0	0	0	0.0765269	0	0	0	0.0135213	0.0105452	0	0	0	0	0.0144576	0	0	3.83746	0	0	0.0810236	0	0	0	0	0	0	0.0241062	0
mm370	0	4.27151	0	0	0	0	0	0	0	0	0	0	0.313754	0.0355855	4.47079	0	0	0	0	0	0	0	0	0.152451	0	0	0	0	0	0	0	0.0473275	0	0	0.120368	0	0	5.04705	0	0	0	0	0	0	0	0.478077	0	0	0
hs498	0	0	0.205787	0	0	0	0	0	0	0	0	2.63145	0	0	0	0	0	0	0	0	0	0	0	0	0	0	0	0	0	0	0	0	0	0	0.133298	0	0.784666	0.0572837	0.789914	0	0	1.07473	0	0	0	0	0	3.45849	3.24662
mm144	0	0.0234773	0	0	0	0	0	0	0.925777	0	0	0	0	0.0135761	0	0	0	0	0	3.64446	0	0	0	0	0	0	0	0	0	0	0	0	0	0	0	0	0	2.47667	0.0490976	0	0.0331267	0	0	0	0	0	0	0.0796308	0
hs1571	4.53145	0	0	0	0	0	0.0111668	0	0	0	4.01922	0.149501	0	0	0	0	0	0	0	0.0607137	0	0	0	0	4.23565	0	0	4.23227	0	4.25371	0	0	0	0	0.854723	3.353	3.77904	3.82205	0	0	0	0	0	4.42949	0	2.28342	0	1.57749	2.27636
mm911	0	9.12645	0	0	0	0	0.360117	0	0	0	0.0136505	4.00158	4.49364	0	0	9.21664	0	0	0	0	0	0	0	0.0101308	0	0	0	0	0	0	0.100508	0.116295	0.0938596	0	0.23787	0	3.44593	0.345064	4.25554	0	3.95506	4.23407	6.01368	9.50713	0	0.605906	2.39845	4.06326	4.58079
hs611	5.43063	4.61261	0	0	3.77707	0	0	0	0	4.10292	0	0	5.50724	4.6038	0	0	4.38722	0	0	0	0	0	0	1.54875	0	0	0	4.05306	0	0	0.531662	0.670694	4.9914	0	3.79763	0	0	4.48221	4.21977	0	4.25493	3.29969	0	4.79048	0	0	0	0.0192083	0
mm77	0.281404	0	0	0.0227913	1.40356	0	0	0	1.81633	0	0	0	1.17593	0.942629	0	0	0	0	0	0	0	0	0	0	0.0786786	0	3.53794	0	0	0	0.288131	0.240613	0.349703	0	0	1.68296	1.73209	0.0375563	0	0	0.0408599	0	0	0	0	0	0	0	0.0596121
hs1973	0.0149855	2.1508	0	0	0	0	0.0176482	0	1.1728	0.018639	0.498905	2.88835	4.96664	0.133486	0.499306	0.246262	0.266239	0	0	0	0	0	0	0	0.0173084	0	0.191536	0.577338	0.569241	0	4.04909	4.03171	0	4.00448	4.52131	4.47176	4.039	0.188998	0.156938	0	0.0493443	0	0	0	0.0140584	0	0	0	5.53306
hs925	0	5.22188	0	0	3.41149	0	0	0	4.06803	0	0	0	0	0	0	0	0	0	0	0	0	0	0	0	0.68779	4.44612	4.28567	1.33381	1.20289	1.33381	0	4.2435	0.0707604	0	0	1.51688	0	0	0	0	0	0	0	0	4.60991	0	0	0	0
hs833	0	4.03163	0	0	0	0	0	0	0	0	4.14874	0	0	0	4.25181	0	0	0	0	0	0	0	0	0	0	0	4.46852	0	0	0	0	0.143351	0	0	1.16999	0	0	0.798871	0	0	0	0	0	0	0	0.0170089	0	0	0
hs846	0	4.07058	0	0	0	0	0	0	0	0	0	4.88347	0	4.2668	4.0675	0	0	0	0	0	0	0	0	0	4.90658	0	0	0	0	0	4.04769	4.05453	0	0	4.26201	0	0	0	0	0	0	0	0	0	0	0	0	0	0
hs827	4.53018	4.00393	0	0	0	0	0	0	0	0	0	4.05601	0	0	0	4.50585	6.9914	0	0	0	0	0	0	4.73518	0	0	0	5.08249	5.79588	0	0	8.82516	4.04335	0	0	0	0	0	0	0	0	0	0	4.50307	0	0	0	0	4.27737
hs2318	4.66154	0	0	0	0	0	0	0	1.46414	0	0.0336595	0.0426778	0	0	0	0	0	0.363437	0	4.03198	0	0	0	0	0.0112049	0	0	0.0553591	0.0311653	0	2.6848	0.240267	2.6398	0	0	0	0	4.08235	0	0	0	0	0.243089	4.55129	0	0.0443969	0	0	0
hs2317	4.60945	0	0	0	0	0	0	0	0	0	0	0	0.0884283	1.15808	0	0	0	0	0	0	0	0	0	0	0	0	0	0	0	0	0	0	0	0	0	0	0	4.03101	3.99627	0	0	0	0	0	0	0	0	4.16267	0
hs658	4.32975	4.13787	0	0	0	0	0	0	0	0	0	0	4.06198	4.05061	0	0	0	3.22125	0	0	0	0	0	0	0	0	4.02919	6.46488	0	0	0	0	0	0	0	9.54516	9.30717	9.12374	0	0	0	4.43297	2.74767	7.33014	0	0	0	4.3522	0
hs2316	0	3.3907	0	0	0.79965	0	0	0	0	0	0	3.87432	0	0.01043	0	4.76646	4.03283	0	0	0.220047	0	4.22768	0	7.84856	0.0411892	0	0.0305261	7.41636	3.1934	3.29749	0	0.186697	0	0	0.30449	0	0	7.42389	4.12407	0.0406424	0.0462543	0	0	3.30429	0.0243483	0	0	4.30307	4.63409
hs1425	0	0	0	0	0	0	4.22768	0	0	7.13742	0	4.90337	0	0	0	0	0	5.43199	0	0	0	0	0	0	0	0	0	0	0	0	0	0.0106158	0	0	1.06771	0.0822678	0.107204	2.06217	0.0920627	0	0	0	0	0	0	0.142742	0	0.0831487	0.0984006
hs1660	0	0	0	0	0	0	4.59299	0	0	0	0	2.87129	0	0	0	0	0	0	0	0	0	0	0	0	0	0	0	0	0	0	0	0	0	0	0	0.0910174	0	1.0505	0	0	0	0	0	0	0	0.0393551	0	0	0
hs2315	4.65561	0.099264	0	0	0	0	0	0	0	0	0.0474613	0.236238	0	0	1.72022	0	0	0	0	0	0	0	0	3.25813	0	0	0	0	0	4.47237	0	0	0.0161848	0	0.011924	0.309025	0	0	0	0	0.150631	0	0	0	0	0	0	0.0702021	0
hs293	23.0919	20.8189	0	0	0	0	0	0	0	0	0	0	0	0	4.63827	0	0	0	0	0	0	0	0	5.04587	8.37516	0	0	4.56225	14.5726	4.44009	5.41749	0	4.0744	0	0	3.34771	3.68272	0	0	0	0	0	0	4.90658	0	0	0	0.0103955	0
hs173	13.1628	10.8184	0	0	2.13402	4.3536	4.76195	0	0	0	0	0	1.80897	4.38217	4.57187	0	0	0	0	5.48413	0	0	4.20761	1.5817	0	0	4.64164	0	13.1082	0	8.58616	5.26262	4.11182	4.34104	9.86298	4.29499	0	5.73535	4.07727	0	0	4.4961	8.7038	10.1764	0	0	0	0	4.2194
hs1568	8.96588	4.19292	0	0	4.23557	0	0	0	0	0	0	3.81392	0	0	3.79305	3.35034	0	0	0	0	0.147027	0	0	0.0978244	4.15243	0	0	4.48017	4.48017	0	0	0	0	0	0	0.0349376	0	0	2.20993	0	0	0	0.547712	8.16299	0.427015	0	0	2.47119	7.34999
hs532	0	4.17914	0	4.07727	3.42123	0	0	0	0	0	0	0	0	4.16052	4.03231	3.23555	11.7731	0	4.72584	0	0	5.08831	0	0	0	0	0	8.01252	4.0602	4.19193	12.2423	12.2901	7.71584	0	3.36822	0	4.17683	0	0	0	0	0	2.1698	8.50486	5.28567	0	0	0	0
hs1515	1.23101	0.215758	0	0	0.0192637	0	0	0	0.0809354	0	0.082595	0	0.0307615	0	0.803931	0	0	0	0	0	0	0	0	0.0630364	4.9548	0	0	0.913286	0.891567	4.17596	0	0.0426408	1.54541	0	0	0	0	0.15593	0	0	0	0	0	0	0	0	0	0	0
mm801	3.67997	4.5908	0	0	0.0716177	0	1.29572	0	0	0	3.8945	0.15901	0	1.27813	0.0402361	0.677033	3.79626	0	0	0	2.38568	2.48277	0	6.18273	0.315608	0	0	4.04344	3.40499	0	1.36209	1.04111	1.30316	0.0140652	1.60005	3.041	0	2.45147	0.0254387	0	0.0150723	0	0	3.51661	0	2.34505	0.0147933	0.110167	0.030697
hs1626	0	0.510086	0	0	0	0	0	0	0	0	0	3.94203	0.0789285	0	0	0	3.17289	0	0	0	0	0	0	1.21686	4.2748	0	0	0	0	0	0.910794	0.184376	1.0397	0	1.15187	0.117689	0.0960509	1.26617	4.42713	0	4.11625	0	4.22733	0	0	0	0	0.0205563	4.04044
mm398	4.42213	0	0	0	0	0	0	0	0	0	2.28819	4.79579	3.53378	0.543245	0	0	0	0	0	0	0	3.08554	0	2.70871	0	0	0	0.232966	0	0	0	3.08003	0	0	4.21661	0	0	4.44765	3.63795	0	0	0	5.74818	0	0	0	0	4.04761	5.27982
mm399	0	0	0	0	0	0	0	0	2.37084	0	4.08759	0	0	3.68104	0	0	0	0	0	0	0	0	0	0	0	0	0	0	0	0	4.20487	0.380163	0	0	4.09014	4.50043	4.10367	1.66235	4.36151	0	4.36552	0	5.12494	1.30557	0	0	0	0.0217134	0.0167662
mm400	0	0	0	0	1.70105	4.01547	4.02091	0	0	0	0	0.156276	0	0	0	0	0	0	0	4.39147	0	1.14029	0	5.0804	0	0	0	0	4.48678	0	5.5715	0	0	0	0	0	0	0	0	0	4.17198	5.23284	0	0	0	0	0	0	0.105786
hs1831	0	3.37627	0	0	0	0.0311525	0.0756153	0	1.25867	0	3.86647	0	3.43546	0	0	0	0	0	0	3.54333	2.99293	0	0	0	3.87124	0	0	0.109238	0.101191	0.104321	0	0	0	0	0	0	0	0	0	0	0	0	0.0183776	0	0.0279965	0.352241	0	0	0
hs2314	0	0	0	0	0	0	0	0	0	0	0	0	0	1.0434	0	0	0	0	0	0	0	0	0	0.135762	0	0	0	0	0	0	0.0549804	0	0.57963	0.0968206	0	0	0	0	3.22565	0	3.18936	3.72791	3.31052	0	0	0	3.53681	3.0415	3.39297
hs2308	5.33041	5.30832	0	0	0	0	0	0	0	0	0	0	0	0	0	0	0	0	0	0	0	0	0	0	0	0	0	4.08733	4.73281	4.20271	0	0	0	0	0	0	0	0.929853	0	0	0	0	0	4.28986	0	0	0	0	0
hs2309	0	0	0	0	0	0	0	0	4.10321	0	0	1.12244	0	0	4.52288	0	0	0	0	0	0	4.32816	0	1.67955	0	0	0	4.70997	4.40894	4.70997	0.0619583	0.368836	0.0260763	0	0	0	0	0.0541659	0	0	0	0	0	0	0	0.0102092	0	0	0
hs2313	0	4.23433	0	0	0	0	0	0	0	0	0	0	0	0	0	0	0	0	0	0	4.04027	0	0	3.94592	0	0	0	4.33507	9.98441	4.15552	0	0	0	0	0	0	0	0	0	0	4.05651	0	0	0	0	0	0	0	0
hs1642	0.484212	9.03995	0	0	0	0.402406	4.27294	4.3384	0	4.826	4.98263	0	0.408561	0.0353281	0	0	0	0	4.03692	0.670931	0.2247	0	0	4.36051	0.0587057	0	2.10576	0	0.0235664	4.07059	4.32759	0.0389062	0.0551061	0	0	0	0	4.46344	0	0	0	0	0	0.489663	0	0	0	0	0
hs2312	11.7881	0	0	0	0	0	0	0	0	0	0	0	0	0	0	0	0	0	0	0	0	0	0	0	0	0	0	8.45518	5.3851	4.02273	0	0	0	0	0	0	0	5.02862	0	0	0	0	0	16.3006	0	0	0	0	0
hs2311	0	0	5.56061	0	0	0	0	0	0	0	3.99146	0	8.45781	0.669443	0	0	0	0	0	0	0	0	0	4.99919	0	0	0	0	4.28819	0	0	0	0	0	0	0	0	4.73712	0	2.65868	0	0	4.36051	0	0	3.89542	0	0	0
hs2310	0	0	3.76559	0	0	0	0	0	0	0	0.117935	0	0.0101229	2.1027	4.15215	0	0	0	0	0	0	0	0	0	0	0	0	0	0	0	4.04528	0	0	0	4.057	0	0	0	4.0306	0	4.29158	0	0	0	0	5.98829	0	4.04526	4.97955
hs298	0	0	0	0	0	0	0	0	0	0	0	0	0	0	0	0	0	0	0	0	0	0	0	4.13253	0	0	0	4.4168	4.25026	4.24109	0	0	0	0	4.03012	0	0	0	4.36151	0	0	1.12729	5.46852	0	0	0	0	4.85387	0
hs799	9.45425	5.90715	0	0	0	0	0	0	13.155	0.0745756	0	0	4.04239	0.0945037	0	0	0	0	4.39038	0	0	3.84328	0	0	0	3.46711	0	8.76302	8.67414	9.24291	4.43652	4.12137	0	0	0	0	3.80962	0	0	0	0	0	0	14.7398	7.19376	0	0	0	0
hs793	0	4.15058	0	0	0	0	0	0	4.02319	0	4.48017	4.94692	0	0	0	0	0	0	0	0	0	0	0	4.73968	4.54061	0	0	4.01547	4.21896	0	4.28021	8.32742	8.57689	0	0	2.9036	2.84457	0	2.19808	0	0	4.13847	0	0	0	1.70905	0	0	2.35227
hs1876	0	0	0	0	0	0	0	0	0	0	0	5.04048	0	4.00085	0	0	0	0	0	0	0	0	0	0	0	0	0	0	0	0	4.10324	0	0	0	0	0	3.81127	0	0	0	0	0	2.8042	0	0	0	0	0	0
hs720	0	0	0	0	0	0	0	0	0	0	0	0	0	0	0	0	0	0	0	0	0	1.97443	4.32057	9.55064	0	0	0	0	4.56864	0	0.139151	0	0	0	0.143265	1.21685	0.813845	0	4.00745	0	0	0	0	0	0	0	0	4.54821	4.50724
hs1069	0	0	0	0	4.13312	4.02919	4.31966	0	0	0	0	0	4.02148	4.52724	0	0	0	0	0	4.40894	0	0	0	8.57993	0	0	0	0	0	0	4.23042	0	0	0	8.89836	0	4.23166	4.08991	0	0	0	0	0	5.17522	0.486229	5.02548	0	4.47886	4.2827
hs1167	0	0	0	0	0	0	5.0044	0	0	0	4.21735	0.0544443	3.28297	0	0	4.49621	4.49757	0	0	0	0	0	4.8412	3.99958	0	0	0	4.70774	4.40671	4.70774	4.2907	8.78345	4.1223	0	4.73453	0	0	0	4.21254	0	0	0	0	0	0	0	4.16178	0	4.50788
hs218	8.69755	4.29757	0	0	0	0	4.29757	0	0	4.30715	0	4.63445	0	0	0	0	0	4.86967	0	4.28819	4.266	0	4.02411	0	5.96721	0	0	4.24109	4.24109	4.11577	0	4.35067	0	0	4.53462	0	0	4.26761	0	0	0	0	0	8.11623	0	0	0	0	0
hs219	0	3.79974	0	0	4.37846	0	0	0	0	0	0	0	0	0	4.44825	0	0	0	4.1891	0	0	0.0879963	0	0	0	0	4.12901	0	0	0	0	0	0	0	0	0	0	4.68194	4.46138	0	4.11733	0	0	0	4.02319	0	0	0.061927	5.49214
hs220	0	5.54516	0	0	0	0	4.08938	4.13906	4.18776	0	0	0.858106	4.48149	4.10679	0	0	0	0	4.15365	4.78809	0	0	4.05012	9.32731	0	4.17653	4.41005	0	4.8962	4.56384	9.5998	6.13253	9.17768	0	0	0	4.99526	4.40539	0	0	0	0	8.9201	4.49894	0	4.25727	0	4.16115	4.41293
hs999	0	0	4.82974	0	0	0	0	0	5.90225	0	0	0	0	0	0	4.10902	4.60555	4.02228	0	0	0	4.56349	0	0	0	0	0	0	0	0	0	0	0	0	0	0	4.05457	4.07417	0	0	0	0	0	0	0	0	0	4.14086	0
hs221	10.7409	0	0	0	4.05061	0	0	0	4.14569	0	0	0	4.23367	4.05404	0	0	0	0	0	0	0	0	0	0	8.79214	0	0	9.21814	10.361	8.6423	0.283772	0.221976	0	0	0	4.53731	0.238362	4.52433	0	0	0	0	0	5.65956	4.24566	0	0	0	0
hs1080	0	0	0	0	0	0	0	0	0	0	0.0449852	8.43393	0	4.22915	0	0	0	0	0	0	0	0	4.25727	0	0	0	0	4.71897	9.12867	4.71897	5.65169	0	3.68201	0	3.30886	0	3.67822	0	0	0	0	0	0	0	0	0	0	0	0
hs954	0	0	0	0	4.42251	0	0	0	0	0	4.13608	0	0	4.68194	8.84551	0	0	4.18243	0	4.40894	4.23582	4.78516	4.00555	5.15058	8.41867	0	8.84064	4.4168	8.54992	4.24109	8.25103	4.07569	0	0	8.34632	0	0	4.1261	4.9393	0	4.4389	4.82681	4.03433	4.88941	0	0	4.03245	5.31605	5.32148
hs1215	0	0	0	0	8.36342	0	0	0	2.34092	0	0	4.22298	0.339029	0	0	0	0	0	0	8.26007	0	0	8.48127	4.9914	0	0	5.18046	4.52473	4.52473	4.05407	0	0	0	0	0	0	1.68732	0	4.00584	0	0	3.9599	0	0	0	0	0	4.30652	0
hs222	4.47496	1.48803	3.67621	0	0	0	0	0	0	0	3.36857	0	0	7.84814	0	0	0	0	0	4.21114	0	0	0	4.78252	3.09295	0	5.66959	8.94404	5.27327	4.24109	0	0	0	0	0	0	0	8.32995	0	0	0	0	0	4.59346	0	0	0	0	0
hs956	4.84164	0	0	0	1.93185	0	0	0	4.42251	3.00342	5.56703	0	4.02641	0	0	4.3279	4.28567	4.02228	0	0	0	0	0	4.69757	4.13727	0	0	9.51354	12.4339	0	0	8.68408	4.55284	0	8.25418	0	0	4.05958	0	0	0	0	0	8.55414	0	0	0	4.27491	0
hs966	0	4.03763	0	0	0.883408	0	4.01682	0	2.82148	8.79771	5.01155	4.04048	9.52978	9.04493	0	0	0	0	0.0108614	4.22548	4.10958	0	0	4.44129	2.11087	0	4.21491	0	2.12212	0	4.2652	0	4.04576	0	8.4356	4.62893	4.11351	9.4945	0	4.29371	0	0	4.32474	4.01412	5.24345	0.392543	0	1.41519	8.44068
hs785	4.95861	4.19723	0	0	0.636185	0	0	0	0	0	0	0	0	0.0192118	0	0	0	4.07263	0	0	4.18442	4.41454	0	0	0	2.8961	0	8.45396	4.11577	4.24109	0	0.0285378	0	0	0	0.0301928	0.0432999	0	4.69465	4.17134	4.5031	4.21538	4.64782	4.42022	0	0	4.67572	4.80967	9.44117
hs792	0	0	0	0	0	0	0	0	0	0	0	0	0	0	0	0	0	9.96756	0	0	0	2.29037	0	4.08991	4.70553	0	0	0	0	0	4.98879	0	0.921159	0	0	0	0	0	4.284	0	4.24795	8.29624	9.23415	0	0	0	4.44491	10.4441	0
hs1192	0	4.06753	0	0	0	0	0	0	0	0	0	0	0	0	3.16729	4.29243	4.06601	0	0	0	0	0	0	4.05208	0	0	0	0	0	0	0	0	0	0	0	0	0	0	0	0	0	0	0	0	0	0	0	1.30326	0
hs684	0	4.75203	0	0	0	0	0	0	0	0	5.14327	0.0100587	0	0	0	0	4.92812	0	0	0	0	0	0	0	0	0	0	0	0	0	0	0	0	0	0	0	0	0	0	0	0	0	0	0	0.0338182	4.15189	0	0	4.07624
hs299	9.33833	9.81427	0	0	0.0620331	0	0	0	0	0	0	18.5658	8.14319	3.96049	0	0	4.0991	0	0	0	3.40813	3.52845	0	4.0048	0	0	0	4.08566	4.19928	4.28364	4.42711	0	4.52091	0	0.0131586	0	0.0638098	0	8.32465	0	6.93522	7.6812	1.36183	10.1319	0	4.36006	0	13.2699	8.27935
hs300	0	0	0	1.03079	0	0	4.04866	0	0	0	0	0	0	3.07131	0	0	0	0	1.79917	4.40894	0	0	4.0348	0	4.36144	0	0	0	0	0	0	0	4.098	0	0	0	0	0	4.25885	0	5.0006	4.05453	0	0	1.81492	0	0	4.53611	4.37779
hs861	4.45636	4.44855	0	0	0	0	0	0	0	0	8.95008	2.00623	0	0	0	0	0	4.07263	0	0	0	0	4.36957	8.25997	8.42114	0	0	0	0	4.06098	4.14146	8.43815	0	0	9.82427	0	0	10.3297	1.92029	0	0	0	0	0	0	4.05998	0	1.92771	0
hs738	0	9.36985	0.226574	0	0	9.02817	5.2738	4.84164	0	4.48812	3.9502	0	5.00656	0	0	0	0	0	0	4.49894	4.62709	0	4.22185	4.36151	0.0244803	0	0	0	0	0	0	0	0	0	0	0	0	0	4.06098	0	0	0	4.12843	0	0	0	0	0	0
hs190	0	0	4.13847	0	0	0	0	0	0	7.80554	4.21325	0	1.9816	0	0	0	0	0	0	0	4.38958	0.049974	3.59071	3.08016	4.49485	0	0	0	0	0	4.12291	4.21729	0	0	0	4.15911	0	0	5.19586	0	5.47237	4.82681	8.88207	0	0	0.510007	4.35067	10.2128	4.10679
hs1798	23.3179	4.28233	1.45943	4.92445	2.68102	0	4.10073	0	0	0	4.19586	6.53265	0	0	0	0	0.026403	4.12784	4.17073	0	0	0	8.36798	4.49757	8.30928	4.48037	0.0396667	0	9.25598	6.25026	13.4778	12.2843	3.86097	0	9.4552	8.31653	0	8.85047	0.361047	0	4.14509	3.70431	3.47917	14.9323	5.37992	5.1904	0	8.63998	6.94296
hs301	0	0	0	0	4.098	0	0	0	0	0	0	0	0	0	0	0	4.78671	0	0	0	0	0	4.22988	0	0	0	4.16304	0	0	0	0	0	0	0	0	4.18709	5.05159	0	0	0	0	0	0	0	0	0	0	0	0
hs2071	4.69897	2.33289	0.0493935	0	2.31133	0	7.00988	0	5.54269	0	0	0.0282266	4.9431	2.99069	0	0	4.15241	0	0	3.67037	4.02595	0	0	0.0369074	0	4.20441	0.0903713	8.33284	8.70374	0.0956516	4.14423	2.4949	0	0	4.22621	7.59349	4.19415	4.21562	0	0	4.01221	0	0	4.15864	4.73227	0	4.08843	4.64758	5.42481
hs1988	4.34969	2.07174	0.506155	0	0.0494099	0	0	0	0.105782	0	0	0.086621	0	0	0	0	0	0	0	4.41123	0	0	2.07527	0.613493	0	0	2.26304	4.03848	4.03848	0	0	0.0142309	0.0145319	0	0	0	0.0131982	0.0125081	0.256144	0	0.202587	0	0.102228	3.83082	0	0	0.198946	0.218198	0.0720843
hs1809	0	0	0	0.0294077	4.41658	0	0	0	8.81093	0	4.00074	0	4.23831	0	0	4.61439	4.05306	0	0	0	0	0	0	4.34775	3.7227	0	0	0	0	0	8.51404	0.0603114	4.80688	0	9.01122	0	0	4.619	0.0208322	0	0.015138	0.0164413	0.0162772	0	0	0.288548	0.0181699	0.0610981	0.0948428
hs1308	8.44185	4.61798	0	0	0.082948	3.61114	3.68015	0	0	0	0	3.2417	4.26043	0	0.115847	3.78247	0	1.22985	0	3.68288	0	4.83798	0	4.92378	0	0	1.04674	4.24689	4.24689	0	0	4.10209	0	0	2.43952	0	0.0408543	0.715765	0.070665	0	0.0197321	4.19398	0	0	9.07717	2.13175	0	0	0
hs2387	0.112619	5.39729	0	0	0.0935728	0	0	0	0	0	0	7.29057	9.02652	0	0.29036	0	0	0	0	0	0	0	0	0	0	0	0	0	0	0	0	0	0	0	0.0181504	0	0	0	0.0186138	0.0183783	0.0208219	0	0.0214417	0	0	0	0	0.0316679	0.0235156
hs1508	4.53018	4.86328	0	0	0	0	0	0	0	0	0	0	0.0737125	0.143946	0	0	4.13312	0.459903	0.0175747	0	0	0	0	0.388844	0	0	4.21467	0.0172261	0.0172261	0.0153988	0	0.0766811	0	0	0.126309	0	0	0.0282095	0	0	0	0	0	0	0	0	0	0	0
hs2077	0	0.868364	0	0	0	0	0.0581616	0	0	0.0107635	0.0443973	0.0386537	0	0	0	0	0	0	0	0	0	0	0	0.0160087	0.0442927	0	0	2.77634	2.17892	0	0.061781	0	0	0	0	0	0	0.0504958	0.0196253	0	0	0	0	0	0	0	0	0	0
hs2082	0	0.51091	0	0	0.0289423	0	0.0208161	0	2.48217	0	0.204703	0	0	0.0120098	0	0.0182787	0.103398	0	0	0	0	0	0	0.719078	0.565562	0	0.752682	0	0	0	0.03414	0	0.0348017	0	0.775438	0	0	3.98454	0	0	0.0236946	0	0	0.134387	0	0	0	0.0623394	0
mm1321	0	4.17459	0	2.43595	0	5.25937	0.947255	3.96693	0.337184	5.32045	0	0.258943	3.95755	1.19734	0	0.139607	0.13359	0	0	5.40116	5.97108	0	1.49502	0.444326	0.0639582	0	0.104931	0	0	0	0	1.9777	0	0	4.23385	0	0	3.44933	2.82839	0.274392	0.501196	0.207229	0.0880173	0	0.01132	2.41205	0	3.18014	2.37194
hs2258	0	0.0207103	0	0	0.0242481	0	0	0	0	0	0	0.0271966	0.570733	0	0	0	0	0	0	0	0	0	0	0	0	0	0.0681702	0	0	0	0	0.573058	0.622523	0	0.0148376	0	0	0.405972	0.542409	0	0.57471	0.400424	0.279439	0	0	0	0.280979	0.558167	0.568869
mm1383	0	1.50609	0	0	0.0565102	0.0266654	0	0	0	0	0	0.482561	0	0	0	0.302788	0.287848	0	0.0439691	0.0126419	0.0337747	0.028785	0.0563311	3.4066	3.48338	0	0.0222415	0	1.8086	0	0.046934	0.050857	0	0	2.27221	0	0	0.0120544	0.0301729	0	0	0	1.10845	0	0.0675112	2.851	0	0.0254338	0
mm1318	1.58272	2.83738	0	0	0.119215	0	0	0	0	0	1.24355	2.99398	0.0475263	0	0	0	0.0530856	0	0	0.0260456	1.75934	2.15461	0.478968	0.0269949	0.19971	0	0	1.38082	2.79869	0	0	0	0	0	0	0	0	1.72411	3.03462	0.0622952	0	0.0649517	0	1.67937	2.18946	0.113891	0	0.0286475	0
mm401	0	0	0	0	0	0	0	0	0	0	0	0	6.24242	0	3.98029	0	0	0	0	0	0	0	0	0.0924793	0.170289	0	0	6.56795	4.67778	0	0.148849	4.21338	0.155898	0	4.0344	0	0.39011	5.34678	0	0	0	0	0	0.387657	0	4.69178	0	0	0.066268
mm402	0	3.64024	0	0	3.16251	0	4.39434	0	3.71837	0	0	0	0	0	4.23615	4.18428	4.19523	0	4.00809	0	0	4.65743	0	1.48103	4.69612	0	0	0	0	0	0.0470826	0.0129361	0	0	0.419846	4.0624	0	0.0385095	0	0	2.45175	0	0	0	0	0	0	0.569335	0.0188734
hs1677	4.51202	4.3935	0	0	0	0	0	0	0	0	0	0	0	0	3.97002	0	0	0	0	0	0	0	0	4.45719	0	0	0.0663204	0	0	0	4.05738	4.4001	0.129156	0	0	0	4.0655	3.756	0.034237	0	0	0	0	5.16555	0	0	0	0.0183694	4.22408
mm403	0	3.48752	0.655343	0	0	0	0	0	0	0	0.0334294	0.940292	0	0	0	0	4.16974	0	0	0	0	0	0	4.63825	0	0	0	4.39902	0	0	0	0	0	0	0	0	0	5.06061	4.38011	0	4.36072	0	4.85022	0	0	0	0	4.02084	0.0491868
mm404	0	0	0	0	0	0	0	0	0	0	0	2.88552	0.642039	0	0	1.31351	3.29356	0	4.14225	0	0	0	0	0	4.52056	0	0	4.04754	0	0	0	0	3.9641	0	0.273209	0.275119	0.27819	0.0214861	0	0	0	0	0	0	0	0	0	0	0.23137
mm405	2.58292	0	4.08824	0	0	0	0.0118657	0	0.0347462	0	0	0	0	0	0	0	0	0	0	3.04936	0	0	0	0	0	0	0	2.98157	0	0	0	0	1.72305	0	0.0839799	0	2.9331	0	0	0	0	0	0	2.51698	0	0	0	0	0
mm406	0	0	0	0	2.29928	0	0	0.0458404	0	0.0439757	0	0	5.6797	0	0	0	0	0	0	0	0.0478816	0	0	4.5157	0	0	0	0	0	0	0	0	0.453894	0	0.600652	0	0	4.18718	1.2791	0	0	0	1.75326	0	0	0	0	0	1.27423
hs1600	0	4.43533	0	0	0	0	0	0	4.18575	0	0	0.011077	4.39325	0	0	0	5.80967	0	0	0	0	4.14448	0.76567	0.0127673	0	0	0	0	0	4.13549	0	4.20412	0	0	0	0	0	12.6797	5.20482	4.15304	4.57675	0	5.07779	0.379952	0	4.12374	0	4.4318	0
mm407	0	4.17504	0	4.536	0	0	0	0	0	0	0	4.34227	0.248	0	7.5572	0	0	0	0	0	0	0	0	0	0	0	0	0	0	0	0	1.27251	1.38198	0	1.36405	1.64805	0.893338	7.51497	2.01576	0	0	0	0	4.85938	0	0	0	0	0
hs1325	0	1.18017	0	0	0	5.05709	0	4.66556	0	4.35765	0	1.9962	8.2534	5.46321	0	0	0	0	0	0	4.57643	0	0	0	0	0	0	0	0	0	0	5.09585	0.0278568	0	0.481364	0	4.83359	3.9119	2.40225	0	2.91228	0	0	0	0.515619	0	0	0.0354274	5.42243
mm408	0	0	0	0	0	0	0	0	0.718911	0	0	1.49442	0	0	0	0	0	0	0	0	0	0	0	0	0	0	0.0315149	0	0	0	0	0	0	0	0	0	0	0	0.495559	0.474869	3.84806	0	0.0313363	0	0	0	0	7.42694	4.33937
mm409	0	0.739949	4.14732	0	4.2805	0	0	0	0.29181	0	0	0.253387	4.37595	0	0	0	0	7.54249	0	0	0	0	0	1.52665	2.02093	0	0	0	0	0	0.147855	3.37666	0.142384	0.139275	0.120326	0	0.153203	0	3.57911	0.0126311	0.144813	0.0124188	0.0122904	0	0	0.77737	0.0122497	7.23055	0.125081
hs1465	5.86419	4.06098	0	0	4.80807	0	4.00922	0	0	0	0	0	0.0784965	0	0.573182	0.667711	0	0.214362	4.07935	0	0	0.0629937	0	4.29323	3.98419	0	0	0	4.31675	4.16115	4.03496	0.07171	0.287313	0	4.56892	0	0.0108963	0.0734013	5.34367	0	1.04713	0.509942	4.33061	5.86419	0	4.02425	0	4.415	7.77114
mm410	0.335898	4.10356	0	0	0	0	0	0	0	0	0	0	5.31824	0	0	0	0	0	0	0	0	0	0	0.338759	0	0	0	0	0	0	1.75835	0.991025	1.88773	0	1.9614	0	0	1.54679	0	0	0	0.395239	0	0	0	0	0	0	0
mm411	0	0	0	0	0	0	0	0	0	0	0	4.83093	0.437787	7.91972	0	0	0	0	0	0	0	0	0.0266205	0	0	0	0	0	0	0	3.5718	0	0.163811	0	0.0671369	0	0	0	3.93667	0	3.91126	0	0	0	0	0	0	0	5.84834
hs769	0	6.59811	0	0	0	4.20135	0	0	0	0	0	0	0.0181091	4.88008	0	0	0	0	0	0	0	0	0	0	4.10735	0	4.28988	0	0	0	4.5157	0	4.4045	0	0.299251	4.30452	8.43036	4.07779	0	0	0	0	4.00966	0	0	0.379573	0	0	0
mm412	4.76447	4.08715	0	0.606939	6.14889	0	0	0	0	0	0	0	0	0.852259	0	0	0	0	0.533577	0	0	0.583402	0	16.3173	0	4.68202	0	0	0	0	0	4.61798	0	0	7.32264	0	0	0.299023	1.22551	0	1.15566	0	0	0	0	3.49141	0	0	0
hs296	4.24336	0	0	0	0	0	0	0	0	0	0	0	0	0	4.08355	4.23958	0	0	0	0	0	3.64525	0	0	0	0	0	0	6.47714	5.78244	0	0	0	0	0	0	0	5.46597	4.53018	0	3.80974	0	0	0	0	0	0	4.49169	0
hs1703	0	0	0	0	0	0	0	0	0	0	0	3.92503	0	0	0	0	0	0.0660287	0	0	0	0	0	0	0	0	0	4.05306	0	0	4.76695	9.92762	4.8593	0	4.14433	0	0	0	0	0	0	0	0	0	0	0	0	0	0
hs501	0	12.8999	0	0	0	0	0	0	0	0	0	4.43771	0	0	4.27572	0	0	0	0	0	0	0	0	0	0	0	0	0	0	0	0.0204987	0.374932	0.0205707	0	0.0202533	0	0	0.19751	0	0	0	0	4.83536	3.04957	0	0	0	0	0
hs629	4.13906	4.13194	0	0	0	0	0	0	0	4.00043	0	0	0.109458	0	0	0.0477996	0	4.25806	0	0	0	0	0	0	5.02503	0	4.18977	0	0	4.43533	10.062	5.74752	4.51856	4.23993	5.96623	0	0	0	0.0110488	0	0	0	0	4.31158	0	0	0	0.0130102	0.0115874
mm48	0.621572	4.56578	0	0	0.176602	4.44636	6.09928	4.52924	0	4.82753	1.67332	1.9755	1.43459	1.08167	0	0	0	0	0.036513	1.76187	4.30528	0	4.79395	0	0	0	0	0	0.508193	0	1.25284	0.0566252	1.32806	0	4.45864	0	4.61128	1.04683	5.18687	0	0.643508	0	0	0.718478	0	0	0	4.55615	0
hs1430	4.21354	7.66249	0	0	0	2.8823	3.88569	0.0761501	4.88475	0.0864	0	0	4.3317	0	0	0	0	0	0	0	0.0747442	0	3.47846	4.05558	3.90339	0	0	4.40671	4.10513	4.03245	4.32057	0	4.10549	0	4.57273	0	0	0	4.23284	4.14569	0.0124267	4.44249	8.51821	8.56094	0	0	4.33255	4.71381	4.24565
hs1604	4.51856	4.07058	0.0250833	0	2.32537	0	0	0	1.91201	0	0	2.93303	4.56703	0.0503945	0	0	0	2.77616	0	0	0	0.392071	0	0.049402	3.01949	0	4.10846	4.08566	4.19928	0	0	2.58389	3.78955	0	3.64163	0	0	4.52758	0.565149	0	0	0.954265	0.19605	0.0143297	0	0.13452	0	4.45155	3.63676
hs297	9.882	4.51999	0	0	4.06431	0	0	0	1.47397	0	0	0	0	0	0	0	0	0	0	4.0529	5.685	4.57699	0	0	2.00052	0	4.2863	4.42366	12.9793	4.68825	4.4318	0	4.04528	0	1.28504	0	0	7.00037	0	0	0	0	1.69721	5.90309	4.16304	0	0	4.26122	0
hs1374	5.01769	0	0	0	0	0	0	0	0.0463491	0	3.24545	0	0	0	0.14077	0	0	0	0	0	4.04618	0	4.03058	9.53237	4.93496	0	0	4.20979	4.55129	0.324458	2.59303	2.88407	7.13237	0	2.88644	5.67942	0	1.79592	3.78423	0	0	0	1.25737	0.377126	0	0.0112363	0	3.26515	3.88993
mm123	4.67985	4.68551	0	4.49636	1.20975	2.6198	2.54293	0	0	0.0140161	0.809844	0.016603	0.0285074	3.90736	0.29717	0	0	2.91905	0.0392112	2.54507	0	0	2.28428	7.9454	0.230029	0	0	4.9605	4.56225	1.35838	2.34814	0	4.01724	0	4.21942	0	4.33571	2.74357	4.16684	0	4.04832	0	4.13018	2.33868	1.16321	3.72787	0	0.183768	0
hs1457	0	0	0	0	0	0	3.82289	0	0	0	0	0	0	4.29673	0	0	0	4.60941	0	0	0	0	0	0	0	0	0.0573149	4.46629	4.25245	0	0	0.0401229	0	0	0.0376128	0	0	0.0562336	0	0	0	0	0	0.254279	0.0519865	0	0	0	0.0232786
hs1506	0	0.0323977	0	0	0	0	0	0	0	0	0	0	0	0	0	0	0	0	0	0	0	0	0	0	0	0	0	0	0	0	0	0	0	0	0	0.928492	0.638751	0.584787	2.1719	0	6.11181	0	0	0	0	0	0	1.3857	0
hs1479	0	0	0	0	1.0655	2.06948	0	0	0	0	0	0	0	0	0.0146481	0	0	0	0	0	0	0.0186157	0	4.22725	0	0	0	0.0182365	0	0	0	0	0.0647171	0	4.16996	0	0	4.82418	0.0147693	0	0	0	0	0.0190932	0.0136658	0	0	0.0255766	0.0332684
hs1025	9.50658	4.95078	0	0.0133145	0	0	0	0	0	0	0	0	0.0237823	2.51085	0	0	0	0	0	0	0	0	0	0	4.84164	0	0	4.48017	4.48017	0	0	0.785499	4.26281	0.164796	4.6804	0	0	0	1.54428	0	0	0	0	0	0.0154016	0.0162063	0	4.40894	0
hs400	0	0	0	0	5.02884	0	0	0	0	0	0	0	0	0	4.12033	4.54821	4.08197	0	0	0	0	0	0	4.12292	0	0	0	4.72354	4.42366	4.72354	0	4.53313	0	0	1.83144	0	0	1.47899	0	0	0	0	0	4.40782	0	7.47625	0	0	0
hs2058	0.0240065	0	0	0	0	0	0	0	0	0	0	0	0.0116842	0	0	0	0	0	0	0	0	0	0	0	0	0	0	0	0.0308556	0	0	0	0	0	0	0	0	2.6496	2.93748	0	2.99974	0	5.19633	0.0324523	0	0.032618	0	2.71186	0
mm471	0	4.75138	0	0	0	0	0	0	0	0	2.41062	0	0	0	4.33913	0	0	0	0	0	0	0	0	0	0	0	0	0	0	0	0	0.0792012	0	0	0.133845	0	0	0.0134879	1.6187	0	1.48413	0	0	0	0	0	0	0.0196636	1.55651
mm1314	9.42459	0.192888	0	0	0	0	0.141088	0	0.11978	0	0.416723	0.629066	0	0	0	0	1.26156	0	0	0	0.0803257	1.01556	0	1.96978	0.103127	0	3.15904	0.0140732	0.0141036	0.0140184	0	0	0	0	0.106893	3.03363	3.53797	2.29729	0.136301	0	0	0.941289	1.33082	4.52578	0.576959	0	0	4.10846	1.01849
mm1316	0	0.0303153	0	0	0.464963	0	0.0721929	0	0.109376	0	0.0476478	0	0.14375	0.409907	0	0	0	0.0251694	0	0	0	0	0	0.809066	0.940473	0.142276	0	4.3439	0	0	0	0.0169796	0.765141	0	0.0254693	0.0810713	0.0409325	1.61398	4.10018	0	8.3194	0.0501142	0.985975	0.0502863	4.14813	1.31354	0	5.59524	0
hs2038	0	0	0	0	0	0	0	0	0	0	0	0.0387573	0.0256919	0.216202	0	0.0444117	0.0785473	0	0	0	0	0	0	0.1493	0	0	0	0	0	0	0	0.0217952	0	0	0	0	0	0	0.117747	0	0.0115744	0.0103616	0	0	0	0	0.0121207	0.12811	0.111929
mm878	0	0	0	0	2.28759	0	0	0	0.88982	0	0	0.0147303	4.20831	4.23197	0	0	0	3.34926	3.82062	0	0.827968	0.813406	0	0	2.22549	0.0211521	0	7.62596	4.16052	3.30341	1.28398	0.354051	0	0	0.309049	2.74368	0.0164148	0	0	0	0.0684564	0	0	0	3.65734	4.55349	0	0.0788207	0
mm60	9.33685	4.83317	0	0	1.55093	0.074129	0.0418891	0	0	0	0	3.28052	2.18431	0	0	0	0	0	0	0.303569	0.119756	0	2.89586	3.11122	3.75489	0	0	4.35177	4.04127	4.41997	2.59316	2.20306	0.0106936	0	6.18067	0.0109554	0	0	3.21747	0	1.02906	4.54459	4.41071	9.96205	0	0.899195	3.10297	4.42116	4.21466
hs206	0	0	0	4.2161	0.0175288	0	0	0	0	0	0	0	4.86646	0	0	0	4.47756	0	3.74833	0	0	0.56197	0	4.35067	4.95861	0	4.18776	0	0	0	0	0	1.57744	0	1.9999	1.75016	1.80648	4.2652	0	0	0	0	0	0	0	0	0	4.74861	0
hs1214	4.32305	0	0	0	0	0	0	0	0	0	0	0	0	0.813014	0	0	2.66989	4.14206	0	0	0	0	0	8.28901	0	0	0	4.40671	8.36477	4.03245	7.48995	3.42667	6.98384	0	3.79361	5.3422	2.29374	5.46084	4.00261	0	4.06298	5.30495	4.2668	0	0	0	4.55752	4.14752	9.06985
hs207	16.8821	11.0598	0	7.28911	0	0	0	0	0	0	0	0.8607	0	0	0	0	4.31426	0	3.25749	0	0	0	0	4.81531	4.16813	0	4.82102	4.40671	4.10513	4.03245	4.2426	4.2217	4.25571	0	4.78781	0	0	5.09259	4.17263	0	0	0	0	8.8524	4.60206	0	0	0	4.25698
hs1231	0	0	0	0	0	0	0	0	1.25174	0	0	4.10679	0	0	0	0	0	0	0	0.0133892	0	0	0	0	0	0	0	0	0	0	4.39577	0	0	0	0	0	0	4.09366	0	0	0	0	0	8.27354	0	0	0	0	0
hs864	0	0	0	0	0	0	0	0	0	0	0	9.52433	0	0	0	0	0	0	0	0	0	0.0935116	0	0.0447399	0	0	0	0	0	0	0	0	0	0	3.77819	0	0.154854	0	0	0	0	0	0	0	0	0.0409933	0	0	0.24576
hs854	4.11126	0	0	0	0	0	0	0	0	4.82102	0	0	0	0	0.308135	4.01383	4.0821	0	0	0	4.20066	0	0	0	4.50585	4.16494	0	0	0	0	0	0	0	0	0	0	0	0	4.22548	4.0804	4.83863	0	0	0	0	0	0	4.31426	0
hs965	0	4.48017	0	0	0	0	0	0	4.50724	0	0	4.00393	0	4.2668	3.93736	0	0	0	0	0	0	0	0	0	4.79588	0	5.06601	0	0	0	8.10563	4.97881	8.22357	0	5.6517	0	0	4.1986	4.39147	0	2.82815	2.24348	4.92082	0	0	0	4.49349	5.23807	8.42232
hs1092	14.2977	0.0441642	0	0	4.6882	0	0	0	0	0	0.0469399	0.20267	0	4.56225	4.34104	0	0	3.48223	0	0	0	0	0	8.09519	0	0	0	0	4.92386	4.9431	0	0	0	0	4.06958	0	0	0	0	0	0	0	0.612913	10.867	0	0.0205557	0	0.0599279	0
hs1572	4.19238	0.443406	0	5.26088	0	0	0	0	0	0	0	4.22774	0	0	0	0	0	0	0.13856	0	0	0	0	0	4.13906	0	4.85078	4.40618	3.81313	0	3.51344	0	3.17719	0	0	0	0	0.080867	0	0.183055	0.181618	0.0117385	0.0204405	9.75935	0.122036	0	0	0.052886	0
hs1160	0	9.55859	0	0	0	0	0	0	0	0	0	0	4.47774	0	0	0	0	0	0	0	0	0	0	0	0	0	0	4.08566	4.19928	0	0	4.22403	0	0	4.08407	0	0	0	0	0	0	0	0	0	0	0	0	0	0
hs630	4.37779	4.25991	0	0	0	4.01547	7.36	0	0	0	0	5.30142	0	0	0	0	3.61726	4.33205	0	4.39147	0	0	4.00087	4.96631	5.21112	0	0	4.22988	4.22988	0	0.399622	0.559172	0	0	0	0	0	0	4.03012	1.38692	1.34364	1.58217	1.6527	4.05601	0	0	1.5004	8.67181	1.91957
hs187	8.86014	4.53451	0	0	3.96539	0	0	0	2.18304	0	4.49621	0	0	0	0	0	0	4.85078	0	0	0	0	0	0.490185	0	0	0	0	8.0545	0	3.99806	4.56711	4.2907	0	4.27688	0.0114696	0	2.0501	0	0	0	0	0	8.60794	0	0	0	0	4.4229
mm242	0	0	0	0	0	0	0	0	0	0	0	0.0299724	0	0	0	0	0	0	0	0	0	0	0	0	0	0	0	0	0	0	0	0	0	0	0	0	0	0	0	0	0	0	0	0	0	0	0	0	0
hs1116	0	0	0	0	0	0	0	0	0	4.16115	0	4.07734	0	0	0	0	0	0	4.06177	0	0	0	0	1.99174	0	0	0.0236114	0	0	0	4.02091	4.21396	0	0	8.78004	5.14388	4.32514	0	4.20482	0	3.26371	0	0	0	0	0	0	4.03433	0.0216825
hs997	4.15449	0	0	0	4.69465	0	0	0	0	0	4.46092	0	0	0	0	0	0	0	0.0129862	0	0	0	4.011	0.0307173	0	0	4.30386	0	0	0	4.31966	5.10445	0	0	5.58696	0	5.13727	0	0	0	0	0	4.60033	0	0.0174238	4.27343	0	4.73251	4.25337
hs973	0	5.20901	0	0	0	0	0	0	0	0	0	0	0	0	0	0	0	0	0.0145168	0	0	0	0	0	0	0	0	0	0	0	4.0511	0	0	0	0.0186918	0	0	6.34438	0	0	0	0	0	0	0	0	0	0	0
hs1149	4.57675	0	0	0	4.10047	0	0	0	0	0	4.29671	4.31605	0.117565	0	0	0	0	0	0	4.39038	0	5.32698	0	0	0	0	1.80785	8.81796	4.40671	4.83863	4.01716	4.44681	5.40353	0	0	0	0	0	0	0	0	4.23086	0	0	0	0	0	0	0
hs1010	4.80967	0	5.38934	0	9.74831	0	5.16115	0	0	0	0	0	14.8611	4.18776	4.06905	9.09866	0	4.33488	0	0	0	4.80967	0	0.335171	0	0	0	4.33603	4.31876	0	4.09122	3.48144	1.97547	0	11.5347	0	4.35655	5.27737	5.14145	0	3.88324	4.37089	0	0	0	3.96634	4.24601	4.90477	8.69873
mm681	0.0210184	3.29027	0	0	0	0	0	0	0	0	0	0	0	0.0138726	0	0	0	0	0	0	0	0	0	0	4.01413	0	0	0.327483	0.0164794	0	1.71245	0.0976889	0.785336	0	0.241532	0.884033	0.622872	5.80081	0.418296	0	0	0	0	0.0167108	0	0	0	0.630145	0.130233
hs2006	0.476989	0	0	0	0	0	0	0	0.292315	0	0	0	0.885711	0.409631	0	0	0	0	0	0	0	0	0	0	0	0	0	0.357041	0.364909	0.229996	0	0.0139974	0	0	0	0	0	0.115779	0	0	0	0	0	0.533214	0	0	0	0	0
mm682	0	8.11594	0	0	0.0875604	0	0	0	1.76393	0	0	0	0	0.73062	0	0	0	0	0	0	0	0	0	0	3.88249	0	0.0255313	0	0	0	1.41111	0.778032	0.751456	0	0.993389	0	0	0.0662268	4.71282	0	4.08761	2.84961	4.0937	0	0	0	0	8.41169	0.770394
hs1732	8.43194	0	0	0	0.0810152	0.0105708	3.82013	0	0	0	0	0.0250573	0	3.48606	0	4.90683	4.24139	0	0	0.011451	0	0	0	2.73888	0	0	0	8.55142	8.04613	4.3988	3.05862	3.79582	3.12514	0	0.142369	0	0	0	0.0152983	0	0.458945	0	0.012127	4.31771	0	0	0	0.0170173	0
mm1364	0	0	0	0	0	0	0	0	0	5.50865	4.31819	0.364673	0.0718094	0.0665496	0	0	0	0	0	0	0	0	0	0	4.32237	0	0	1.25417	0	1.53579	4.44491	5.06803	5.20273	0	4.82974	0.0262543	4.76447	0.134071	2.89938	0	0.547254	4.01688	2.33941	0	0	0.0574844	0.0324584	2.63402	0
mm1386	4.04008	4.06226	0	0	0	4.69507	4.44614	3.96914	3.91487	0	0	0.0555101	0	0	3.98167	0.186915	0.17957	0	0	0	4.1236	0	0	0.835563	0	0	0	0	5.52913	4.73109	3.93597	0	3.80523	0	0.0175472	4.36872	4.49758	4.53631	4.24872	0	0	0	2.23595	5.1512	0	0.0461712	0	0	0
hs2065	0.155332	0.0884216	0.0121865	0	0.908414	0	0	0	0.177671	0	0.0113299	0.0112568	0.0191832	0	0	0	0	0.0461627	0	0	0	0.3226	0.0574725	0	0	0	1.83347	0	0.155871	0	0	0	0	0	1.05232	0	0	0.0334507	0.26071	0	0	0	0	0	0	0	0	0.269293	0.252007
mm247	4.06618	0	0	0	0	0	0.0106694	0	0	0	0.179448	0.0145792	0	0	0	0.0100109	0	0	0	0	0	0	0	0	0	0	0	0.472024	3.45676	4.73749	0	0	0	0	0	0	0	0	0	0	0	0	0	4.38797	0	0	0	0	0
hs523	0	0.502177	0	0	4.4023	0	0	0	0	0	0	0	4.94445	4.49869	0	0	0	0	0	0	0	0	0	0	0	0	0	0	0	0	4.15963	9.29014	0	0	9.57358	0.0340435	4.22548	0	0	0	0	0	0	0	0	0	0	0	4.34464
mm168	0	0	0	0	0	3.66521	0.0162094	0	0	0	0	0	0	1.47433	0	0	0	0.0143368	0	4.06841	0	0	3.42706	0	0	0	0	0	0	0	0	1.11587	0	0	2.32916	0	0	0	0	0	0	0	0	0	0	0	0	0	0
hs1574	0.112024	0.0381672	1.30736	0	0.727444	0.0136398	0	0	0.276249	0.0103728	0	0.0146853	1.9966	0.479588	0	0	0	0	0	0	0.0105266	0	0	0.0290295	0	0	0.052801	0	0	0	0	0.0298502	0	0	0.584312	0	0	0.0470161	0	0	0	0	0	0	0	1.29697	0	0	0
mm94	0	2.48528	0	0	3.38216	0	2.86512	0	3.30945	0.146068	0	0	0.0291061	0.0259835	0	0	0	0	0	0	0.144117	0	0.118	0	1.00763	0	0	0	0	0	0.288924	0.0134063	0	0	1.63844	0	0	4.57379	4.68923	4.02673	4.89566	4.55943	4.59373	0	0	2.29994	4.58274	7.55439	9.36213
hs1505	0.0103958	2.90905	0.0139169	3.69571	0.0619907	0	0	0	0.138111	0	0	0.774719	1.15056	0	0	0	0	0	3.11897	0.424217	0	0.0470006	0.589523	0.139695	0.048098	0	0.671566	0	0	0	3.05939	3.30326	2.92841	0	7.27876	0	0	1.98112	0.238092	0.0713656	0.201409	0.0428131	0.250321	0	2.72497	6.51262	0.0821421	0.0806626	0.200768
hs798	0	0	0	0	0	0	0	0	3.18541	0	0	0	4.00923	4.98574	0	0	0	0	0	0	0	0	0	0	0	0	3.85597	0	4.08668	0	0	0	0	0	0	0	0	8.168	0	0	0	0	0	0	0	0	0	0	0
hs607	6.56703	0.0142674	4.1986	0	0	0.0675792	0.0578312	0	0	0	4.03527	4.07356	0	0	0	0	0	0	0	0	0	0	0.105422	4.44116	4.1152	0	4.59007	0	0	0	4.80164	4.82573	4.7714	0	8.77881	4.25297	0	4.09528	8.96688	4.17653	10.0551	4.2636	4.90007	0	0	4.8535	0	4.05404	3.98875
hs336	4.41567	0	0	0	0	3.02501	2.6158	0	0	2.5466	0	0	4.28233	0	0	0	0	0	0	0	0	0	0	0	5.4045	0	0	0	9.65604	5.46218	0	0	0	0	0	0	0	4.13136	4.09528	0	0	0	5.14752	4.40782	0	0	0	0	0
hs561	4.78156	6.27197	0	0	0	0	4.56864	0	0	0	4.20204	0.034176	4.09498	0	0	0	0	4.20207	0	0	0	4.1945	0	0.750005	0.128929	0	8.6184	4.24109	4.24109	4.11577	0	8.33349	4.7167	0	4.01637	0	4.72125	0	4.6073	0	4.26841	4.01954	0	0	0	4.11577	4.3019	4.61083	0
hs661	25.3387	10.0818	0	0	0	0	0	0	0	0	4.82391	0	0	0	4.065	0.0199284	0.0215243	0	0	0	0	0	3.92553	4.01841	0	0	0	0	8.78324	4.16115	6.64985	4.34834	2.60939	0	4.40982	0	0	8.66805	4.24642	0	5.18642	0	0	21.9843	4.23657	2.76518	0	11.4699	4.4597
hs700	9.39941	0	0	0	13.9624	0	0	0	0	0	0	0	0	0	0	0	0	0	0	0	0	0	0	9.29071	4.77469	0	0	11.1646	9.63586	7.82729	4.12404	4.55254	4.21753	0	9.6498	0	0	4.62433	3.19759	0	0	0	4.33442	8.72276	0	4.23732	0	0	11.8173
hs1532	4.4045	5.11976	0	0	0	0	0.0398367	0	0	0	0	0	0	2.5923	0	0	0	0	0	0	0	0	4.34251	3.84504	0	0	0	9.42331	4.86967	5.2204	0	0.495749	0.0834433	0	0	4.007	0	8.71095	0.0427357	0	0.0100137	0	0	4.1261	0	0	0	0.0534111	0
hs993	8.78532	8.3425	4.53313	4.64065	3.27639	4.15537	3.69497	0	0	3.7153	0	0	4.2721	4.29414	0	0	0	0	4.21383	4.02344	3.92655	7.79481	4.37394	9.02938	0	0	0	7.11418	8.59715	4.70774	0.842784	4.00311	0	0	13.7898	0	4.36053	0	4.16622	0	4.09818	6.26105	4.37675	5.20551	8.51051	3.44525	0	9.89286	0.0188711
hs605	4.20482	4.25496	0	0	3.72405	0	0	0	4.01225	0	0	0	0	0	4.02228	9.02742	8.55779	0	4.09474	0	0	4.56384	0	0	0	0	0	4.4168	5.97062	4.24109	0	0	0	0	0	0	0	4.04968	0	0	4.08249	0	0	4.6038	0	0	0	8.33426	0
hs940	0	0.292982	0	0	0	0	0	0	0	4.10285	0	0	0	0	0	0	0.0556042	0	0.0609303	0	0	0	0	4.03268	0	0	0	0	0	0	0	0.0112271	0	0	0	0	0	0	0	0	0	0	0	0	0	0	0	0	0
hs579	0	4.08197	0	0	0	0	4.11805	0	4.09726	0	5.73049	6.45322	0	4.04576	0	0	0	0	0	0	0	0	0	0	4.22403	0	0	0	4.26922	0	4.8446	0	4.38865	0	5.67383	0	0	8.67601	4.40362	0	0	4.27651	0	0	0	0	0	4.42739	3.03353
hs980	4.95078	2.35275	0	0	0	4.18376	8.32261	0	0	0	0	0	0	0	0	0	0	0	0	4.33255	0.011265	0	4.25259	9.73537	4.16431	0	0	0	0	0	0	0	0	0	0	0	0	0	0	0	0	0	0	5.14327	0	0	0	0	0
hs647	0	0	0	0	0	0	0	0	0	4.17802	0	0	0	0	0	4.47854	4.15424	0	0	0	0	0	3.84671	0	0	0	4.44249	0	0	0	4.08661	3.77527	4.00966	0	0	0	0	4.1933	3.66229	0	0	0	0	0	0	0	0	0	0
mm20	0	0	0.0126634	0	3.83291	0	0	0	0	0	0	0	0	0	0	0	0	0	0	0	0	0	0	0	0	0	0	0.0264355	0	0	0	1.20774	4.23194	0	4.50046	0	0	0.0629618	0	0	0	0	0	0	4.24642	0	0	0	0
hs2151	0	0	0	0	0	0	0	0	0	0	0	0	0	0	0	0	3.97278	0	0	0	0	0	0	0	0	0	0	0	0	0	0	0	0	0	0	0	0	0	0	0	0	0.0239101	0	0	0	0	0	0.0340232	0
mm450	6.46877	4.7125	0	0.328974	0	0	0	0	0	0	0	0	0	0	0	0	0	0	0	0	0	0	0	0	0	0	0	0	4.17849	0	4.67076	5.45158	4.37032	0	5.31371	0	0	0	0.378713	0	0.485587	0	4.26539	0	3.75846	0	0	0.381043	0
mm451	8.64024	9.08437	0	0	0	0	0	0	4.09366	0	0	8.31722	0.0836487	0	4.61261	0	0	0	0	0	0	1.40885	0	11.7873	0	0	0	4.22185	4.11014	0	0	4.81837	0	0	4.03012	0	0	0	0	0	0	0	0	4.29332	0	0	0	1.90432	0
hs1603	0	0.526468	0	0	0	0	0	0	0	0	0	0.031974	0	0.110133	0	0	0	0	4.14752	0	0	3.08241	4.27003	0	2.12699	0	0.637664	0	0.316635	0	9.26192	4.19863	0	0	2.91398	0.430368	0	9.00061	0	0	0	5.54158	0	0	1.12658	4.057	0	0	5.44779
hs895	8.43528	5.34702	4.65956	0	3.41839	4.30627	6.51051	4.06198	1.96549	0	0	0	8.26243	0	0	0	0	5.47123	0	4.39147	4.15739	0	0	0	0	0	0	0	0	0	0	5.93831	0.28048	0	4.11578	0	0	4.33724	4.89893	0	4.71428	0	0	0	0	4.01207	0	0	0
hs233	0	1.9775	0	0	0	0	4.02411	0	0	0	0	0	2.94862	0	0	0	0	0.684558	0	0	0	0	0	4.45469	0	0	4.66136	0	0	0	4.53165	4.03198	4.62893	0	4.21467	0.0808463	0	5.20066	3.61015	0	3.05451	0	0	0	0	0	0	2.93943	0
mm456	0	3.17323	0	4.11656	0	0.158184	0	0	0	0.0909892	0	0	0	0	0	0	0	0	0	0	0.0927541	0	0	1.05239	0.950041	0	0	0	0	0	0	4.83565	0	0	4.13906	4.6073	4.07988	0	0	0	0	0.0168314	0	0	0	0	0	0	0
mm1353	0	0.689393	0.38028	0	0	0	0.0241049	0	0.375814	0	0	0.0401672	0	0	2.89924	0.14083	0.144747	0	0	0	0	0	0	0.525799	0.188288	0.0102902	0.335461	0	0	0.016141	0.062632	0.259578	0	0	0.306989	0	0	1.0551	0	0	0	0	0.0165356	0.0961963	0	0.423401	0	0.222444	0.0435386
mm1396	2.69233	3.35137	0	0	0	0	0	0	0.0894578	0	0	4.44746	0.998673	0	0	0	0	0	0	0	0	0	0	0.554012	1.31881	0	6.52	3.77608	1.36257	0	0.721358	2.95436	0.65782	0	4.2412	0	0	4.21399	2.88507	0.0237933	2.93779	0.0266125	3.57311	0	0	3.4485	0.0262185	3.9768	1.35753
mm289	0	0	0	0	0	0	0	0	7.02649	0	0	0	0	0	0	0.144374	0	0	0	0	0	0	0	0	0	0	0	0.072624	0	0	0	0	0	0	0	0	0	0.0959176	0.0374503	0.0142012	1.61078	1.83382	5.77962	1.60643	0.0353697	2.53248	5.70862	4.90184	6.19879
hs1948	0	0	0	0	0	0	0	0	0	0	0	2.65811	0	0	0	0	0	0	0	0	0	0	0	0.270208	0.0909136	0	0.0117192	0	0	0	0	0.976566	0.97195	0	0	0	0	0.0116641	0	0	0	0	0.131109	0	1.86823	7.20658	0	0	0
mm1379	0.0178839	0.297371	0.096248	0	0.994571	0	4.25821	0.0297671	0.25694	0.0325685	0	0	0.723964	3.49732	0.0147508	4.28855	4.54202	0	0	0	0.0297346	0	0	0.0377528	0	0	0.0119094	0.0204283	0.0209964	0	0.0671663	0	0	0	1.36413	0.0358296	0	3.55991	0.183757	0	0	0	0	0	0	0	0	0.0267815	0
hs536	0	4.82974	0	0	3.88389	0	0	0	0	0	4.8729	0	4.27983	0	0	0	0	4.55596	0	0	0	4.30539	0	4.91009	4.28233	0	0	0	0	0	0	4.2525	4.20343	4.03245	2.74255	0	2.204	4.02984	0	0.473283	0.486317	4.38118	4.77609	0	0	0	0	0	4.15773
hs870	3.85441	4.15435	1.07007	0	0	4.17392	4.82681	0	0	0	0	4.05948	0	0	0	5.24795	4.36051	0	0	0	0	0	0	0	0	4.48678	0	0	0	0	4.87592	6.35225	4.37827	0	8.64484	4.00615	0	0	0	0	0	0	0	0	0	0	0	2.37881	0
hs386	0	0	0	0	0	0	0	0	0	0	0	0	0	0	0	0	0	0	0	0	0	0	0	0	0	0	0	3.56122	0	0	0	0	0	0	0	0	2.06076	0	0	0	1.7442	6.22792	1.30592	0	0	0	0	0	0
hs385	4.09151	4.38616	4.1798	0	4.10926	0	0	0	0	4.1549	0	0	5.03668	0	0	0	0	0	0	0	0	0	0	0	0	0	8.49235	4.48017	4.48017	0	0	4.04191	0	0	4.0075	0	0	5.36653	0	0	0	0	0.0171227	0	0	0.840522	0	0	0
hs384	0	0	0	0	0	4.28067	4.05355	4.53611	0	5.40121	0	10.6816	0	0	0	0	0	4.19654	4.13342	0	8.99686	4.75023	4.35458	3.40525	4.09637	0	0	0	4.26922	0	11.1342	7.07058	5.53462	0	0	4.39469	0	5.20239	0	0	0	5.34199	4.02457	0	4.02687	4.10363	0	4.32698	0
hs821	14.0681	4.47956	0	0	0	4.04479	4.27491	0	0	0	4.26281	0	0	0	0	0	4.56236	0	4.01682	0	0	0	4.05257	0	0	0	4.11805	0	8.87813	4.13549	0.430804	0	0.0998905	0	3.37337	0	3.29009	4.24732	4.79262	0	4.19353	4.31172	8.2231	4.45967	0	0	0	1.28802	0
hs615	5.42366	3.91585	0	0	4.36151	4.15366	4.4389	0	0	0	0	0	4.50031	0	0	0	0	4.25414	0	0	4.06964	4.03152	4.52227	5.53226	0	0	0	4.67185	4.37311	4.67185	4.05799	2.26388	0.0963648	0	3.86599	0	1.85569	7.70684	0	0	0	0.373028	0	4.65561	0	0	0	0	0.0962179
hs430	0	4.93181	0	0	4.14935	4.59692	8.86625	4.63221	4.70553	5.8951	0	0	0	0.0144524	0	0	4.13158	2.25975	0	4.12552	4.68721	4.21551	4.82215	8.4837	4.30277	4.34142	6.65482	0	0	0	5.08673	5.20187	4.73199	0	8.65744	4.00261	0	4.57757	4.21826	0	4.05005	4.05737	4.17337	0	4.5157	5.05022	4.18758	4.25046	4.26318
hs383	8.70643	0	4.16685	0	0	0.0922008	4.0985	4.10237	4.16368	0.131247	0	0	0	4.88273	0	0	7.95144	4.95468	4.11014	5.55464	0.12717	0	0.147437	0	4.34486	0	0	4.72816	5.49757	4.0511	4.34025	0	0	0	0	0	4.12341	0	4.14416	0	0	3.42168	4.38091	0	0	4.50724	0	4.35303	0
hs858	4.5867	1.80623	4.01189	1.26733	0.881136	0	0	0	0	0	0	0	0	2.56755	0	4.17718	4.82391	0	0	0	0	0	0	6.19531	0	0	0	4.23284	9.26114	0	8.60475	8.74485	4.08725	0	1.73866	0	0	0.68144	5.60799	5.84469	5.37802	5.18021	4.81378	4.96186	3.97563	0.735375	4.29113	4.79401	4.47471
hs721	0	0	0	0	0	0	0	0	0	0	0	0	4.02505	0	0	0	0	0	0	0	0	0	0	2.91824	4.68194	0	0	0	0	0	6.35157	8.53871	14.5624	4.56592	5.07353	5.59106	4.15866	0	0	0	0	0	0	0	0	0	0	0	0
hs382	0	0	2.69999	0	0	4.34872	4.51145	0	4.86646	4.37986	0	0	0	4.81647	0	0	0	0	0	4.40894	0	3.97316	4.81248	3.73056	0	0	0	0	0	0	0.0870192	0	0.111115	0	0.104266	0	0	0	0	0	0	0.41186	6.4355	4.03058	0	0	0	2.84032	2.53843
hs381	0	0	0	0	0	0	0	0	0	0	0	0	0	4.1779	1.05142	0	0	0	4.10692	0	0	0	0	0	0	0	1.1829	4.14874	0	0	0	0	0	0	0	0	0	0	0	0	0	0	0	0	0	0	0	4.19876	4.12033
hs587	4.18575	4.11351	0	0	0	0	0	0	0	0	0	0	0	0	0	0	4.16749	0	0	0	0	0	0	0	0	0	0	4.24109	4.24109	4.11577	0.0100254	0.0471298	0.0259099	0	0.0136393	0	0	0.0512719	0	0	0	0	0	4.22548	0	0	0	0	0
hs1977	0	0	0.0182198	0	0	0	0	0	0.909232	0	0	3.0956	0	0	0	0	0	0	0	4.11919	0	3.81557	0	4.06584	4.48569	0	0	0	0	0	1.76336	0.578802	0.0546093	0	2.24822	0.0517938	0.0558546	0	3.99613	0	3.77539	2.24724	0	0	0	0	0	4.61614	0
hs2144	1.62346	0.0130424	0	0	1.14946	0	0	0	0	0	0	0	2.43921	0	0	0	0	0	0	0	0	0	0	0	0	2.99445	0	0.0186409	0.0202038	0.0215044	0	0.125209	0	0	0.386874	0	0	4.58191	0	0	0	0	0	0	2.20015	0	0	0.37918	0
hs2146	0	1.44311	0	0	0.0683731	0	0	0	0	0	0	0.763242	0	0	0	0	0	0.0103843	0	0	0	0	0	0	0.180953	0	0.0106092	0	0	0	0	0.259816	0.26425	0	0.0707194	0.29147	0	0.452265	0.0214242	0	0.052208	0	0	0	0.0185046	0	0	0.375475	0.109155
mm684	0	0.215062	0.015016	0.0838067	0	0	0.0816594	0	0	0	0	0.0438148	0.0464764	0	0	0	0	0	0	0	0	0	0	0.203234	0	0	0	0	0	0	0	0	0	0	0	0	3.63337	2.08347	0.0183249	0	0.0197025	0	0	0.195794	1.13893	0	0	0.050849	0
hs2231	0.0450073	0	0	0	0	0	0	0	0	2.01456	0.0271746	0.248589	0	0.807746	0.0150726	0.0249185	0.0216354	0	0	0	0	0	0	0	0	0	0.0105837	0	0	0	0.178744	0.147254	0.0342747	0	0.0397743	0	0	0	0	0	0	0	0	0.0121762	0	0.0135083	0	0	0
hs1932	0.0164764	0.20122	0	0.112819	2.54658	0	0	0	0	0.0409952	0	0.0332403	2.56248	0	1.56155	0	0	0	0.126337	0	0	0	0	0	0.0123019	0	0	0.0147775	0	0	4.01404	0	4.19974	0	4.16667	0	4.39845	0.0194887	2.07337	1.96926	2.15664	0.931895	1.19801	0	0.140795	0.121379	0	2.13104	0.0121865
mm727	0	0	7.51596	3.74611	3.35878	0	0	0	0	0	0	4.02732	9.75574	3.1161	2.32879	0	0	10.6771	3.59469	0	0	0	0	4.59925	0.0601767	0	0.0542079	0	0	0	0.958604	11.3565	1.11649	0	5.67652	1.18958	2.56521	3.60146	3.85029	0	3.24554	0	3.45359	0	4.04181	0	0	3.21003	3.56325
hs184	0	9.29973	0	0	4.67307	0	0.971447	0	0	0	0	0	0	0	0	0.337942	0	0	0	0.104245	0	0	0	0	8.66209	0	0	0	0	0	0	5.26818	0	0	4.66077	0	4.20621	9.1666	0.0507567	0	0.0461398	0	0.0433997	0	0	3.58414	4.04721	0.0582793	0.0515257
hs1320	4.04672	0.016453	0	0	2.71731	0	0	0	0.0532744	0	4.2994	4.21582	4.29591	0.0501847	4.95861	0	0.295167	0	0	0	0.0428522	0.959479	0	6.04707	2.39814	0	4.16435	0	0	0	3.92581	0	0	0	8.09297	3.19922	3.95961	0.0236745	3.82443	0	4.27938	0	3.96493	0	0	4.10333	0	0.0151454	2.21847
hs624	8.65354	4.12668	0	0	0.0195072	0	0.37166	0	0	3.68573	0	4.94197	0	3.98471	0	0	4.76614	3.40106	0	0	0	0	0	0.0529135	0	0	0.03035	4.05007	0	0	3.57332	3.32861	0	0	4.60799	0	0	4.07321	0.0753512	0.0893645	4.4436	0.0869125	0	7.93282	0.25378	0	0	4.2494	3.96975
hs1686	0	0	0	0	0	0	0	0	0.0444237	0	0	0	4.44904	0	0	0	0.0819093	0	0	0	0	0	0	0	0.369039	0	0.598341	0	0	0	0.0105016	0.16058	0.103706	0	0	0	4.42418	4.69632	0	0	0	1.08265	0	4.943	0	0	0	0	0
mm1397	0.248347	1.47703	0	0	1.78173	0.0327826	0	0.0318641	0.716588	0.0332257	0	0.189873	0.825341	0	0	0	0	0	0	4.24836	0.0320407	0	4.17393	3.23851	0.472361	0	0.826926	0.193047	0.254743	0	0	3.91585	0.693195	0	1.71981	0	0	0.143883	0.227736	0	0.48263	0	0	0.0417032	0.0256503	0.299643	0	2.85704	0
mm1320	0.189668	1.51186	0	0	0.54712	0	0.308119	0	0.065587	0.0107922	0	3.67357	1.13745	0.367082	0	0	0.244255	0	0.0348546	0.0118287	0	0.0253742	0	0.334095	0.241623	0	0	0.254028	0.197389	0	0	0	0.0118951	0	0	0	0	0.181464	2.89458	0	0	0	3.27656	0	0.855559	0.340363	0	0	0.0183293
mm169	0	0	0.104752	0	1.54204	0	0	0	0	0	0	0.030907	0.976872	0	0	1.19708	1.0459	0	0.159764	0	0.168775	0.345655	0	0.0491356	0	0	0	0	0	0	0	0.0206139	0	0	0.0204369	0	0	0	0	0	0	0	0	0	0.675524	0	0	0	0
mm170	5.78794	0	0.0234978	0	0	0	0	0	0	0	0	0.0669141	0.017164	0.0251826	0	0	0	0	0	0	0	0	0	0	0	0	0	1.3889	1.3889	1.45172	0	0	0	0	0	0	0	0.19622	4.88701	0.228507	4.61098	0	0.247128	1.94617	0	0.0129734	0	4.55752	0
hs1514	4.87548	0	0	0	0	0	4.28334	0	0.357234	0	0	1.32678	0	0	0	0	0	0	0	0	0	0.462938	0	0	0	0	0	3.93347	4.04286	0	0	0	0.0225972	0	0	0	0	3.51824	0	0	0.0223807	0	0	0	0	0	0	0	0
hs1494	0	0	0	0	0.455031	0	4.12212	0	0	0	2.59644	0	4.56396	0	0	3.91573	3.94488	0	0	0	0	0.751349	0	0	0	0	0	0	0	0	0	0	0	0	0	0.0477835	0.0593552	0	0.731339	0	0	0	0	0	0	0.0540446	0	0.0846569	0
mm729	0	0	0	0	0.102932	0.0194467	3.88419	0	0.903806	0	3.30305	0	1.63573	0	0	0.330596	0.453108	0	0	0	0	0	0	1.31326	0.194291	0	0	0	2.12192	0	0.172216	0.286505	1.10684	0	1.41112	0	0.0493382	0.22353	4.52162	4.05173	4.31872	0.0493047	0	0	0	8.02924	0	4.38962	0.0799712
hs1689	1.8684	0.423457	0	0	0.0566089	0	0	0	0	0	0	0.0160625	0	0.0942342	0	0	0	0	0	0	0	0	0	0.0145042	0	0	0	1.58323	1.58323	0.10813	0.908183	0.155829	0	0	1.8566	0	4.3175	4.51458	0.012078	0	0.176112	0	0	0.214254	0	1.52473	0	4.67706	0
hs1435	0	0.0173633	0	0	5.65514	0	0	0	3.76639	0	2.31358	4.00881	0	0	4.32057	2.78069	4.34529	0	0	0	0	4.02702	0	0.125024	0	0	0.0941556	2.56501	4.39635	0	0.0801049	0.115831	0.0331507	0	4.70552	0	0	4.91364	0	0	0	0	0	0	0	0.599125	0	0	0
hs1748	0.0102279	0.880538	0	0	0	0	5.44059	0	0	0	0	0	0	0.243989	0.0414329	0.0673363	0	4.29793	0	0.0300269	0.0177777	0	0.022395	0	0.0288622	0	0	0	0	0	0	0.0152349	0	0	4.0124	0.105716	0	0.504445	0	0	0.0440625	0	0	0.02975	0	0.01651	0	0	0
hs873	3.91604	13.0209	0	4.3439	0	0	0	0	0	0	0	0	0	4.56095	0	0	0	0	0	0	0	0	0	4.04144	0.156647	0	0	0	0	0	0	2.67317	0	0	0	0	0	0.131924	4.45717	0	4.19518	0	0	0	0	9.0896	0	4.69465	8.30554
mm263	0	0.27528	0	0	0	0	0	0	0	0	0	0	0	0	0	0	0	0	0	0	0	0	0	0	0	0	0	0	0	0	0	0	0	0	0	0	0	0.0433978	0	0	0.806197	0	0	0	0	0	0	0	0
mm686	0	2.00143	0	0	0.0228835	0	0.855456	0	3.29547	0.890974	0	0	0	0	0	0	0.0201297	0	0	0	0.821378	0	1.05997	0	0	0	0.0243605	8.08576	5.55851	7.57912	0	0.0235867	0	0	0	0	0	2.37346	3.48145	0	3.37372	5.03233	0	0	0	0	0.0192001	3.04222	4.07611
hs1859	6.88941	13.7174	0.166629	0	4.11919	0	0.0250971	0	0.163342	2.90767	0	0	0.187399	0	0	0	0	7.75719	0	0	0	0	0.0281865	3.2589	4.21112	0	0.0180082	4.53165	4.58336	4.24872	0	3.42442	0	0	0.39273	0	0	0	4.22965	0	4.31596	0.0292262	0.0181693	8.58004	0	0.106466	0	4.87367	4.54185
hs183	0	8.63845	4.46852	0	4.24104	0	4.05404	0	0	0	0	0	0	0	4.54363	0	0	8.91692	0	0	0	0	0	0	0	0	0	0	0	0	2.12666	4.9619	5.66292	0	3.99942	0	0	0	0	0	0	0	0	0	0	1.04616	0	0.0118416	0
hs333	0	0	0	0	0	0	0	0	0	0	0	4.03574	0	4.88606	0	0	0	0	0	0	0	0	0	0	0	0	8.35309	0	0	0	0	0	0	0	4.01694	0	0	0	0	0	0	0	0	0	0	4.45097	0	8.83068	0
hs2403	0	0.0654386	0	0	0.356137	0	0	0	0	0	0	0	0	0	1.8592	0	0	2.44478	0	0	0	0	0	1.66221	0	0	0	0	0	0	1.86915	0	0	0	0.359708	0	0	1.14821	0	0	0	0	0	0.0550392	0	2.46007	0	0.011455	0
mm725	0	0.156877	0	0.0289955	1.66603	0	0	0	1.99612	0	1.45786	1.18432	0.395001	0	0	0	3.13075	0	0.0342921	0	0	0.0433853	0	5.10729	0.0214042	0	1.55989	0	0	0	3.0329	0	0.204648	0.305928	0	0	0	0	0.299133	0	0.147825	0.0194722	0.0285339	0	0.0988293	0.293855	0	1.63262	1.52569
hs2378	0	1.37445	0	0	0.0159269	0	0.115529	0	0	0	0	1.99926	1.57441	0	2.1873	0	0	0	0	0	0	0	0	0	0	0	0	0.137205	0.137205	0.104729	1.15016	0.867865	1.25148	0	0	0	0	0	2.29116	0	1.94393	0	0	0	0	0	0	5.76933	0
mm79	0	3.13117	0	0	0.0100761	0	0	0	0.0131265	0	0	0	0.332852	0	0	0	0	0	0	0	0	0	0	0.0131455	4.73874	0	0	0	0	0	0	1.26901	0	0	4.36997	0	0.0820796	0.133817	0	0	1.77642	0	5.04588	0.346643	0	0	0	1.5788	0
hs2076	1.66032	1.66062	0	0	0	0	0	0	0	0	0	4.37724	0	0	0	0	0	0	0	0	0	0.421225	0	2.22612	0	0	0	1.54644	1.63541	0.347152	1.76343	0	1.67405	0	0	0	0	0.0194203	5.04274	0	4.44629	0.0202556	0.0106767	1.26376	0	0	0	0	0
hs1314	4.30314	0.0866692	0	0	4.74844	0	0	0	4.52143	4.07877	0	0.230661	0	4.00745	0	0.011146	0	0	4.11182	2.04264	0	0	0	0.338531	0.140519	0	0.0382241	0	4.05502	0	3.72316	4.51288	0	0	4.12784	0	0.0265499	4.66544	3.96483	0	4.59981	4.10682	3.22581	0	4.01412	4.22683	4.22672	4.52633	0
hs681	9.48342	4.41567	4.88606	0	0	0	0	0	0	0	0	0	4.85078	4.03857	0	0	0	0	0	4.11295	0	0	0	0	8.39813	0	0	8.10611	4.05306	0	0	4.55284	4.06248	0	4.01909	0	4.06956	4.59176	4.22841	0	0	0	0	4.64207	0	0	0	0	0
hs692	0	4.11656	0.938365	0	0	0	0	0	0.463625	0	0	0	0.0885785	0	0	0	6.18791	3.23489	0	0	0	0	0.134012	0	5.64207	0	4.2644	4.22185	4.28819	4.41117	3.63669	4.65448	4.59688	0	0.218644	4.29671	0	4.57726	0	0	0	0	0	0	4.19827	0	0	0	0.110672
hs235	0	4.57187	0	0	0	0	0	0	0	0	4.39362	0	0	0	4.057	0	0	0	5.11976	0	0	0	4.20066	4.12205	9.71263	0	0	0	0	0	0.118802	0.852888	0	0	4.53692	0	0	1.18172	1.41098	0	0	1.39361	1.26428	0	4.33161	0	1.29848	4.53313	4.25026
mm897	4.48014	0.0505728	0	0	0	0	0.0849446	0	0	0	3.72586	0	4.05899	0	0	4.03993	4.03406	4.02238	0	4.33255	0	4.19791	0.982296	0	0	0	4.85673	4.70997	8.15269	4.70997	6.40934	5.86198	4.74556	0	4.16368	4.27002	0	5.46861	0.02853	0	0	0	0	0	4.98839	4.5003	0	0.236951	4.28462
hs1720	4.04915	0	0	0	0	0	0	0	0	0	5.03932	1.58315	0	0	0	0	0	0	4.17783	0	0	0	0	1.17024	0	0	0.0118042	4.43489	5.17534	4.39265	4.34284	1.52754	0	0	5.62009	1.39937	0	10.7983	4.2697	0	4.35262	0	0	7.37369	4.26281	3.83132	0	4.04742	0.071216
hs883	4.4045	0	4.32698	0	0	0	0	0	4.24934	0	0	0	4.19314	4.03058	0	0	0	0	0	0	5.31515	4.91721	0	4.77989	0	0	0	9.13577	8.65941	8.96005	0	0	4.17134	0	0	0	0	4.83863	1.63766	0	0	0	0	4.1261	0	0	0	1.49714	0
hs236	0	4.1945	0	0	0	0	4.03226	0	4.48149	0	0	0	0	4.52724	0	0	0	0	0	0	0	0	0	0	4.04866	0	5.36508	0.624673	0.624673	0.584674	4.03668	4.11226	4.47921	0	4.87526	0	0	12.2245	0.161137	0.178666	0.158682	0.176179	0.180803	0	0	0	0.171343	0.0478369	0
hs717	4.91078	5.68403	0	0	0	0	0	4.53018	0	4.6073	0	0	0	0.0332392	0	0	0	0	0	4.33255	0	0	0	0	0	0	0	0	4.02203	0	8.65094	0	4.37572	0	0	5.64782	4.75945	0	4.24642	0	0	0	0	4.21584	0	0	0	4.70333	0
hs1301	6.04528	0.0179943	0	0	4.02091	4.13966	4.24109	0	0	0	0	0	4.72354	1.97198	0	0	0	0	0	0	0	0	0	0	0	0	0	0	4.29158	4.90309	0	4.35853	0.34035	0	0.115139	0	4.30803	8.80232	4.18977	0	0	0	0	5.77728	0	4.2636	0	5.4389	4.28819
hs2096	0.152038	0.0566219	0.0112741	0	0.206873	0	0	0	0.192832	0	4.04404	1.77564	0.32966	0	0.0310064	0	0.0485822	0	0	0.0856649	0	0	0	0	0.0140584	0	4.06651	0.173511	0.0926212	0.0926212	0.0107464	0	0.0108674	0	0.105486	0	0	0.872599	3.08771	0	2.98852	0.0318977	0	4.37802	0	0.0844713	0	5.9946	0.0526016
hs97	0	0	4.2997	0	1.10113	0	3.82119	4.25216	0	8.83415	0	0	3.59753	0	0	4.05663	4.97843	0	0	4.28316	5.02221	4.85715	4.16171	0	4.27165	0	0	0	0	0	0	3.51485	0	0	4.3207	3.87813	0	0	0	0	0	0	0	4.10237	0	0	0	0	0
hs96	3.60275	5.00688	1.52405	0	0	0	0	0	0	0	0	3.93349	4.26139	0	0	0	0	0	0	0	0	0	0	0	2.10574	0	8.10361	4.05159	4.61979	4.19928	2.57419	3.3482	4.04518	0	1.5463	2.14408	0	0.153159	0	0	0	0	0	3.146	0	0	0	0	0
hs95	0	4.32331	0	0	0	0	0	0	0	0	4.08401	0	0	0	0	0	0	0	0	0	0	0	0	0	4.57331	0	0	4.71897	4.4168	4.71897	4.04634	0	4.80864	0	0	5.59913	4.8984	0	0.0129281	0	0.0104955	0	0	0	0	0	0.0100614	0.0115101	0.0101339
hs98	0	0	0	0	0	0	0	0	1.27299	4.15864	9.25629	4.84466	0	0.0102627	0	0	0	0	0	0	0	4.02074	0	0	0.12889	0	0	0	0	0	0.807175	1.05174	0.85038	0	0	0	4.64782	2.48567	0	0	0	0	0	0	0	0	0	0	0
hs99	0	0	0	0	0	0	4.09313	0	0	0	0	0	0	0	0	0	0	0	0	0	0	4.1317	0	0	0	0	2.08692	1.58529	0	1.58955	5.12791	0	3.0092	0	7.6083	0	0	10.4543	0	0	0	0	0	0	0	6.69428	0	2.59743	0
hs100	0	4.04777	0	0	0	0	0	0	0	0	0	0	0	0.0766808	0	0	0	0	0	0	0	0	0	0.0207184	0	0	0	4.05306	0	0	4.22026	0	0	0	0	0	0	7.85213	0	0	0	0.0201882	0	0	6.41814	0	0	4.66055	0
mm174	0	0.225662	0	0	0.223678	0	0.0132474	0	0	0	0	0	0	0	0	0	0	0	0	0.0118427	0	0	0.0140258	0.996688	0.0158922	0	0	0	0	0	0.0264932	0.0243487	0.0237296	0	0.392767	0	0	0	0.0124355	0	0	0	0	0.30572	0	0	0	0.0847077	0
mm607	0	4.5843	0	1.26781	0	0	0	0	4.12693	0	0	0	0.0303675	0	0	0	0	0	1.10583	0	0	0	0	0	0	0	3.86215	0	0	0	0	0	0	0	0	0	0	3.93736	0	0	0	0	0	0	1.20149	0	0	0	0
mm608	0	0	0	0	0	0	3.12537	0	3.26361	0	0	0	4.23441	0	0	0	0	4.07445	0.173388	4.34749	0	0	1.9716	1.94992	0	0	0	4.28956	4.01724	4.28956	2.53716	0	0	0	0	0	0	3.71236	3.7124	0	4.87041	0	0	0	2.86933	0.202156	0	0	4.70304
mm938	0	5.49894	0	0	0	0	0	0	0	0	0	4.60252	0	4.66743	0.0349757	0	0	0	0	0	0	0	0	7.68611	0	0	0.648282	0	0	0	0	4.23798	0.0918684	0	0	0	0	5.0192	0	0	0	0	4.0251	0	0	0	0	0	0
hs1319	0	2.52978	0	0	0	0	0	0	0	0	0	5.06702	3.54366	0	0	0.322439	0	2.33283	4.09474	0	0	2.08549	0	0	0	0	0.236652	4.70997	8.58157	4.70997	8.60905	8.79203	8.9222	0	14.4681	4.06298	4.00966	4.25885	4.78781	0	12.4919	0	0	0	0.0394912	2.28487	0	4.50864	0
hs329	0	8.6708	0	0	5.32239	0	4.09691	4.33913	4.87231	4.96257	4.35458	0	0	0	0	4.29585	5.55129	0	4.36251	4.37293	8.89751	0	0	2.07433	13.6699	0	0	0	0	0	4.29414	4.65758	4.41908	0	4.49546	0	0	5.56864	8.8308	0	0	4.13787	0	0	5.95468	0	0	4.59854	0.0509202
hs1005	5.17587	5.06651	0	0	0	0	4.70774	4.4908	0	5.07263	0	0	0	0	0	9.01958	13.2128	0	0	0	4.7167	0	0	0	9.74162	0	0	4.48017	4.48017	0	4.82209	9.14052	6.41208	0	2.71394	0	4.42196	4.24879	0	0	4.8041	0	0	0	0	2.74499	0	0	0
hs771	4.24872	4.08884	0	0	0	0	0	0	4.35579	0	4.14724	0	0	4.02045	0	0	0	0	0	0	0	0	0	4.08754	4.13018	0	0	4.72236	4.4352	4.72236	4.51145	0	0	4.33255	0	0	2.69206	3.53346	0	0	0	0	8.03524	7.75756	0	4.00656	0	4.44249	0
hs578	8.96719	4.36151	0	0	0	0	0	0	0	0	4.767	0	0	0	0	0	0	0	5.21396	0	0	0	0	4.95944	0	0	0	0	0	0	0	0	4.05998	0	4.20135	0	0.0409779	0	0	0	0	3.98683	0	4.67985	4.32422	0	0	0	0
mm547	0	1.27565	0	0	0	0	0	0	0.0103638	0	0	0	0.613306	1.07821	0	0	0	0	0	0	0	0	0	0	0	0	0	0	0	0	0	0	0	0	0	0	0	0	0	0	0	0	0	0	0	0.135673	0	0.146338	0
hs330	0	0	0	0	0	0	0	0	0	0	0	0	0	0	0	0	0	0	0	0	0	0	0	3.46632	0	0	0	0	0	0	0.0233117	4.08399	0.0319785	0	0	0	0	0	0	0	0	0	0	0	0	0	0	0	0.0291248
mm1405	0.0245427	0.30192	0	0.145987	0	0	0	0	0	0	0	2.79863	0.967891	0.943704	0.779524	0	0	0	0	0	0.607196	0.612306	0	0.703452	0	0	0	0	0	0	0	0.486726	0	0	0	0	0	1.09799	0.390876	0	0.0237524	0	0.256032	0	0.158966	0.14982	0	0.819324	0.0304058
mm1401	4.19913	3.6378	0	0	0.648475	0	0	0	1.70373	0	0	0	0.0625864	0	0	0	0	0	0	0	0	0	0	0	0.247062	0	0	0	4.02931	0	0.488101	0.0123785	0	0	0.0150221	0	0	3.3909	0.124402	0	0.0297621	4.12329	0	0	0.347837	0.206434	0.0239303	0.164812	1.71356
hs542	9.11343	0.589838	0	0	0	0	0	0	0	0	0	0	0	0	0	4.63827	4.53611	0	0	0	0	0	0	0	0	0	0	4.70774	4.70774	4.40671	0	0	0	0	0	0	4.04528	4.188	4.21914	4.52152	0	4.60768	4.79716	4.20135	0	0	5.24484	5.07731	5.13336
hs737	4.38828	4.15989	0	0	0	0	0	0	0	0	0	0	0	0	0	0	0	0	0	0	0	0	0	0	4.075	0	0	0	0	0	0.29211	0	0	0.239073	4.02725	0	0	0	0	0	0	0	2.31098	4.03953	0	0	0	0	0
hs699	0	4.49894	4.1152	4.43461	10.5045	0	0	0	0	0	4.37469	4.25964	0	0	0	0	0	3.24193	0	0	0	0	0	0	4.39686	0	0	4.72354	4.42366	4.72354	3.77485	17.2146	2.69991	0	8.31541	0	0	0	0	0	0	0	0	4.12697	8.01984	0	0	0	3.98348
hs562	0	6.25391	0	0	0	0	4.37929	0	0	0	0	0	7.48934	0	0	0	0	0	2.6306	0	0.249064	0.228574	0	3.505	5.17618	0	0	9.07694	8.99678	8.84117	0	4.04233	0.0595625	0	4.51145	4.53533	5.37155	4.10095	8.54542	0	4.12182	4.38113	4.88371	0	2.21833	0	1.92462	4.37085	5.94317
hs656	8.89066	0	0	0	0	0	0	0	4.39727	0	0	0	0	5.64595	0.128353	0	0	0	0	3.8067	0	0	0	4.27165	0.0943684	0	0	0	4.13985	4.10624	0	0	0	0	0	0	0.115968	0	0	0	0	0	4.92082	12.1383	0	4.44687	0	0	0
hs696	4.16348	8.5715	0	0	0	3.00739	2.70836	0	0	2.52925	0	0	4.67908	0	4.11004	0	0	0	0	6.97258	2.15174	0	2.92764	0	4.47625	0	0	4.70997	13.6684	4.40894	4.72717	3.93979	8.06589	0	9.54821	0	0	8.42598	0	0	0	0	0.0628823	0	0	0.0706463	0	7.96498	0
hs331	0	0	0	0	0	0	4.35	0	0	0	0	4.01062	0	0.273665	0	0	0	0	0	4.39147	0.390942	4.44296	0	4.27573	0	0	0	0	0	0	3.4268	4.06248	3.25942	3.50543	0.0311145	0	0	5.55651	0	0	4.04576	4.66354	0	0	0	0	0	4.96047	4.38195
hs589	4.20621	6.33819	4.68471	0	0	0	0	0	0	0	0	4.04719	0	8.58197	4.25181	0	0.0941511	4.60677	0	3.93726	0	0	0	0	0	0	3.99602	4.70997	4.70997	4.40894	0	0	0	0	0	0	0	0.0286841	0.20927	0	0	0	0	0	2.48266	0	0	0.162961	3.88943
hs232	10.0616	8.92403	0	0.525609	0	0	0	0	0	1.81467	9.47097	0	0	0	0	0	1.13492	0	0	3.68049	2.03411	0	3.39087	0	9.48287	0.0520226	0	4.11014	0	0	4.00524	4.08323	0	4.05355	5.25682	0	0	4.2233	3.57524	0	0	0	0	8.9441	2.07439	0	0	3.95065	4.85699
hs1488	3.97765	2.62148	0	0	0	0	0	0	0	0	0	0.956867	0	0	2.8637	0	0	0	0	0	0	0	0	0	0	0	0	0	0.0667757	0	0.0404124	0.0271944	0	0	0	0	0	0	0	0	0.516591	0	0	2.53995	0	0	0.0247355	0.165537	0.0220634
mm50	2.26589	3.33705	0	1.09847	0.010867	1.19487	5.58898	0	0	0	4.2027	0	0.0663216	0.253963	1.43676	0.0706123	0.187502	0	1.14133	0	0	0	0	4.24215	0	0	0	0	2.19477	0	0.0283861	0.20357	0	0	0.874721	0	0	0	0.0136728	0	0	0	0	0.0210245	1.13845	0.014074	0	0	0
mm47	0	0.0198993	3.53585	0	2.74579	0	0	3.23485	0	3.3115	0	0	0	0.0298845	0	0	0	3.51808	0	0	3.65009	5.3964	3.98297	3.99436	0	0	0	0	0	0	0.0413033	0.0152952	0	0	0.0127977	0.024379	0	1.32645	4.61798	0	4.10791	0	4.284	0	4.23726	0.244984	0	5.07883	0
hs1775	0	0	0	0	0	0	1.63531	1.07324	0	0	0	0.18005	0	0	0	0	0	0	0.0116403	1.79124	0	0.0106614	1.34673	0.144124	0	0	0	0	0	0	0	0	0	0	0	0	0.174247	0.0123677	0	0	0	0	0	0	0	0	0	0	0
mm183	0	0	0.818563	0	0	0	0	0	0	0.321179	0	0	0	0	0	0	0	0	0	0	0	0	0	0	0	0	0	0	0	0	0	0	0	0	0.0416359	0	0	0.290869	2.59798	0	0	0	0.0241223	0	0.0101745	0	0	0	0
mm603	0	0.0432181	0	0	0	0	4.16983	3.82536	0	3.74913	0	2.13648	0.0197417	0.0515397	0	0	0	0	0	4.05779	0	0.0213558	4.12253	4.13816	0	0	0	0	0	0	1.81672	1.32004	0	0	0	0	0	1.31531	0	0	0	0	0	0	0	0	0	2.16359	0
hs2227	1.34741	0	0.105164	0	0	0	0	0	0	0	0	0.226384	0	0	0	0	0	0	0	0.246121	0	0.264116	0.0215312	0.0305968	2.05647	0	0	0	0	0	0.0818072	0.397277	0.392621	0	0.16587	0	0	0.634383	0	0	0	0.0131357	0	1.10844	0	0	0	0.194774	0
hs1920	0	0	0	0	0	2.63724	2.9405	3.1066	0	2.88277	0	4.09103	1.21796	0	0.12417	0	0	0	0	3.36003	3.4203	0	0.0314152	0.0126454	0	0	0	2.03327	0	0	0.0749519	1.65489	1.24579	0	0.0412854	0	0	0.0923285	3.75398	0.0117091	0.113559	0.0148001	0.0142915	0	0	0	0.0127415	3.84463	2.93744
hs2073	8.40654	5.40658	0	0	0.322851	0	0	0	0.757559	0	0.013261	0.0254242	0	0	0	0.0179774	0	0	0	0	0	0	0	1.16092	2.99574	0	0	5.94084	6.56622	4.07184	0	0	0	0	0	0	0	3.73758	0.0104579	0.0113219	0	0.0112501	0.0109398	3.95387	0	0	0.0109022	0.010737	0
hs1991	0	4.36001	0	0	0	0	0	0	0.0428251	0	0	0	0.0588765	0	0.0748703	0	0	0	0	0.143489	0	0	0.184721	0	3.76095	0	0.0273677	0	4.23223	0	2.25066	0	0	0	0	0	0.995177	0	0.559842	0	0.576546	0	0.412358	0	0.0245119	1.31626	0	0.592564	0
hs1992	0.0448089	0.0216395	0	0	0	0	0	0	0.0747029	0	0	0.0109766	0	0	0	0	0	0	0	0	0	0	0.0724325	0.0155124	0	0	0.0179493	0.0346968	0.0377413	0.0372098	0.0188057	0	0	0	0	0	0	0.625067	0.051331	0.0239448	0.0396243	0.0250242	0.0122902	1.78768	0	0	0	0.0296123	0.0239894
hs759	0	0	0	0	0	0	0	0	0	0	0	0.0435306	0	2.78164	0	0	0	0	0	0	0	0	0	4.92056	8.37968	4.16494	0	5.2426	0	4.14388	4.1415	0	4.91118	0	0	0	0	4.32334	9.0573	0	4.60033	8.59726	0	0	0	0	0	14.371	10.0666
mm688	0	0	0	0	0	0	0	0	0.0422294	0	0	1.87545	0	0	0	0	0.136249	0.047074	0	0	0.855406	0	0	0	4.34969	0	0	0.214547	0	0.165178	0	0	0	0	0	0	0.433333	0	0	0	0	0	0.266654	0.194436	0	0.114723	0.0869424	0.108291	0.0956981
mm985	0	8.4869	0	0	0	0	0	0	3.23308	0	3.74469	0.24641	3.43914	0	0	3.98871	0	0	0	0	0	0	0	1.78727	0.0721086	0	0	4.44841	4.06204	4.44379	1.9413	1.86425	1.90816	2.38668	0.300236	1.694	0	4.1613	4.09211	0	4.17724	0.0188869	2.16269	4.07031	0	0.0729732	4.0003	4.80343	4.56871
[truncated: 297 more rows]
[truncated: 240 more columns]
